# Supplementary material for: Enantioselective Carbonylative Coupling Reactions: Merging Nickel-Based Selectivity and Photoredox Reactivity
Source: Research Square preprint supplement (doi:10.21203/rs.3.rs-5678932/v1), 2025-02-05
Supplement: Supplementary file 1 [file 2938c81e306970062f68bdf5.pdf]

## Supplementary Information

# **Enantioselective Carbonylative Coupling Reactions: Merging Nickel-Based Selectivity and Photoredox Reactivity**

Ling Li,<sup>a</sup> Zhen Hu,<sup>b</sup> Shuaikang Ren,<sup>a</sup> Bruce A. Arndtsen,<sup>b,\*</sup> Lingling Chu<sup>a,\*</sup>

<sup>a</sup> State Key Laboratory for Modification of Chemical Fibers and Polymer Materials, College of Materials Science and Engineering, Center for Advanced Low-Dimension Materials, Donghua University, Shanghai 201620, China

<sup>b</sup> Department of Chemistry, McGill University, 801 Sherbrooke Street West, Montreal, Quebec H3A 0B8, Canada

Email: lingling.chu1@dhu.edu.cn; [bruce.arndtsen@mcgill.ca](mailto:bruce.arndtsen@mcgill.ca)

## Table of Contents

|     |                                                                         |      |
|-----|-------------------------------------------------------------------------|------|
| 1.  | Materials and Methods .....                                             | S3   |
| 2.  | Supplementary Tables and Figures .....                                  | S4   |
| 3.  | Substrate Synthesis .....                                               | S14  |
| 4.  | General Procedure for Enantioselective Carbonylative Couplings<br>..... | S19  |
| 5.  | Characterization of Products .....                                      | S20  |
| 6.  | Gram-Scale Reaction .....                                               | S79  |
| 7.  | Synthetic Transformations .....                                         | S81  |
| 8.  | Mechanistic Studies .....                                               | S90  |
| 9.  | X-Ray Crystallographic Data .....                                       | S99  |
| 10. | NMR Spectral Data .....                                                 | S127 |
| 11. | References .....                                                        | S204 |

## 1. Materials and Methods

Commercial reagents were purchased from Adamas, Aldrich, TCI, Energy Chemical, Bide, Leyan.com, Aladdin, Merck, Alfer and J&K chemical, and were used as received.

All reactions were carried out in oven-dried glassware under an atmosphere of nitrogen or CO unless otherwise noted. Research grade carbon monoxide (99.99%) was used as received. Warning: CO is a poisonous gas that requires all the experiments to be conducted in well-ventilated fume hoods. Chromatographic purification of products was accomplished by flash chromatography using silica gel. Thin-layer chromatography (TLC) was performed on Silicycle 250 mm silica gel F-254 plates.  $^1\text{H}$ ,  $^{13}\text{C}$ ,  $^{19}\text{F}$  and  $^{31}\text{P}$  NMR spectra were recorded on Bruker 400 (400, 101 and 377 MHz) and are internally referenced to residual solvent signals (for  $\text{CDCl}_3$ , 7.26 and 77.16 ppm, and for Acetone- $d_6$ , 2.05, and 29.84, 206.26 ppm). Data for  $^1\text{H}$  NMR,  $^{19}\text{F}$  NMR and  $^{31}\text{P}$  NMR are reported as follows: chemical shift ( $\delta$  ppm), multiplicity (s = singlet, d = doublet, t = triplet, m = multiplet, br = broad), integration, coupling constant (Hz).  $^{13}\text{C}$  spectra were reported as chemical shifts in ppm and multiplicity where appropriate. High resolution mass spectra were obtained at Shanghai Institute of Organic Chemistry mass spectrometry facilities. EPR spectra for radicals were obtained at East China Normal University on BrukerEMX instrument EMXPLUS-10/12. EPR spectra simulation was conducted on the Bruker SpinFit software. Optical rotations were measured on an automatic polarimeter.  $[\alpha]_{\text{D}}^{\text{T}}$  values reported in  $10^{-1} \text{ deg cm}^2 \text{ g}^{-1}$ ; concentrations (c) are quoted in g/100 mL. D refers to the D-line of sodium (589 nm); temperatures (T) are given in degrees Celsius ( $^{\circ}\text{C}$ ). High performance liquid chromatography (HPLC) analysis on chiral stationary phase was performed on a Shimadzu 20-series instrument. Chiralpak IA-H or AD-H columns with hexane:  $i\text{-PrOH}$  as the eluents were used. Photochemical experiments have been performed using a blue LED light ( $\lambda_{\text{max}} = 467 \text{ nm}$ ,  $393 \text{ mW/cm}^2$ , Kessil A360W E-SERIES TUNA Blue LED). Benzyl chlorides,<sup>1</sup> anilines,<sup>2-4</sup> and chiral ligands<sup>5</sup> prepared according to the previously reported procedures.

## 2. Supplementary Tables and Figures

Supplementary Table S1: Effect of chiral ligands

|                    |                      |                    |                     |  |
|--------------------|----------------------|--------------------|---------------------|--|
|                    |                      |                    |                     |  |
|                    |                      |                    |                     |  |
| (S)-L1 13%, 14% ee | (S)-L2 19%, 11% ee   | (S)-L3 47%, 43% ee | (S)-L4 70%, 90% ee  |  |
|                    |                      |                    |                     |  |
| (S)-L5 75%, 92% ee | (S)-L6 7%, 0% ee     | (S,S)-L7 0%        | (S,S)-L8 10%, 9% ee |  |
|                    |                      |                    |                     |  |
| (S,S)-L9 0%        | (S,S)-L10 6%, 14% ee | (S,S)-L11 0%       | (S)-L12 10%, 7% ee  |  |

Reaction conditions: (1-chloroethyl)benzene (0.1 mmol), PhNH<sub>2</sub> (0.15 mmol), CO (1 atm), Ir(ppy)<sub>2</sub>(dCO<sub>2</sub>Etbpypf)PF<sub>6</sub> (2 mol%), NiCl<sub>2</sub>·6H<sub>2</sub>O (8 mol%), **chiral ligand** (10 mol%), BnBpin (1.0 equiv.), MgBr<sub>2</sub> (1.0 equiv.), DME/EtOAc (0.1 M, v/v = 7:3), ~50 °C, 12 hours, blue LED.

**Comment:** The chiral PHOX ligand (S)-L5 was selected as the optimal ligand.



**Supplementary Table S2: Effect of solvents**

| <div style="display: flex; align-items: center; justify-content: space-around;"> <div style="text-align: center;">  <p>0.1 mmol</p> </div> <div style="text-align: center;"> <p>CO</p> <p>1 atm</p> </div> <div style="text-align: center;"> <p>PhNH<sub>2</sub></p> <p>1.5 equiv.</p> </div> <div style="text-align: center;"> <p>Ir(ppy)<sub>2</sub>(dCO<sub>2</sub>Etbpv)PF<sub>6</sub><br/>(2 mol%)<br/>NiCl<sub>2</sub>·6H<sub>2</sub>O (8 mol%)<br/>(S)-L5 (10 mol%)<br/>BnBpin (1.0 equiv.)<br/>MgBr<sub>2</sub> (1.0 equiv.)<br/>Solvent = 7:3 [0.1 M]<br/>blue LEDs, 50 °C, 12 h</p> </div> <div style="text-align: center;">  <p>3</p> </div> </div> |                 |                |             |
|------------------------------------------------------------------------------------------------------------------------------------------------------------------------------------------------------------------------------------------------------------------------------------------------------------------------------------------------------------------------------------------------------------------------------------------------------------------------------------------------------------------------------------------------------------------------------------------------------------------------------------------------------------------------------------------------------------------------------------------------------------------------------------------------------------------------------------|-----------------|----------------|-------------|
| Entry                                                                                                                                                                                                                                                                                                                                                                                                                                                                                                                                                                                                                                                                                                                                                                                                                              | solvents        | yield of 3 (%) | ee of 3 (%) |
| 1                                                                                                                                                                                                                                                                                                                                                                                                                                                                                                                                                                                                                                                                                                                                                                                                                                  | THF             | 65             | 88          |
| 2                                                                                                                                                                                                                                                                                                                                                                                                                                                                                                                                                                                                                                                                                                                                                                                                                                  | DME             | 72             | 89          |
| 3                                                                                                                                                                                                                                                                                                                                                                                                                                                                                                                                                                                                                                                                                                                                                                                                                                  | Dioxane         | 46             | 81          |
| 4                                                                                                                                                                                                                                                                                                                                                                                                                                                                                                                                                                                                                                                                                                                                                                                                                                  | DMA             | 53             | 88          |
| 5                                                                                                                                                                                                                                                                                                                                                                                                                                                                                                                                                                                                                                                                                                                                                                                                                                  | EtOAc           | 68             | 90          |
| 6                                                                                                                                                                                                                                                                                                                                                                                                                                                                                                                                                                                                                                                                                                                                                                                                                                  | PhCl            | 45             | 86          |
| 7                                                                                                                                                                                                                                                                                                                                                                                                                                                                                                                                                                                                                                                                                                                                                                                                                                  | DME/DMA = 7:3   | 60             | 83          |
| 8                                                                                                                                                                                                                                                                                                                                                                                                                                                                                                                                                                                                                                                                                                                                                                                                                                  | DME/EtOAc = 7:3 | 75             | 92          |

Reaction conditions: (1-chloroethyl)benzene (0.1 mmol), PhNH<sub>2</sub> (0.15 mmol), CO (1 atm), Ir(ppy)<sub>2</sub>(dCO<sub>2</sub>Etbpv)PF<sub>6</sub> (2 mol%), NiCl<sub>2</sub>·6H<sub>2</sub>O (8 mol%), (S)-L5 (10 mol%), BnBpin (1.0 equiv.), MgBr<sub>2</sub> (1.0 equiv.), **solvent** (0.1 M), ~50 °C, 12 hours, blue LED.

**Supplementary Table S3: Effect of catalysts**

| <div style="display: flex; align-items: center; justify-content: space-around;"> <div style="text-align: center;">  <p>0.1 mmol</p> </div> <div style="text-align: center;"> <p>CO</p> <p>1 atm</p> </div> <div style="text-align: center;"> <p>PhNH<sub>2</sub></p> <p>1.5 equiv.</p> </div> <div style="text-align: center;"> <p>Ir(ppy)<sub>2</sub>(dCO<sub>2</sub>Etbpv)PF<sub>6</sub><br/>(2 mol%)<br/><b>Ni catalyst (8 mol%)</b><br/>(S)-L5 (10 mol%)<br/>BnBpin (1.0 equiv.)<br/>MgBr<sub>2</sub> (1.0 equiv.)<br/>DME:EtOAc = 7:3 [0.1 M]<br/>blue LEDs, 50 °C, 12 h</p> </div> <div style="text-align: center;">  <p>3</p> </div> </div> |                                         |                |             |
|----------------------------------------------------------------------------------------------------------------------------------------------------------------------------------------------------------------------------------------------------------------------------------------------------------------------------------------------------------------------------------------------------------------------------------------------------------------------------------------------------------------------------------------------------------------------------------------------------------------------------------------------------------------------------------------------------------------------------------------------------------------------------------------------------------------------------|-----------------------------------------|----------------|-------------|
| Entry                                                                                                                                                                                                                                                                                                                                                                                                                                                                                                                                                                                                                                                                                                                                                                                                                      | conditions                              | yield of 3 (%) | ee of 3 (%) |
| 1                                                                                                                                                                                                                                                                                                                                                                                                                                                                                                                                                                                                                                                                                                                                                                                                                          | NiBr <sub>2</sub> ·DME                  | 67             | 92          |
| 2                                                                                                                                                                                                                                                                                                                                                                                                                                                                                                                                                                                                                                                                                                                                                                                                                          | <b>NiCl<sub>2</sub>·6H<sub>2</sub>O</b> | <b>75</b>      | <b>92</b>   |
| 3                                                                                                                                                                                                                                                                                                                                                                                                                                                                                                                                                                                                                                                                                                                                                                                                                          | NiCl <sub>2</sub> ·DME                  | 72             | 91          |
| 4                                                                                                                                                                                                                                                                                                                                                                                                                                                                                                                                                                                                                                                                                                                                                                                                                          | Ni(COD) <sub>2</sub>                    | 66             | 90          |

Reaction conditions: (1-chloroethyl)benzene (0.1 mmol), PhNH<sub>2</sub> (0.15 mmol), CO (1 atm), Ir(ppy)<sub>2</sub>(dCO<sub>2</sub>Etbpv)PF<sub>6</sub> (2 mol%), **Ni catalyst** (8 mol%), (S)-L5 (10 mol%), BnBpin (1.0 equiv.), MgBr<sub>2</sub> (1.0 equiv.), DME/EtOAc (0.1 M, v/v = 7:3), ~50 °C, 12 hours, blue LED.

**Supplementary Table S4: Effect of photocatalysts**

| Entry | Photocatalyst                                                     | yield of <b>3</b> (%) | ee of <b>3</b> (%) |
|-------|-------------------------------------------------------------------|-----------------------|--------------------|
| 1     | Ir[dF(CF <sub>3</sub> )ppy] <sub>2</sub> (dtbbpy) PF <sub>6</sub> | 67                    | 91                 |
| 2     | Ir[dFppy] <sub>2</sub> (dtbbpy)·PF <sub>6</sub>                   | 64                    | 90                 |
| 3     | <b>Ir(ppy)<sub>2</sub>(dCO<sub>2</sub>Etppy)·PF<sub>6</sub></b>   | <b>75</b>             | <b>92</b>          |
| 4     | Ir(ppy) <sub>2</sub> (dtbbpy)·PF <sub>6</sub>                     | 55                    | 90                 |
| 5     | Ir(ppy) <sub>3</sub>                                              | 29                    | 82                 |
| 6     | Ru(bpy) <sub>3</sub> ·PF <sub>6</sub>                             | 0                     | -                  |

Reaction conditions: (1-chloroethyl)benzene (0.1 mmol), PhNH<sub>2</sub> (0.15 mmol), CO (1 atm), **Photocatalyst** (2 mol%), NiCl<sub>2</sub>·6H<sub>2</sub>O (8 mol%), (*S*)-**L5** (10 mol%), BnBpin (1.0 equiv.), MgBr<sub>2</sub> (1.0 equiv.), DME/EtOAc (0.1 M, v/v = 7:3), ~50 °C, 12 hours, blue LED.

**Supplementary Table S5: Effect of additives**

|          |       |            |                                                                                                                                                                                                                                                                                    |
|----------|-------|------------|------------------------------------------------------------------------------------------------------------------------------------------------------------------------------------------------------------------------------------------------------------------------------------|
|          |       |            |                                                                                                                                                                                                                                                                                    |
| 0.1 mmol | 1 atm | 1.5 equiv. | Ir(ppy) <sub>2</sub> (dCO <sub>2</sub> Etppy)PF <sub>6</sub> (2 mol%)<br>NiCl <sub>2</sub> ·6H <sub>2</sub> O (8 mol%)<br>( <i>S</i> )- <b>L5</b> (10 mol%)<br><b>additive</b> (1.0 equiv.)<br>MgBr <sub>2</sub> (1.0 equiv.)<br>DME:EtOAc = 7:3 [0.1 M]<br>blue LEDs, 50 °C, 12 h |

| Entry | additives            | yield of 3 (%) | ee of 3 (%) |
|-------|----------------------|----------------|-------------|
| 1     | BnBpin               | 75             | 92          |
| 2     | CyBpin               | 52             | 84          |
| 3     | allylBpin            | 45             | 78          |
| 4     | CyB(OH) <sub>2</sub> | 64             | 92          |
| 5     | PhB(OH) <sub>2</sub> | 61             | 77          |

Reaction conditions: (1-chloroethyl)benzene (0.1 mmol), PhNH<sub>2</sub> (0.15 mmol), CO (1 atm), Ir(ppy)<sub>2</sub>(dCO<sub>2</sub>Et bpy)PF<sub>6</sub> (2 mol%), NiCl<sub>2</sub>·6H<sub>2</sub>O (8 mol%), (*S*)-**L5** (10 mol%), **additive** (1.0 equiv.), MgBr<sub>2</sub> (1.0 equiv.), DME/EtOAc (0.1 M, v/v = 7:3), ~50 °C, 12 hours, blue LED.

**Comment:** The BnBpin was selected as the optimal additive.

#### Supplementary Table S6: Control experiments

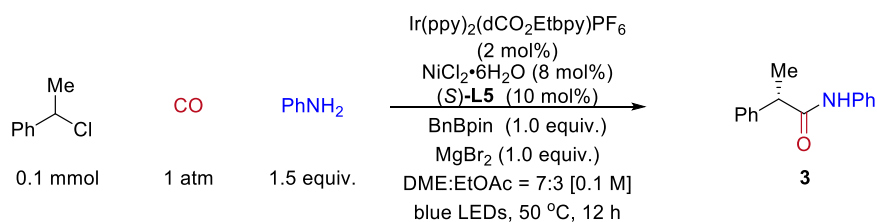

| Entry | Reaction conditions                                               | yield of 3 (%) | ee of 3 (%) |
|-------|-------------------------------------------------------------------|----------------|-------------|
| 1     | w/o Ir(ppy) <sub>2</sub> (dCO <sub>2</sub> Et bpy)PF <sub>6</sub> | 0              | -           |
| 2     | w/o NiCl <sub>2</sub> ·6H <sub>2</sub> O                          | 0              | -           |
| 3     | w/o ( <i>S</i> )- <b>L5</b>                                       | 0              | -           |
| 4     | w/o light                                                         | 0              | -           |
| 5     | w/o BnBpin                                                        | 65             | 71          |
| 6     | w/o MgBr <sub>2</sub>                                             | 68             | 86          |

Reaction conditions: (1-chloroethyl)benzene (0.1 mmol), PhNH<sub>2</sub> (0.15 mmol), CO (1 atm), Ir(ppy)<sub>2</sub>(dCO<sub>2</sub>Et bpy)PF<sub>6</sub> (2 mol%), NiCl<sub>2</sub>·6H<sub>2</sub>O (8 mol%), (*S*)-**L5** (10 mol%), BnBpin (1.0 equiv.), MgBr<sub>2</sub> (1.0 equiv.), DME/EtOAc (0.1 M, v/v = 7:3), ~50 °C, 12 hours, blue LED.

## Supplementary Figure S1: Electron paramagnetic resonance (EPR) study

We carried out paramagnetic resonance (EPR) studies by using 5,5-dimethyl-pyrroline N-oxide (DMPO) as free radical spin-trapping agent. Operando spin trapping experiments were carried out using the aniline solution (0.1 M) and DMPO (0.1 M) in anhydrous 1,4-dioxane in a capillary tube under light irradiation (blue LEDs). the radical species was dissolved into solvent to a certain concentration, then solution was drawn into the capillary tube, and the capillary tube was sealed. After that, the capillary tube was loaded into EPR tube to be measured. Such spectra were in good agreement with the simulated EPR spectroscopy of amido radical adduct **55**.

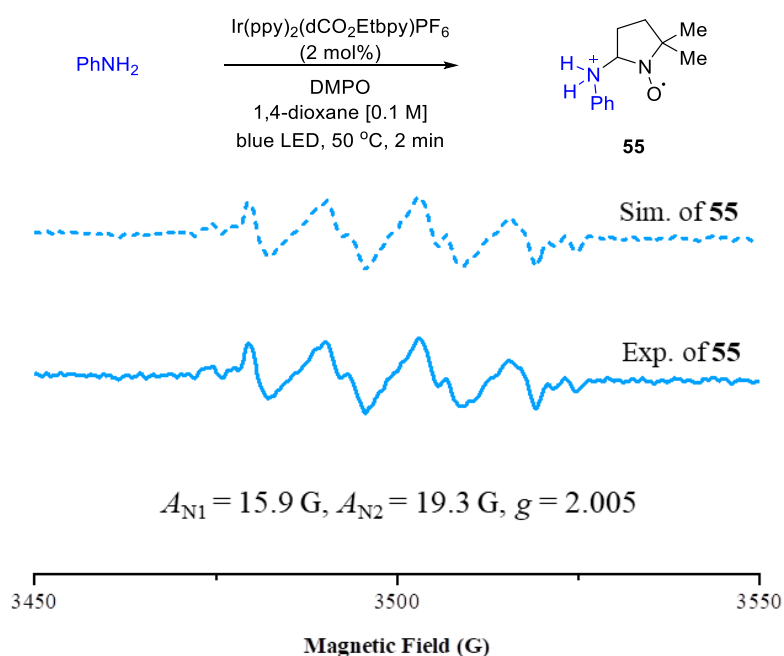

## Supplementary Figure S2: Reaction with (L4)NiCl<sub>2</sub> (A)

### Synthesis of (L4)NiCl<sub>2</sub> (A)

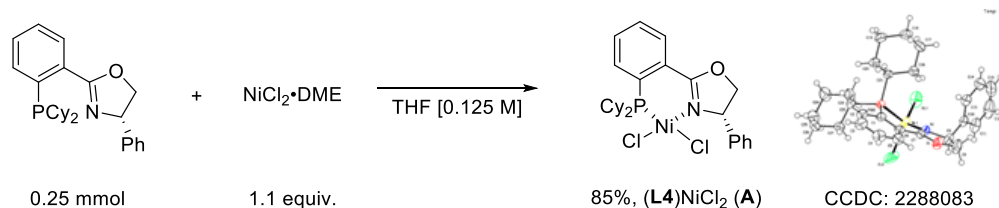

An oven-dried 8 mL vial equipped with a PTFE-coated stir bar was charged with (*S*)-**L4** (54.5 mg, 0.25 mmol, 1 equiv), NiCl<sub>2</sub>·DME (121.2 mg, 1.1 equiv) and anhydrous THF (2 mL). This reaction mixture was stirred at room temperature for 2.5 hours in an argon-filled glovebox. Dry pentane (3 mL) was added to the deep purple colored mixture and filtered. The resulting precipitate was washed with pentane and dried to afford (**L4**)NiCl<sub>2</sub> (**A**) as a purple solid (116 mg, 85% yield). The product was used without further purification. The complex was stored in a nitrogen filled glove box at -30 °C.

Note: The (**L4**)NiCl<sub>2</sub> (**A**) is paramagnetic. <sup>1</sup>H and <sup>13</sup>C NMR showed signal broadening, therefore no complete analytical characterization was possible.

Catalytic reaction with (**L4**)NiCl<sub>2</sub> (**A**)

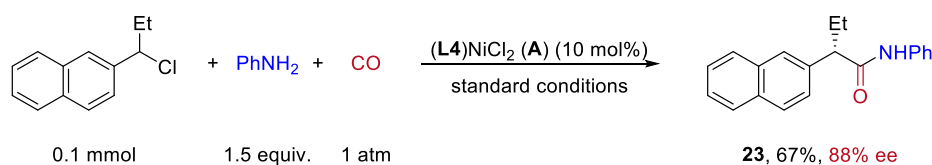

To a flame-dried 20 mL test tube was charged with 2-(1-chloropropyl)naphthalene (0.1 mmol, 1.0 equiv.), Ir(ppy)<sub>2</sub>(dCO<sub>2</sub>Etbpv)]PF<sub>6</sub> (2.0 mg, 0.002 mmol, 2 mol%), (**L4**)NiCl<sub>2</sub> (**A**) (5.5 mg, 0.01 mmol, 10 mol%), and MgBr<sub>2</sub> (18.4 mg, 0.1 mmol, 1.0 equiv.). Then the test tube was capped by rubber plug with 3M tape. After it was evacuated and backfilled with a CO balloon three times, DME /EtOAc (1 mL, v/v = 7:3) was added via a syringe, followed by the addition of with aniline (0.15 mmol), BnBPIn (22.3 μL, 0.1 mmol, 1.0 equiv.). The reaction mixture was allowed to stir for 12 hours at 50 °C by 90 W blue LEDs, and then quenched with water and extracted with EtOAc. The combined organic layers were washed by brine, dried over MgSO<sub>4</sub>, and concentrated. The residue was purified by silica gel column chromatograph to afford the product **23** (67% yield, 88% ee).

**HPLC:** The ee was determined to be 88% ee on a CHIRALPAK IA column at 254 nm, 25 °C, with hexane: *i*PrOH = 90:10 at a flow rate 1.0 mL/min. Retention times: t<sub>R</sub> (major) = 12.0 min, t<sub>R</sub> (minor) = 15.4 min.

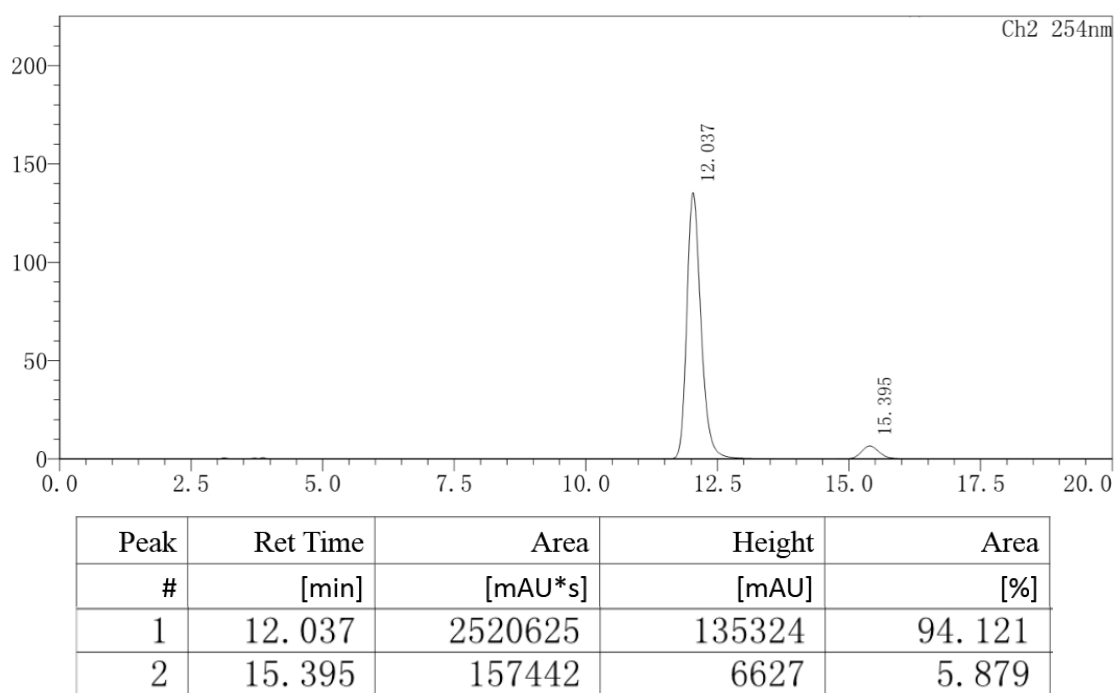

### Supplementary Figure S3: Study of nonlinear effect

To a flame-dried 10 mL test tube was charged with 2-(1-chloropropyl)naphthalene (0.1 mmol, 1.0 equiv.), Ir(ppy)<sub>2</sub>(dCO<sub>2</sub>Etbpv)PF<sub>6</sub> (2.0 mg, 0.002 mmol, 2 mol%), (*S,S*)-**L5** + (*R,R*)-**L5** (5.5 mg, 0.01 mmol, 10 mol%), and MgBr<sub>2</sub> (18.4 mg, 0.1 mmol, 1.0 equiv.). Then the test tube was capped by rubber plug with 3M tape. After it was evacuated and backfilled with a CO balloon three times, DME /EtOAc (7:3) (1 mL) was added via a syringe, followed by the addition of with aniline (0.15 mmol), BnBPIn (22.3 μL, 0.1 mmol, 1.0 equiv.). The reaction mixture was allowed to stir for 12 hours at 50 °C by 90 W blue LEDs. The ee. values of product **23** was determined by HPLC analysis.

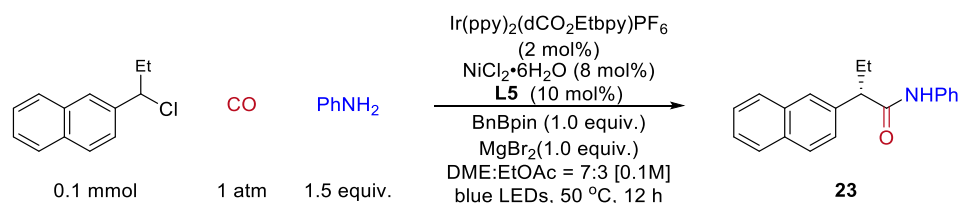

| Entry | ee of <b>L5</b> | ee of <b>23</b> |
|-------|-----------------|-----------------|
| 1     | 0%              | 0%              |

|   |     |     |
|---|-----|-----|
| 2 | 20% | 12% |
| 3 | 39% | 28% |
| 4 | 59% | 50% |
| 5 | 80% | 72% |
| 6 | 99% | 93% |

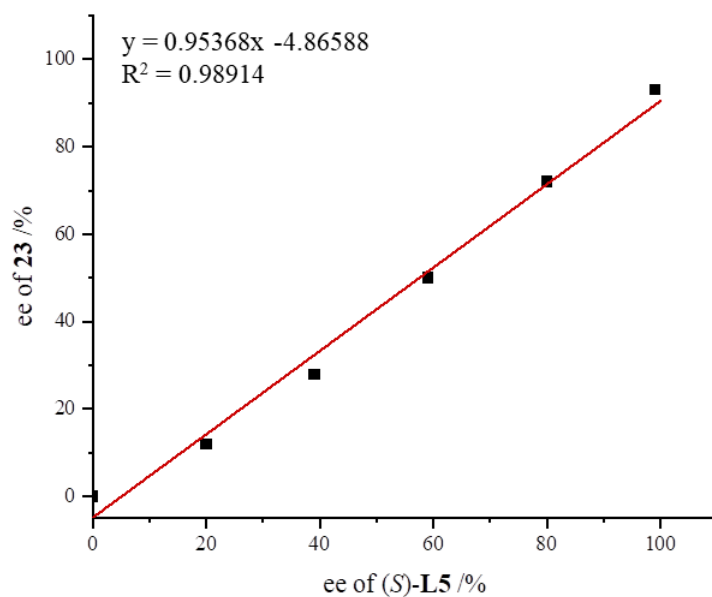

#### Supplementary Figure S4: Cyclic Voltammetry Data of **6**

Cyclic voltammetry was conducted on an Electrochemical Workstation (CHI730E) using a 3-electrode cell configuration. A glassy carbon working electrode was employed alongside a platinum wire counter electrode and an Ag/AgCl reference electrode. DMF was degassed by bubbling N<sub>2</sub> prior to measurements. 0.01 M solutions of **6** (2-(1-chloropropyl)naphthalene) were freshly prepared along with 0.1 M of tetrabutylammonium hexafluorophosphate as supporting electrolyte and were examined at a scan rate of 0.05 V. s<sup>-1</sup>.

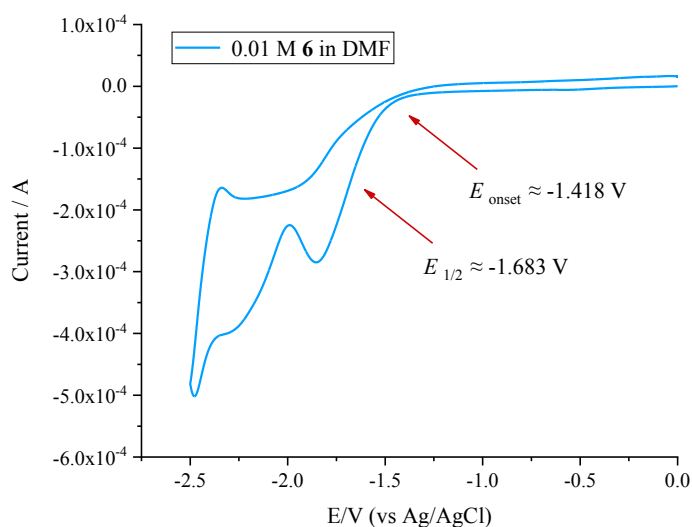

### Supplementary Figure S5: Stern-Volmer quenching experiments

Stern-Volmer quenching experiments were carried by Edinburgh Fluorescence Spectrometer FS5, using a 0.1 mM solution of photocatalyst  $\text{Ir(ppy)}_2(\text{dCO}_2\text{Etbp})\text{PF}_6$  and variable concentrations (0.5, 1.0, 1.5, 2.0, 2.5 mM) of aniline, using a 0.01 mM solution of photocatalyst  $\text{Ir(ppy)}_2(\text{dCO}_2\text{Etbp})\text{PF}_6$  and variable concentrations (0.5, 1.0, 1.5, 2.0, 2.5 mM) of 2-(1-chloropropyl)naphthalene (RCl) and  $\text{PhNH}_2$  in mixed solvent EtOAc/DME (7:3). The samples were prepared in 4 mL quartz cuvettes, equipped with PTFE stoppers, and sealed with parafilm inside nitrogen filled glove-box. The intensity of the emission peak at 637 nm ( $\lambda_{\text{ex}} = 532 \text{ nm}$ ) expressed as the ratio  $I_0/I$ , where  $I_0$  is the emission intensity of photocatalyst at 637 nm in the absence of a quencher and  $I$  is the observed intensity, as a function of the quencher concentration was measured. Stern-Volmer plots for each component are given below.



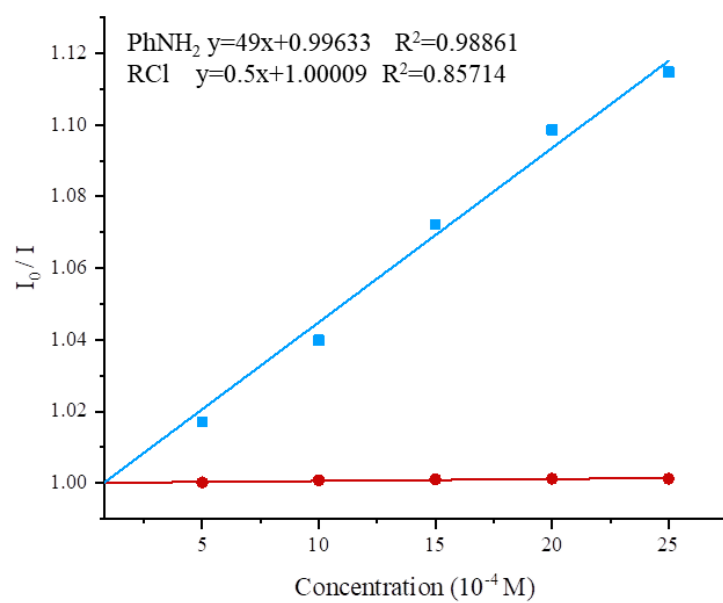

### 3. Substrate Synthesis

#### 1) Synthesis of benzyl chlorides

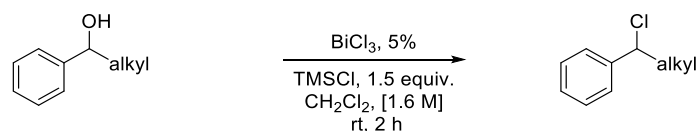

To a stirred solution of  $\text{BiCl}_3$  (5 mol%) and the benzyl alcohol (8 mmol, 1.0 equiv.) in dichloromethane (5 mL) was slowly added trimethylsilyl chloride (12 mmol, 1.5 equiv.) at room temperature. The mixture was stirred for 2 hours, and then quenched by saturated  $\text{NH}_4\text{Cl}$  solution (3 mL). The mixture was extracted with  $\text{CH}_2\text{Cl}_2$  (2\*10 mL). The collected organic layer was washed with brine (20 mL) and then dried over anhydrous  $\text{MgSO}_4$ . The solvent was evaporated under reduced pressure, and the residue was purified by flash column chromatography (silica gel, pentane with 3%  $\text{Et}_3\text{N}$ ) to give the product.<sup>1</sup>

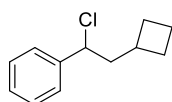

#### (1-chloro-2-cyclobutylethyl)benzene (1a)

The title compound was obtained as a colorless oil, 83% yield.

$^1\text{H NMR}$  (400 MHz,  $\text{CDCl}_3$ )  $\delta$  7.37 – 7.32 (m, 4H), 7.31 – 7.27 (m, 1H), 4.78 – 4.75 (m, 1H), 2.42 – 2.30 (m, 1H), 2.29 – 2.22 (m, 1H), 2.15 – 2.09 (m, 1H), 2.08 – 2.03 (m, 1H), 2.00 – 1.92 (m, 1H), 1.90 – 1.77 (m, 2H), 1.74 – 1.65 (m, 1H), 1.62 – 1.58 (m, 1H).

$^{13}\text{C NMR}$  (101 MHz,  $\text{CDCl}_3$ )  $\delta$  142.10, 128.71, 128.33, 127.08, 62.13, 47.26, 33.81, 28.31, 28.25, 18.79.

**HRMS** (FI):  $\text{C}_{12}\text{H}_{15}\text{Cl}$ : 194.0862, found: 194.0860.

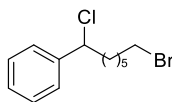

#### (7-bromo-1-chloroheptyl)benzene (1b)

The title compound was obtained as a colorless oil, 89% yield.

$^1\text{H NMR}$  (400 MHz,  $\text{CDCl}_3$ )  $\delta$  7.40 – 7.34 (m, 4H), 7.32 – 7.28 (m, 1H), 4.87 – 4.83 (m, 1H), 3.39 (t,  $J$  = 8.0 Hz, 2H), 2.18 – 2.09 (m, 1H), 2.08 – 1.99 (m, 1H), 1.88 – 1.81 (m, 2H), 1.53 – 1.49 (m, 1H), 1.47 – 1.42 (m, 2H), 1.39 – 1.31 (m, 3H).

**<sup>13</sup>C NMR** (101 MHz, CDCl<sub>3</sub>) δ 142.00, 128.76, 128.37, 127.04, 63.85, 40.00, 33.94, 32.73, 28.27, 28.05, 27.01.

**HRMS** (FI): C<sub>13</sub>H<sub>18</sub>BrCl: 288.0280, found: 288.0268.

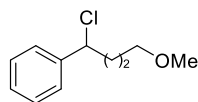

**(1-chloro-4-methoxybutyl)benzene (1c)**

The title compound was obtained as a colorless oil, 79% yield.

**<sup>1</sup>H NMR** (400 MHz, CDCl<sub>3</sub>) δ 7.40 – 7.33 (m, 4H), 7.31 – 7.27 (m, 1H), 4.91 – 4.87 (m, 1H), 3.44 – 3.36 (m, 2H), 3.32 (s, 3H), 2.24 – 2.09 (m, 2H), 1.84 – 1.73 (m, 1H), 1.66 – 1.56 (m, 1H).

**<sup>13</sup>C NMR** (101 MHz, CDCl<sub>3</sub>) δ 141.90, 128.75, 128.38, 127.07, 72.04, 63.80, 58.72, 36.96, 27.40.

**HRMS** (EI): C<sub>11</sub>H<sub>15</sub>ClO: 198.0811, found: 198.0803.

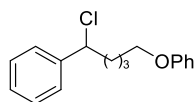

**(1-chloro-5-phenoxybutyl)benzene (1d)**

The title compound was obtained as a colorless oil, 65% yield.

**<sup>1</sup>H NMR** (400 MHz, CDCl<sub>3</sub>) δ 7.33 – 7.27 (m, 4H), 7.25 – 7.22 (m, 1H), 7.22 – 7.20 (m, 1H), 7.19 – 7.18 (m, 1H), 6.88 – 6.84 (m, 1H), 6.82 – 6.79 (m, 2H), 4.83 – 4.80 (m, 1H), 3.88 (t, *J* = 8.0 Hz, 2H), 2.19 – 2.09 (m, 1H), 2.07 – 1.98 (m, 1H), 1.79 – 1.72 (m, 2H), 1.67 – 1.56 (m, 1H), 1.47 – 1.38 (m, 1H).

**<sup>13</sup>C NMR** (101 MHz, CDCl<sub>3</sub>) δ 159.08, 141.90, 129.58, 128.80, 128.43, 127.08, 120.77, 114.63, 67.56, 63.75, 39.87, 28.83, 23.95.

**HRMS** (FI): C<sub>17</sub>H<sub>19</sub>ClO: 274.1124, found: 274.1121.

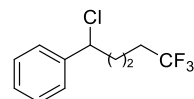

**(1-chloro-5,5,5-trifluoropentyl)benzene (1e)**

The title compound was obtained as a colorless oil, 73% yield.

**<sup>1</sup>H NMR** (400 MHz, CDCl<sub>3</sub>) δ 7.40 – 7.31 (m, 5H), 4.87 – 4.84 (m, 1H), 2.25 – 2.06 (m,

4H), 1.88 – 1.77 (m, 1H), 1.69 – 1.57 (m, 1H).

**<sup>13</sup>C NMR** (101 MHz, CDCl<sub>3</sub>) δ 141.33, 128.91, 128.65, 127.05 (q, *J* = 277.8 Hz), 126.95, 63.05, 39.01, 33.24 (q, *J* = 29.3 Hz), 19.88.

**<sup>19</sup>F NMR** (377 MHz, CDCl<sub>3</sub>) δ -66.22 (t, *J* = 12 Hz).

**HRMS** (FI): C<sub>11</sub>H<sub>12</sub>ClF<sub>3</sub> (M): 236.0580, found: 236.0578.

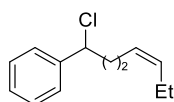

**(Z)-(1-chlorohept-4-en-1-yl)benzene (1f)**

The title compound was obtained as a colorless oil, 55% yield.

**<sup>1</sup>H NMR** (400 MHz, CDCl<sub>3</sub>) δ 7.40 – 7.34 (m, 4H), 7.33 – 7.28 (m, 1H), 5.48 – 5.42 (m, 1H), 5.34 – 5.28 (m, 1H), 4.89 – 4.85 (m, 1H), 2.25 – 2.16 (m, 3H), 2.10 – 1.98 (m, 3H), 0.96 (t, *J* = 8.0 Hz, 3H).

**<sup>13</sup>C NMR** (101 MHz, CDCl<sub>3</sub>) δ 141.94, 133.51, 128.75, 128.38, 127.11, 127.06, 63.26, 39.96, 24.81, 20.71, 14.43.

**HRMS** (EI): C<sub>13</sub>H<sub>17</sub>Cl: 208.1019, found: 208.1011.

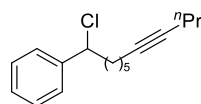

**(1-chloroundec-7-yn-1-yl)benzene (1g)**

The title compound was obtained as a colorless oil, 50% yield.

**<sup>1</sup>H NMR** (400 MHz, CDCl<sub>3</sub>) δ 7.41 – 7.35 (m, 4H), 7.33 – 7.29 (m, 1H), 4.89 – 4.86 (m, 1H), 2.21 – 2.12 (m, 5H), 2.10 – 2.01 (m, 1H), 1.57 – 1.47 (m, 6H), 1.44 – 1.30 (m, 2H), 1.00 (t, *J* = 8.0 Hz, 3H).

**<sup>13</sup>C NMR** (101 MHz, CDCl<sub>3</sub>) δ 142.02, 128.67, 128.26, 127.00, 80.35, 80.09, 63.80, 40.01, 28.95, 28.24, 26.72, 22.63, 20.85, 18.73, 13.58.

**HRMS** (FI): C<sub>17</sub>H<sub>23</sub>Cl: 262.1488, found: 262.1481.

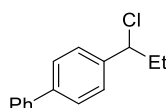

**4-(1-chloropropyl)-1,1'-biphenyl (1h)**

The title compound was obtained as a white solid, 83% yield.

**<sup>1</sup>H NMR** (400 MHz, CDCl<sub>3</sub>) δ 7.60 – 7.57 (m, 4H), 7.46 – 7.43 (m, 4H), 7.38 – 7.34 (m, 1H), 4.86 – 4.83 (m, 1H), 2.23 – 2.09 (m, 2H), 1.04 (t, *J* = 8.0 Hz, 3H).

**<sup>13</sup>C NMR** (101 MHz, CDCl<sub>3</sub>) δ 141.30, 140.91, 140.74, 128.95, 128.92, 127.58, 127.48, 127.26, 65.41, 33.30, 11.92.

**HRMS** (FI): C<sub>15</sub>H<sub>15</sub>Cl: 230.0862, found: 230.0857.

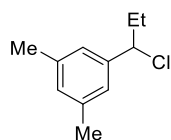

### 1-(1-chloropropyl)-3,5-dimethylbenzene (1i)

The title compound was obtained as a white solid, 83% yield.

**<sup>1</sup>H NMR** (400 MHz, CDCl<sub>3</sub>) δ 6.98 (s, 2H), 6.93 (s, 1H), 4.73 – 4.69 (m, 1H), 2.32 (s, 6H), 2.18 – 2.09 (m, 1H), 2.09 – 2.00 (m, 1H), 0.99 (t, *J* = 8.0 Hz, 3H).

**<sup>13</sup>C NMR** (101 MHz, CDCl<sub>3</sub>) δ 141.80, 138.29, 130.03, 124.89, 65.94, 33.24, 21.43, 11.98.

**HRMS** (EI): C<sub>11</sub>H<sub>15</sub>Cl: 182.0862, found: 182.0852.

## 2) Synthesis of chiral ligand

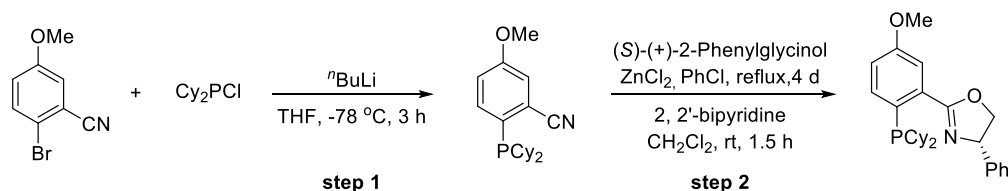

**Step 1:** To a solution of 2-bromo-5-methoxybenzonitrile (1.09 g, 6 mmol, 1.0 equiv) in anhydrous THF (11 mL), kept in an oven-dried 50 mL Schlenk, was added dropwise a solution of *n*BuLi in hexane (3.94 mL, 1.6 M in hexanes, 6.3 mmol, 1.05 eq) at -78 °C. After stirring at -78 °C for 1 hour, Cy<sub>2</sub>PCL (6 mmol, 1.0 equiv) in anhydrous THF (4 mL) was added dropwise. The solution was stirred for 1 hour at -78 °C, then allowed to warm to room temperature. Next, the solvent was evaporated under reduced pressure, and the resulting residue purified by flash column chromatography (silica gel, pentane with 3% EtOAc) to afford the product.

**Step 2:** To a solution of (*S*)-(+)-2-phenylglycinol (148 mg, 1.08 mmol, 1.20 equiv) and the product obtained in the step 1 (0.90 mmol, 1.00 equiv) in chlorobenzene (7.0 mL) was added ZnCl<sub>2</sub> (1.15 equiv) in Et<sub>2</sub>O (1.2 mL). The reaction was refluxed for 4 days at 135 °C. After cooling to room temperature, the reaction mixture was added CH<sub>2</sub>Cl<sub>2</sub> (6.0 mL) and 2,2'-bipyridine (0.9 mmol, 1.0 equiv.). The solution was stirred for 1.5 hours at room temperature, then concentrated and the residue was purified by flash column chromatography (silica gel, pentane with 6% EtOAc) to afford the chiral ligand <sup>5</sup>.

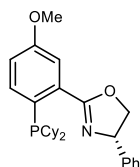

**(*S*)-2-(2-(dicyclohexylphosphanyl)-5-methoxyphenyl)-4-phenyl-4,5-dihydrooxazole (*S*)-L5**

The title compound was obtained as a white solid, 65% yield.

<sup>1</sup>H NMR (400 MHz, CDCl<sub>3</sub>) δ 7.49 – 7.43 (m, 3H), 7.38 – 7.34 (m, 2H), 7.31 – 7.26 (m, 1H), 7.21 (t, *J* = 4.0 Hz, 1H), 7.01 – 6.98 (m, 1H), 5.43 – 5.38 (m, 1H), 4.83 – 4.79 (m, 1H), 4.29 (t, *J* = 8.0 Hz, 1H), 3.84 (s, 3H), 1.88 – 1.87 (m, 4H), 1.76 – 1.75 (m, 2H), 1.66 – 1.65 (m, 3H), 1.58 – 1.49 (m, 2H), 1.35 – 1.03 (m, 11H).

<sup>13</sup>C NMR (101 MHz, CDCl<sub>3</sub>) δ 166.72, 159.67, 142.68, 138.18 (d, *J* = 31.3 Hz), 134.33, 128.69, 127.55, 127.50 (d, *J* = 25.3 Hz), 127.24, 116.51, 114.25, 74.92, 70.55, 55.49, 34.93 (d, *J* = 14 Hz), 34.67 (d, *J* = 14.1 Hz), 30.64 (d, *J* = 19.2 Hz), 30.45 (d, *J* = 16.2 Hz), 29.80, 29.70, 27.47, 27.36, 27.34, 27.23, 26.61, 26.55.

<sup>31</sup>P NMR (162 MHz, CDCl<sub>3</sub>) δ -7.76.

HRMS (ESI): C<sub>28</sub>H<sub>37</sub>NO<sub>2</sub>P<sup>+</sup> (M+H<sup>+</sup>): 450.2556, found: 450.2561.

[α]<sub>D</sub><sup>25</sup> = -32.1 (c = 0.9, CHCl<sub>3</sub>).

#### 4. General Procedure for Enantioselective Carbonylative Couplings

To a flame-dried 20 mL test tube was charged with benzyl chloride (0.1 mmol, 1.0 equiv., if solid), aniline (0.15 mmol, if solid), Ir(ppy)<sub>2</sub>(dCO<sub>2</sub>Etbpy)PF<sub>6</sub> (2.0 mg, 0.002 mmol, 2 mol%), (*S*)-**L5** (4.5 mg, 0.01 mmol, 10 mol%), NiCl<sub>2</sub>•6H<sub>2</sub>O (1.9 mg, 0.008 mmol, 8 mol%), and MgBr<sub>2</sub> (18.4 mg, 0.1 mmol, 1.0 equiv.). Then the test tube was capped by rubber plug with 3M tape. After it was evacuated and backfilled with a CO balloon three times, DME /EtOAc (1 mL, v/v = 7:3) was added via a syringe, followed by the addition of with benzyl chloride (0.1 mmol, 1.0 equiv., if liquid), aniline (0.15 mmol, if liquid), BnBpin (22.3 μL, 0.1 mmol, 1.0 equiv.). The reaction mixture was allowed to stir for 12 hours at 50 °C by 90 W blue LEDs. Upon completion, the reaction mixture was diluted with EtOAc (10 mL) and transferred to a separatory funnel. The organic layer was washed with brine (2×10 mL). The organic layer was dried over MgSO<sub>4</sub>, filtered, and concentrated under reduced pressure. The resultant crude residue was purified by flash column chromatography to give the products.

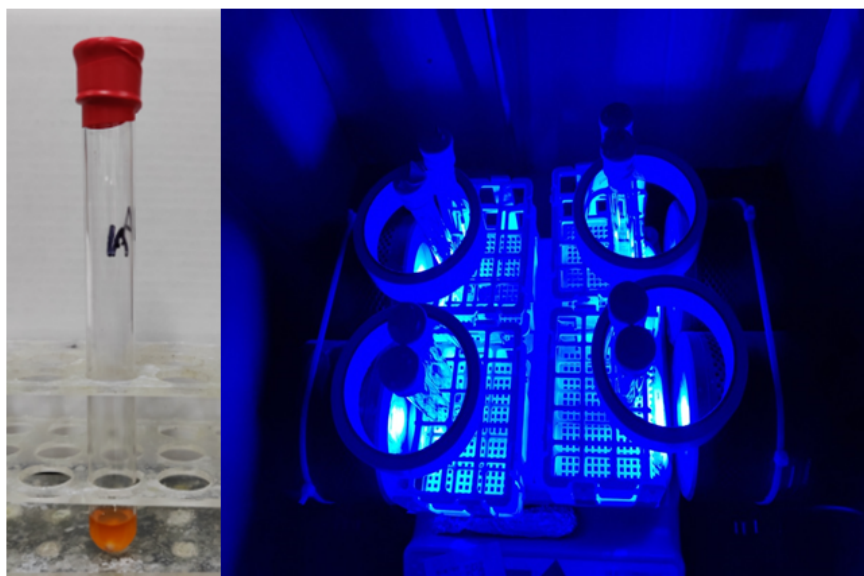

**Supplementary Figure S6** Reaction Setup for the enantioselective carbonylative coupling

## 5. Characterization of Products

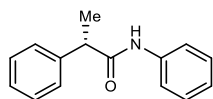

### (*S*)-*N*,2-diphenylpropanamide (**3**)<sup>6</sup>

According to **General Procedure**, the title compound was isolated by flash column chromatography (silica gel, pentane with 9% EtOAc) as a white solid (16.9 mg, 75%, 92% ee).

<sup>1</sup>H NMR (400 MHz, CDCl<sub>3</sub>) δ 7.34 (d, *J* = 8.0 Hz, 2H), 7.28 -7.27(m 3H), 7.24 – 7.15 (m, 4H), 6.97 (t, *J* = 8.0 Hz, 1H), 3.63 (q, *J* = 8.0 Hz, 1H), 1.50 (d, *J* = 8.0 Hz, 3H).

<sup>13</sup>C NMR (101 MHz, CDCl<sub>3</sub>) δ 172.54, 141.03, 137.97, 129.20, 128.99, 127.78, 127.63, 124.33, 119.86, 48.10, 18.68.

[α]<sub>D</sub><sup>25</sup> = 41.3 (c = 0.71, CHCl<sub>3</sub>).

**HPLC:** The ee was determined to be 92% on a CHIRALPAK IA column at 254 nm, 25 °C, with hexane: *i*PrOH = 90:10 at a flow rate 1.0 mL/min. Retention times: *t*<sub>R</sub> (major) = 9.3 min, *t*<sub>R</sub> (minor) = 11.0 min.

### **3 racemic**

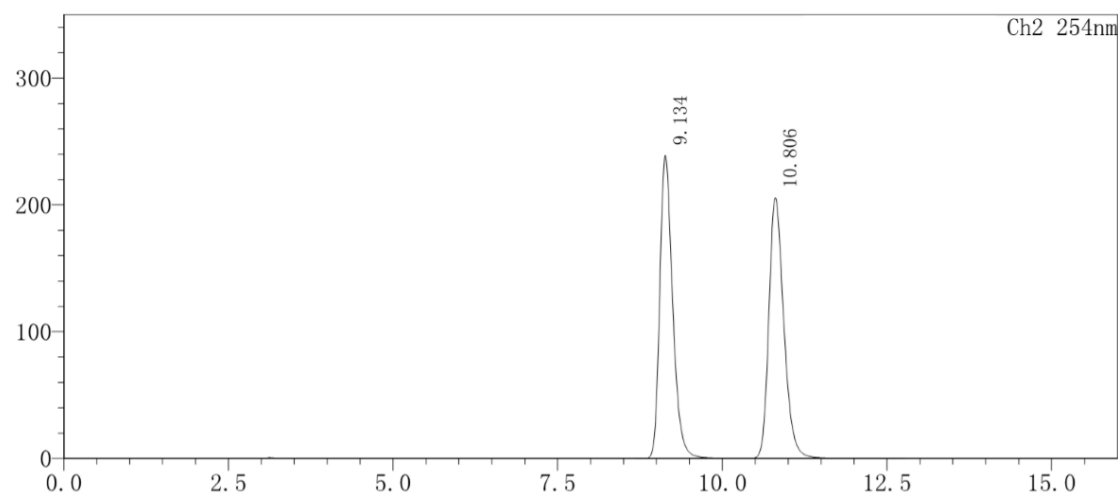

| Peak # | Ret Time [min] | Area [mAU*s] | Height [mAU] | Area [%] |
|--------|----------------|--------------|--------------|----------|
| 1      | 9.134          | 3259914      | 239322       | 49.989   |
| 2      | 10.806         | 3261314      | 205730       | 50.011   |



### 3 enantioenriched, 92% ee

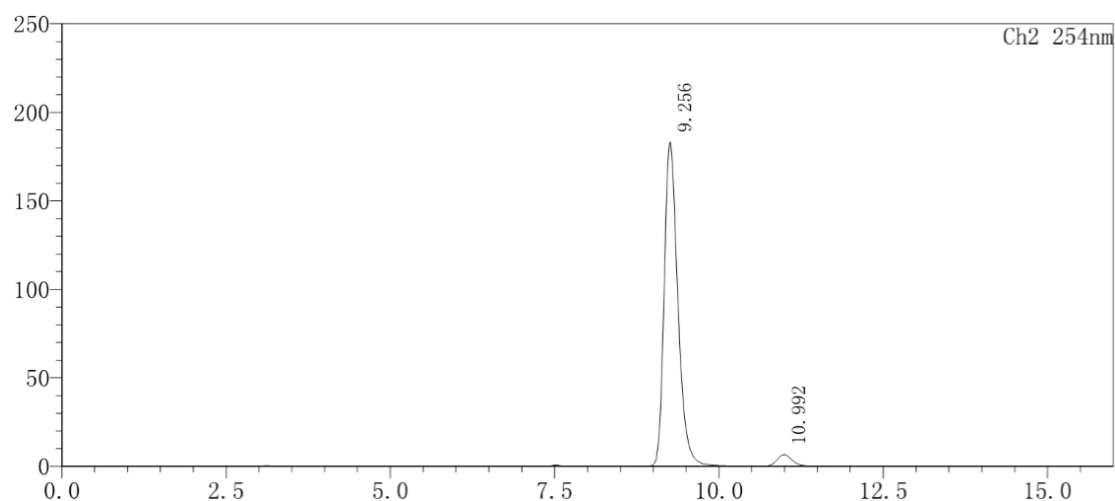

| Peak # | Ret Time [min] | Area [mAU*s] | Height [mAU] | Area [%] |
|--------|----------------|--------------|--------------|----------|
| 1      | 9.256          | 2660415      | 183337       | 96.020   |
| 2      | 10.992         | 110262       | 6663         | 3.980    |

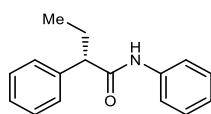

#### (S)-N,2-diphenylbutanamide (8) <sup>7</sup>

According to **General Procedure**, the title compound was isolated by flash column chromatography (silica gel, pentane with 6% EtOAc) as a white solid (17.4 mg, 73%, 93% ee).

**<sup>1</sup>H NMR** (400 MHz, CDCl<sub>3</sub>)  $\delta$  7.48–7.46 (m, 2H), 7.39–7.35 (m, 4H), 7.35–7.28 (m, 3H), 7.08 (t,  $J$  = 8.0 Hz, 1H), 3.43 (t,  $J$  = 8.0 Hz, 1H), 2.35–2.24 (m, 1H), 1.95–1.84 (m, 1H), 0.95 (t,  $J$  = 8.0 Hz, 3H).

**<sup>13</sup>C NMR** (101 MHz, CDCl<sub>3</sub>)  $\delta$  171.90, 139.65, 138.01, 129.09, 129.01, 128.17, 127.59, 124.35, 119.91, 56.23, 26.54, 12.46.

$[\alpha]_D^{25}$  = 51.5 (c = 1.01, CHCl<sub>3</sub>).

**HPLC**: The ee was determined to be 93% on a CHIRALPAK IA column at 254 nm, 25 °C, with hexane: *i*PrOH = 90:10 at a flow rate 1.0 mL/min. Retention times:  $t_R$  (major) = 8.6 min,  $t_R$  (minor) = 10.2 min.

### 8 racemic

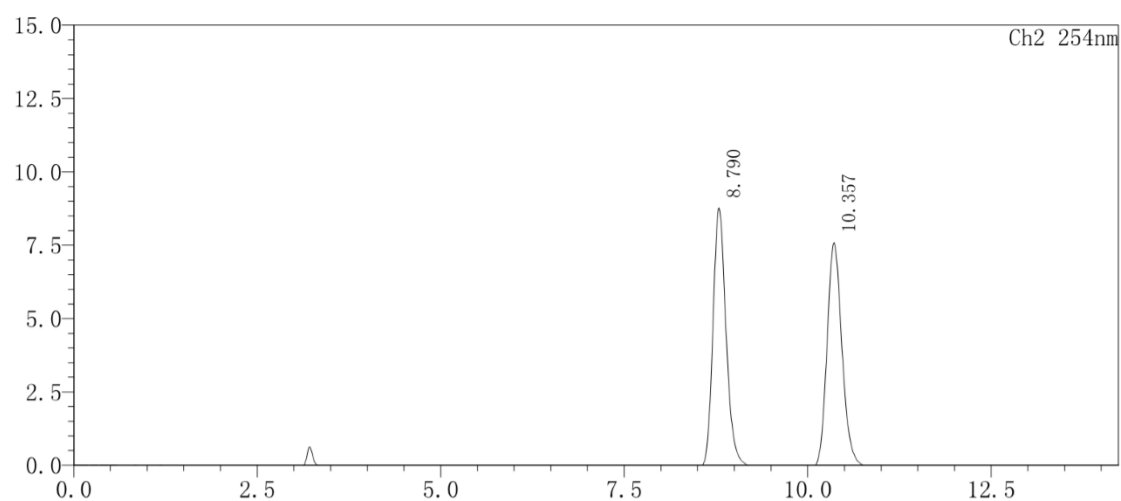

| Peak # | Ret Time [min] | Area [mAU*s] | Height [mAU] | Area [%] |
|--------|----------------|--------------|--------------|----------|
| 1      | 8.790          | 113165       | 8887         | 50.338   |
| 2      | 10.357         | 111647       | 7712         | 49.662   |

### 8 enantioenriched, 93% ee

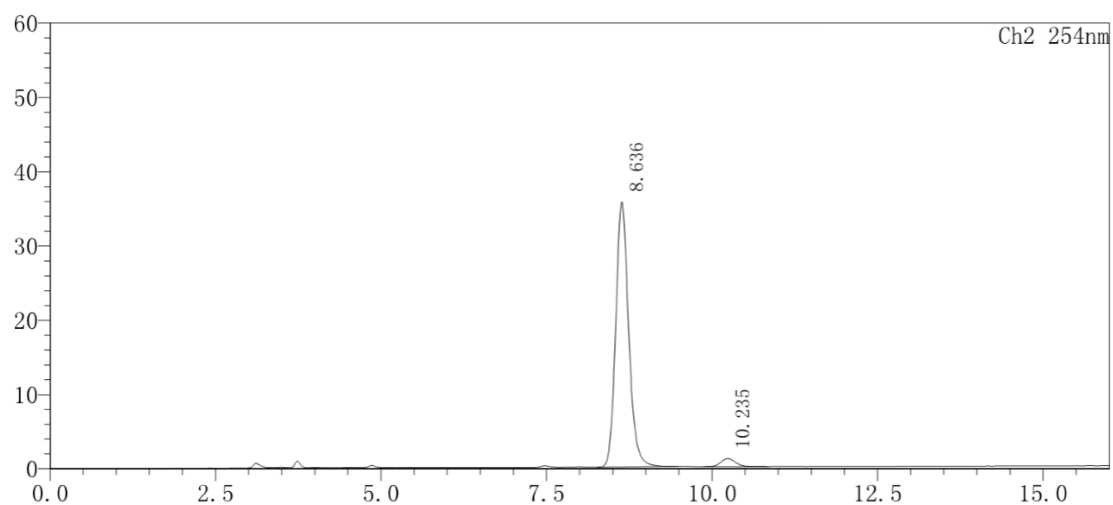

| Peak # | Ret Time [min] | Area [mAU*s] | Height [mAU] | Area [%] |
|--------|----------------|--------------|--------------|----------|
| 1      | 8.636          | 488083       | 35728        | 96.638   |
| 2      | 10.235         | 16978        | 1076         | 3.362    |

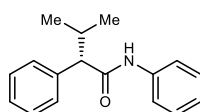

**(S)-3-methyl-N,2-diphenylbutanamide (9)** <sup>8</sup>

According to **General Procedure**, the title compound was isolated by flash column chromatography (silica gel, pentane with 6% EtOAc) as a white solid (18.2 mg, 72%, 93% ee).

**<sup>1</sup>H NMR** (400 MHz, CDCl<sub>3</sub>) δ 7.47 (d, *J* = 8.0 Hz, 2H), 7.40 – 7.38 (m, 2H), 7.33 (t, *J* = 8.0 Hz, 2H), 7.29 – 7.25 (m, 3H), 7.22 (s, 1H), 7.07 (t, *J* = 8.0 Hz, 1H), 2.99 (d, *J* = 12.0 Hz, 1H), 2.58 – 2.47 (m, 1H), 1.12 (d, *J* = 4.0 Hz, 3H), 0.75 (d, *J* = 8.0 Hz, 3H).

**<sup>13</sup>C NMR** (101 MHz, CDCl<sub>3</sub>) δ 171.74, 139.05, 138.02, 129.05, 128.80, 128.45, 127.47, 124.39, 119.97, 63.08, 31.75, 21.86, 20.50.

[α]<sub>D</sub><sup>25</sup> = 38.2 (c = 0.92, CHCl<sub>3</sub>).

**HPLC**: The ee was determined to be 93% on a CHIRALPAK IA column at 254 nm, 25 °C, with hexane: *i*-PrOH = 90:10 at a flow rate 1.0 mL/min. Retention times: *t*<sub>R</sub> (major) = 7.6 min, *t*<sub>R</sub> (minor) = 10.2 min.

### 9 racemic

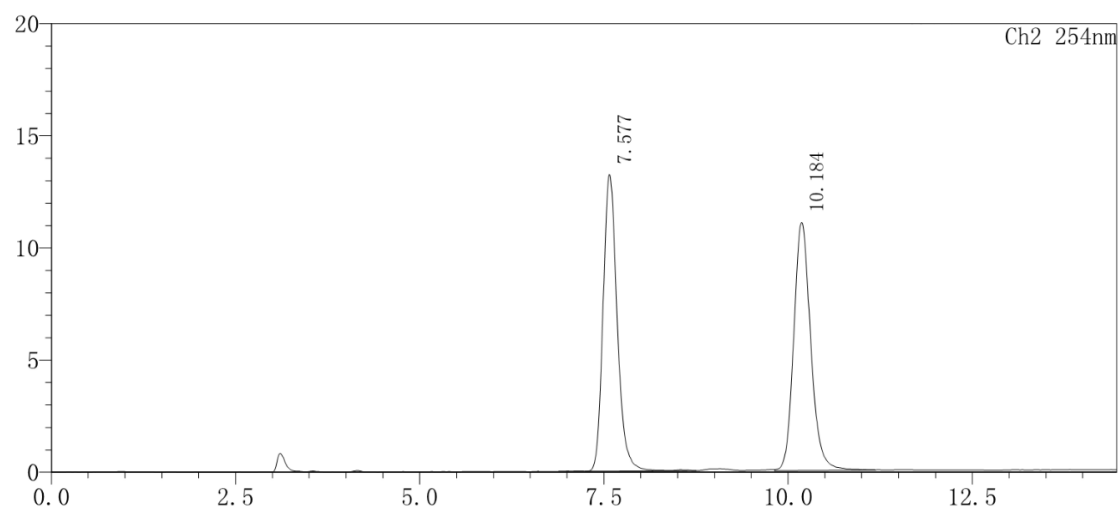

| Peak # | Ret Time [min] | Area [mAU*s] | Height [mAU] | Area [%] |
|--------|----------------|--------------|--------------|----------|
| 1      | 7.577          | 176315       | 13242        | 49.796   |
| 2      | 10.184         | 177761       | 11069        | 50.204   |

## 9 enantioenriched, 93% ee

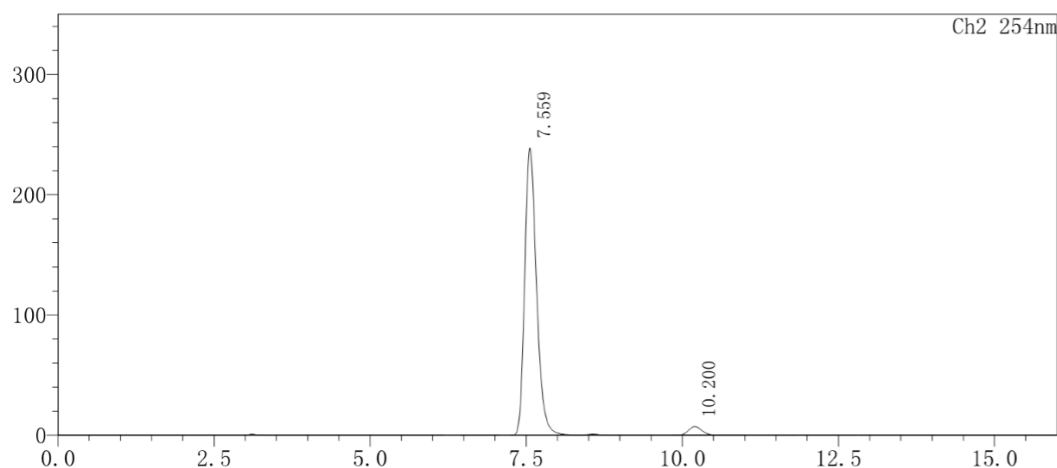

| Peak # | Ret Time [min] | Area [mAU*s] | Height [mAU] | Area [%] |
|--------|----------------|--------------|--------------|----------|
| 1      | 7.559          | 3148734      | 239282       | 96.355   |
| 2      | 10.200         | 119110       | 7442         | 3.645    |

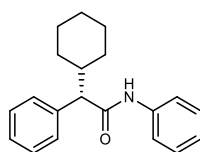

### (S)-2-cyclohexyl-N,2-diphenylacetamide (10)<sup>9</sup>

According to **General Procedure**, the title compound was isolated by flash column chromatography (silica gel, pentane with 5% EtOAc) as a white solid (13.8 mg, 47%, 90% ee).

**<sup>1</sup>H NMR** (400 MHz, CDCl<sub>3</sub>)  $\delta$  7.48 (d,  $J$  = 8.0 Hz, 2H), 7.40 – 7.38 (m, 3H), 7.32 (t,  $J$  = 8.0 Hz, 2H), 7.28 – 7.24 (m, 3H), 7.06 (t,  $J$  = 8.0 Hz, 1H), 3.08 (d,  $J$  = 8.0 Hz, 1H), 2.24 – 2.14 (m, 1H), 2.01 (d,  $J$  = 12 Hz, 1H), 1.74 – 1.71 (m, 1H), 1.66 – 1.62 (m, 2H), 1.38 – 1.33 (m, 2H), 1.20 – 1.01 (m, 3H), 0.81 – 0.73 (m, 1H).

**<sup>13</sup>C NMR** (101 MHz, CDCl<sub>3</sub>)  $\delta$  171.72, 138.61, 138.02, 129.02, 128.74, 128.53, 127.37, 124.36, 119.98, 61.95, 40.94, 32.41, 30.79, 26.52, 26.22.

$[\alpha]_D^{25}$  = 42.1 ( $c$  = 0.83, CHCl<sub>3</sub>).

**HPLC**: The ee was determined to be 90% on a CHIRALPAK IA column at 254 nm, 25 °C, with hexane: *i*-PrOH = 90:10 at a flow rate 1.0 mL/min. Retention times:  $t_R$  (major) = 8.9 min,  $t_R$  (minor) = 11.2 min.

### 10 racemic

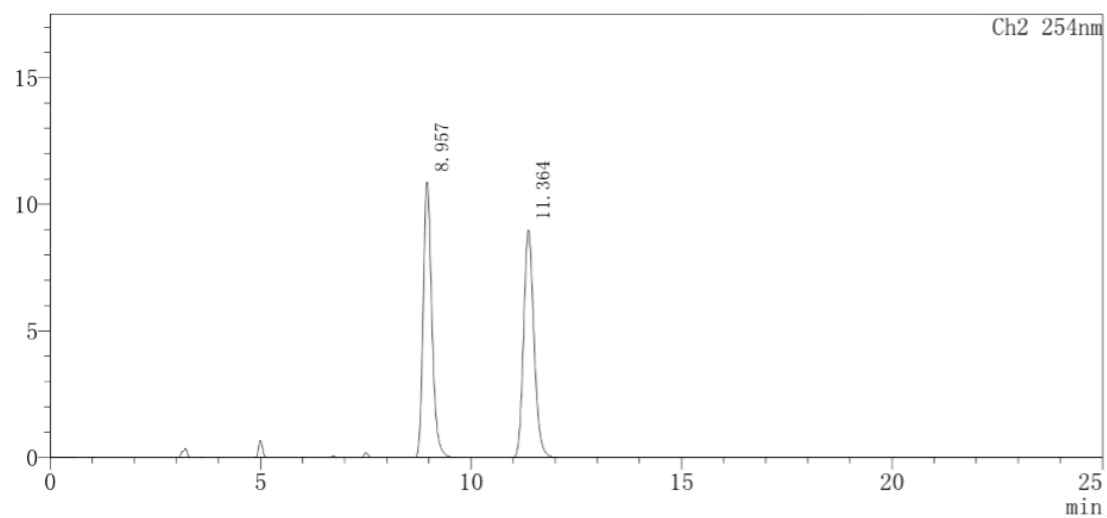

| Peak | Ret Time | Area    | Height | Area   |
|------|----------|---------|--------|--------|
| #    | [min]    | [mAU*s] | [mAU]  | [%]    |
| 1    | 8.957    | 158473  | 10958  | 49.980 |
| 2    | 11.364   | 158599  | 9041   | 50.020 |

### 10 enantioenriched, 90% ee

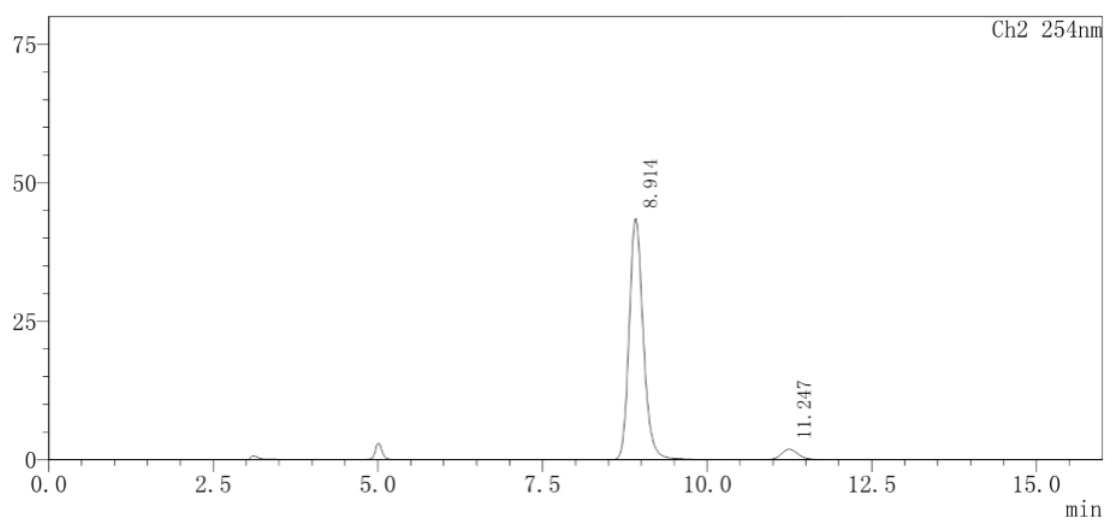

| Peak | Ret Time | Area    | Height | Area   |
|------|----------|---------|--------|--------|
| #    | [min]    | [mAU*s] | [mAU]  | [%]    |
| 1    | 8.914    | 648130  | 43549  | 95.160 |
| 2    | 11.247   | 32962   | 1883   | 4.840  |

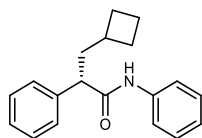

**(S)-3-cyclobutyl-N,2-diphenylpropanamide (11)**<sup>10</sup>

According to **General Procedure**, the title compound was isolated by flash column chromatography (silica gel, pentane with 6% EtOAc) as a white solid (19.0 mg, 68%, 92% ee).

**<sup>1</sup>H NMR** (400 MHz, CDCl<sub>3</sub>) δ 7.41 (d, *J* = 8.0 Hz, 2H), 7.35 – 7.32 (m, 4H), 7.28 – 7.26 (m, 1H), 7.24 – 7.22 (m, 2H), 7.13 (s, 1H), 7.04 (t, *J* = 8.0 Hz, 1H), 3.40 (t, *J* = 8.0 Hz, 1H), 2.34 – 2.27 (m, 1H), 2.23 – 2.15 (m, 1H), 2.03 – 1.87 (m, 3H), 1.81 – 1.71 (m, 2H), 1.69 – 1.62 (m, 1H), 1.60 – 1.53 (m, 1H).

**<sup>13</sup>C NMR** (101 MHz, CDCl<sub>3</sub>) δ 171.86, 139.79, 138.01, 129.10, 129.03, 128.16, 127.59, 124.34, 119.85, 52.47, 40.40, 34.17, 28.43, 28.13, 18.53.

[α]<sub>D</sub><sup>25</sup> = 33.7 (c = 0.62, CHCl<sub>3</sub>).

**HPLC**: The ee was determined to be 92% on a CHIRALPAK IA column at 254 nm, 25 °C, with hexane: *i*PrOH = 90:10 at a flow rate 1.0 mL/min. Retention times: *t*<sub>R</sub> (major) = 9.1 min, *t*<sub>R</sub> (minor) = 11.1 min.

**11 racemic**

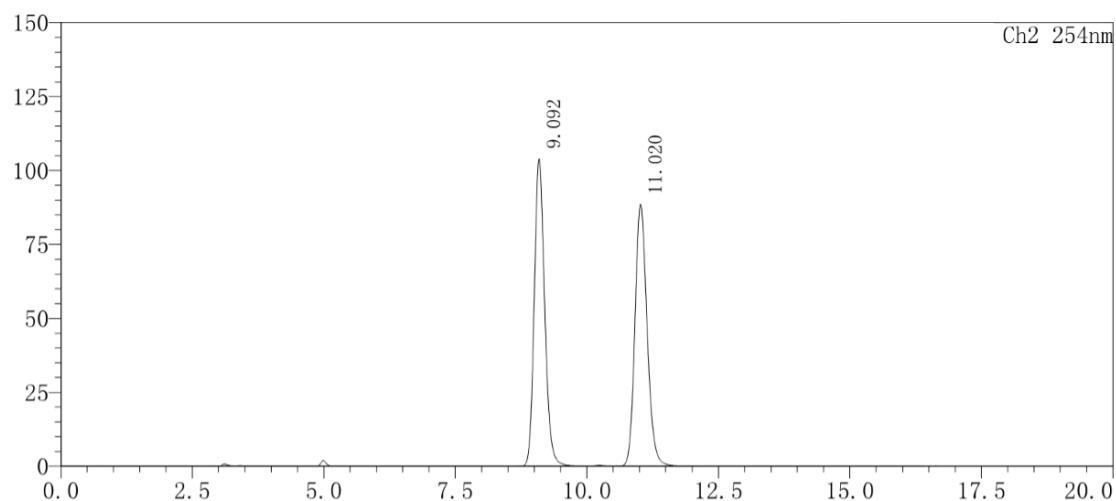

| Peak # | Ret Time [min] | Area [mAU*s] | Height [mAU] | Area [%] |
|--------|----------------|--------------|--------------|----------|
| 1      | 9.092          | 1438151      | 104029       | 50.106   |
| 2      | 11.020         | 1432049      | 88619        | 49.894   |

### 11 enantioenriched, 92% ee

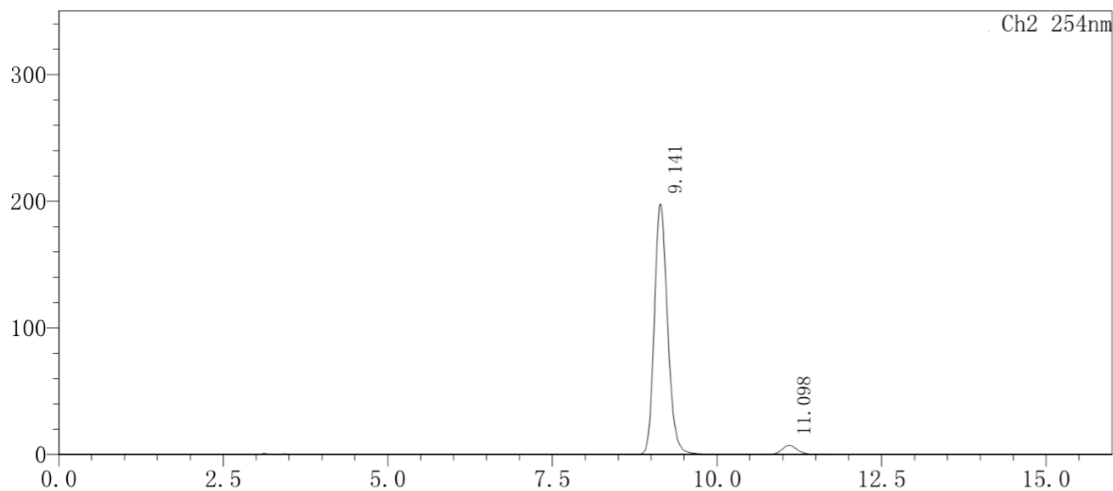

| Peak # | Ret Time [min] | Area [mAU*s] | Height [mAU] | Area [%] |
|--------|----------------|--------------|--------------|----------|
| 1      | 9.141          | 2772493      | 197999       | 95.951   |
| 2      | 11.098         | 116995       | 7202         | 4.049    |

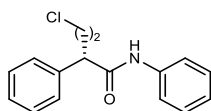

### (S)-4-chloro-N,2-diphenylbutanamide (12)<sup>11</sup>

According to **General Procedure**, the title compound was isolated by flash column chromatography (silica gel, pentane with 9% EtOAc) as a white solid (21.3 mg, 78%, 93% ee).

**<sup>1</sup>H NMR** (400 MHz, CDCl<sub>3</sub>) δ 7.40 – 7.34(m, 5H), 7.32 – 7.22 (m, 4H), 7.14 (s, 1H), 7.04 (t, *J* = 8.0 Hz, 1H), 3.83 (t, *J* = 8.0 Hz, 1H), 3.63 – 3.57 (m, 1H), 3.42 – 3.36 (m, 1H), 2.69 – 2.60 (m, 1H), 2.25 – 2.17 (m, 1H).

**<sup>13</sup>C NMR** (101 MHz, CDCl<sub>3</sub>) δ 170.79, 138.40, 137.79, 129.41, 129.09, 128.26, 128.10, 124.59, 119.95, 50.63, 43.23, 35.86.

[α]<sub>D</sub><sup>25</sup> = 47.2 (c = 1.07, CHCl<sub>3</sub>).

**HPLC**: The ee was determined to be 93% on a CHIRALPAK IA column at 254 nm, 25 °C, with hexane: *i*PrOH = 90:10 at a flow rate 1.0 mL/min. Retention times: *t*<sub>R</sub> (major) = 9.8 min, *t*<sub>R</sub> (minor) = 11.0 min.

## 12 racemic

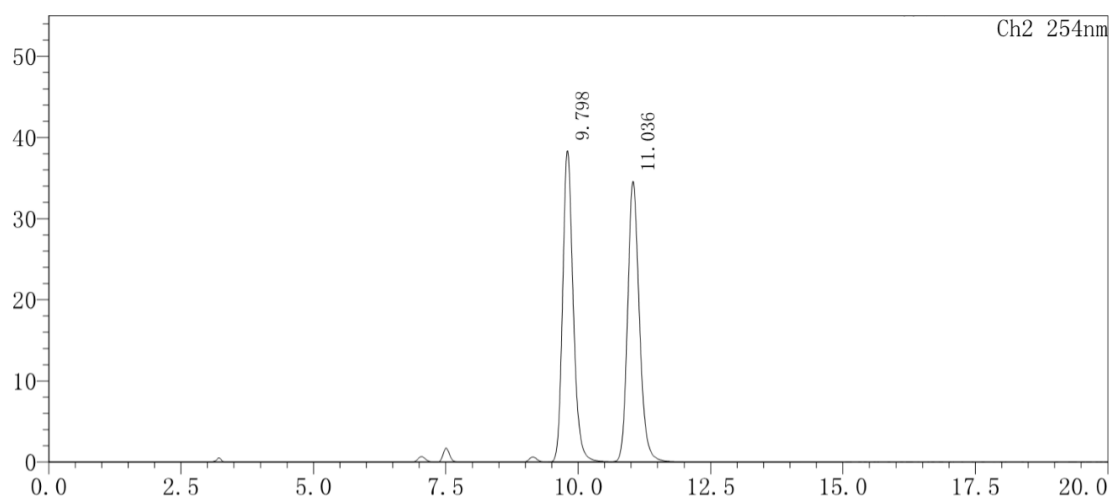

| Peak # | Ret Time [min] | Area [mAU*s] | Height [mAU] | Area [%] |
|--------|----------------|--------------|--------------|----------|
| 1      | 9.798          | 532852       | 38400        | 49.901   |
| 2      | 11.036         | 534960       | 34580        | 50.099   |

## 12 enantioenriched, 93% ee

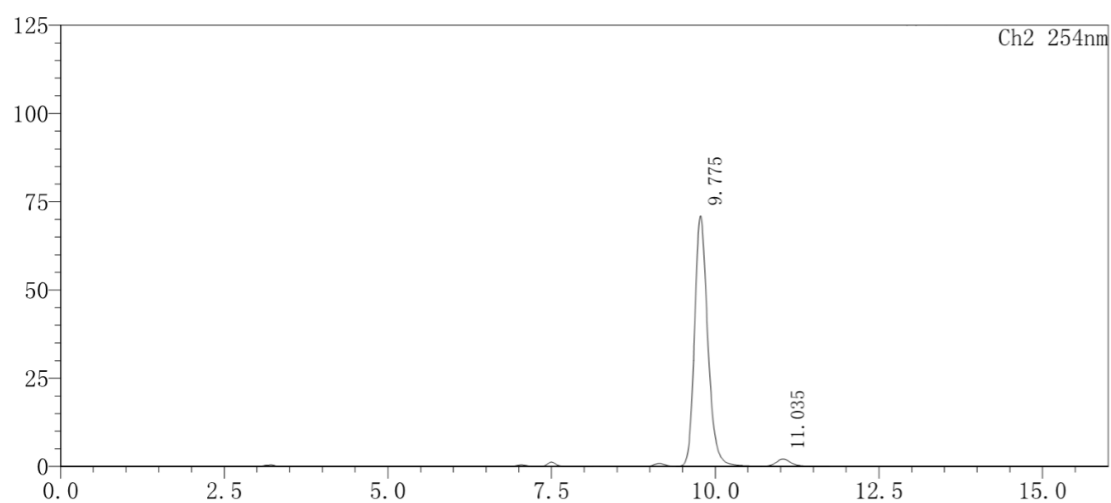

| Peak # | Ret Time [min] | Area [mAU*s] | Height [mAU] | Area [%] |
|--------|----------------|--------------|--------------|----------|
| 1      | 9.775          | 1002305      | 71035        | 96.669   |
| 2      | 11.035         | 34534        | 2093         | 3.331    |

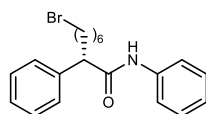

## (S)-8-bromo-N,2-diphenyloctanamide (13)

According to **General Procedure**, the title compound was isolated by flash column



chromatography (silica gel, pentane with 8% EtOAc) as a white solid (23.9 mg, 64%, 92% ee).

**$^1\text{H}$  NMR** (400 MHz,  $\text{CDCl}_3$ )  $\delta$  7.37 – 7.35 (m, 2H), 7.31 – 7.25 (m, 4H), 7.24 – 7.17 (m, 3H), 7.10 (s, 1H), 6.99 (t,  $J$  = 8.0 Hz, 1H), 3.40 (t,  $J$  = 8.0 Hz, 1H), 3.29 (t,  $J$  = 8.0 Hz, 2H), 2.20 – 2.12 (m, 1H), 1.80 – 1.70 (m, 3H), 1.32 – 1.15 (m, 6H).

**$^{13}\text{C}$  NMR** (101 MHz,  $\text{CDCl}_3$ )  $\delta$  171.68, 139.62, 137.85, 129.09, 128.94, 128.00, 127.58, 124.29, 119.75, 54.40, 33.94, 33.11, 32.69, 28.61, 27.95, 27.56.

**HRMS** (ESI):  $\text{C}_{20}\text{H}_{25}\text{BrNO}^+$  ( $\text{M}+\text{H}^+$ ): 374.1114, found: 374.1110.

$[\alpha]_{\text{D}}^{25} = 52.1$  ( $c = 1.02$ ,  $\text{CHCl}_3$ ).

**HPLC**: The ee was determined to be 92% on a CHIRALPAK IA column at 254 nm, 25 °C, with hexane:  $i$ -PrOH = 90:10 at a flow rate 1.0 mL/min. Retention times:  $t_{\text{R}}$  (major) = 12.8 min,  $t_{\text{R}}$  (minor) = 14.9 min.

### 13 racemic

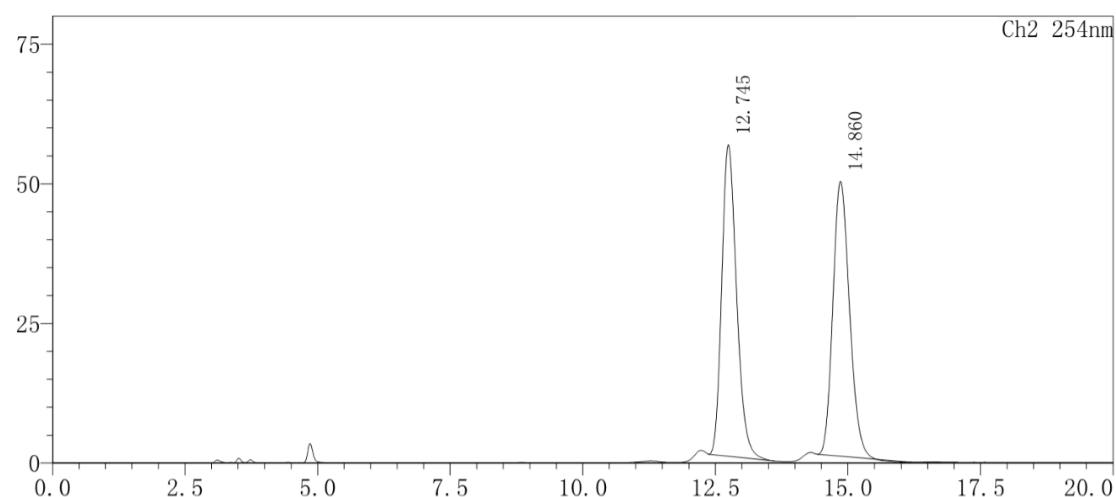

| Peak # | Ret Time [min] | Area [mAU*s] | Height [mAU] | Area [%] |
|--------|----------------|--------------|--------------|----------|
| 1      | 12.745         | 1087552      | 55748        | 50.367   |
| 2      | 14.860         | 1071715      | 49242        | 49.633   |

### 13 enantioenriched, 92% ee

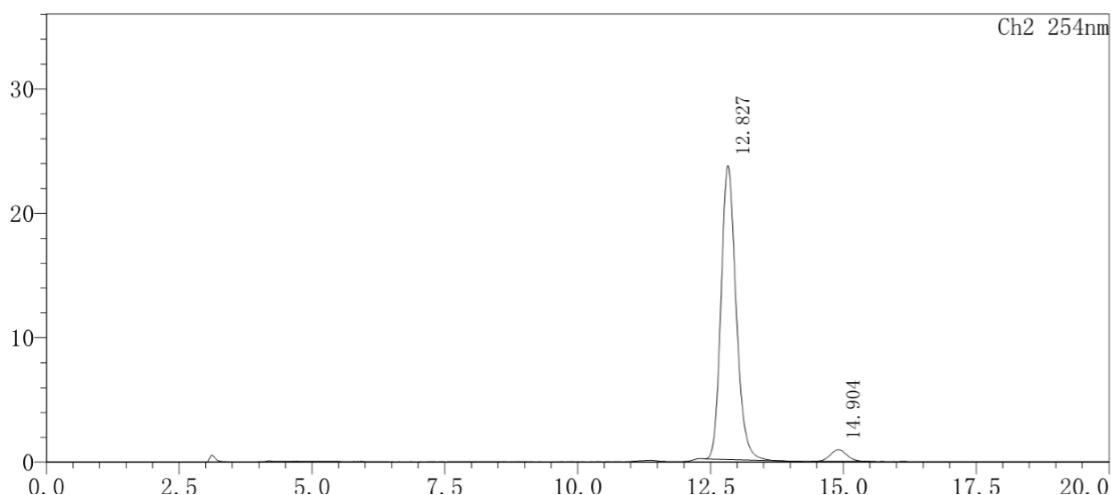

| Peak # | Ret Time [min] | Area [mAU*s] | Height [mAU] | Area [%] |
|--------|----------------|--------------|--------------|----------|
| 1      | 12.827         | 467011       | 23616        | 95.857   |
| 2      | 14.904         | 20186        | 920          | 4.143    |

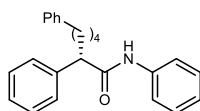

#### (S)-N,2,6-triphenylhexanamide (14)

According to **General Procedure**, the title compound was isolated by flash column chromatography (silica gel, pentane with 6% EtOAc) as a white solid (26.1 mg, 76%, 92% ee).

**<sup>1</sup>H NMR** (400 MHz, CDCl<sub>3</sub>) δ 7.34 (d, *J* = 8.0 Hz, 2H), 7.27 – 7.24 (m, 3H), 7.23 – 7.15 (m, 5H), 7.09 – 7.04 (m, 4H), 6.98 (t, *J* = 8.0 Hz, 1H), 3.37 (t, *J* = 8.0 Hz, 1H), 2.49 (t, *J* = 8.0 Hz, 2H), 2.24 – 2.15 (m, 1H), 1.83 – 1.73 (m, 1H), 1.62 – 1.57 (m, 1H), 1.55 – 1.48 (m, 1H), 1.36 – 1.26 (m, 1H), 1.25 – 1.19 (m, 1H).

**<sup>13</sup>C NMR** (101 MHz, CDCl<sub>3</sub>) δ 171.84, 142.62, 139.77, 137.97, 129.16, 129.03, 128.49, 128.38, 128.11, 127.64, 125.77, 124.39, 119.89, 54.45, 35.78, 33.21, 31.41, 27.48.

**HRMS** (ESI): C<sub>24</sub>H<sub>26</sub>NO<sup>+</sup> (*M*+H<sup>+</sup>): 344.2009, found: 344.2004.

[α]<sub>D</sub><sup>25</sup> = 29.3 (c = 0.51, CHCl<sub>3</sub>).

**HPLC**: The ee was determined to be 92% on a CHIRALPAK IA column at 254 nm, 25 °C, with hexane: *i*-PrOH = 90:10 at a flow rate 1.0 mL/min. Retention times: *t*<sub>R</sub> (major) = 11.0 min, *t*<sub>R</sub> (minor) = 12.7 min.

### 14 racemic

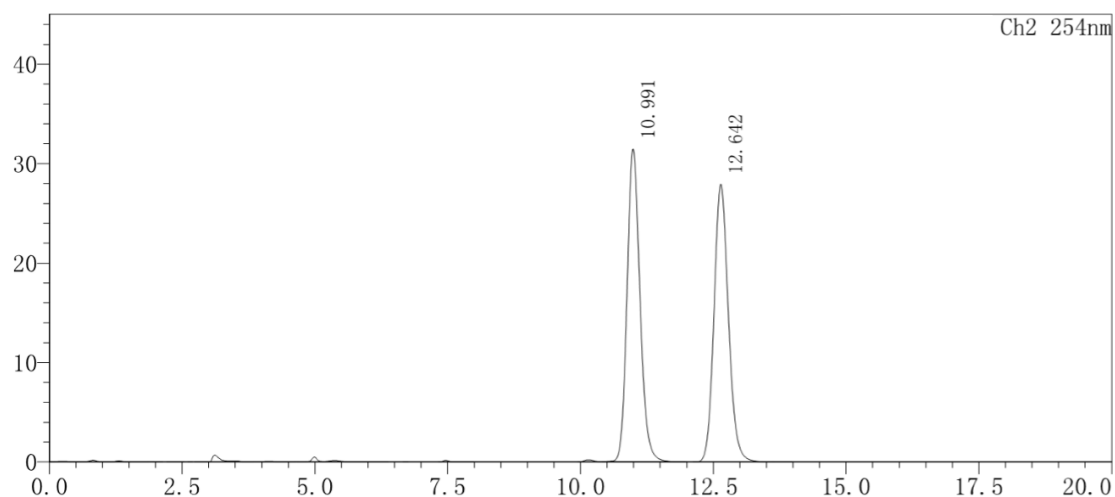

| Peak # | Ret Time [min] | Area [mAU*s] | Height [mAU] | Area [%] |
|--------|----------------|--------------|--------------|----------|
| 1      | 10.991         | 536114       | 31491        | 50.246   |
| 2      | 12.642         | 530873       | 27972        | 49.754   |

### 14 enantioenriched, 92% ee

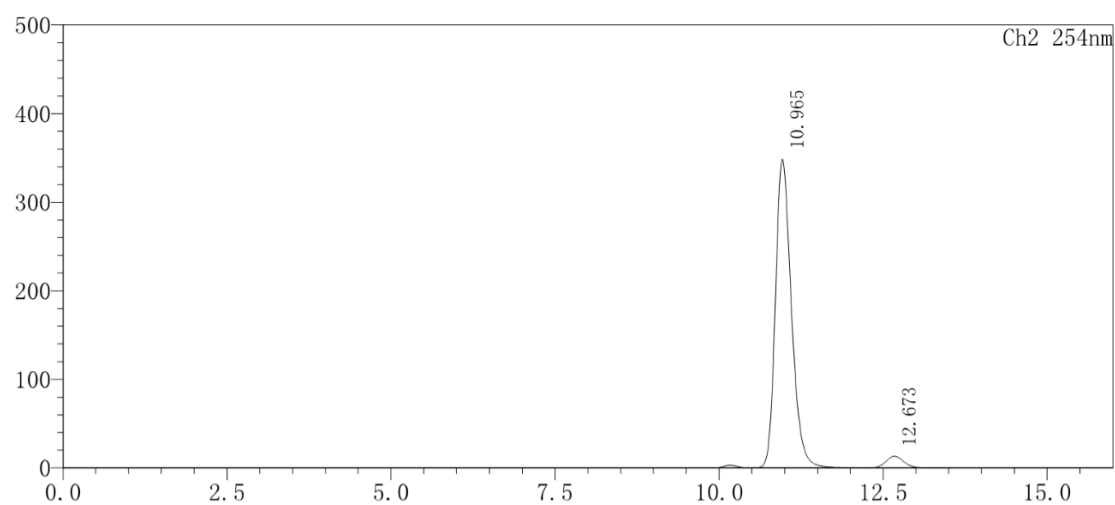

| Peak # | Ret Time [min] | Area [mAU*s] | Height [mAU] | Area [%] |
|--------|----------------|--------------|--------------|----------|
| 1      | 10.965         | 5908150      | 348749       | 95.873   |
| 2      | 12.673         | 254316       | 13218        | 4.127    |

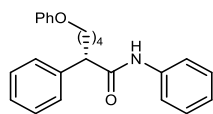

**(S)-6-phenoxy-N,2-diphenylhexanamide (15)**

According to **General Procedure**, the title compound was isolated by flash column chromatography (silica gel, pentane with 6% EtOAc) as a white solid (25.1 mg, 70%, 92% ee).

**<sup>1</sup>H NMR** (400 MHz, CDCl<sub>3</sub>) δ 7.34 – 7.32 (m, 2H), 7.27 – 7.26 (m, 4H), 7.22 – 7.14 (m, 5H), 7.08 (s, 1H), 6.97 (t, *J* = 8.0 Hz, 1H), 6.82 (t, *J* = 8.0 Hz, 1H), 6.76 (d, *J* = 8.0 Hz, 2H), 3.82 (t, *J* = 8.0 Hz, 2H), 3.41 (t, *J* = 8.0 Hz, 1H), 2.26 – 2.17 (m, 1H), 1.86 – 1.78 (m, 1H), 1.76 – 1.65 (m, 2H), 1.46 – 1.33 (m, 2H).

**<sup>13</sup>C NMR** (101 MHz, CDCl<sub>3</sub>) δ 171.71, 159.08, 139.61, 137.94, 129.54, 129.22, 129.05, 128.13, 127.72, 124.42, 120.67, 119.90, 114.61, 67.59, 54.45, 33.07, 29.24, 24.43.

**HRMS** (ESI): C<sub>24</sub>H<sub>26</sub>NO<sub>2</sub><sup>+</sup> (*M*+*H*<sup>+</sup>): 360.1958, found: 360.1956.

[α]<sub>D</sub><sup>25</sup> = 43.7 (*c* = 0.80, CHCl<sub>3</sub>).

**HPLC**: The ee was determined to be 92% on a CHIRALPAK ADH column at 254 nm, 25 °C, with hexane: *i*PrOH = 90:10 at a flow rate 1.0 mL/min. Retention times: *t*<sub>R</sub> (major) = 20.1 min, *t*<sub>R</sub> (minor) = 17.9 min.

### 15 racemic

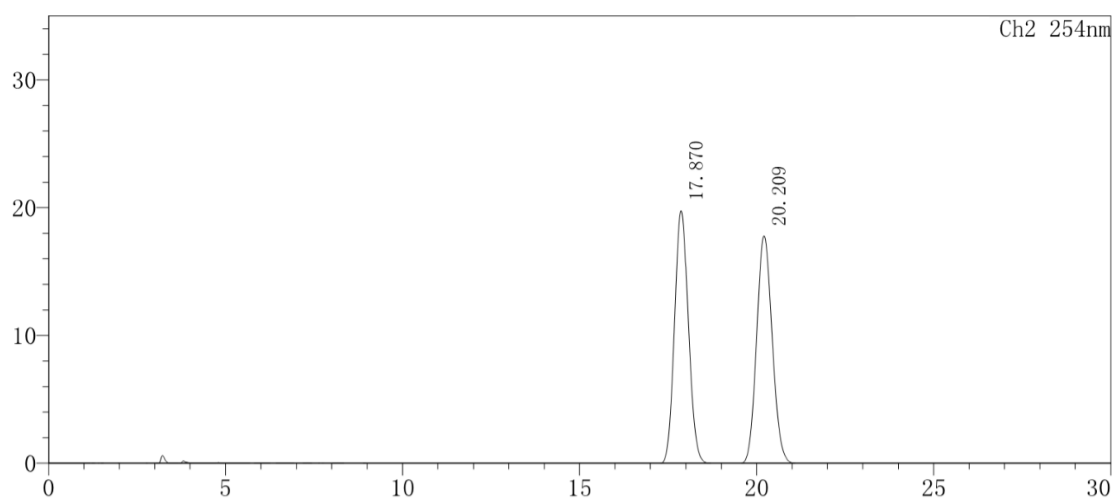

| Peak # | Ret Time [min] | Area [mAU*s] | Height [mAU] | Area [%] |
|--------|----------------|--------------|--------------|----------|
| 1      | 17.870         | 538440       | 19834        | 49.409   |
| 2      | 20.209         | 551329       | 17872        | 50.591   |

**15 enantioenriched, 92% ee**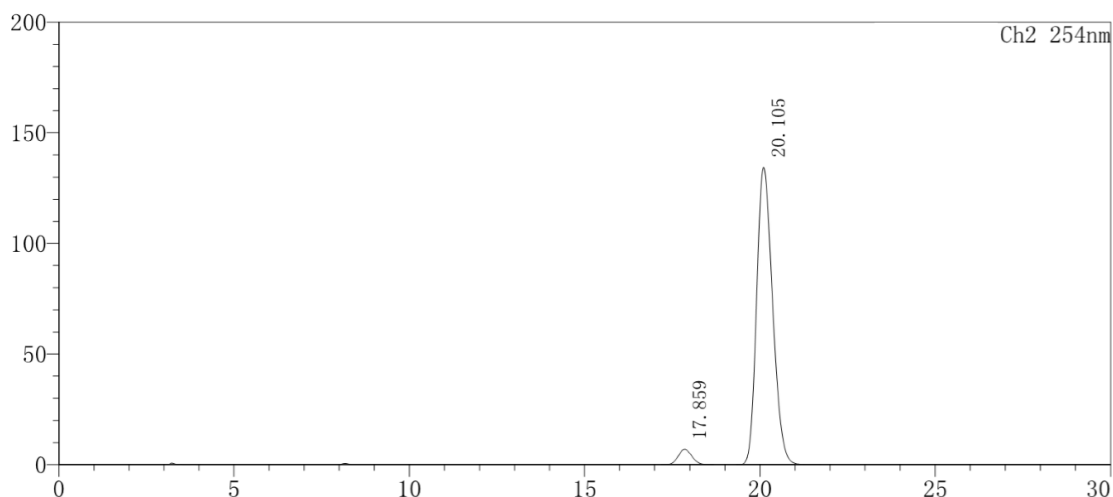

| Peak # | Ret Time [min] | Area [mAU*s] | Height [mAU] | Area [%] |
|--------|----------------|--------------|--------------|----------|
| 1      | 17.859         | 188553       | 6983         | 4.241    |
| 2      | 20.105         | 4257339      | 134374       | 95.759   |

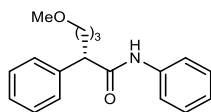**(S)-5-methoxy-N,2-diphenylpentanamide (16)**

According to **General Procedure**, the title compound was isolated by flash column chromatography (silica gel, pentane with 9% EtOAc) as a white solid (19.5 mg, 69%, 91% ee).

**<sup>1</sup>H NMR** (400 MHz, CDCl<sub>3</sub>) δ 7.34 – 7.32 (m, 2H), 7.27 – 7.23 (m, 4H), 7.20 – 7.14 (m, 3H), 6.96 (t, *J* = 8.0 Hz, 1H), 3.44 (t, *J* = 8.0 Hz, 1H), 3.35 – 3.25 (m, 2H), 3.22 (s, 3H), 2.24 – 2.15 (m, 1H), 1.85 – 1.76 (m, 1H), 1.57 – 1.40 (m, 2H).

**<sup>13</sup>C NMR** (101 MHz, CDCl<sub>3</sub>) δ 171.74, 139.71, 138.03, 129.12, 129.02, 128.16, 127.64, 124.33, 119.86, 72.81, 58.73, 54.10, 30.46, 27.82.

**HRMS** (ESI): C<sub>18</sub>H<sub>22</sub>NO<sub>2</sub><sup>+</sup> (*M*+H<sup>+</sup>): 284.1645, found: 284.1642.

[α]<sub>D</sub><sup>25</sup> = 39.1 (*c* = 1.69, CHCl<sub>3</sub>).

**HPLC**: The ee was determined to be 91% on a CHIRALPAK IA column at 254 nm, 25 °C, with hexane: *i*PrOH = 90:10 at a flow rate 1.0 mL/min. Retention times: *t*<sub>R</sub> (major) = 11.0 min, *t*<sub>R</sub> (minor) = 13.5 min.

## 16 racemic

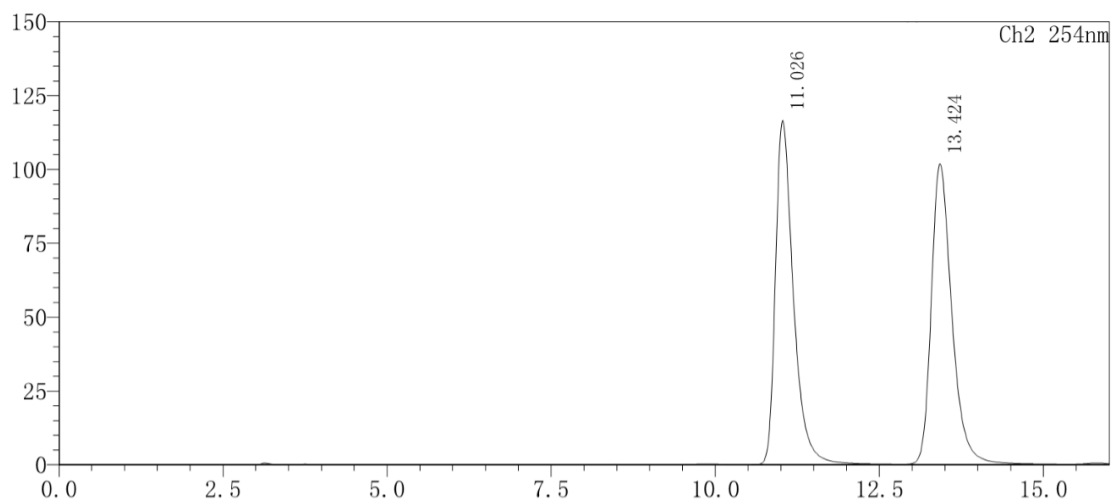

| Peak # | Ret Time [min] | Area [mAU*s] | Height [mAU] | Area [%] |
|--------|----------------|--------------|--------------|----------|
| 1      | 11.026         | 2224030      | 116682       | 50.050   |
| 2      | 13.424         | 2219553      | 101761       | 49.950   |

## 16 enantioenriched, 91% ee

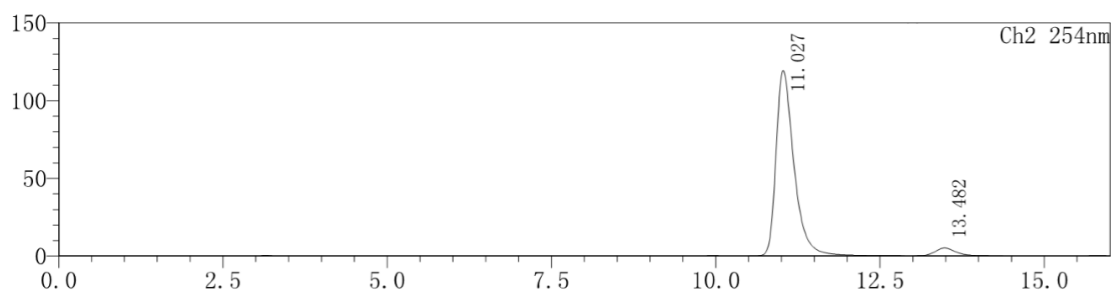

| Peak # | Ret Time [min] | Area [mAU*s] | Height [mAU] | Area [%] |
|--------|----------------|--------------|--------------|----------|
| 1      | 11.027         | 2274645      | 119458       | 95.402   |
| 2      | 13.482         | 109625       | 4969         | 4.598    |

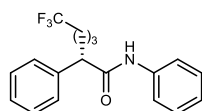

## (S)-6,6,6-trifluoro-N,2-diphenylhexanamide (17)

According to **General Procedure**, the title compound was isolated by flash column chromatography (silica gel, pentane with 9% EtOAc) as a white solid (24.7 mg, 77%, 94% ee).

<sup>1</sup>H NMR (400 MHz, CDCl<sub>3</sub>) δ 7.37 – 7.34 (m, 2H), 7.33 – 7.29 (m, 3H), 7.28 – 7.19 (m, 4H), 7.08 (s, 1H), 7.02 (t, *J* = 8.0 Hz, 1H), 3.42 (t, *J* = 8.0 Hz, 1H), 2.29 – 2.20 (m, 1H),

2.13 – 1.94 (m, 2H), 1.88 – 1.79 (m, 1H), 1.56 – 1.37 (m, 2H).

$^{13}\text{C}$  NMR (101 MHz,  $\text{CDCl}_3$ )  $\delta$  171.16, 139.04, 137.78, 129.42, 129.09, 128.06, 128.02, 127.10 (q,  $J = 277.8$  Hz), 124.59, 119.96, 54.12, 33.77 (q,  $J = 28.3$  Hz), 32.32, 20.43.

$^{19}\text{F}$  NMR (376 MHz,  $\text{CDCl}_3$ )  $\delta$  -66.26 (t,  $J = 11.3$  Hz, 3F).

HRMS (ESI):  $\text{C}_{18}\text{H}_{19}\text{F}_3\text{NO}^+$  ( $\text{M}+\text{H}^+$ ): 322.1413, found: 322.1409.

$[\alpha]_{\text{D}}^{25} = 98.2$  ( $c = 1.02$ ,  $\text{CHCl}_3$ ).

HPLC: The ee was determined to be 94% on a CHIRALPAK IA column at 254 nm, 25 °C, with hexane:  $i$ -PrOH = 90:10 at a flow rate 1.0 mL/min. Retention times:  $t_{\text{R}}$  (major) = 9.1 min,  $t_{\text{R}}$  (minor) = 11.7 min.

### 17 racemic

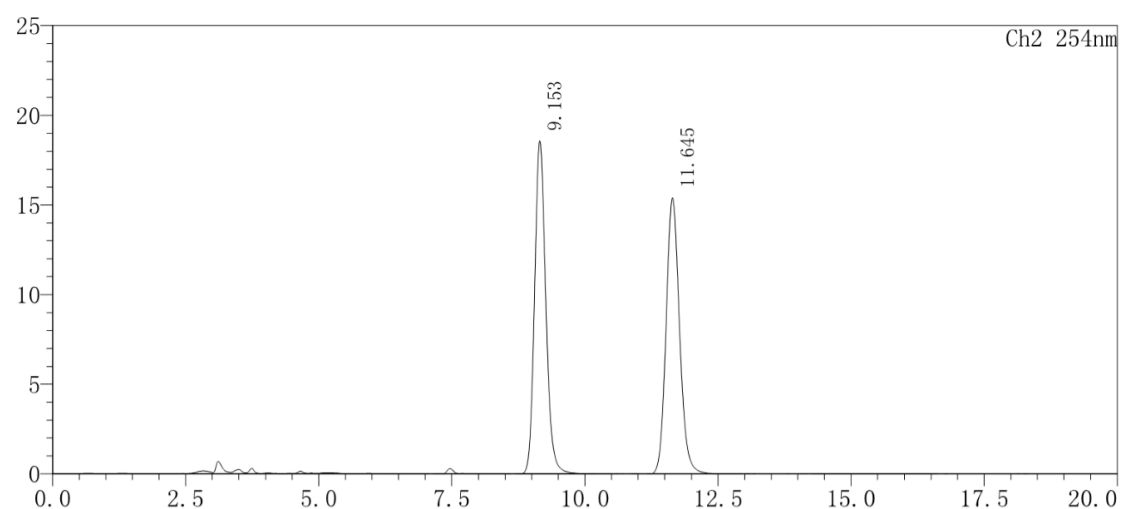

| Peak # | Ret Time [min] | Area [mAU*s] | Height [mAU] | Area [%] |
|--------|----------------|--------------|--------------|----------|
| 1      | 9.153          | 274785       | 18582        | 50.293   |
| 2      | 11.645         | 271587       | 15414        | 49.707   |

### 17 enantioenriched, 94% ee

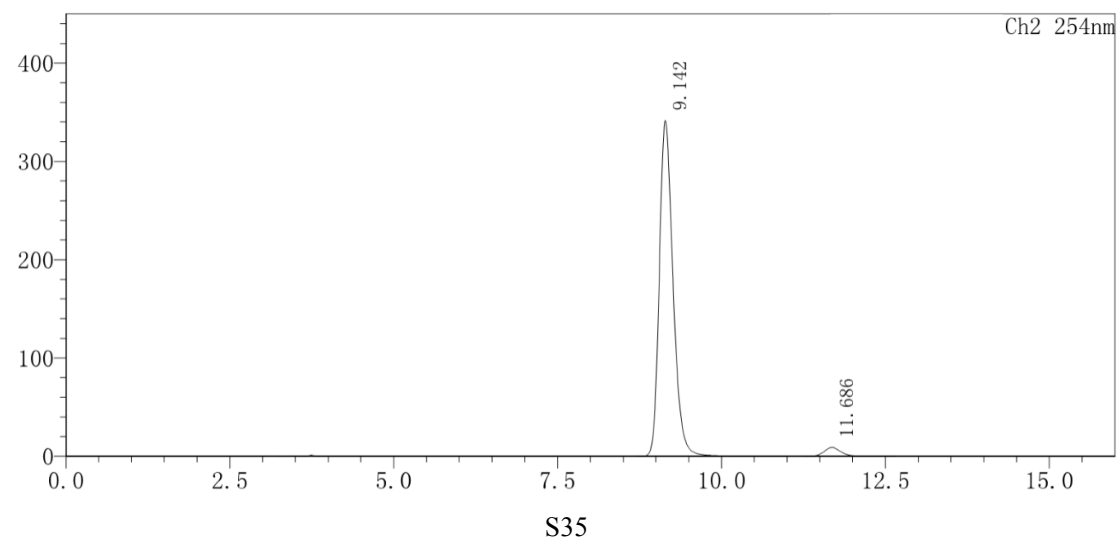

| Peak | Ret Time | Area    | Height | Area   |
|------|----------|---------|--------|--------|
| #    | [min]    | [mAU*s] | [mAU]  | [%]    |
| 1    | 9.142    | 4980014 | 341692 | 96.856 |
| 2    | 11.686   | 161642  | 8990   | 3.144  |

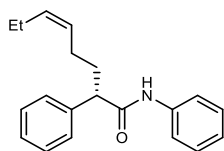

### (*S,Z*)-*N*,2-diphenyloct-5-enamide (**18**)

According to **General Procedure**, the title compound was isolated by flash column chromatography (silica gel, pentane with 5% EtOAc) as a white solid (17.9 mg, 61%, 91% ee).

**<sup>1</sup>H NMR** (400 MHz, CDCl<sub>3</sub>) δ 7.34 – 7.32 (m, 2H), 7.27 – 7.26 (m, 3H), 7.22 – 7.14 (m, 4H), 6.96 (t, *J* = 8.0 Hz, 1H), 5.34 – 5.20 (m, 2H), 3.43 (t, *J* = 8.0 Hz, 1H), 2.27 – 2.18 (m, 1H), 1.97 – 1.92 (m, 2H), 1.88 – 1.76 (m, 3H), 0.82 (t, *J* = 8.0 Hz, 3H).

**<sup>13</sup>C NMR** (101 MHz, CDCl<sub>3</sub>) 171.79, 139.59, 137.97, 132.97, 129.12, 129.00, 128.18, 127.97, 127.64, 124.36, 119.91, 53.56, 33.21, 25.11, 20.67, 14.42.

**HRMS** (ESI): C<sub>20</sub>H<sub>24</sub>NO<sup>+</sup> (*M*+*H*<sup>+</sup>): 294.1852, found: 294.1848.

[α]<sub>D</sub><sup>25</sup> = 51.2 (*c* = 0.87, CHCl<sub>3</sub>).

**HPLC**: The ee was determined to be 91% on a CHIRALPAK IA column at 254 nm, 25 °C, with hexane: *i*-PrOH = 95:5 at a flow rate 1.0 mL/min. Retention times: *t*<sub>R</sub> (major) = 13.5 min, *t*<sub>R</sub> (minor) = 15.7 min.

### **18 racemic**

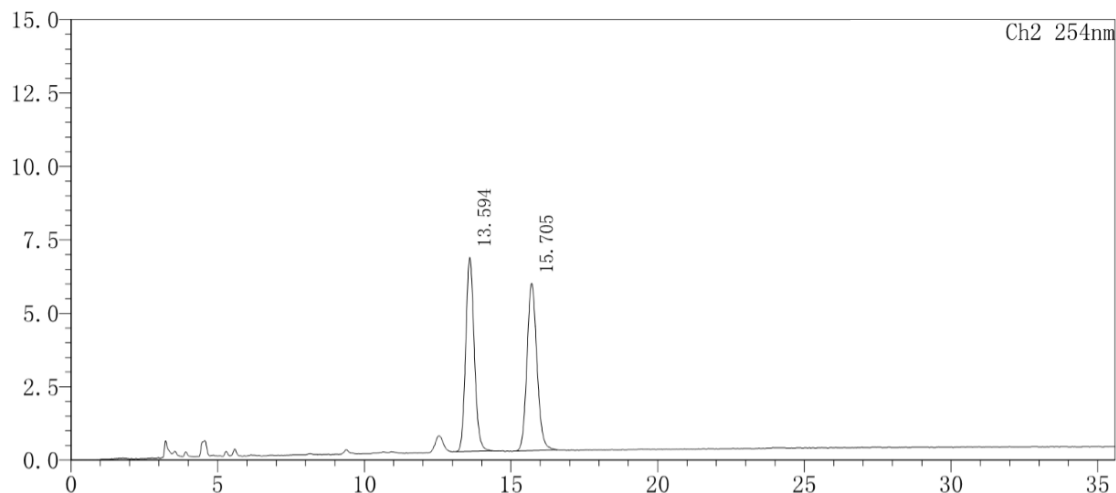



| Peak | Ret Time | Area    | Height | Area   |
|------|----------|---------|--------|--------|
| #    | [min]    | [mAU*s] | [mAU]  | [%]    |
| 1    | 13.594   | 133421  | 6604   | 49.685 |
| 2    | 15.705   | 135112  | 5692   | 50.315 |

### 18 enantioenriched, 91% ee

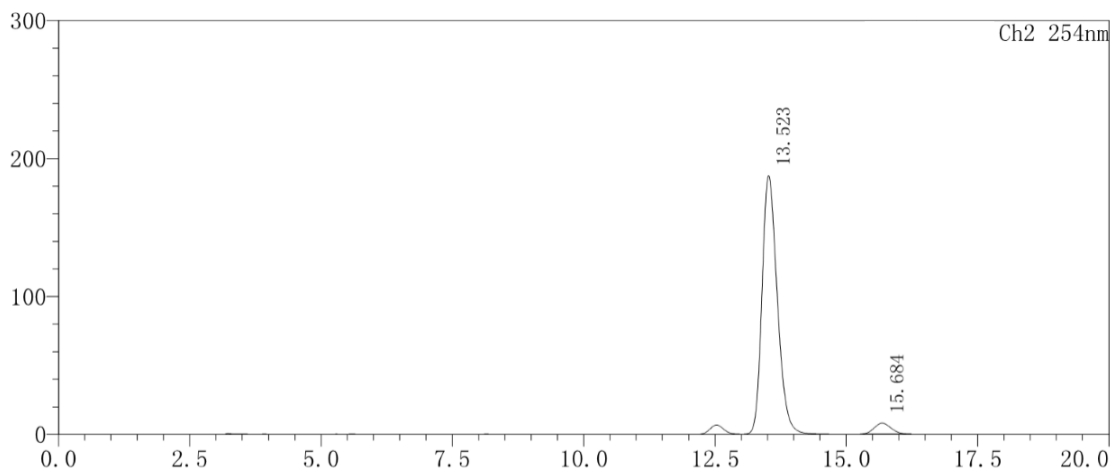

| Peak | Ret Time | Area    | Height | Area   |
|------|----------|---------|--------|--------|
| #    | [min]    | [mAU*s] | [mAU]  | [%]    |
| 1    | 13.523   | 3799596 | 187486 | 95.505 |
| 2    | 15.684   | 178832  | 7947   | 4.495  |

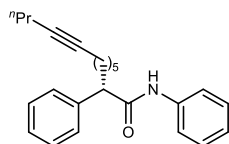

### (S)-N,2-diphenyldodec-8-ynamide (19)

According to **General Procedure**, the title compound was isolated by flash column chromatography (silica gel, pentane with 6% EtOAc) as a white solid (23.6 mg, 68%, 94% ee).

$^1\text{H}$  NMR (400 MHz,  $\text{CDCl}_3$ )  $\delta$  7.43 – 7.42 (m, 2H), 7.39 – 7.33 (m, 4H), 7.32 – 7.27 (m, 2H), 7.25 (s, 1H), 7.08 – 7.01 (m, 2H), 3.47 (t,  $J$  = 8.0 Hz, 1H), 2.30 – 2.20 (m, 1H), 2.12 – 2.09 (m, 3H), 1.89 – 1.80 (m, 1H), 1.51 – 1.44 (m, 5H), 1.40 – 1.26 (m, 4H), 0.96 (t,  $J$  = 8.0 Hz, 3H).

$^{13}\text{C}$  NMR (101 MHz,  $\text{CDCl}_3$ )  $\delta$  171.81, 139.79, 137.99, 129.19, 129.06, 128.15, 127.67, 124.39, 119.84, 80.37, 80.30, 54.54, 33.26, 29.02, 28.73, 27.38, 22.68, 20.90, 18.80, 13.63.

HRMS (ESI):  $\text{C}_{24}\text{H}_{30}\text{NO}^+$  ( $\text{M}+\text{H}^+$ ): 348.2322, found: 348.2318.

$[\alpha]_D^{25} = 39.3$  ( $c = 0.91$ ,  $\text{CHCl}_3$ ).

**HPLC:** The ee was determined to be 91% on a CHIRALPAK IA column at 254 nm, 25 °C, with hexane: *i*PrOH = 94:6 at a flow rate 1.0 mL/min. Retention times:  $t_R$  (major) = 12.3 min,  $t_R$  (minor) = 14.8 min.

### 19 racemic

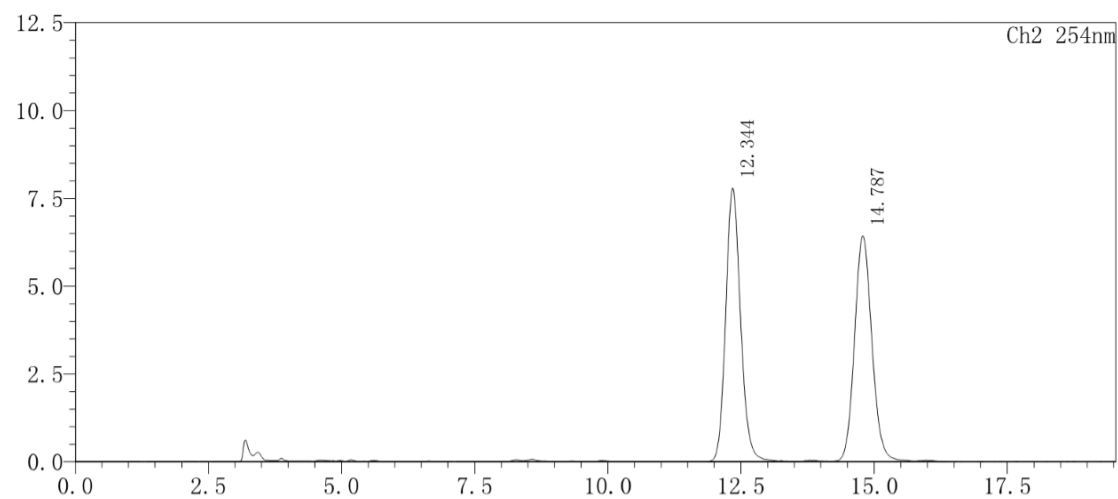

| Peak # | Ret Time [min] | Area [mAU*s] | Height [mAU] | Area [%] |
|--------|----------------|--------------|--------------|----------|
| 1      | 12.344         | 151526       | 7791         | 50.679   |
| 2      | 14.787         | 147466       | 6437         | 49.321   |

### 19 enantioenriched, 94% ee

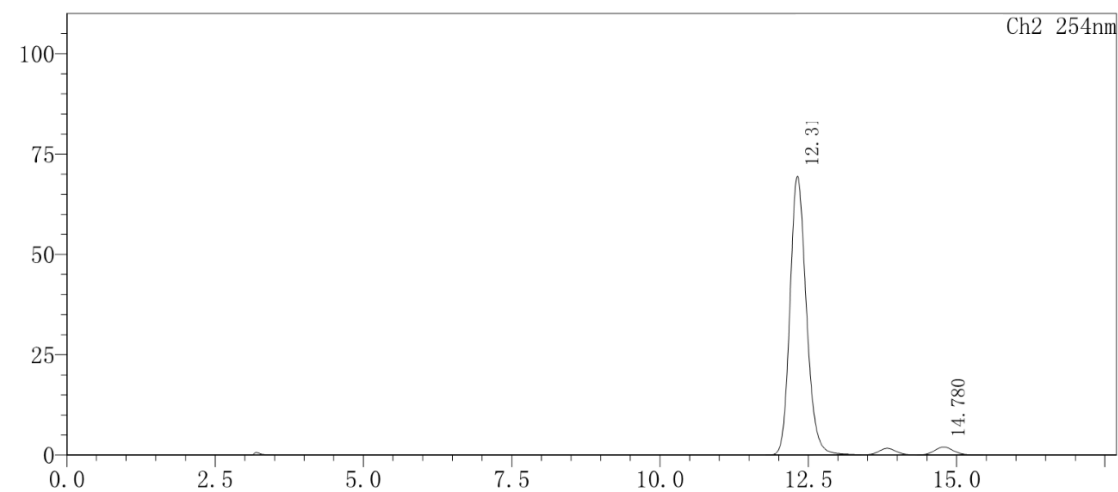

| Peak # | Ret Time [min] | Area [mAU*s] | Height [mAU] | Area [%] |
|--------|----------------|--------------|--------------|----------|
| 1      | 12.316         | 1330666      | 69538        | 96.837   |
| 2      | 14.780         | 43461        | 1970         | 3.163    |

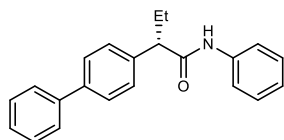

**(S)-2-([1,1'-biphenyl]-4-yl)-N-phenylbutanamide (20)**

According to **General Procedure**, the title compound was isolated by flash column chromatography (silica gel, pentane with 9% EtOAc) as a white solid (23.0 mg, 73%, 93% ee).

**<sup>1</sup>H NMR** (400 MHz, CDCl<sub>3</sub>) δ 7.60 – 7.58 (m, 4H), 7.48 – 7.43 (m, 6H), 7.35 (t, *J* = 8.0 Hz, 1H), 7.30 – 7.26 (m, 2H), 7.20 (s, 1H), 7.08 (t, *J* = 8.0 Hz, 1H), 3.44 (t, *J* = 8.0 Hz, 1H), 2.37 – 2.26 (m, 1H), 1.97 – 1.86 (m, 1H), 0.97 (t, *J* = 8.0 Hz, 3H).

**<sup>13</sup>C NMR** (101 MHz, CDCl<sub>3</sub>) δ 171.74, 140.72, 140.58, 138.65, 137.99, 129.09, 128.95, 128.61, 127.85, 127.53, 127.18, 124.43, 119.90, 56.03, 26.63, 12.54..

**HRMS** (ESI): C<sub>22</sub>H<sub>22</sub>NO<sup>+</sup> (*M*+H<sup>+</sup>): 316.1696, found: 316.1692.

[α]<sub>D</sub><sup>25</sup> = 47.6 (*c* = 1.02, CHCl<sub>3</sub>).

**HPLC**: The ee was determined to be 93% on a CHIRALPAK ADH column at 254 nm, 25 °C, with hexane: *i*PrOH = 75:25 at a flow rate 1.0 mL/min. Retention times: *t*<sub>R</sub> (major) = 5.2 min, *t*<sub>R</sub> (minor) = 7.6 min.

**20 racemic**

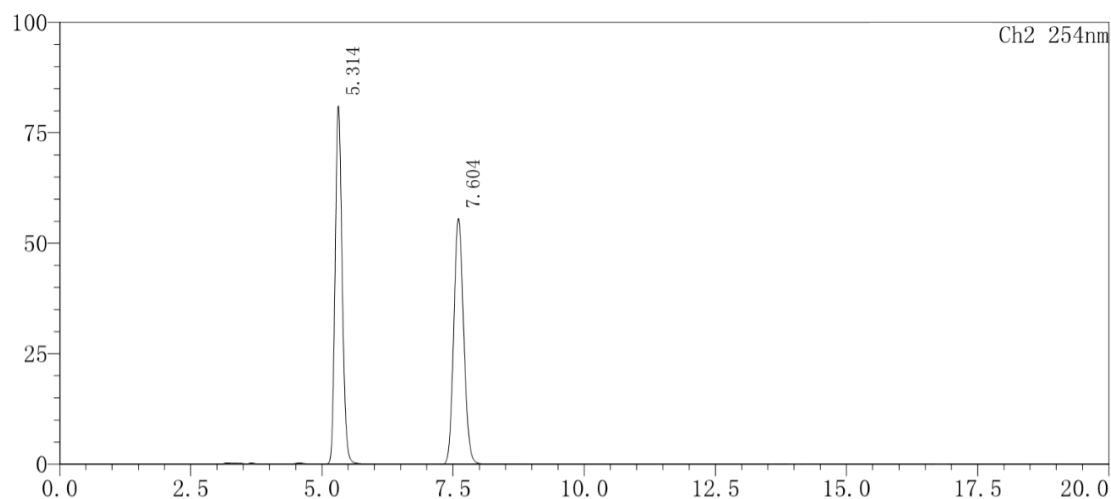

| Peak # | Ret Time [min] | Area [mAU*s] | Height [mAU] | Area [%] |
|--------|----------------|--------------|--------------|----------|
| 1      | 5.314          | 756716       | 81066        | 50.728   |
| 2      | 7.604          | 735001       | 55623        | 49.272   |

**20 enantioenriched, 93% ee**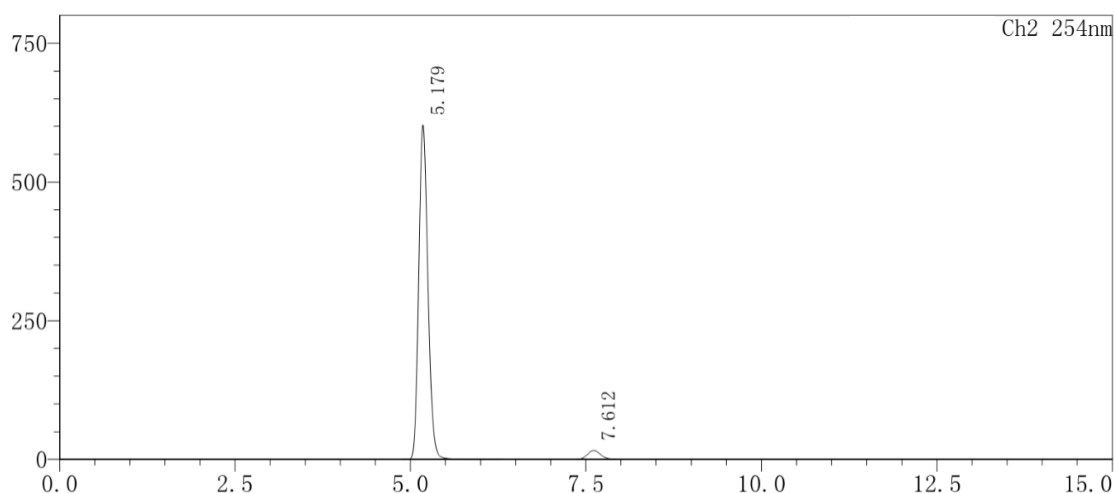

| Peak # | Ret Time [min] | Area [mAU*s] | Height [mAU] | Area [%] |
|--------|----------------|--------------|--------------|----------|
| 1      | 5.179          | 5491037      | 602023       | 96.347   |
| 2      | 7.612          | 208170       | 15890        | 3.653    |

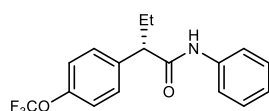**(S)-N-phenyl-2-(4-(trifluoromethoxy)phenyl)butanamide (21)**

According to **General Procedure**, the title compound was isolated by flash column chromatography (silica gel, pentane with 8% EtOAc) as a white solid (20.3 mg, 63%, 91% ee).

**<sup>1</sup>H NMR** (400 MHz, CDCl<sub>3</sub>) δ 7.39 – 7.37 (m, 2H), 7.34 – 7.31 (m, 2H), 7.23 – 7.17 (m, 3H), 7.13 – 7.11 (m, 2H), 7.03 – 6.99 (m, 1H), 3.30 (t, *J* = 7.5 Hz, 1H), 2.25 – 2.08 (m, 1H), 1.82 – 1.71 (m, 1H), 0.86 (t, *J* = 7.4 Hz, 3H).

**<sup>13</sup>C NMR** (101 MHz, CDCl<sub>3</sub>) δ 171.34, 148.66, 138.40, 137.80, 129.44, 129.12, 124.65, 120.59 (q, *J* = 258.6 Hz), 121.47, 120.01, 55.65, 27.05, 12.39.

**<sup>19</sup>F NMR** (377 MHz, CDCl<sub>3</sub>) δ -57.85 (s, 3F).

**HRMS** (ESI): C<sub>17</sub>H<sub>17</sub>F<sub>3</sub>NO<sub>2</sub><sup>+</sup> (*M*+H<sup>+</sup>): 324.1206, found: 324.1203.

[α]<sub>D</sub><sup>25</sup> = 31.5 (c = 1.12, CHCl<sub>3</sub>).

**HPLC**: The ee was determined to be 91% on a CHIRALPAK IA column at 254 nm, 25 °C, with hexane: *i*PrOH = 95:5 at a flow rate 1.0 mL/min. Retention times: *t*<sub>R</sub> (major) = 12.3 min, *t*<sub>R</sub> (minor) = 14.8 min.

## 21 racemic

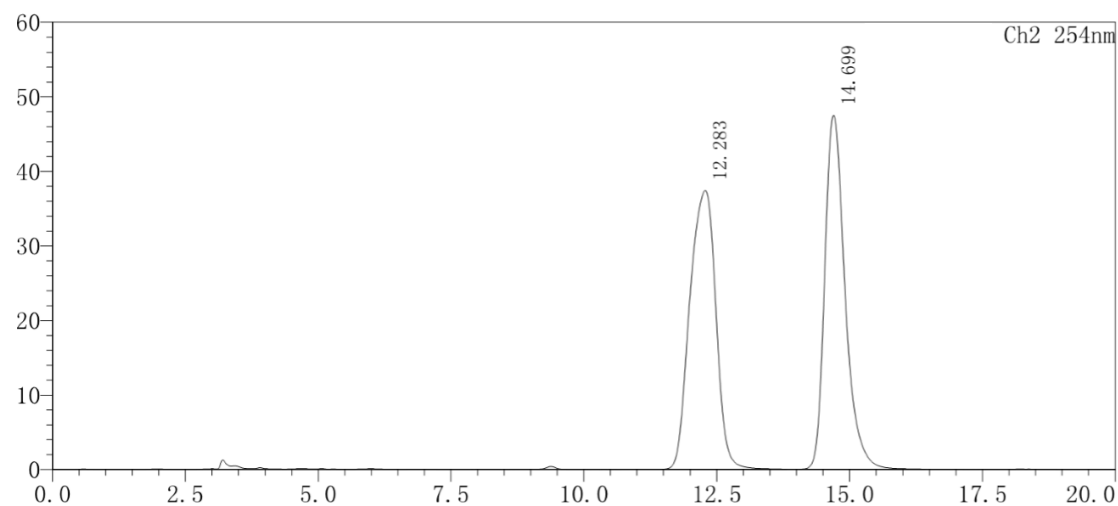

| Peak # | Ret Time [min] | Area [mAU*s] | Height [mAU] | Area [%] |
|--------|----------------|--------------|--------------|----------|
| 1      | 12.283         | 1272790      | 37395        | 50.229   |
| 2      | 14.699         | 1261197      | 47479        | 49.771   |

## 21 enantioenriched, 91% ee

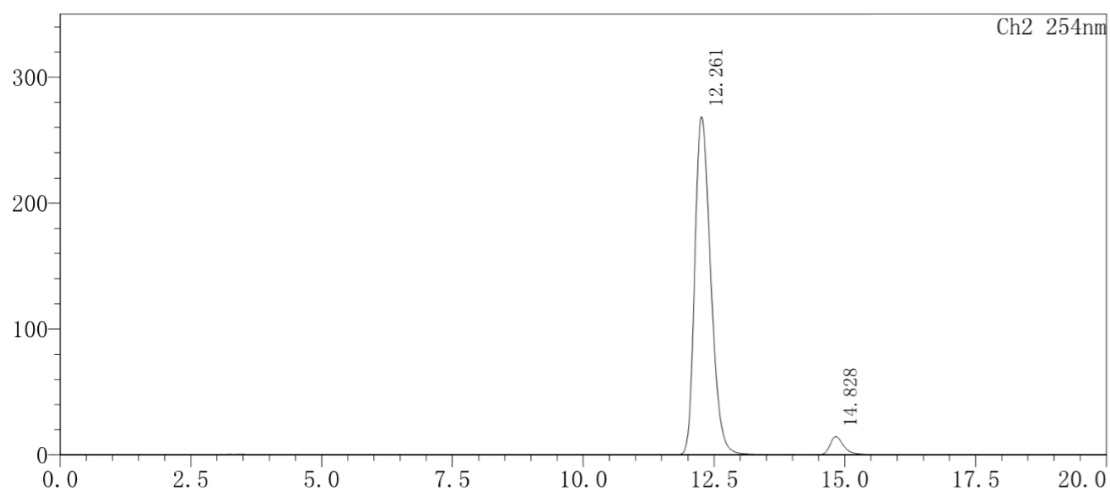

| Peak # | Ret Time [min] | Area [mAU*s] | Height [mAU] | Area [%] |
|--------|----------------|--------------|--------------|----------|
| 1      | 12.261         | 5723388      | 268654       | 95.433   |
| 2      | 14.828         | 273908       | 14681        | 4.567    |

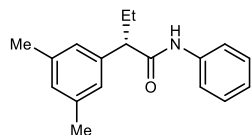

## (*S*)-2-(3,5-dimethylphenyl)-*N*-phenylbutanamide (22)

According to **General Procedure**, the title compound was isolated by flash column

chromatography (silica gel, pentane with 5% EtOAc) as a white solid (19.2 mg, 72%, 91% ee).

**$^1\text{H}$  NMR** (400 MHz,  $\text{CDCl}_3$ )  $\delta$  7.38 – 7.36 (m, 2H), 7.25 (s, 1H), 7.18 – 7.15 (m, 2H), 6.96 (t,  $J$  = 8.0 Hz, 1H), 6.87 (s, 2H), 6.83 (s, 1H), 3.25 (t,  $J$  = 8.0 Hz, 1H), 2.21 (s, 6H), 2.19 – 2.13 (m, 1H), 1.81 – 1.70 (m, 1H), 0.84 (t,  $J$  = 8.0 Hz, 3H).

**$^{13}\text{C}$  NMR** (101 MHz,  $\text{CDCl}_3$ )  $\delta$  172.14, 139.52, 138.59, 138.12, 129.25, 128.96, 125.91, 124.22, 119.87, 56.08, 26.41, 21.43, 12.54.

**HRMS** (EI):  $\text{C}_{18}\text{H}_{21}\text{NO}$ : 267.1623, found: 267.1617.

$[\alpha]_{\text{D}}^{25}$  = 29.8 ( $c$  = 0.61,  $\text{CHCl}_3$ ).

**HPLC**: The ee was determined to be 91% on a CHIRALPAK IA column at 254 nm, 25 °C, with hexane:  $i$ PrOH = 95:5 at a flow rate 1.0 mL/min. Retention times:  $t_{\text{R}}$  (major) = 10.4 min,  $t_{\text{R}}$  (minor) = 11.7 min.

## 22 racemic

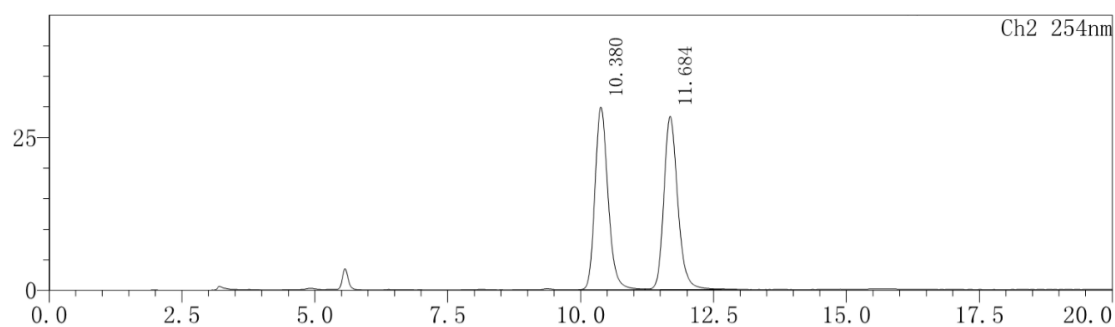

| Peak # | Ret Time [min] | Area [mAU*s] | Height [mAU] | Area [%] |
|--------|----------------|--------------|--------------|----------|
| 1      | 10.380         | 512750       | 29863        | 49.794   |
| 2      | 11.684         | 517000       | 28369        | 50.206   |

## 22 enantioenriched, 91% ee

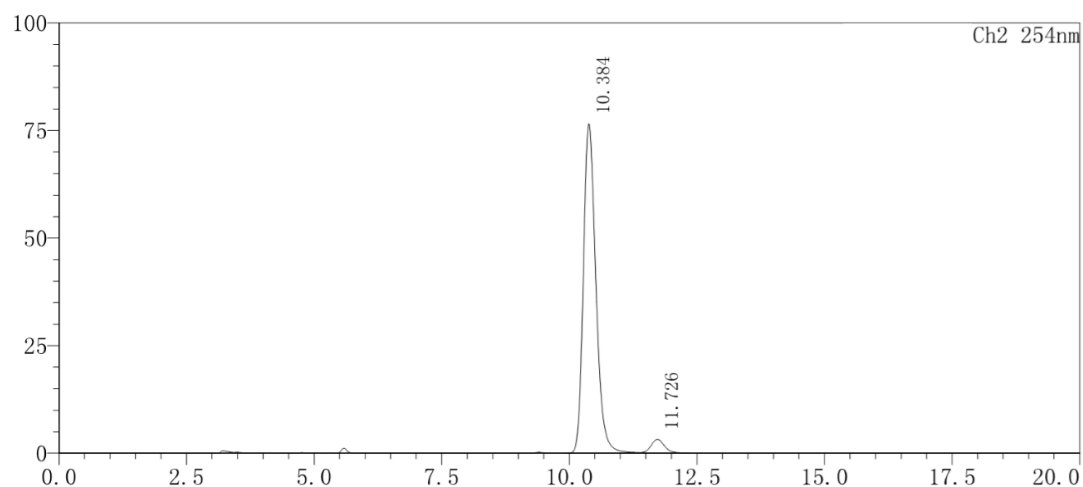

| Peak | Ret Time | Area    | Height | Area   |
|------|----------|---------|--------|--------|
| #    | [min]    | [mAU*s] | [mAU]  | [%]    |
| 1    | 10.384   | 1308894 | 76628  | 95.590 |
| 2    | 11.726   | 60385   | 3204   | 4.410  |

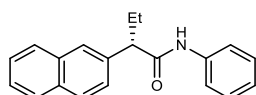

**(S)-2-(naphthalen-2-yl)-N-phenylbutanamide (23)**

According to **General Procedure**, the title compound was isolated by flash column chromatography (silica gel, pentane with 9% EtOAc) as a white solid (21.7 mg, 75%, 93% ee).

**<sup>1</sup>H NMR** (400 MHz, CDCl<sub>3</sub>) δ 7.86 – 7.82 (m, 4H), 7.52 – 7.44 (m, 5H), 7.36 (s, 1H), 7.27 – 7.23 (m, 2H), 7.06 (t, *J* = 8.0 Hz, 1H), 3.59 (t, *J* = 8.0 Hz, 1H), 2.42 – 2.32 (m, 1H), 2.04 – 1.93 (m, 1H), 0.96 (t, *J* = 8.0 Hz, 3H).

**<sup>13</sup>C NMR** (101 MHz, CDCl<sub>3</sub>) δ 171.90, 137.97, 137.10, 133.63, 132.86, 128.99, 128.95, 127.88, 127.82, 127.18, 126.47, 126.12, 125.92, 124.38, 119.97, 56.24, 26.42, 12.47.

**HRMS** (ESI): C<sub>20</sub>H<sub>20</sub>NO<sup>+</sup> (M+H<sup>+</sup>): 290.1539, found: 290.1536.

[α]<sub>D</sub><sup>25</sup> = 68.1 (c = 1.01, CHCl<sub>3</sub>).

**HPLC**: The ee was determined to be 93% on a CHIRALPAK IA column at 254 nm, 25 °C, with hexane: *i*PrOH = 90:10 at a flow rate 1.0 mL/min. Retention times: t<sub>R</sub> (major) = 12.0 min, t<sub>R</sub> (minor) = 15.4 min.

**23 racemic**

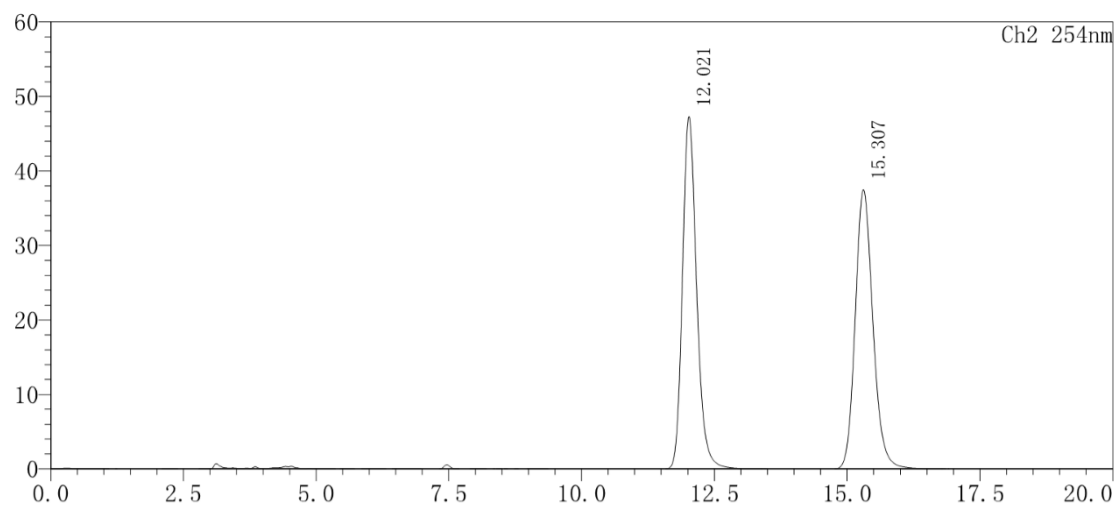

| Peak | Ret Time | Area    | Height | Area   |
|------|----------|---------|--------|--------|
| #    | [min]    | [mAU*s] | [mAU]  | [%]    |
| 1    | 12.021   | 877547  | 47387  | 49.980 |
| 2    | 15.307   | 878237  | 37580  | 50.020 |

### 23 enantioenriched, 93% ee

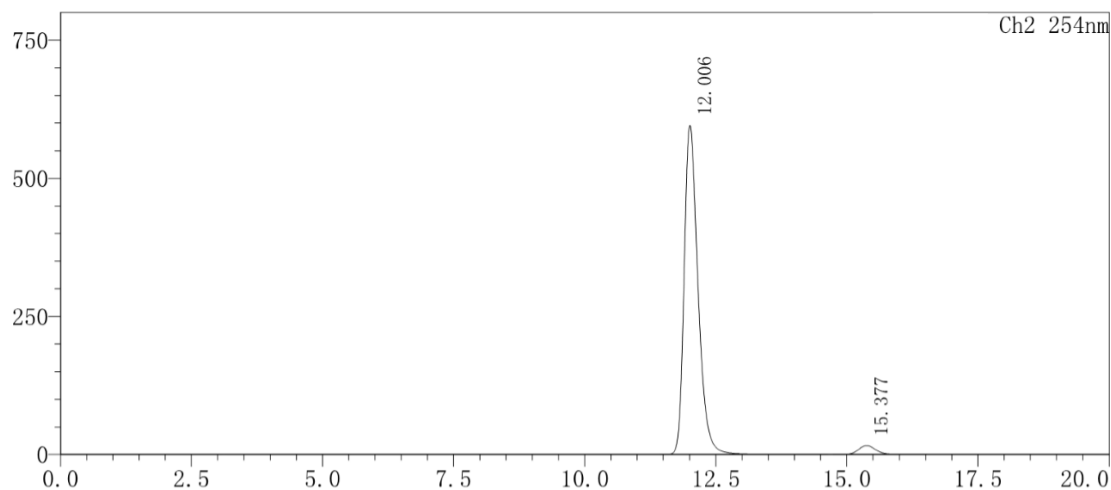

| Peak | Ret Time | Area     | Height | Area   |
|------|----------|----------|--------|--------|
| #    | [min]    | [mAU*s]  | [mAU]  | [%]    |
| 1    | 12.006   | 10907664 | 596047 | 96.657 |
| 2    | 15.377   | 377301   | 16137  | 3.343  |

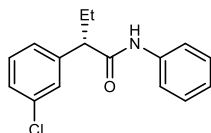

### (*S*)-2-(3-chlorophenyl)-*N*-phenylbutanamide (**24**)

According to **General Procedure**, the title compound was isolated by flash column chromatography (silica gel, pentane with 9% EtOAc) as a white solid (21.8 mg, 80%, 92% ee).

**<sup>1</sup>H NMR** (400 MHz, CDCl<sub>3</sub>) δ 7.47 – 7.45 (m, 2H), 7.37 (s, 1H), 7.30 – 7.27 (m, 4H), 7.22 (s, 1H), 7.08 (t, *J* = 8.0 Hz, 1H), 3.34 (t, *J* = 8.0 Hz, 1H), 2.29 – 2.18 (m, 1H), 1.90 – 1.79 (m, 1H), 0.93 (t, *J* = 8.0 Hz, 3H).

**<sup>13</sup>C NMR** (101 MHz, CDCl<sub>3</sub>) δ 171.09, 141.70, 137.80, 134.84, 130.30, 129.10, 128.32, 127.82, 126.23, 124.60, 120.01, 55.97, 26.82, 12.39.

**HRMS** (EI): C<sub>16</sub>H<sub>16</sub>ClNO (M): 273.0920, found: 273.0921.

[α]<sub>D</sub><sup>25</sup> = 43.1 (c = 0.97, CHCl<sub>3</sub>).



**HPLC:** The ee was determined to be 92% on a CHIRALPAK IA column at 254 nm, 25 °C, with hexane:*i*PrOH = 90:10 at a flow rate 1.0 mL/min. Retention times:  $t_R$  (major) = 7.8 min,  $t_R$  (minor) = 9.1 min.

**24 racemic**

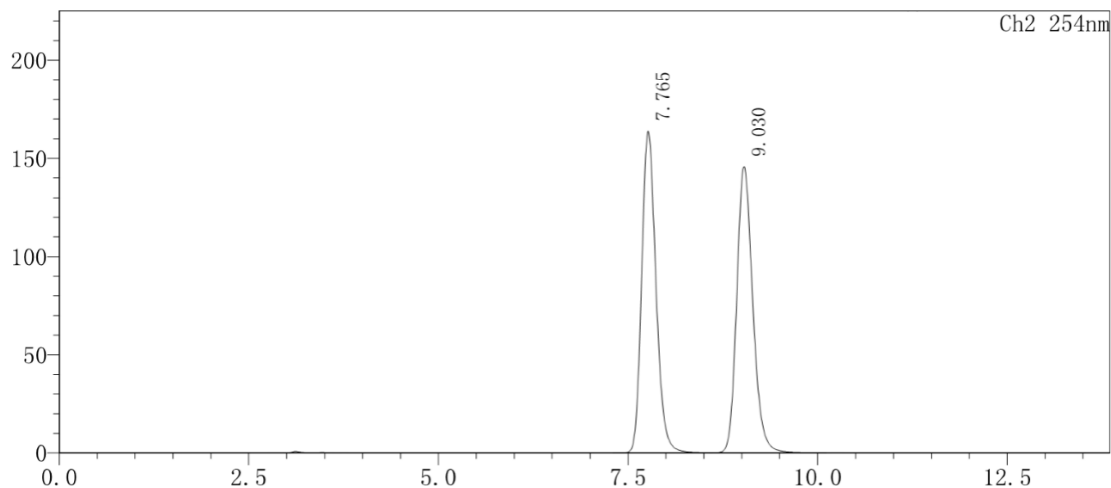

| Peak # | Ret Time [min] | Area [mAU*s] | Height [mAU] | Area [%] |
|--------|----------------|--------------|--------------|----------|
| 1      | 7.765          | 2155781      | 163845       | 50.005   |
| 2      | 9.030          | 2155341      | 145720       | 49.995   |

**24 enantioenriched, 92% ee**

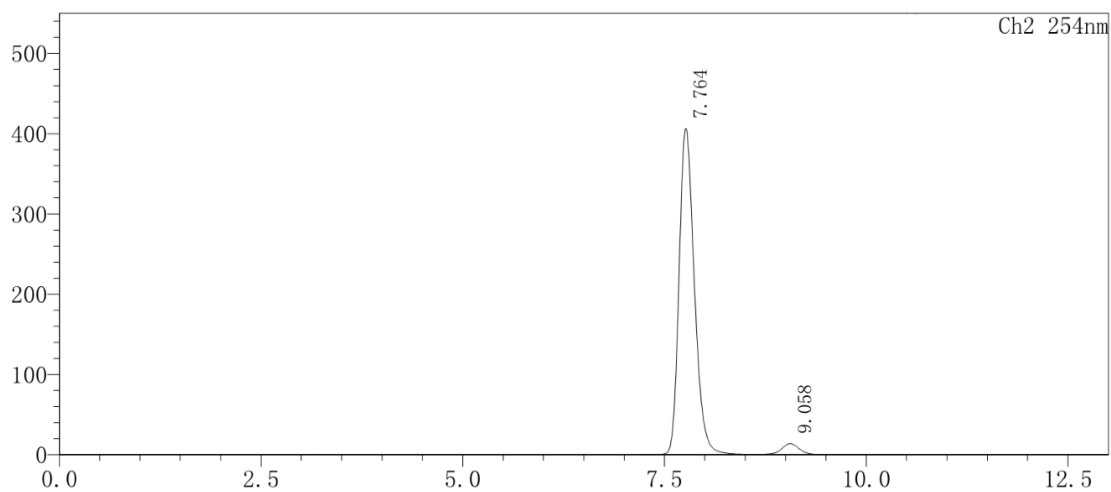

| Peak # | Ret Time [min] | Area [mAU*s] | Height [mAU] | Area [%] |
|--------|----------------|--------------|--------------|----------|
| 1      | 7.764          | 5378796      | 406618       | 95.998   |
| 2      | 9.058          | 224216       | 13994        | 4.002    |

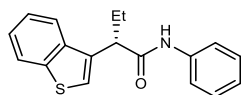

**(S)-2-(benzo[b]thiophen-3-yl)-N-phenylbutanamide (25)**

According to **General Procedure**, the title compound was isolated by flash column chromatography (silica gel, pentane with 6% EtOAc) as a yellow oil (19.2 mg, 65%, 92% ee).

**<sup>1</sup>H NMR** (400 MHz, CDCl<sub>3</sub>) δ 7.70 – 7.68 (m, 2H), 7.20 – 7.15 (m, 5H), 7.07 – 7.04 (m, 2H), 6.87 (t, *J* = 8.0 Hz, 1H), 3.70 (t, *J* = 8.0 Hz, 1H), 2.19 – 2.12 (m, 1H), 1.93 – 1.86 (m, 1H), 0.85 (t, *J* = 8.09 Hz, 3H).

**<sup>13</sup>C NMR** (101 MHz, CDCl<sub>3</sub>) δ 171.18, 140.82, 138.18, 137.77, 134.12, 129.00, 124.89, 124.57, 124.50, 123.70, 123.19, 121.89, 120.12, 50.02, 25.64, 12.67.

**HRMS** (ESI): C<sub>18</sub>H<sub>18</sub>NOS<sup>+</sup> (*M*+H<sup>+</sup>): 296.1104, found: 296.1099.

[α]<sub>D</sub><sup>25</sup> = 42.6 (*c* = 1.29, CHCl<sub>3</sub>).

**HPLC**: The ee was determined to be 92% on a CHIRALPAK IA column at 254 nm, 25 °C, with hexane: *i*-PrOH = 90:10 at a flow rate 1.0 mL/min. Retention times: *t*<sub>R</sub> (major) = 10.0 min, *t*<sub>R</sub> (minor) = 12.7 min.

**25 racemic**

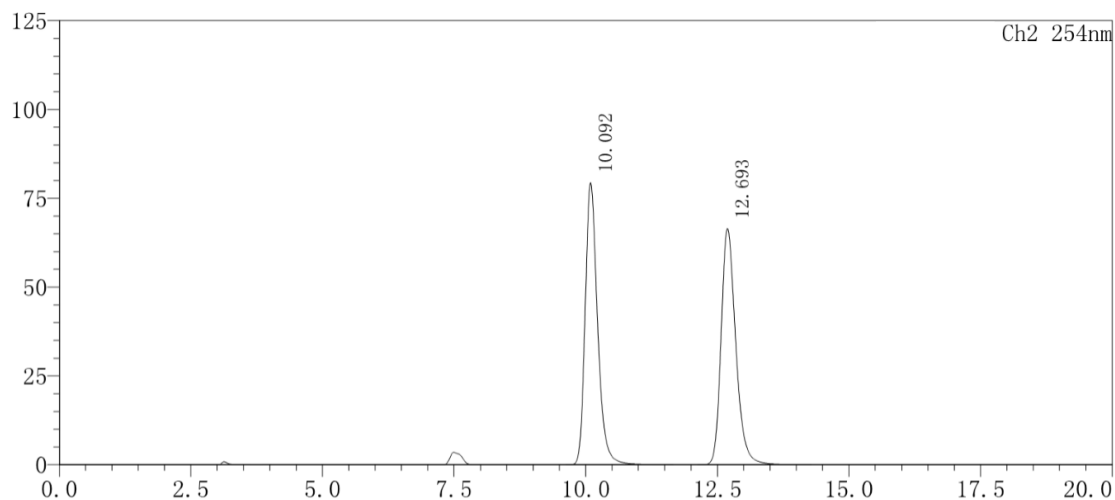

| Peak # | Ret Time [min] | Area [mAU*s] | Height [mAU] | Area [%] |
|--------|----------------|--------------|--------------|----------|
| 1      | 10.092         | 1293736      | 79411        | 50.027   |
| 2      | 12.693         | 1292345      | 66476        | 49.973   |

## 25 enantioenriched, 92% ee

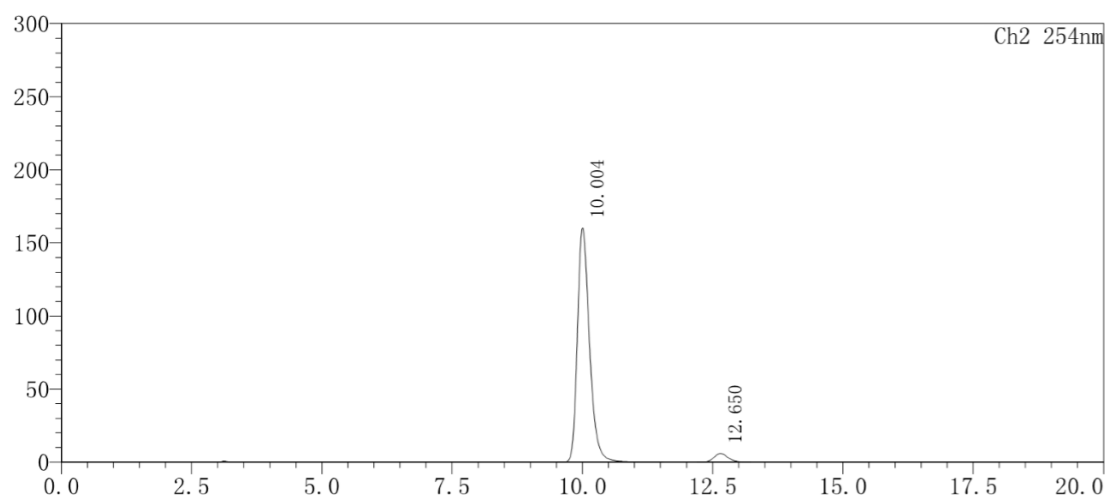

| Peak # | Ret Time [min] | Area [mAU*s] | Height [mAU] | Area [%] |
|--------|----------------|--------------|--------------|----------|
| 1      | 10.004         | 2573043      | 160243       | 95.794   |
| 2      | 12.650         | 112961       | 5922         | 4.206    |

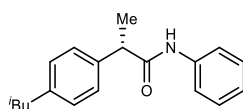

### (S)-2-(4-isobutylphenyl)-N-phenylpropanamide (26)<sup>6</sup>

According to **General Procedure**, the title compound was isolated by flash column chromatography (silica gel, pentane with 6% EtOAc) as a white solid (23.0 mg, 82%, 93% ee).

<sup>1</sup>H NMR (400 MHz, CDCl<sub>3</sub>) δ 7.41 – 7.39 (m, 2H), 7.29 – 7.27 (m, 2H), 7.26 – 7.25 (m, 2H), 7.16 (d, *J* = 8.0 Hz, 2H), 7.06 (t, *J* = 8.0 Hz, 1H), 7.00 (s, 1H), 3.69 (q, *J* = 8.0 Hz, 1H), 2.48 (d, *J* = 4.0 Hz, 2H), 1.92 – 1.82 (m, 1H), 1.60 (d, *J* = 4.0 Hz, 3H), 0.91 (d, *J* = 8.0 Hz, 6H).

<sup>13</sup>C NMR (101 MHz, CDCl<sub>3</sub>) δ 172.71, 141.26, 138.19, 138.05, 130.02, 129.04, 127.58, 124.30, 119.74, 47.91, 45.15, 30.32, 22.52, 18.62.

[α]<sub>D</sub><sup>25</sup> = 37.8 (c = 1.13, CHCl<sub>3</sub>).

**HPLC:** The ee was determined to be 93% on a CHIRALPAK IA column at 254 nm, 25 °C, with hexane: *i*-PrOH = 90:10 at a flow rate 1.0 mL/min. Retention times: *t*<sub>R</sub> (major) = 7.2 min, *t*<sub>R</sub> (minor) = 8.9 min.

## 26 racemic

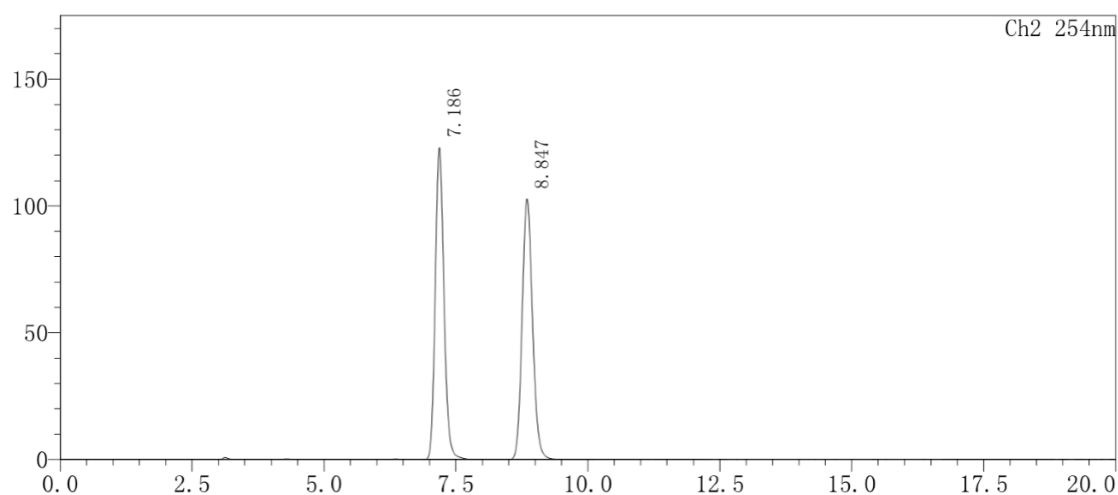

| Peak # | Ret Time [min] | Area [mAU*s] | Height [mAU] | Area [%] |
|--------|----------------|--------------|--------------|----------|
| 1      | 7.186          | 1422581      | 123146       | 50.025   |
| 2      | 8.847          | 1421179      | 102903       | 49.975   |

## 26 enantioenriched, 93% ee

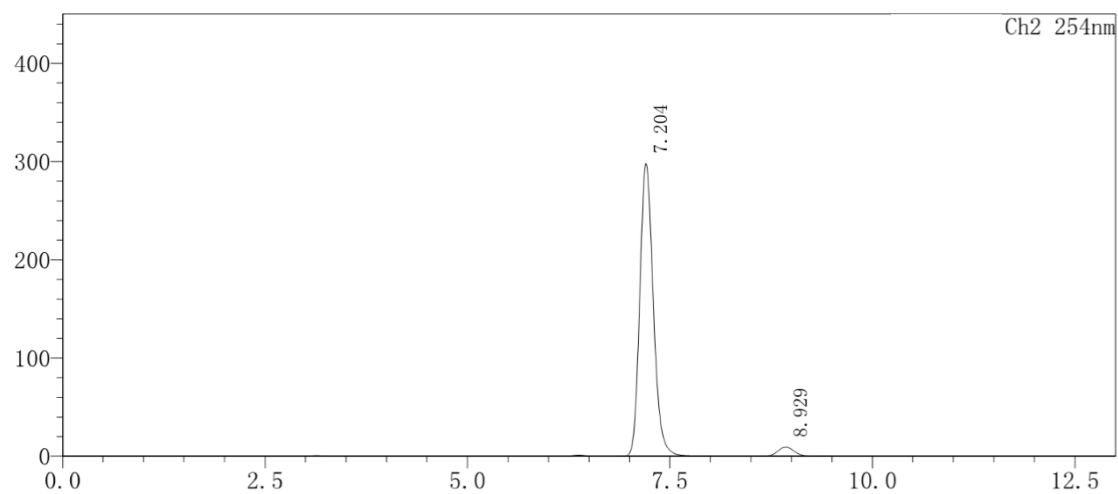

| Peak # | Ret Time [min] | Area [mAU*s] | Height [mAU] | Area [%] |
|--------|----------------|--------------|--------------|----------|
| 1      | 7.204          | 3461110      | 297626       | 96.264   |
| 2      | 8.929          | 134309       | 9381         | 3.736    |

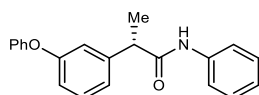

## (S)-2-(3-phenoxyphenyl)-N-phenylpropanamide (27) <sup>6</sup>

According to **General Procedure**, the title compound was isolated by flash column chromatography (silica gel, pentane with 8% EtOAc) as a white solid (25.0 mg, 79%,

90% ee).

**<sup>1</sup>H NMR** (400 MHz, CDCl<sub>3</sub>) δ 7.34 (d, *J* = 8.0 Hz, 2H), 7.28 – 7.17 (m, 5H), 7.11 (s, 1H), 7.05 – 6.97 (m, 3H), 6.95 – 6.92 (m, 3H), 6.83 (dd, *J* = 8.1, 1.8 Hz, 1H), 3.59 (q, *J* = 8.0 Hz, 1H), 1.49 (d, *J* = 4.0 Hz, 3H).

**<sup>13</sup>C NMR** (101 MHz, CDCl<sub>3</sub>) δ 172.01, 158.05, 156.90, 143.06, 137.90, 130.52, 129.96, 129.05, 124.45, 123.70, 122.40, 119.92, 119.20, 118.20, 117.64, 48.06, 18.59.

[α]<sub>D</sub><sup>25</sup> = 32.7 (c = 0.71, CHCl<sub>3</sub>).

**HPLC:** The ee was determined to be 90% on a CHIRALPAK IA column at 254 nm, 25 °C, with hexane: *i*PrOH = 90:10 at a flow rate 1.0 mL/min. Retention times: *t*<sub>R</sub> (major) = 9.7 min, *t*<sub>R</sub> (minor) = 11.3 min.

## 27 racemic

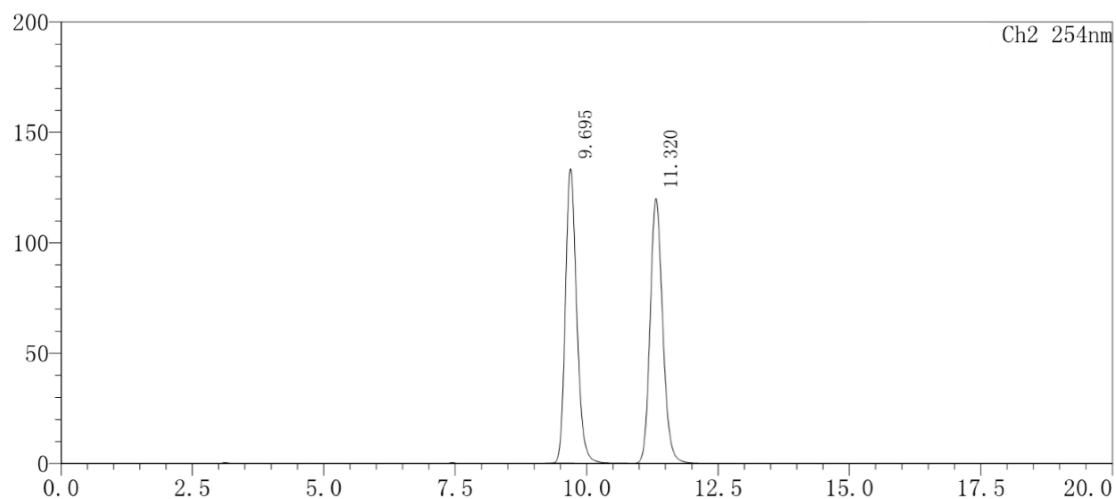

| Peak # | Ret Time [min] | Area [mAU*s] | Height [mAU] | Area [%] |
|--------|----------------|--------------|--------------|----------|
| 1      | 9.695          | 2000239      | 133355       | 49.908   |
| 2      | 11.320         | 2007639      | 120030       | 50.092   |

## 27 enantioenriched, 90% ee

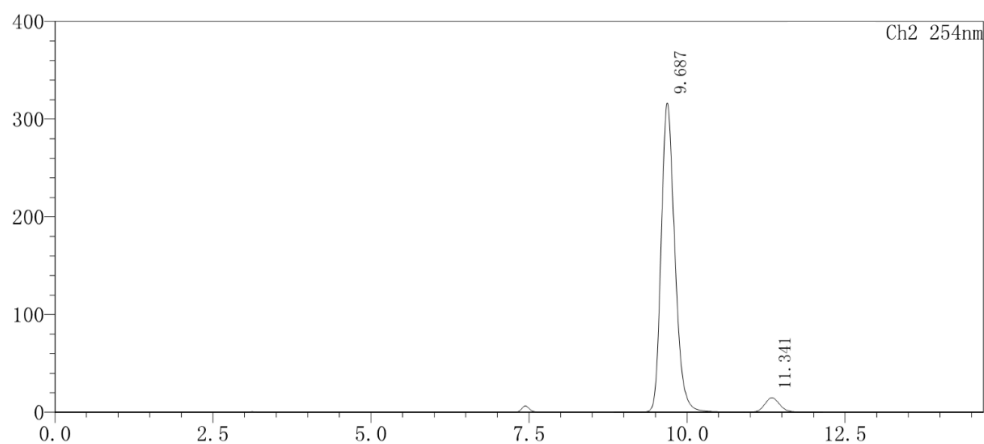

| Peak | Ret Time | Area    | Height | Area   |
|------|----------|---------|--------|--------|
| #    | [min]    | [mAU*s] | [mAU]  | [%]    |
| 1    | 9.687    | 4775495 | 316893 | 94.950 |
| 2    | 11.341   | 253992  | 14985  | 5.050  |

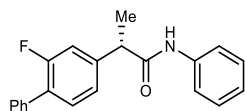

**(S)-2-(2-fluoro-[1,1'-biphenyl]-4-yl)-N-phenylpropanamide (28)** <sup>6</sup>

According to **General Procedure A**, the title compound was isolated by flash column chromatography (silica gel, pentane with 8% EtOAc) as a white solid (16.3 mg, 51%, 91% ee).

**<sup>1</sup>H NMR** (400 MHz, CDCl<sub>3</sub>)  $\delta$  7.56 – 7.54 (m, 2H), 7.49 – 7.43 (m, 5H), 7.40 – 7.36 (m, 1H), 7.30 – 7.19 (m, 5H), 7.12 – 7.10 (m, 1H), 3.74 (q,  $J$  = 8.0 Hz, 1H), 1.63 (d,  $J$  = 8.0 Hz, 3H).

**<sup>13</sup>C NMR** (101 MHz, CDCl<sub>3</sub>)  $\delta$  171.76, 160.03 (d,  $J$  = 249 Hz), 142.41, 137.83, 135.40, 131.42, 129.12, 129.07, 128.63, 128.34 (d,  $J$  = 14 Hz), 127.93, 124.63, 123.74, 120.02, 115.50 (d,  $J$  = 23 Hz), 47.73, 18.76.

**<sup>19</sup>F NMR** (377 MHz, CDCl<sub>3</sub>)  $\delta$  -116.73 (t,  $J$  = 9.3 Hz).

$[\alpha]_D^{25}$  = 33.4 ( $c$  = 1.07, CHCl<sub>3</sub>).

**HPLC:** The ee was determined to be 91% on a CHIRALPAK IA column at 254 nm, 25 °C, with hexane: *i*PrOH = 90:10 at a flow rate 1.0 mL/min. Retention times:  $t_R$  (major) = 10.0 min,  $t_R$  (minor) = 13.6 min.

**28 racemic**

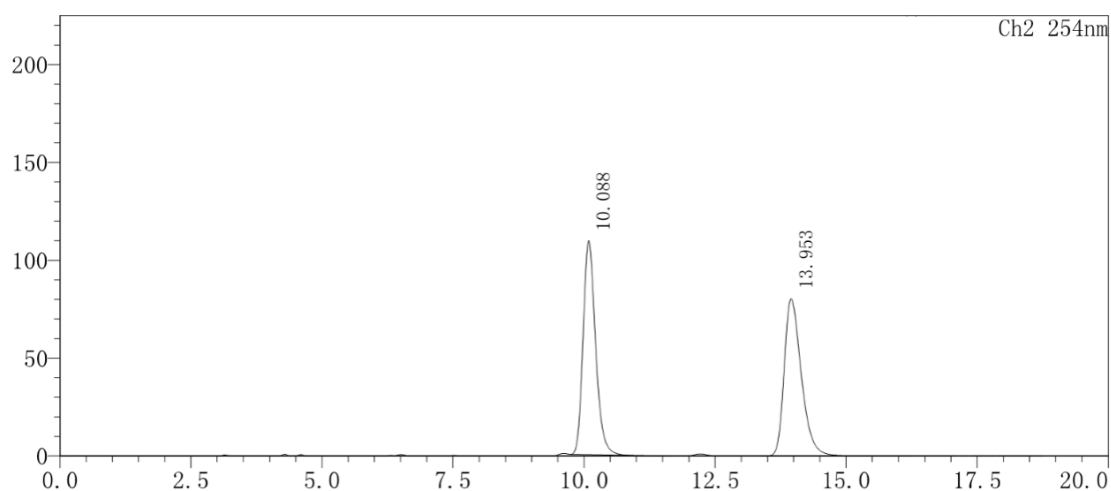

| Peak | Ret Time | Area    | Height | Area   |
|------|----------|---------|--------|--------|
| #    | [min]    | [mAU*s] | [mAU]  | [%]    |
| 1    | 10.088   | 1798764 | 109213 | 49.394 |
| 2    | 13.953   | 1842931 | 80568  | 50.606 |

**28 enantioenriched, 91% ee**

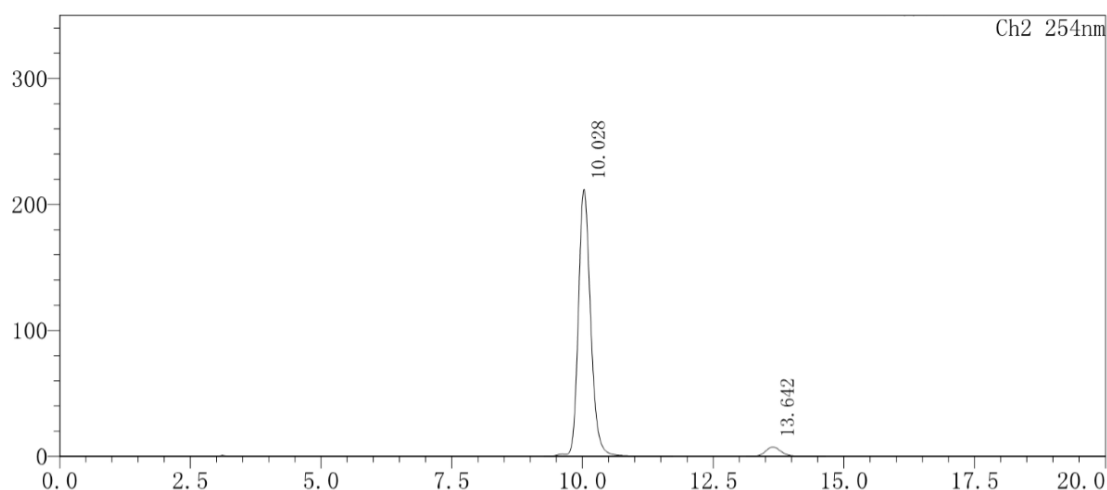

| Peak | Ret Time | Area    | Height | Area   |
|------|----------|---------|--------|--------|
| #    | [min]    | [mAU*s] | [mAU]  | [%]    |
| 1    | 10.028   | 3450426 | 212142 | 95.601 |
| 2    | 13.642   | 158761  | 7521   | 4.399  |

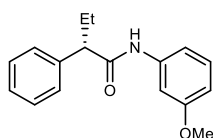

**(S)-N-(3-methoxyphenyl)-2-phenylbutanamide (29)**

According to **General Procedure**, the title compound was isolated by flash column chromatography (silica gel, pentane with 9% EtOAc) as a white solid (21.0 mg, 78%, 91% ee).

**<sup>1</sup>H NMR** (400 MHz, CDCl<sub>3</sub>) δ 7.29 – 7.26 (m, 3H), 7.23 – 7.17 (m, 3H), 7.05 (t, *J* = 8.0 Hz, 1H), 6.77 (d, *J* = 8.0 Hz, 1H), 6.53 (dd, *J* = 8.2, 2.0 Hz, 1H), 3.67 (s, 3H), 3.30 (t, *J* = 8.0 Hz, 2H), 2.23 – 2.12 (m, 1H), 1.83 – 1.72 (m, 1H), 0.84 (t, *J* = 8.0 Hz, 3H).

**<sup>13</sup>C NMR** (101 MHz, CDCl<sub>3</sub>) δ 171.87, 160.26, 139.58, 139.27, 129.67, 129.15, 128.18, 127.65, 111.84, 110.40, 105.40, 56.38, 55.42, 26.53, 12.47.

**HRMS** (ESI):  $C_{17}H_{20}NO_2^+$  ( $M+H^+$ ): 270.1489, found: 270.1486.

$[\alpha]_D^{25} = 65.3$  ( $c = 0.75$ ,  $CHCl_3$ ).

**HPLC**: The ee was determined to be 91% on a CHIRALPAK IA column at 254 nm, 25 °C, with hexane: *i*PrOH = 90:10 at a flow rate 1.0 mL/min. Retention times:  $t_R$  (major) = 10.0 min,  $t_R$  (minor) = 12.2 min.

### 29 racemic

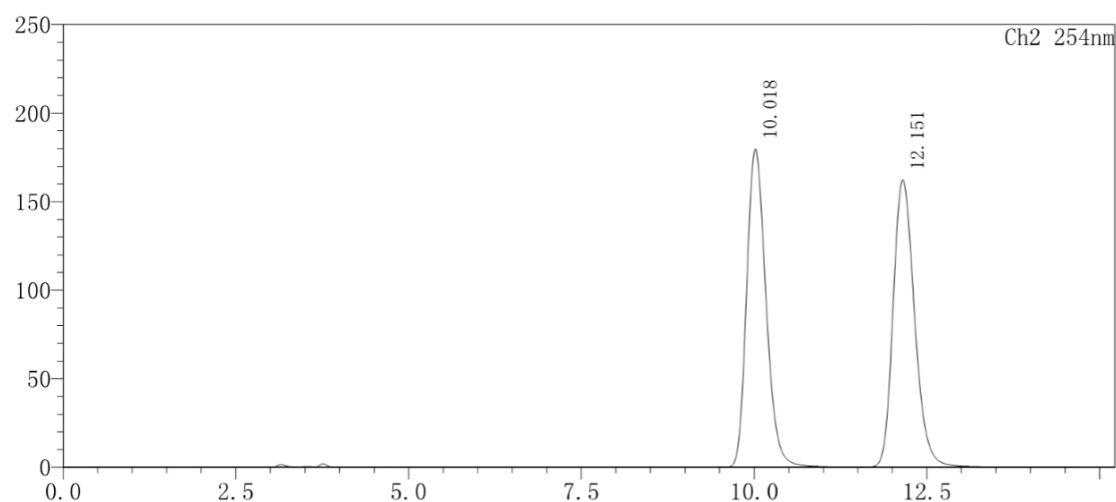

| Peak # | Ret Time [min] | Area [mAU*s] | Height [mAU] | Area [%] |
|--------|----------------|--------------|--------------|----------|
| 1      | 10.018         | 3510643      | 179878       | 49.987   |
| 2      | 12.151         | 3512531      | 162320       | 50.013   |

### 29 enantioenriched, 91% ee

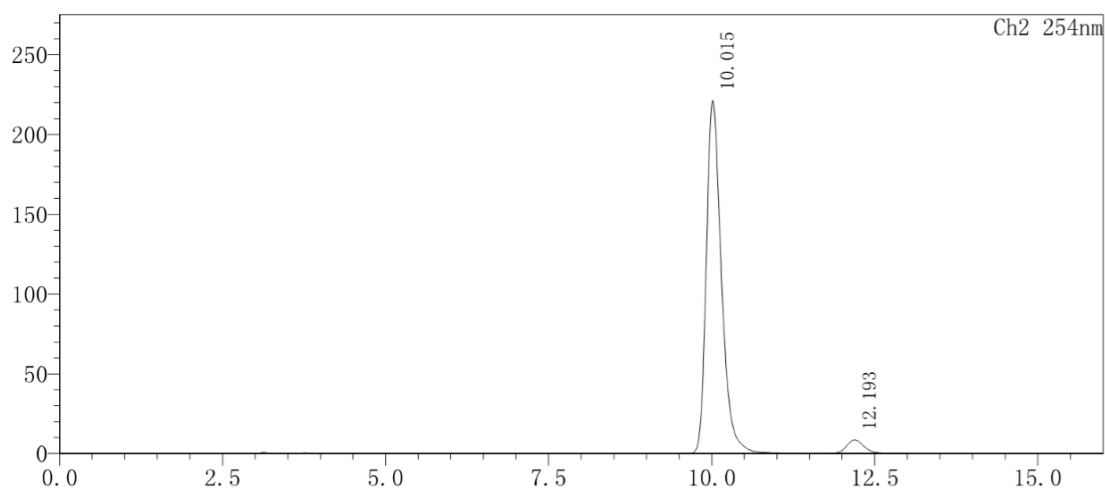

| Peak # | Ret Time [min] | Area [mAU*s] | Height [mAU] | Area [%] |
|--------|----------------|--------------|--------------|----------|
| 1      | 10.015         | 3579766      | 221524       | 95.700   |
| 2      | 12.193         | 160856       | 8603         | 4.300    |



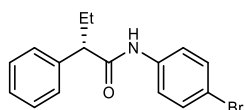

**(S)-N-(4-bromophenyl)-2-phenylbutanamide (30)**

According to **General Procedure**, the title compound was isolated by flash column chromatography (silica gel, pentane with 7% EtOAc) as a white solid (16.5 mg, 52%, 94% ee).

**<sup>1</sup>H NMR** (400 MHz, CDCl<sub>3</sub>) δ 7.39 – 7.34 (m, 7H), 7.33 – 7.28 (m, 2H), 7.12 (s, 1H), 3.38 (t, *J* = 8.0 Hz, 1H), 2.33 – 2.21 (m, 1H), 1.92 – 1.81 (m, 1H), 0.92 (t, *J* = 8.0 Hz, 3H).

**<sup>13</sup>C NMR** (101 MHz, CDCl<sub>3</sub>) δ 171.89, 139.37, 137.05, 131.99, 129.23, 128.19, 127.79, 121.44, 116.92, 56.28, 26.50, 12.45.

**HRMS** (ESI): C<sub>16</sub>H<sub>16</sub>BrNNaO<sup>+</sup> (*M*+Na<sup>+</sup>): 340.0307, found: 340.0306.

[α]<sub>D</sub><sup>25</sup> = 43.0 (*c* = 0.92, CHCl<sub>3</sub>).

**HPLC**: The ee was determined to be 94% on a CHIRALPAK IA column at 254 nm, 25 °C, with hexane: *i*PrOH = 90:10 at a flow rate 1.0 mL/min. Retention times: *t*<sub>R</sub> (major) = 9.5 min, *t*<sub>R</sub> (minor) = 12.2 min.

**30 racemic**

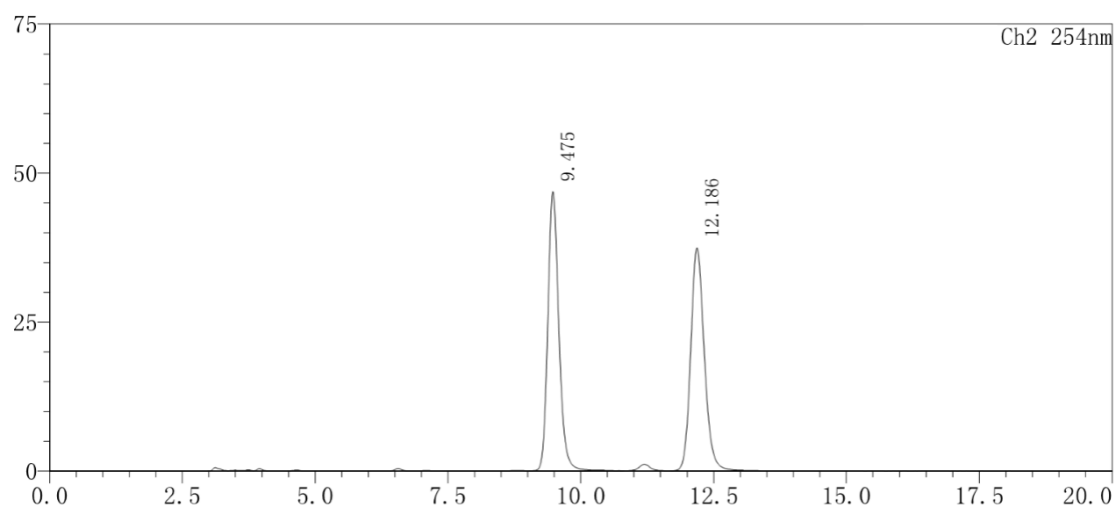

| Peak # | Ret Time [min] | Area [mAU*s] | Height [mAU] | Area [%] |
|--------|----------------|--------------|--------------|----------|
| 1      | 9.475          | 676851       | 46865        | 50.380   |
| 2      | 12.186         | 666634       | 37406        | 49.620   |

**30 enantioenriched, 94% ee**

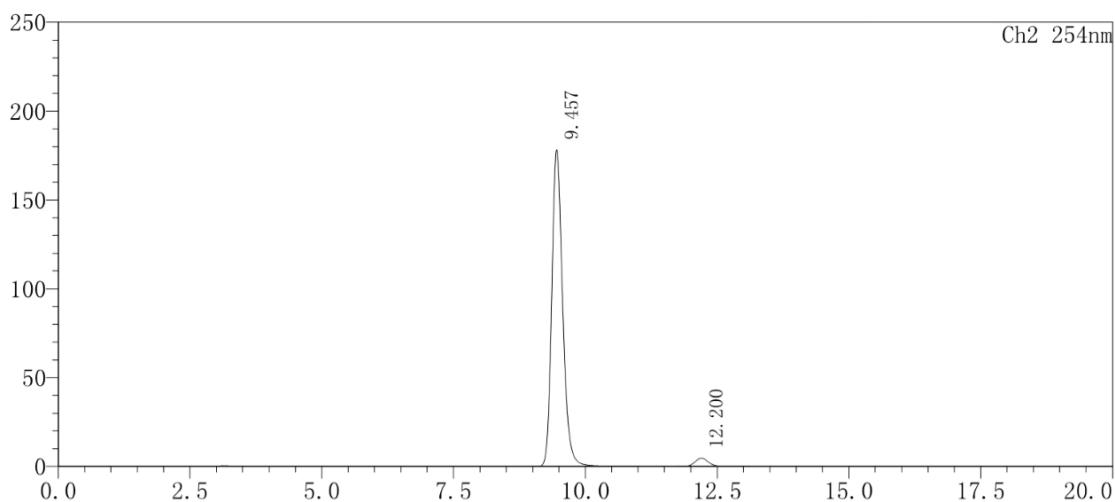

| Peak # | Ret Time [min] | Area [mAU*s] | Height [mAU] | Area [%] |
|--------|----------------|--------------|--------------|----------|
| 1      | 9.457          | 2568744      | 178382       | 96.826   |
| 2      | 12.200         | 84207        | 4720         | 3.174    |

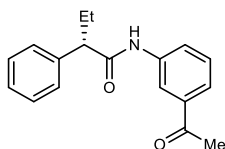

### (S)-N-(3-acetylphenyl)-2-phenylbutanamide (31)

According to **General Procedure**, the title compound was isolated by flash column chromatography (silica gel, pentane with 10% EtOAc) as a white solid (17.7 mg, 63%, 91% ee).

**<sup>1</sup>H NMR** (400 MHz, CDCl<sub>3</sub>) δ 7.93 (s, 1H), 7.81 (d, *J* = 8.0 Hz, 1H), 7.65 (d, *J* = 8.0 Hz, 1H), 7.40 – 7.35 (m, 5H), 7.33 – 7.29 (m, 1H), 3.42 (t, *J* = 8.0 Hz, 1H), 2.58 (s, 3H), 2.32 – 2.23 (m, 1H), 1.94 – 1.83 (m, 1H), 0.93 (t, *J* = 8.0 Hz, 3H).

**<sup>13</sup>C NMR** (101 MHz, CDCl<sub>3</sub>) δ 198.05, 172.14, 139.33, 138.53, 137.87, 129.41, 129.29, 128.20, 127.84, 124.44, 124.24, 119.23, 56.33, 26.84, 26.46, 12.47.

**HRMS** (ESI): C<sub>18</sub>H<sub>20</sub>NO<sub>2</sub><sup>+</sup> (M+H<sup>+</sup>): 282.1489, found: 282.1490.

[α]<sub>D</sub><sup>25</sup> = 46.1 (c = 1.15, CHCl<sub>3</sub>).

**HPLC**: The ee was determined to be 91% on a CHIRALPAK ADH column at 254 nm, 25 °C, with hexane: *i*PrOH = 70:30 at a flow rate 1.0 mL/min. Retention times: *t*<sub>R</sub> (major) = 21.9 min, *t*<sub>R</sub> (minor) = 27.6 min.

### 31 racemic

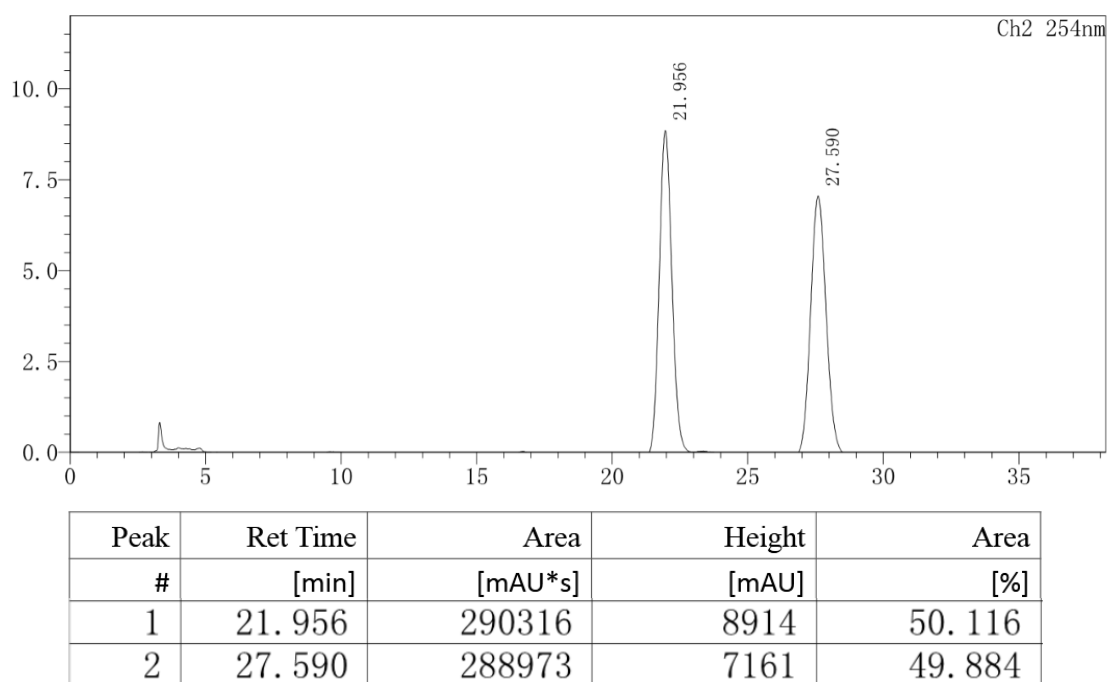

**31 enantioenriched, 91% ee**

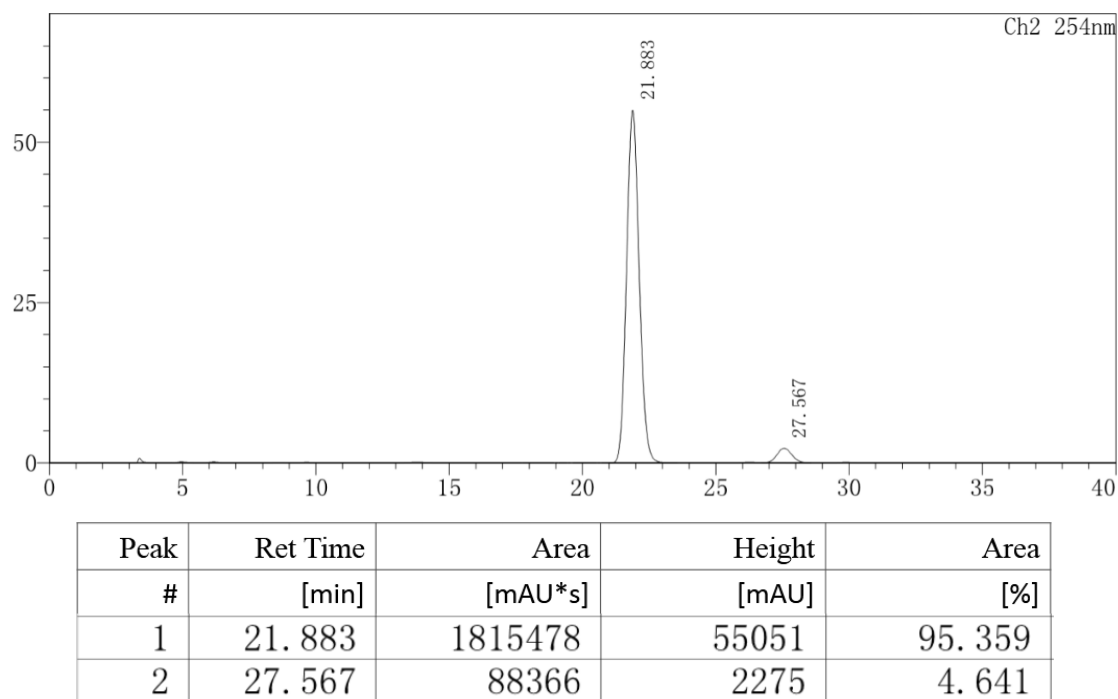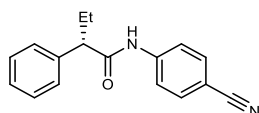

**(S)-N-(4-cyanophenyl)-2-phenylbutanamide (32)**

According to **General Procedure**, the title compound was isolated by flash column chromatography (silica gel, pentane with 9% EtOAc) as a yellow oil (10.8 mg, 41%, 92%

ee).

**<sup>1</sup>H NMR** (400 MHz, CDCl<sub>3</sub>) δ 7.59 – 7.53 (m, 4H), 7.40 – 7.38 (m, 1H), 7.37 – 7.36 (m, 1H), 7.35 – 7.34 (m, 1H), 7.33 – 7.29 (m, 2H), 3.42 (t, *J* = 8.0 Hz 1H), 2.31 – 2.21 (m, 1H), 1.92 – 1.81 (m, 1H), 0.92 (t, *J* = 8.0 Hz, 3H).

**<sup>13</sup>C NMR** (101 MHz, CDCl<sub>3</sub>) δ 172.26, 142.06, 138.97, 133.32, 129.34, 128.15, 127.97, 119.60, 118.96, 107.13, 56.35, 26.45, 12.38.

**HRMS** (ESI): C<sub>17</sub>H<sub>17</sub>N<sub>2</sub>O<sup>+</sup> (M+H<sup>+</sup>): 265.1335, found: 265.1334.

[α]<sub>D</sub><sup>25</sup> = 51.2 (c = 0.93, CHCl<sub>3</sub>).

**HPLC**: The ee was determined to be 92% on a CHIRALPAK IA column at 254 nm, 25 °C, with hexane: *i*PrOH = 90:10 at a flow rate 1.0 mL/min. Retention times: *t*<sub>R</sub> (major) = 13.5 min, *t*<sub>R</sub> (minor) = 16.8 min.

### 32 racemic

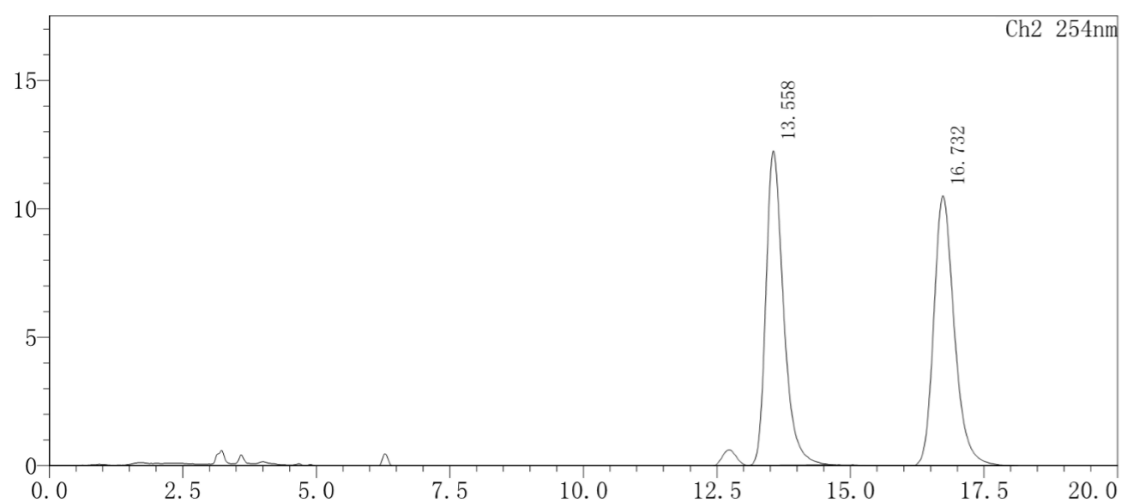

| Peak # | Ret Time [min] | Area [mAU*s] | Height [mAU] | Area [%] |
|--------|----------------|--------------|--------------|----------|
| 1      | 13.558         | 279824       | 12237        | 49.800   |
| 2      | 16.732         | 282074       | 10510        | 50.200   |

### 32 enantioenriched, 92% ee

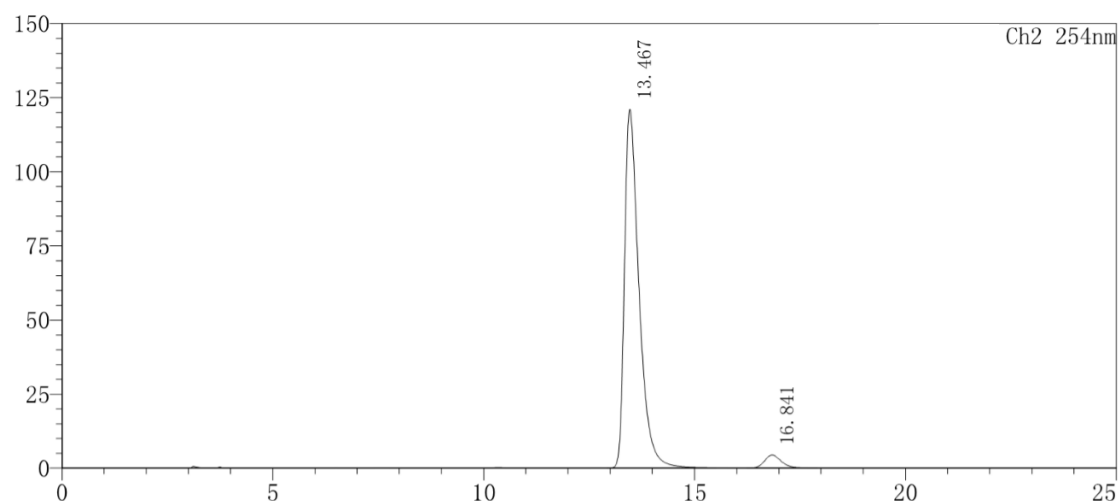

| Peak # | Ret Time [min] | Area [mAU*s] | Height [mAU] | Area [%] |
|--------|----------------|--------------|--------------|----------|
| 1      | 13.467         | 2909119      | 121093       | 95.943   |
| 2      | 16.841         | 123008       | 4399         | 4.057    |

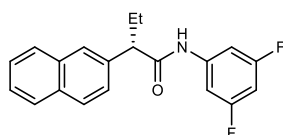

**(S)-N-(3,5-difluorophenyl)-2-(naphthalen-2-yl)butanamide (33)**

According to **General Procedure**, the title compound was isolated by flash column chromatography (silica gel, pentane with 9% EtOAc) as a yellow oil (17.6 mg, 54%, 94% ee).

**<sup>1</sup>H NMR** (400 MHz, CDCl<sub>3</sub>) δ 7.88 – 7.82 (m, 3H), 7.78 (s, 1H), 7.54 – 7.48 (m, 2H), 7.46 – 7.43 (m, 1H), 7.20 (s, 1H), 7.06 – 7.04 (m, 2H), 6.52 – 6.47 (m, 1H), 3.55 (t, *J* = 8.0 Hz, 1H), 2.40 – 2.29 (m, 1H), 2.02 – 1.91 (m, 1H), 0.94 (t, *J* = 8.0 Hz, 3H).

**<sup>13</sup>C NMR** (101 MHz, CDCl<sub>3</sub>) δ 172.02, 163.21 (dd, *J* = 247.5, 15.2 Hz), 140.03 (t, *J* = 13 Hz), 139.90, 136.40, 133.64, 132.97, 129.29, 127.89, 127.34, 126.71, 126.38, 125.64, 102.79 (d, *J* = 29.3 Hz) 99.57 (t, *J* = 25.3 Hz), 56.37, 26.26, 12.41.

**<sup>19</sup>F NMR** (377 MHz, CDCl<sub>3</sub>) δ -108.90 (s).

**HRMS** (ESI): C<sub>20</sub>H<sub>17</sub>F<sub>2</sub>NNaO<sup>+</sup> (*M*+Na<sup>+</sup>): 348.1170, found: 348.1168.

[α]<sub>D</sub><sup>25</sup> = 46.9 (*c* = 1.27, CHCl<sub>3</sub>).

**HPLC**: The ee was determined to be 94% on a CHIRALPAK ADH column at 254 nm, 25 °C, with hexane: *i*PrOH = 90:10 at a flow rate 1.0 mL/min. Retention times: *t*<sub>R</sub> (major) = 5.9 min, *t*<sub>R</sub> (minor) = 7.7 min.

### 33 racemic

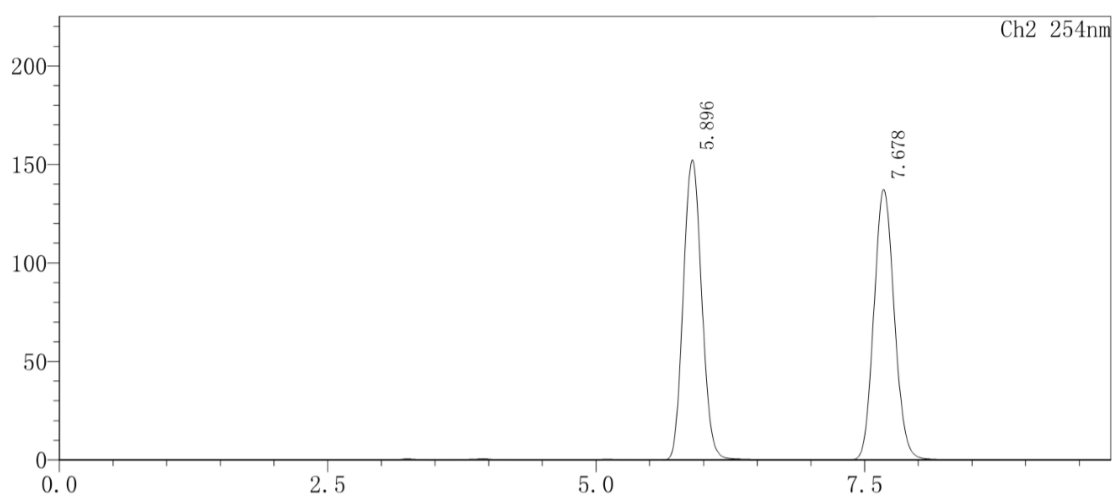

| Peak # | Ret Time [min] | Area [mAU*s] | Height [mAU] | Area [%] |
|--------|----------------|--------------|--------------|----------|
| 1      | 5.896          | 1815094      | 152048       | 50.050   |
| 2      | 7.678          | 1811449      | 137308       | 49.950   |

### 33 enantioenriched, 94% ee

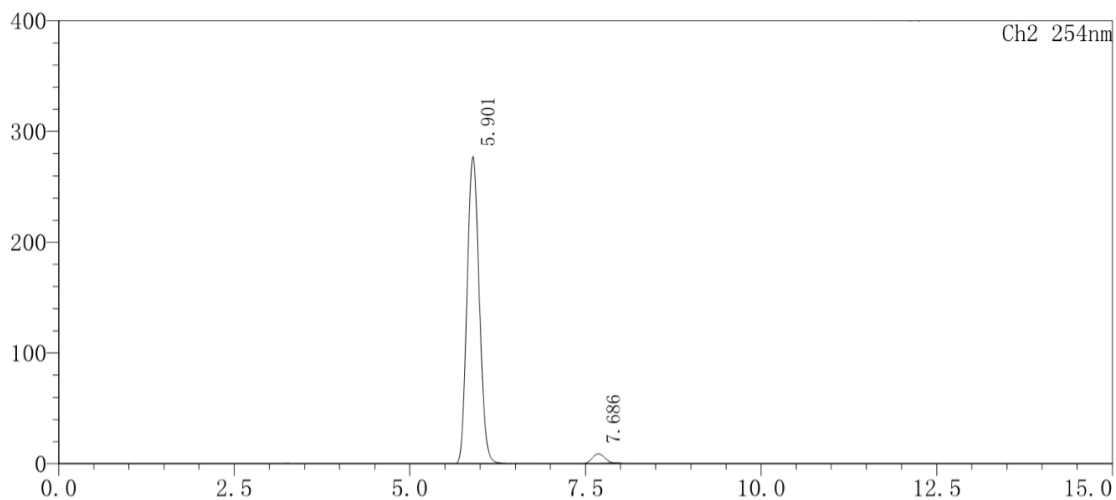

| Peak # | Ret Time [min] | Area [mAU*s] | Height [mAU] | Area [%] |
|--------|----------------|--------------|--------------|----------|
| 1      | 5.901          | 3309594      | 277317       | 96.996   |
| 2      | 7.686          | 102512       | 8442         | 3.004    |

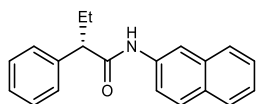

**(S)-N-(naphthalen-2-yl)-2-phenylbutanamide (34)**

According to **General Procedure**, the title compound was isolated by flash column chromatography (silica gel, pentane with 9% EtOAc) as a white solid (19.7 mg, 68%, 91% ee).

**<sup>1</sup>H NMR** (400 MHz, CDCl<sub>3</sub>) δ 8.18 (s, 1H), 7.75 – 7.70 (m, 3H), 7.45 – 7.39 (m, 4H), 7.38 – 7.29 (m, 4H), 3.46 (t, *J* = 8.0 Hz, 1H), 2.37 – 2.27 (m, 1H), 1.97 – 1.86 (m, 1H), 0.96 (t, *J* = 8.0 Hz, 3H).

**<sup>13</sup>C NMR** (101 MHz, CDCl<sub>3</sub>) δ 172.16, 139.63, 135.41, 133.90, 130.71, 129.16, 128.73, 128.22, 127.74, 127.66, 127.61, 126.58, 125.08, 119.94, 116.70, 56.31, 26.62, 12.49.

**HRMS** (ESI): C<sub>20</sub>H<sub>20</sub>NO<sup>+</sup> (*M*+H<sup>+</sup>): 290.1539, found: 290.1537.

[α]<sub>D</sub><sup>25</sup> = 79.2 (*c* = 1.04, CHCl<sub>3</sub>).

**HPLC**: The ee was determined to be 91% on a CHIRALPAK IA column at 254 nm, 25 °C, with hexane: *i*-PrOH = 90:10 at a flow rate 1.0 mL/min. Retention times: *t*<sub>R</sub> (major) = 12.8 min, *t*<sub>R</sub> (minor) = 18.4 min.

**34 racemic**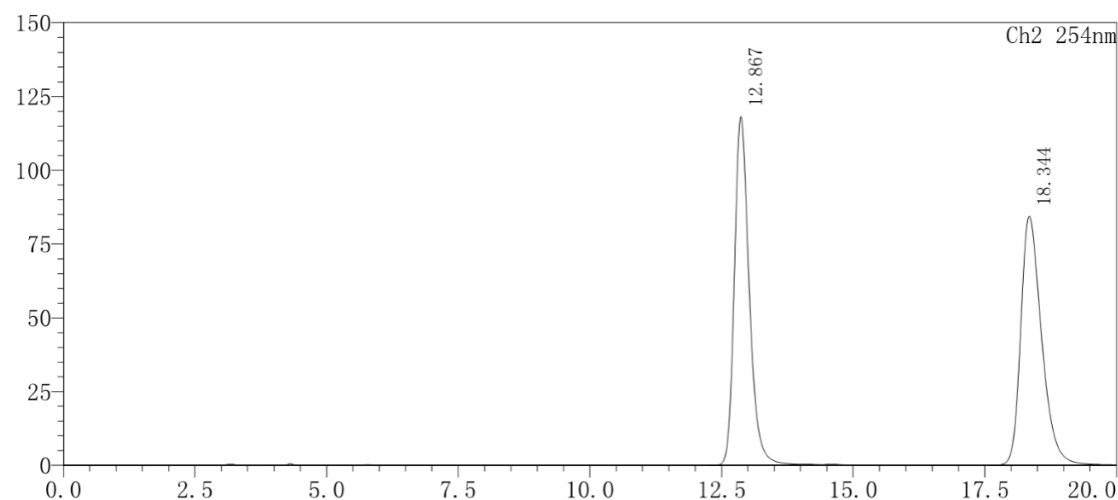

| Peak # | Ret Time [min] | Area [mAU*s] | Height [mAU] | Area [%] |
|--------|----------------|--------------|--------------|----------|
| 1      | 12.867         | 2322790      | 118192       | 49.960   |
| 2      | 18.344         | 2326474      | 84436        | 50.040   |

**34 enantioenriched, 91% ee**

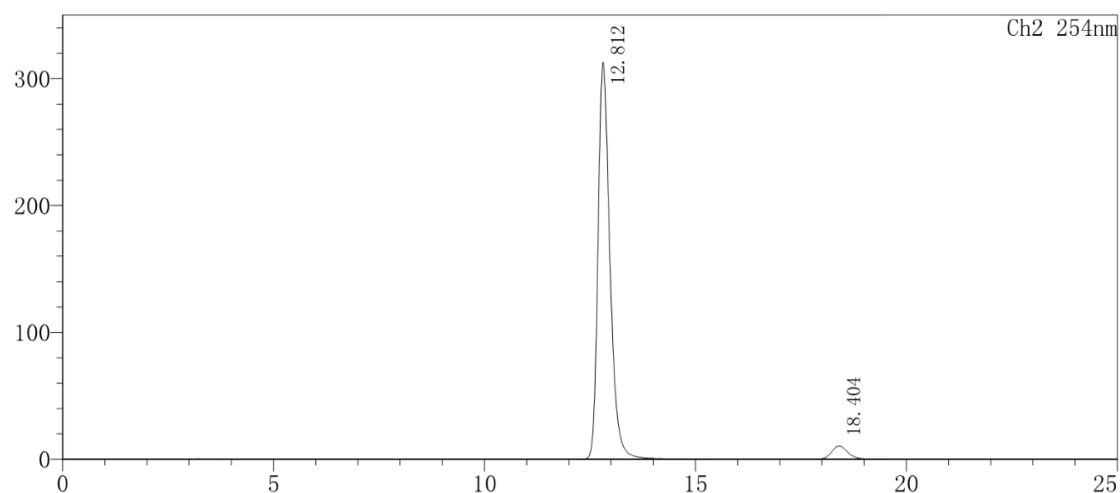

| Peak # | Ret Time [min] | Area [mAU*s] | Height [mAU] | Area [%] |
|--------|----------------|--------------|--------------|----------|
| 1      | 12.812         | 6162824      | 312899       | 95.565   |
| 2      | 18.404         | 285996       | 10547        | 4.435    |

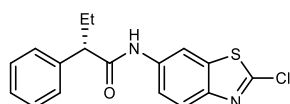

### (S)-N-(2-chlorobenzo[d]thiazol-6-yl)-2-phenylbutanamide (**35**)

According to **General Procedure A**, the title compound was isolated by flash column chromatography (silica gel, pentane with 6% EtOAc) as a white solid (18.2 mg, 55%, 91% ee).

**<sup>1</sup>H NMR** (400 MHz, CDCl<sub>3</sub>) δ 7.95 (s, 1H), 7.62 – 7.60(m, 2H), 7.47 (s, 1H), 7.37 – 7.36 (m, 3H), 7.32 – 7.28 (m, 1H), 3.44 (t, *J* = 8.0 Hz, 1H), 2.37 – 2.23 (m, 1H), 1.94 – 1.83 (m, 1H), 0.93 (t, *J* = 8.0 Hz, 3H).

**<sup>13</sup>C NMR** (101 MHz, CDCl<sub>3</sub>) δ 172.19, 154.34, 151.48, 139.45, 137.19, 131.48, 129.17, 128.18, 127.72, 121.25, 119.04, 113.86, 56.19, 26.61, 12.45.

**HRMS** (ESI): C<sub>17</sub>H<sub>16</sub>ClN<sub>2</sub>OS<sup>+</sup> (M+H<sup>+</sup>): 331.0666, found: 331.0661.

[α]<sub>D</sub><sup>25</sup> = 17.2 (c = 0.77, CHCl<sub>3</sub>).

**HPLC**: The ee was determined to be 91% on a CHIRALPAK IA column at 254 nm, 25 °C, with hexane: *i*-PrOH = 90:10 at a flow rate 1.0 mL/min. Retention times: *t*<sub>R</sub> (major) = 10.1 min, *t*<sub>R</sub> (minor) = 14.4 min.

### **35 racemic**



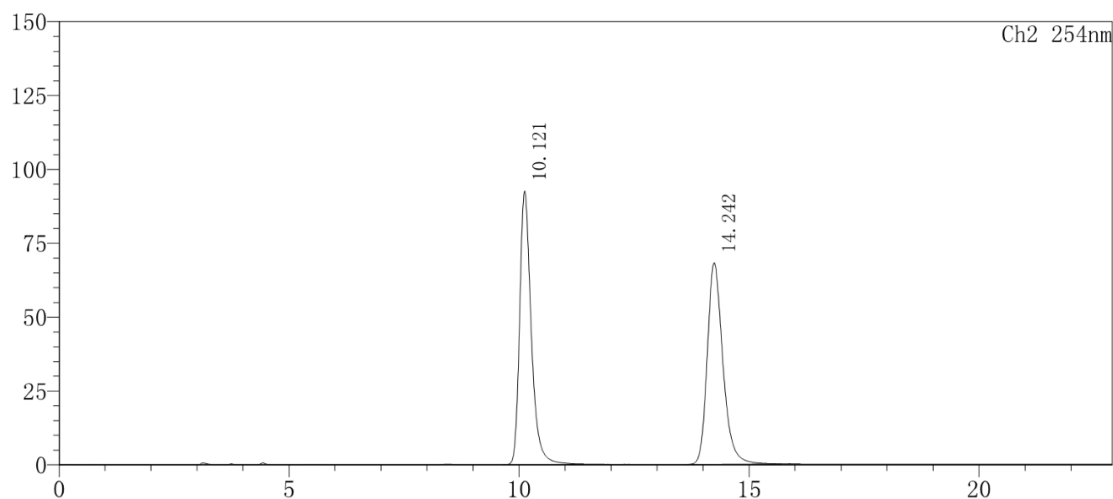

| Peak # | Ret Time [min] | Area [mAU*s] | Height [mAU] | Area [%] |
|--------|----------------|--------------|--------------|----------|
| 1      | 10.121         | 1629442      | 92616        | 50.213   |
| 2      | 14.242         | 1615616      | 68185        | 49.787   |

**35 enantioenriched, 91% ee**

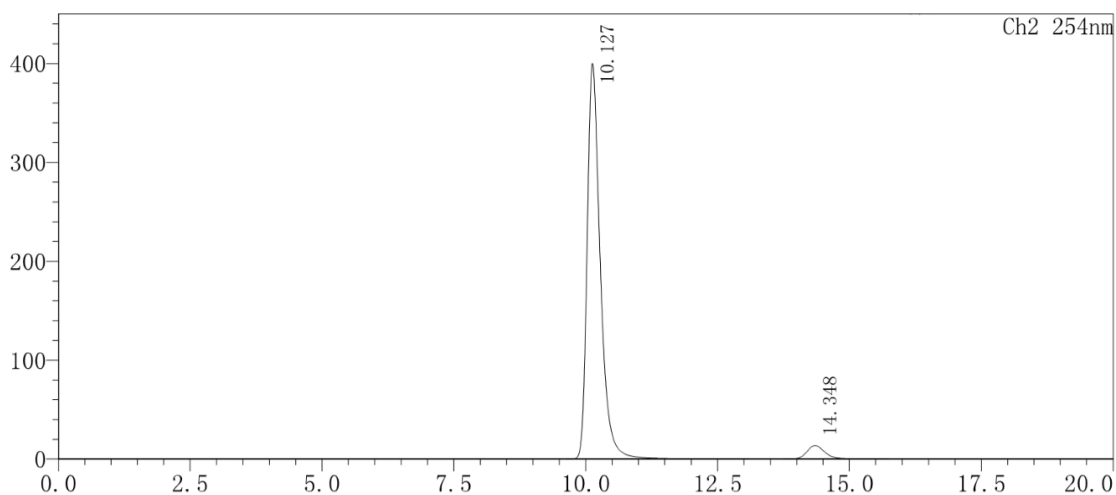

| Peak # | Ret Time [min] | Area [mAU*s] | Height [mAU] | Area [%] |
|--------|----------------|--------------|--------------|----------|
| 1      | 10.127         | 6930657      | 400143       | 95.432   |
| 2      | 14.348         | 331752       | 13736        | 4.568    |

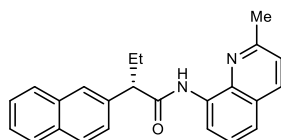

**(S)-N-(2-methylquinolin-8-yl)-2-(naphthalen-2-yl)butanamide (36)**

According to **General Procedure**, the title compound was isolated by flash column

chromatography (silica gel, pentane with 6% EtOAc) as a white solid (14.9 mg, 42%, 92% ee).

**<sup>1</sup>H NMR** (400 MHz, CDCl<sub>3</sub>) δ 9.98 (s, 1H), 8.72 (dd, *J* = 7.4, 1.5 Hz, 1H), 7.96 – 7.83 (m, 5H), 7.60 (dd, *J* = 8.5, 1.6 Hz, 1H), 7.52 – 7.45 (m, 2H), 7.43 – 7.36 (m, 2H), 7.17 (d, *J* = 12 Hz, 1H), 3.84 – 3.80 (m, 1H), 2.56 – 2.45 (m, 1H), 2.34 (s, 3H), 2.18 – 2.05 (m, 1H), 1.04 (t, *J* = 8.0 Hz, 3H).

**<sup>13</sup>C NMR** (101 MHz, CDCl<sub>3</sub>) δ 172.17, 157.11, 137.88, 137.17, 136.28, 133.94, 133.84, 132.97, 128.91, 127.99, 127.80, 127.57, 126.35, 126.33, 125.99, 122.35, 121.27, 116.15, 56.89, 25.93, 24.85, 12.67.

**HRMS** (ESI): C<sub>24</sub>H<sub>23</sub>N<sub>2</sub>O<sup>+</sup> (*M*+H<sup>+</sup>): 355.1805, found: 355.1800.

[α]<sub>D</sub><sup>25</sup> = 78.1 (*c* = 0.92, CHCl<sub>3</sub>).

**HPLC**: The ee was determined to be 92% on a CHIRALPAK ADH column at 254 nm, 25 °C, with hexane: *i*PrOH = 97:3 at a flow rate 1.0 mL/min. Retention times: *t*<sub>R</sub> (major) = 19.4 min, *t*<sub>R</sub> (minor) = 20.8 min.

### 36 racemic

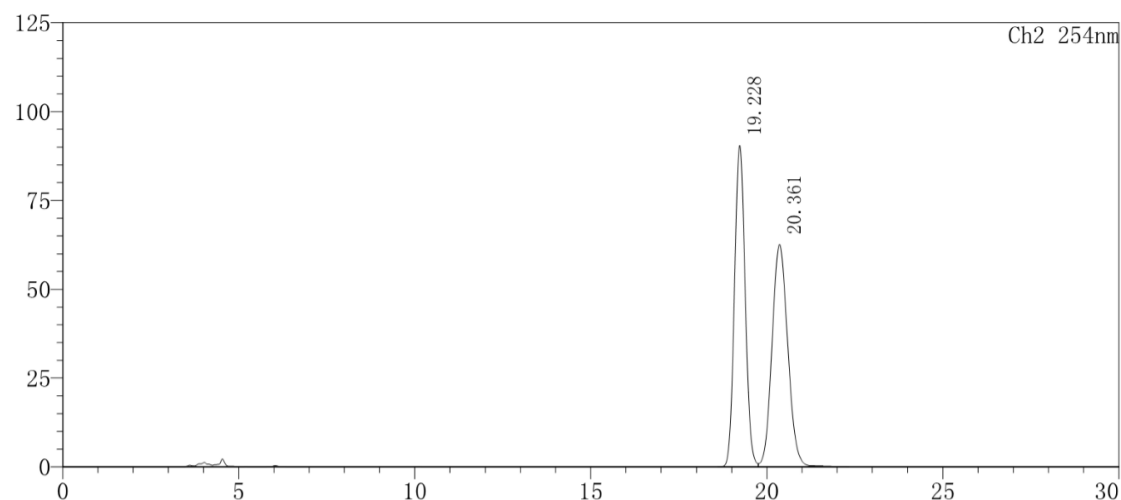

| Peak # | Ret Time [min] | Area [mAU*s] | Height [mAU] | Area [%] |
|--------|----------------|--------------|--------------|----------|
| 1      | 19.228         | 1911191      | 90455        | 49.438   |
| 2      | 20.361         | 1954607      | 62617        | 50.562   |

### 36 enantioenriched, 92% ee

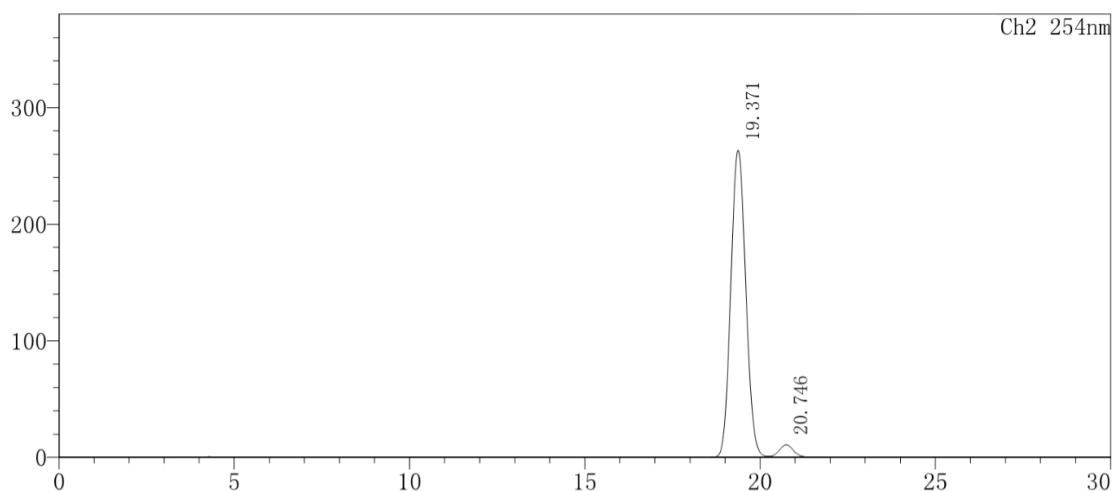

| Peak # | Ret Time [min] | Area [mAU*s] | Height [mAU] | Area [%] |
|--------|----------------|--------------|--------------|----------|
| 1      | 19.371         | 7844601      | 263369       | 96.134   |
| 2      | 20.746         | 315432       | 10889        | 3.866    |

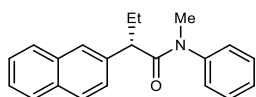

**(S)-N-methyl-2-(naphthalen-2-yl)-N-phenylbutanamide (37)**

According to **General Procedure**, the title compound was isolated by flash column chromatography (silica gel, pentane with 3% EtOAc) as a colorless oil (20.0 mg, 66%, 92% ee).

**<sup>1</sup>H NMR** (400 MHz, CDCl<sub>3</sub>) δ 7.80 – 7.78 (m, 1H), 7.72 (d, *J* = 8.0 Hz, 2H), 7.46 – 7.41 (m, 3H), 7.37 – 7.36 (m, 3H), 7.24 (d, *J* = 8.0 Hz, 1H), 6.99 (s, 2H), 3.53 (t, *J* = 8.0 Hz, 1H), 3.26 (s, 3H), 2.24 – 2.13 (m, 1H), 1.82 – 1.72 (m, 1H), 0.84 (t, *J* = 8.0 Hz, 3H).

**<sup>13</sup>C NMR** (101 MHz, CDCl<sub>3</sub>) δ 173.37, 143.91, 137.99, 133.48, 132.56, 129.65, 128.21, 128.02, 127.99, 127.89, 127.64, 126.85, 126.52, 125.92, 125.59, 51.06, 37.75, 28.43, 12.51.

**HRMS** (ESI): C<sub>21</sub>H<sub>22</sub>NO<sup>+</sup> (*M*+H<sup>+</sup>): 304.1696, found: 304.1692.

[α]<sub>D</sub><sup>25</sup> = -90.4 (*c* = 1.02, CHCl<sub>3</sub>).

**HPLC**: The ee was determined to be 92% on a CHIRALPAK ADH column at 254 nm, 25 °C, with hexane: *i*PrOH = 90:10 at a flow rate 1.0 mL/min. Retention times: *t*<sub>R</sub> (major) = 6.4 min, *t*<sub>R</sub> (minor) = 9.4 min.

**37 racemic**

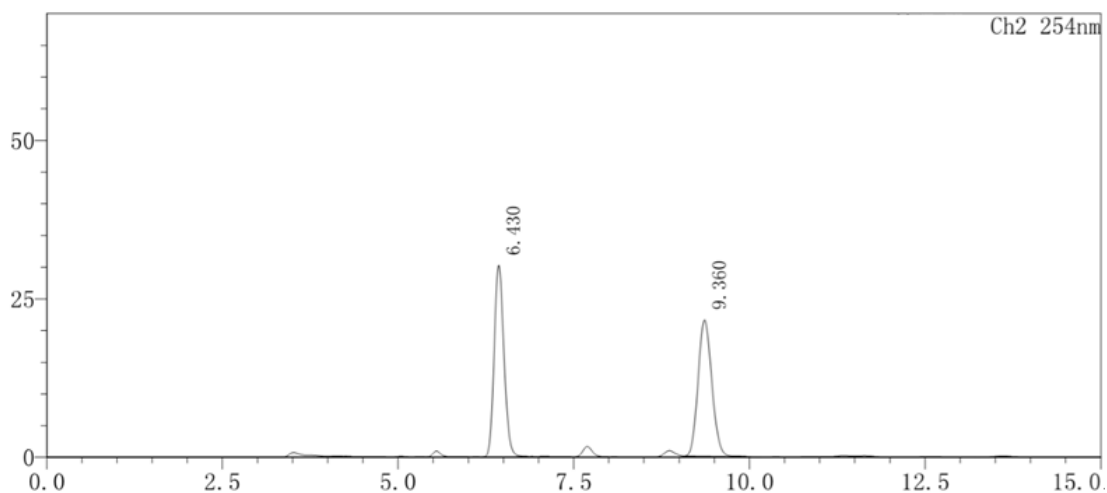

| Peak # | Ret Time [min] | Area [mAU*s] | Height [mAU] | Area [%] |
|--------|----------------|--------------|--------------|----------|
| 1      | 6.430          | 293527       | 30209        | 49.857   |
| 2      | 9.360          | 295215       | 21547        | 50.143   |

**37 enantioenriched, 92% ee**

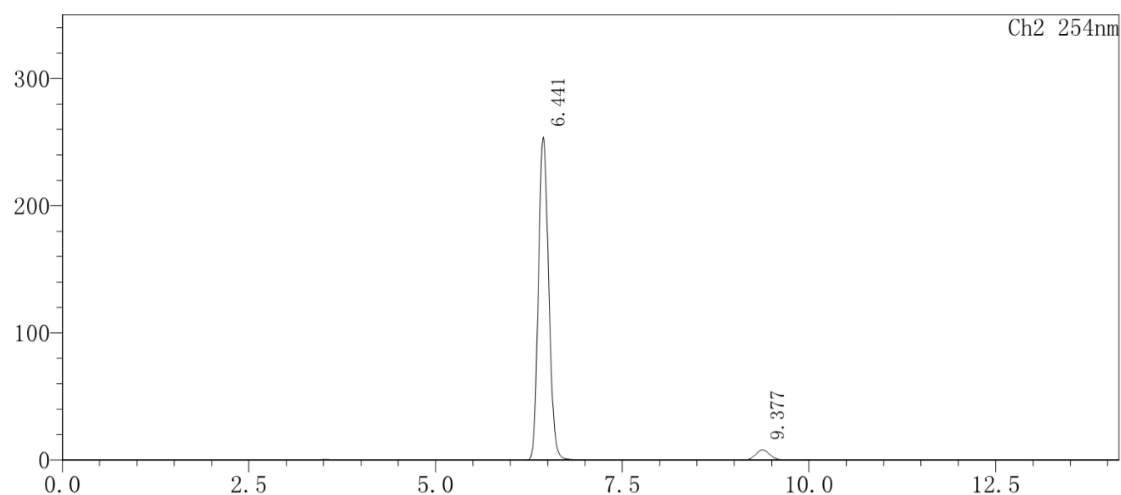

| Peak # | Ret Time [min] | Area [mAU*s] | Height [mAU] | Area [%] |
|--------|----------------|--------------|--------------|----------|
| 1      | 6.441          | 2433998      | 254211       | 95.761   |
| 2      | 9.377          | 107744       | 8080         | 4.239    |

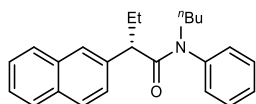

**(S)-N-butyl-2-(naphthalen-2-yl)-N-phenylbutanamide (38)**

According to **General Procedure**, the title compound was isolated by flash column chromatography (silica gel, pentane with 2.5% EtOAc) as a yellow oil (14.8 mg, 43%,

92% ee).

**<sup>1</sup>H NMR** (400 MHz, CDCl<sub>3</sub>) δ 7.71 – 7.69 (m, 1H), 7.63 – 7.61 (m, 2H), 7.37 – 7.28 (m, 6H), 7.17 – 6.86 (m, 3H), 3.68 – 3.52 (m, 2H), 3.35 (t, *J* = 8.0 Hz, 1H), 2.14 – 2.04 (m, 1H), 1.70 – 1.59 (m, 1H), 1.40 – 1.33 (m, 2H), 1.24 – 1.15 (m, 2H), 0.80 – 0.73 (m, 6H).

**<sup>13</sup>C NMR** (101 MHz, CDCl<sub>3</sub>) δ 172.84, 142.51, 138.22, 133.49, 132.55, 129.49, 129.24, 128.03, 127.95, 127.90, 127.64, 126.84, 126.58, 125.89, 125.56, 51.45, 49.43, 29.94, 28.53, 20.14, 13.92, 12.57.

**HRMS** (ESI): C<sub>24</sub>H<sub>28</sub>NO<sup>+</sup> (*M*+H<sup>+</sup>): 346.2165, found: 346.2160.

[α]<sub>D</sub><sup>25</sup> = -23.5 (*c* = 0.78, CHCl<sub>3</sub>).

**HPLC**: The ee was determined to be 92% on a CHIRALPAK ADH column at 254 nm, 25 °C, with hexane: *i*PrOH = 99.8:0.2 at a flow rate 1.0 mL/min. Retention times: *t*<sub>R</sub> (major) = 23.5 min, *t*<sub>R</sub> (minor) = 20.0 min.

### 38 racemic

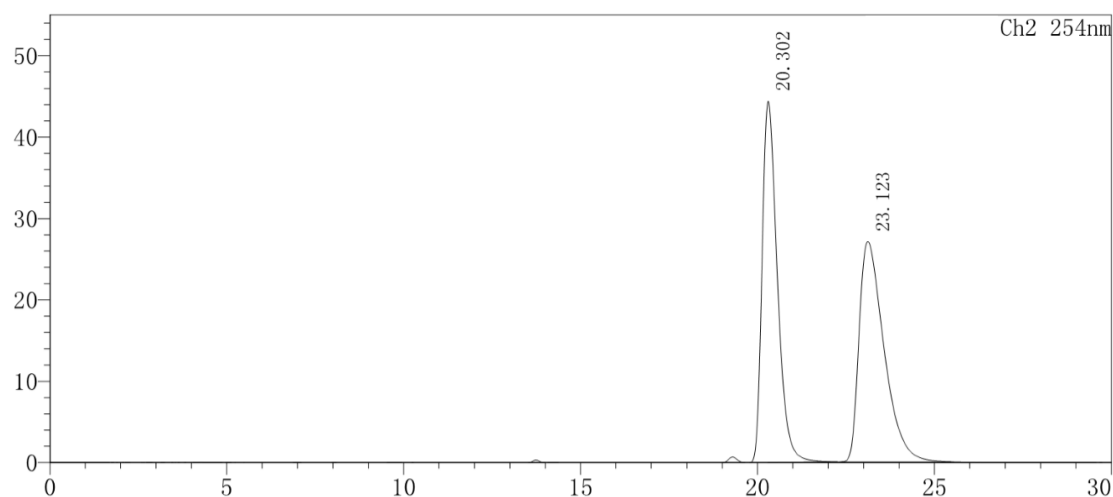

| Peak # | Ret Time [min] | Area [mAU*s] | Height [mAU] | Area [%] |
|--------|----------------|--------------|--------------|----------|
| 1      | 20.302         | 1330480      | 44414        | 50.054   |
| 2      | 23.123         | 1327625      | 27070        | 49.946   |

### 38 enantioenriched, 92% ee

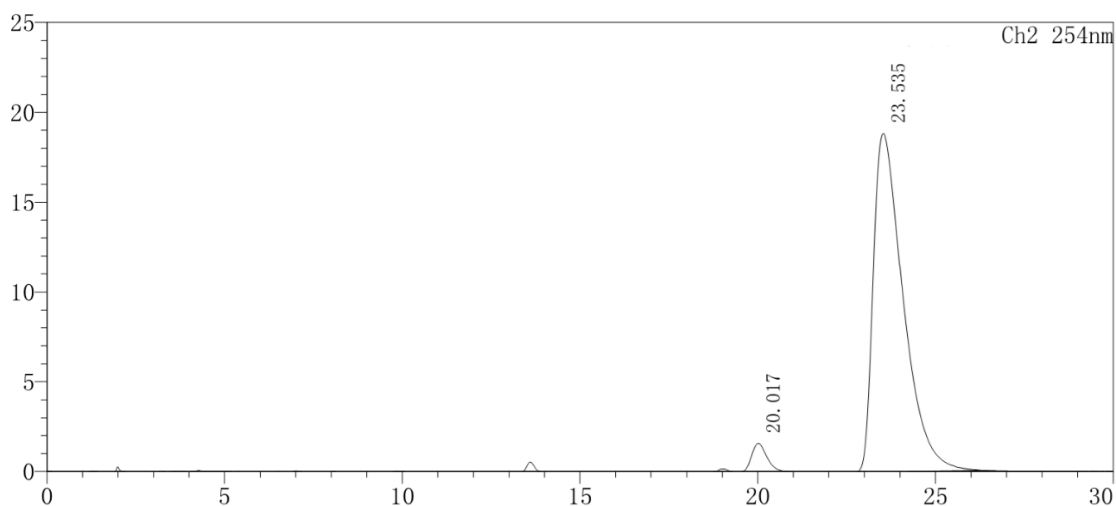

| Peak # | Ret Time [min] | Area [mAU*s] | Height [mAU] | Area [%] |
|--------|----------------|--------------|--------------|----------|
| 1      | 20.017         | 48615        | 1612         | 4.240    |
| 2      | 23.535         | 1097918      | 18860        | 95.760   |

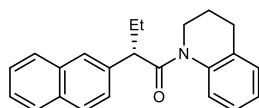

**(S)-1-(3,4-dihydroquinolin-1(2H)-yl)-2-(naphthalen-2-yl)butan-1-one (39)**

According to **General Procedure**, the title compound was isolated by flash column chromatography (silica gel, pentane with 4% EtOAc) as a colorless oil (21.7 mg, 66%, 88% ee).

$^1\text{H}$  NMR (400 MHz,  $\text{CDCl}_3$ )  $\delta$  7.80 – 7.74 (m, 3H), 7.57 (s, 1H), 7.46 – 7.42 (m, 2H), 7.35 (s, 1H), 7.23 – 7.08 (m, 4H), 4.09 (s, 1H), 3.84 – 3.77 (m, 2H), 2.54 – 2.47 (m, 1H), 2.34 – 2.16 (m, 2H), 1.89 – 1.73 (m, 3H), 0.89 (t,  $J = 8.0$  Hz, 3H).

$^{13}\text{C}$  NMR (101 MHz,  $\text{CDCl}_3$ )  $\delta$  173.56, 139.63, 137.94, 133.56, 132.52, 128.44, 128.25, 127.94, 127.66, 126.67, 126.30, 126.13, 126.03, 125.69, 125.43, 50.97, 42.73, 28.82, 26.38, 24.17, 12.58.

**HRMS** (ESI):  $\text{C}_{23}\text{H}_{23}\text{NNaO}^+$  ( $\text{M} + \text{Na}^+$ ): 352.1672, found: 352.1668.

$[\alpha]_{\text{D}}^{25} = 52.6$  ( $c = 1.36$ ,  $\text{CHCl}_3$ ).

**HPLC**: The ee was determined to be 88% on a CHIRALPAK IA column at 254 nm, 25 °C, with hexane:  $i$ PrOH = 95:5 at a flow rate 1.0 mL/min. Retention times:  $t_{\text{R}}$  (major) = 8.8 min,  $t_{\text{R}}$  (minor) = 11.4 min.

**39 racemic**

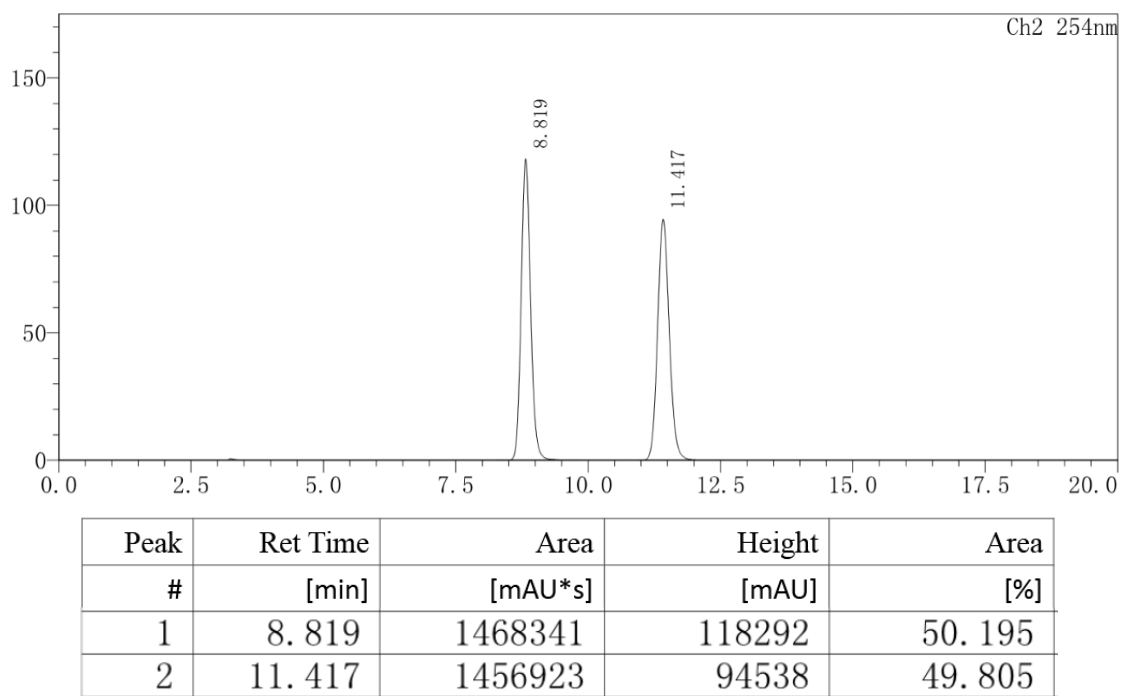

**39 enantioenriched, 88% ee**

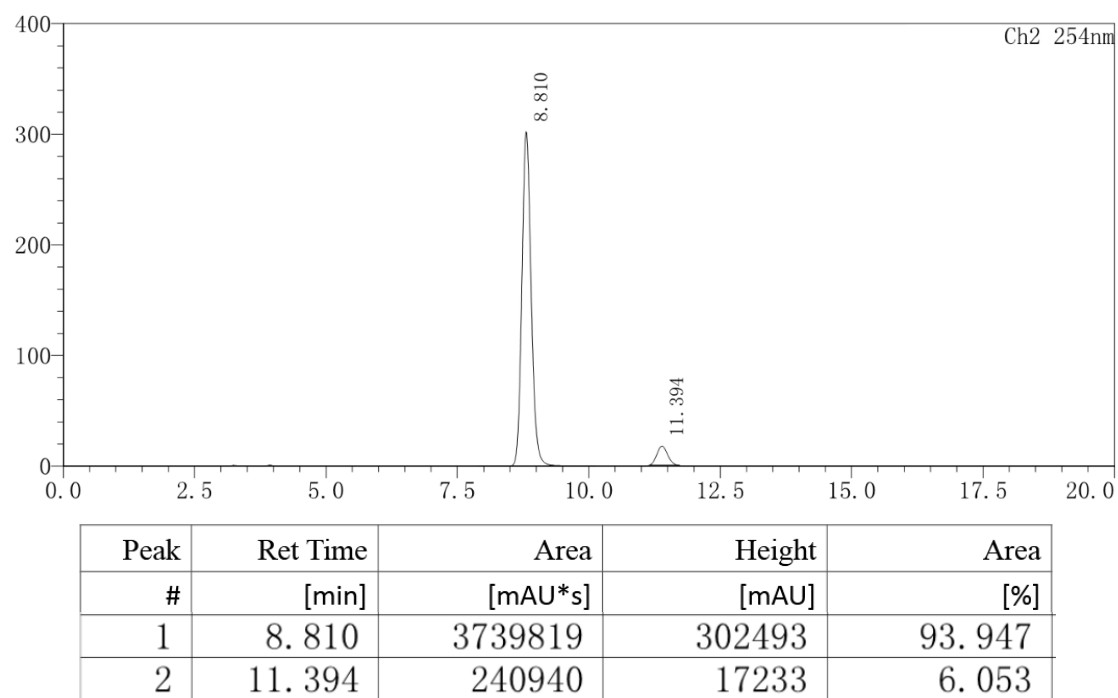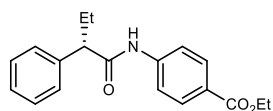

**Ethyl (*S*)-4-(2-phenylbutanamido)benzoate (40)**

According to **General Procedure**, the title compound was isolated by flash column chromatography (silica gel, pentane with 7% EtOAc) as a white solid (19.6 mg, 63%,

95% ee).

**<sup>1</sup>H NMR** (400 MHz, CDCl<sub>3</sub>) δ 7.96 – 7.93 (m, 2H), 7.54 – 7.51 (m, 2H), 7.43 (s, 1H), 7.39 – 7.28 (m, 5H), 4.33 (q, *J* = 8.0 Hz, 2H), 3.41 (t, *J* = 8.0 Hz, 1H), 2.34 – 2.20 (m, 1H), 1.92 – 1.81 (m, 1H), 1.37 (t, *J* = 8.0 Hz, 3H), 0.92 (t, *J* = 8.0 Hz, 3H).

**<sup>13</sup>C NMR** (101 MHz, CDCl<sub>3</sub>) δ 172.15, 166.30, 142.14, 139.25, 130.80, 129.22, 128.16, 127.79, 125.97, 118.87, 61.00, 56.34, 26.53, 14.44, 12.41.

**HRMS** (ESI): C<sub>19</sub>H<sub>22</sub>NO<sub>3</sub><sup>+</sup> (*M*+H<sup>+</sup>): 312.1594, found: 312.1591.

[α]<sub>D</sub><sup>25</sup> = 32.1 (*c* = 0.57, CHCl<sub>3</sub>).

**HPLC**: The ee was determined to be 95% on a CHIRALPAK IA column at 254 nm, 25 °C, with hexane: *i*-PrOH = 90:10 at a flow rate 1.0 mL/min. Retention times: *t*<sub>R</sub> (major) = 13.5 min, *t*<sub>R</sub> (minor) = 15.9 min.

#### 40 racemic

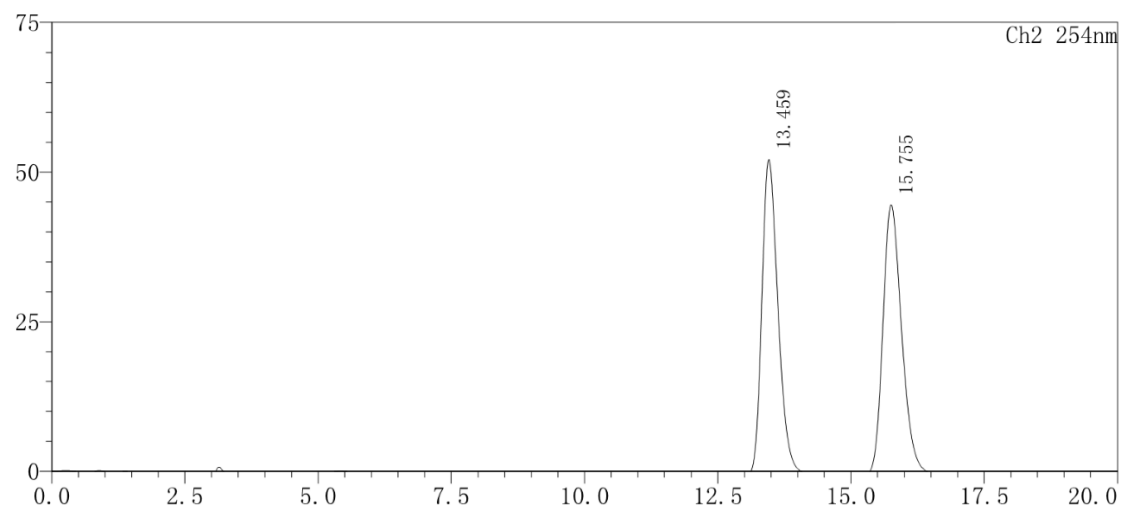

| Peak # | Ret Time [min] | Area [mAU*s] | Height [mAU] | Area [%] |
|--------|----------------|--------------|--------------|----------|
| 1      | 13.459         | 1140476      | 53005        | 50.049   |
| 2      | 15.755         | 1138249      | 45412        | 49.951   |

#### 40 enantioenriched, 95% ee



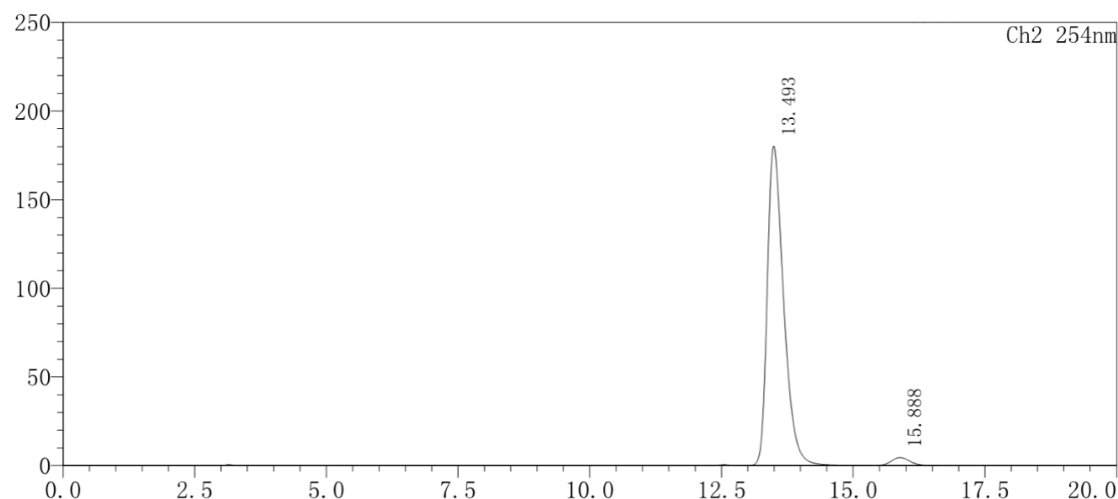

| Peak # | Ret Time [min] | Area [mAU*s] | Height [mAU] | Area [%] |
|--------|----------------|--------------|--------------|----------|
| 1      | 13.493         | 3921284      | 180429       | 97.386   |
| 2      | 15.888         | 105272       | 4471         | 2.614    |

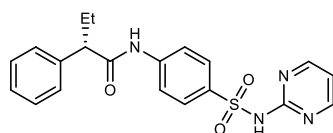

**(S)-2-phenyl-N-(4-(N-(pyrimidin-2-yl)sulfamoyl)phenyl)butanamide (41)**

According to **General Procedure**, the title compound was isolated by flash column chromatography (silica gel, pentane with 33% EtOAc) as a white solid (17.0 mg, 43%, 95% ee).

**<sup>1</sup>H NMR** (400 MHz, Acetone-*d*<sub>6</sub>) δ 10.26 (s, 1H), 9.69 (s, 1H), 8.47 (d, *J* = 8.0 Hz, 2H), 8.035 – 7.99 (m, 2H), 7.83 – 7.80 (m, 2H), 7.40 – 7.38 (m, 2H), 7.31 – 7.27 (m, 2H), 7.254 – 7.19 (m, 1H), 7.01 (t, *J* = 8.0 Hz, 1H), 3.59 (d, *J* = 8.0 Hz, 1H), 2.20 – 2.11 (m, 1H), 1.80 – 1.70 (m, 1H), 0.89 (t, *J* = 8.0 Hz, 3H).

**<sup>13</sup>C NMR** (101 MHz, Acetone-*d*<sub>6</sub>) δ 172.27, 158.29, 157.31, 143.55, 140.30, 134.39, 129.52, 128.43, 127.82, 126.97, 118.30, 115.97, 55.21, 26.89, 11.66.

**HRMS** (ESI): C<sub>20</sub>H<sub>20</sub>N<sub>4</sub>NaO<sub>3</sub>S<sup>+</sup> (M+Na<sup>+</sup>): 419.1148, found: 419.1150.

[α]<sub>D</sub><sup>25</sup> = 33.1 (c = 0.72, CHCl<sub>3</sub>).

**HPLC**: The ee was determined to be 95% on a CHIRALPAK IA column at 254 nm, 25 °C, with hexane: *i*-PrOH = 90:10 at a flow rate 1.0 mL/min. Retention times: *t*<sub>R</sub> (major) = 5.6 min, *t*<sub>R</sub> (minor) = 11.2 min.

**41 racemic**

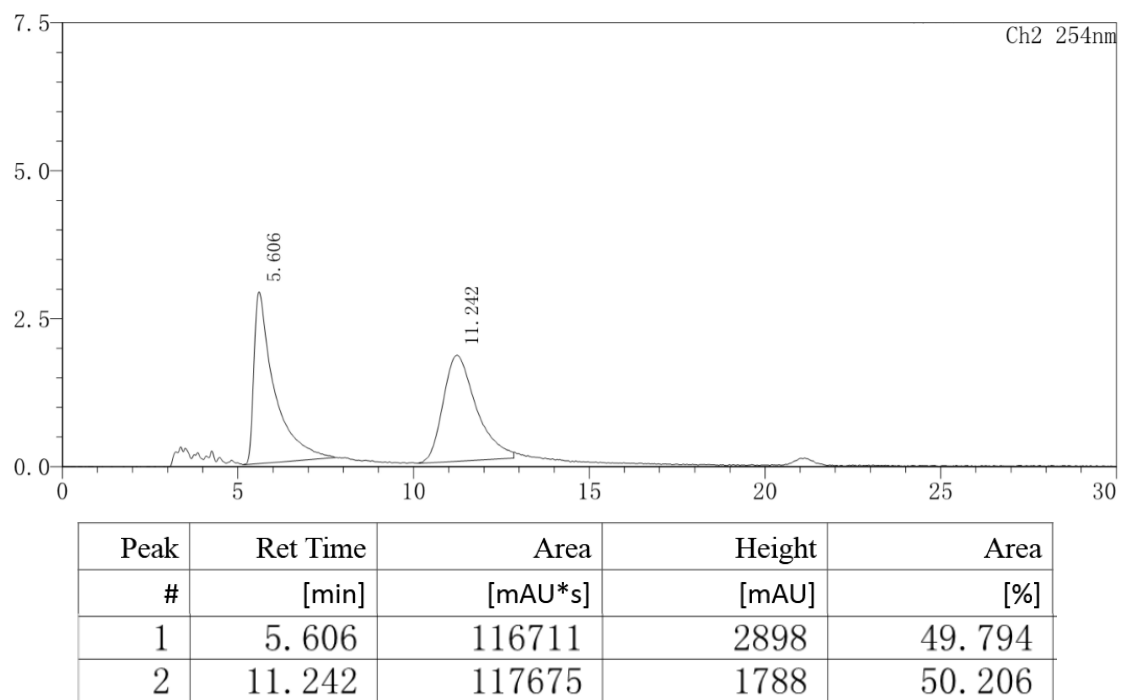

**41 enantioenriched, 95% ee**

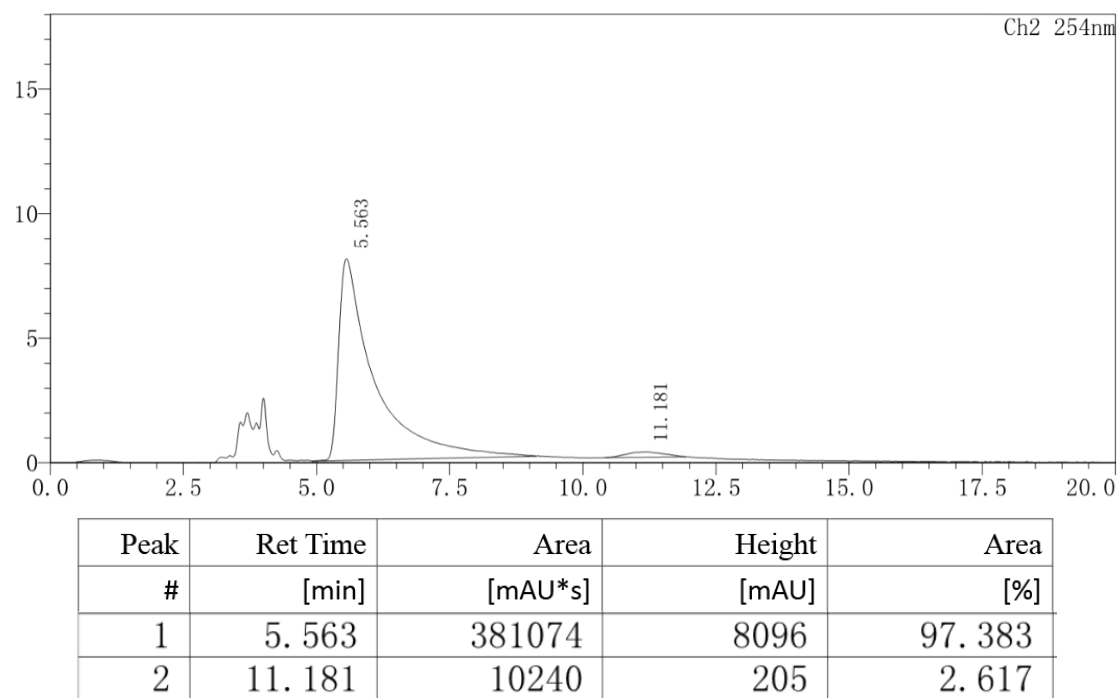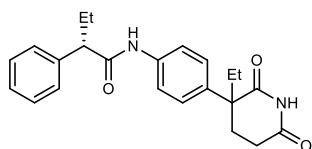

**(2S)-N-(4-(3-ethyl-2,6-dioxopiperidin-3-yl)phenyl)-2-phenylbutanamide (42)**

According to **General Procedure A**, the title compound was isolated by flash column chromatography (silica gel, pentane with 9% EtOAc) as a white solid (16.3 mg, 43%, dr = 1:1, 93% ee, 96% ee).

**<sup>1</sup>H NMR** (400 MHz, CDCl<sub>3</sub>) δ 8.23 – 8.22 (m, 1H), 7.46 – 7.44 (m, 3H), 7.34 – 7.27 (m, 5H), 7.14 (d, *J* = 8.0 Hz, 2H), 3.41 (t, *J* = 8.0 Hz, 1H), 2.58 – 2.52 (m, 1H), 2.39 – 2.28 (m, 2H), 2.26 – 2.21 (m, 1H), 2.20 – 2.13 (m, 1H), 2.01 – 1.93 (m, 1H), 1.89 – 1.82 (m, 2H), 0.91 (t, *J* = 8.0 Hz, 3H), 0.83 (td, *J* = 7.4, 2.5 Hz, 3H).

**<sup>13</sup>C NMR** (101 MHz, CDCl<sub>3</sub>) δ 175.34, 172.56, 172.09, 139.55, 137.50, 134.35, 129.07, 128.09, 127.61, 126.83, 120.23, 56.11, 50.74, 32.91, 29.32, 27.04, 26.56, 12.42, 9.07.

**HRMS** (ESI): C<sub>23</sub>H<sub>27</sub>N<sub>2</sub>O<sub>3</sub><sup>+</sup> (M+H<sup>+</sup>): 379.2016, found: 379.2017.

[α]<sub>D</sub><sup>25</sup> = 43.5 (c = 0.97, CHCl<sub>3</sub>).

**HPLC**: The ee was determined to be 93%, 96% on a CHIRALPAK IA column at 254 nm, 25 °C, with hexane: *i*PrOH = 75:25 at a flow rate 1.0 mL/min. Retention times: t<sub>R</sub> (major) = 31.6, 35.5 min, t<sub>R</sub> (minor) = 24.6 min, 45.2 min (93% ee, 96% ee)

**42 racemic**

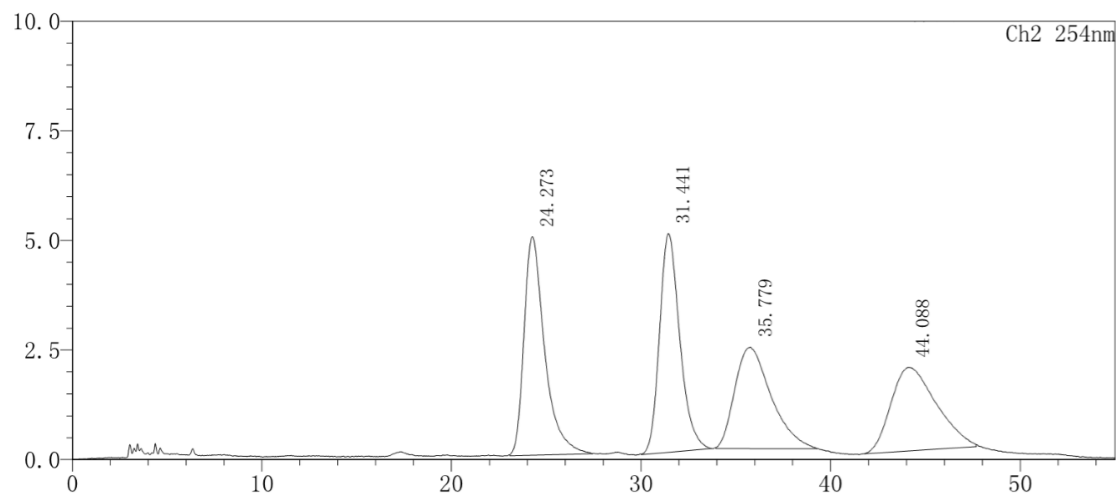

| Peak # | Ret Time [min] | Area [mAU*s] | Height [mAU] | Area [%] |
|--------|----------------|--------------|--------------|----------|
| 1      | 24.273         | 377628       | 4981         | 27.517   |
| 2      | 31.441         | 370417       | 4991         | 26.992   |
| 3      | 35.779         | 308843       | 2316         | 22.505   |
| 4      | 44.088         | 315438       | 1903         | 22.986   |

**42 enantioenriched, 93% ee, 96% ee**

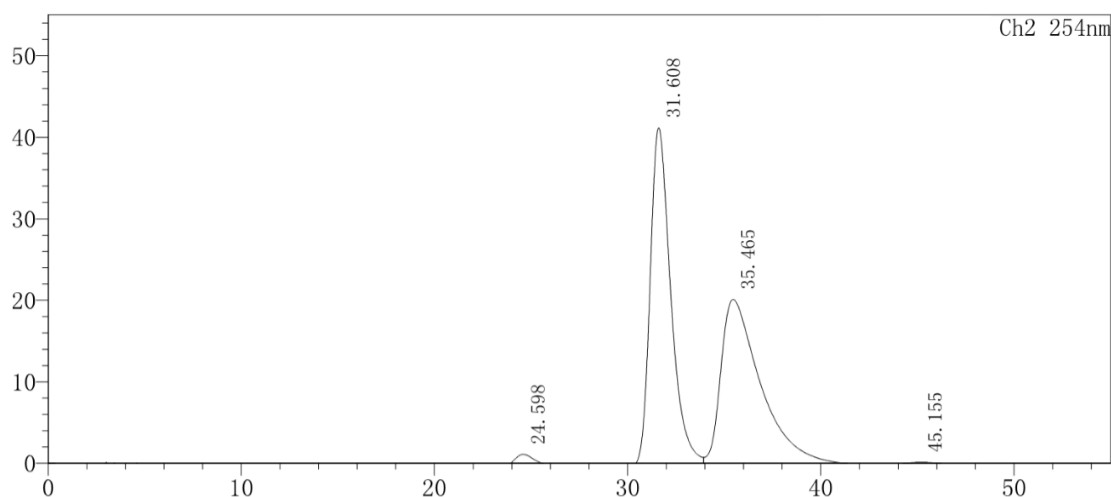

| Peak # | Ret Time [min] | Area [mAU*s] | Height [mAU] | Area [%] |
|--------|----------------|--------------|--------------|----------|
| 1      | 24.598         | 113710       | 1502         | 1.807    |
| 2      | 31.608         | 3115659      | 41566        | 49.519   |
| 3      | 35.465         | 2995333      | 20455        | 47.606   |
| 4      | 45.155         | 67196        | 452          | 1.068    |

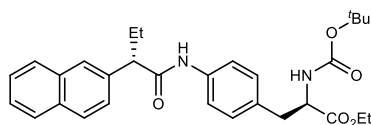

## Ethyl

### (*R*)-2-((*tert*-butoxycarbonyl)amino)-3-(4-((*S*)-2-(naphthalen-2-yl)butanamido)phenyl)propanoate (**43**)

According to **General Procedure**, the title compound was isolated by flash column chromatography (silica gel, pentane with 6% EtOAc) as a white solid (39.8 mg, 79%, 92% ee).

**<sup>1</sup>H NMR** (400 MHz, CDCl<sub>3</sub>) δ 7.84 – 7.79 (m, 4H), 7.49 – 7.47 (m, 3H), 7.38 (d, *J* = 8.0 Hz, 2H), 7.00 (d, *J* = 8.0 Hz, 2H), 4.97 (d, *J* = 8.0 Hz, 1H), 4.50 – 4.46 (m, 1H), 4.13 – 4.08 (m, 2H), 3.56 (t, *J* = 8.0 Hz, 1H), 3.04 – 2.95 (m, 2H), 2.37 – 2.30 (m, 1H), 1.99 – 1.92 (m, 1H), 1.41 (s, 9H), 1.20 (t, *J* = 4.0 Hz, 3H), 0.94 (t, *J* = 4.0 Hz, 3H).

**<sup>13</sup>C NMR** (101 MHz, CDCl<sub>3</sub>) δ 171.83, 155.23, 137.09, 136.98, 133.59, 132.82, 131.92, 129.86, 128.90, 127.85, 127.79, 127.12, 126.43, 126.08, 125.88, 119.91, 79.98, 61.45, 56.16, 54.53, 37.64, 28.39, 26.43, 14.22, 12.46.

**HRMS** (ESI): C<sub>30</sub>H<sub>37</sub>N<sub>2</sub>O<sub>5</sub><sup>+</sup> (*M*+H<sup>+</sup>): 505.2697, found: 505.2693.

$[\alpha]_D^{25} = 49.3$  ( $c = 1.05$ ,  $\text{CHCl}_3$ ).

**HPLC:** The ee was determined to be 92% on a CHIRALPAK IA column at 254 nm, 25 °C, with hexane: *i*PrOH = 85:15 at a flow rate 1.0 mL/min. Retention times:  $t_R$  (major) = 16.2 min,  $t_R$  (minor) = 18.0 min.

#### 43 racemic

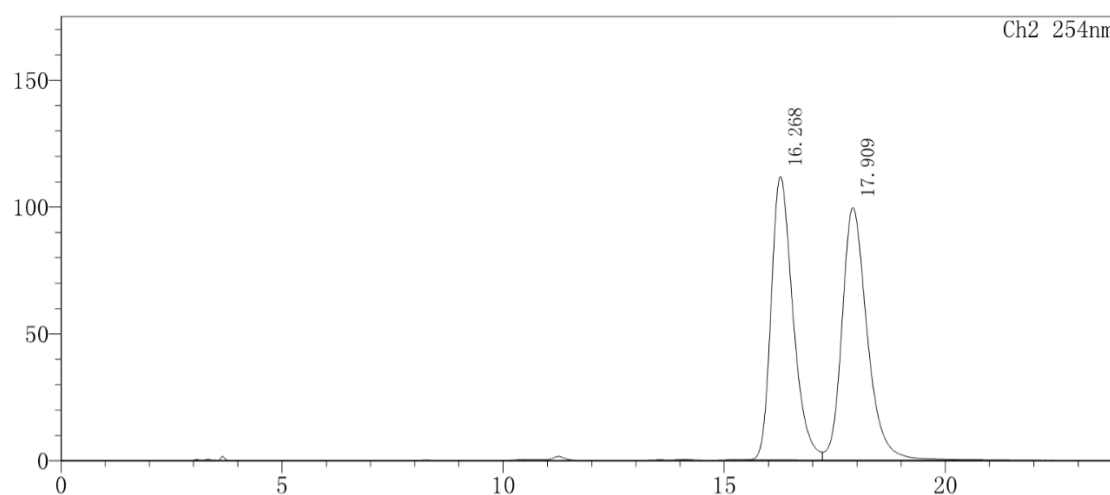

| Peak # | Ret Time [min] | Area [mAU*s] | Height [mAU] | Area [%] |
|--------|----------------|--------------|--------------|----------|
| 1      | 16.268         | 3827327      | 111719       | 49.253   |
| 2      | 17.909         | 3943410      | 99531        | 50.747   |

#### 43 enantioenriched, 92% ee

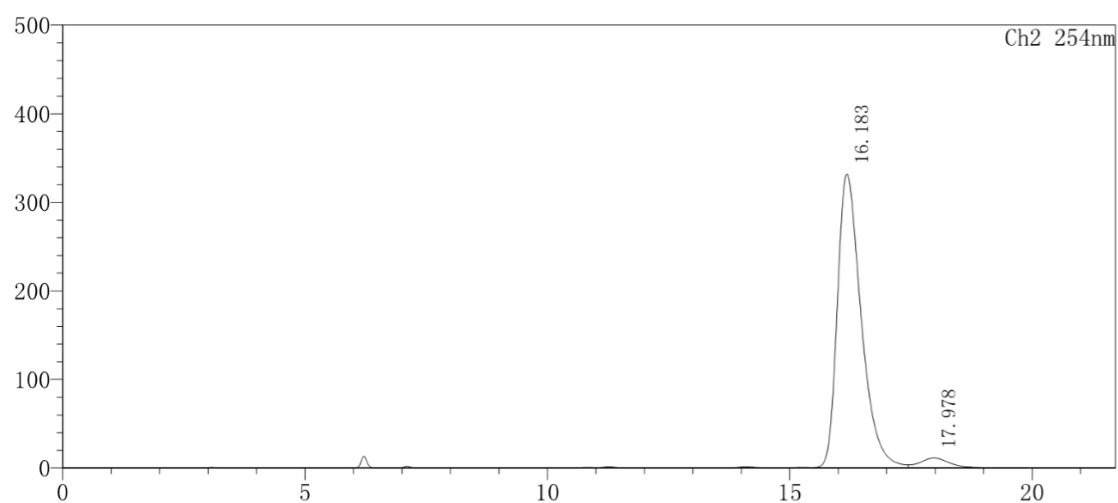

| Peak | Ret Time | Area     | Height | Area   |
|------|----------|----------|--------|--------|
| #    | [min]    | [mAU*s]  | [mAU]  | [%]    |
| 1    | 16.183   | 11335251 | 331716 | 96.022 |
| 2    | 17.978   | 469613   | 11052  | 3.978  |

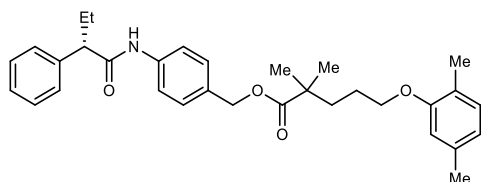

**(S)-4-(2-phenylbutanamido)benzyl**

**5-(2,5-dimethylphenoxy)-2,2-dimethylpentanoate (44)**

According to **General Procedure**, the title compound was isolated by flash column chromatography (silica gel, pentane with 8% EtOAc) as a white solid (25.6 mg, 51%, 93% ee).

**<sup>1</sup>H NMR** (400 MHz, CDCl<sub>3</sub>) δ 7.42 – 7.39 (m, 2H), 7.37 – 7.34 (m, 4H), 7.32 – 7.28 (m, 1H), 7.26 – 7.24 (m, 2H), 7.11 (s, 1H), 6.99 (d, *J* = 8.0 Hz, 1H), 6.65 (d, *J* = 8.0 Hz, 1H), 6.58 (s, 1H), 5.03 (s, 2H), 3.86 (t, *J* = 4.0 Hz, 2H), 3.38 (t, *J* = 8.0 Hz, 1H), 2.30 – 2.22 (m, 4H), 2.14 (s, 3H), 1.90 – 1.83 (m, 1H), 1.72 – 1.68 (m, 4H), 1.21 (s, 6H), 0.93 (t, *J* = 8.0 Hz, 3H).

**<sup>13</sup>C NMR** (101 MHz, CDCl<sub>3</sub>) δ 177.71, 171.81, 157.07, 139.55, 137.86, 136.58, 132.26, 130.39, 129.17, 128.99, 128.18, 127.69, 123.71, 120.78, 119.82, 112.08, 68.02, 65.88, 56.29, 42.25, 37.18, 29.84, 26.53, 25.25, 21.54, 15.88, 12.47.

**HRMS** (ESI): C<sub>32</sub>H<sub>40</sub>NO<sub>4</sub><sup>+</sup> (M+H<sup>+</sup>): 502.2952, found: 502.2943.

[α]<sub>D</sub><sup>25</sup> = 41.5 (c = 0.79, CHCl<sub>3</sub>).

**HPLC**: The ee was determined to be 93% on a CHIRALPAK IA column at 254 nm, 25 °C, with hexane: *i*-PrOH = 92:8 at a flow rate 1.0 mL/min. Retention times: t<sub>R</sub> (major) = 15.4 min, t<sub>R</sub> (minor) = 17.5 min.

**44 racemic**

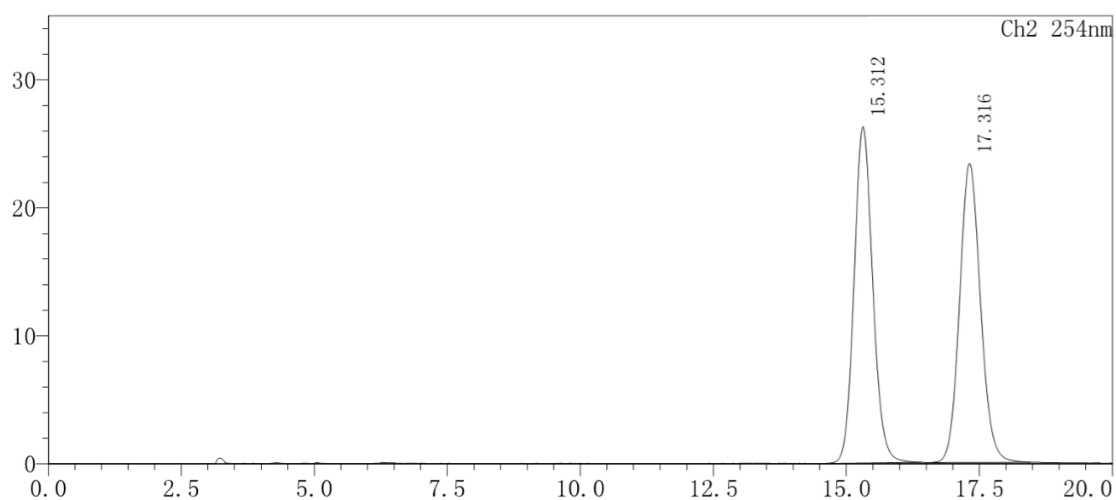

| Peak # | Ret Time [min] | Area [mAU*s] | Height [mAU] | Area [%] |
|--------|----------------|--------------|--------------|----------|
| 1      | 15.312         | 643628       | 26281        | 50.118   |
| 2      | 17.316         | 640601       | 23364        | 49.882   |

**44 enantioenriched, 93% ee**

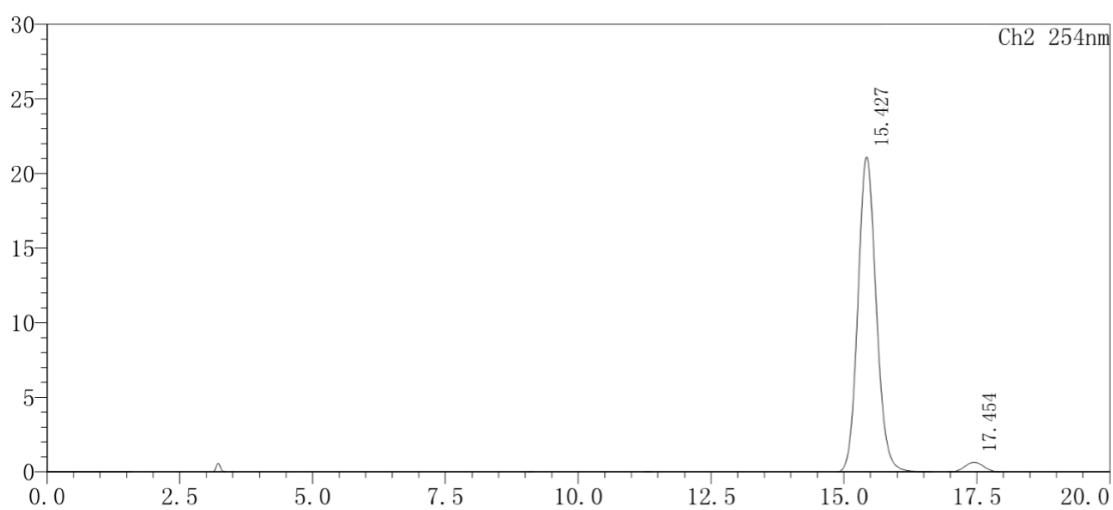

| Peak # | Ret Time [min] | Area [mAU*s] | Height [mAU] | Area [%] |
|--------|----------------|--------------|--------------|----------|
| 1      | 15.427         | 511695       | 21180        | 96.575   |
| 2      | 17.454         | 18149        | 691          | 3.425    |

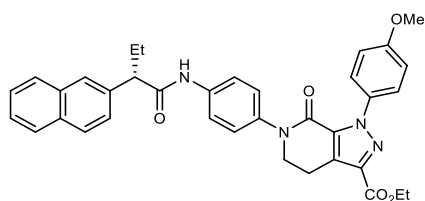

**Ethyl (S)-1-(4-methoxyphenyl)-6-(4-(2-(naphthalen-2-yl)butanamido)phenyl)-**

**7-oxo- 4,5,6,7-tetrahydro-1H-pyrazolo[3,4-c]pyridine-3-carboxylate (45)**

According to **General Procedure**, the title compound was isolated by flash column chromatography (silica gel, pentane with 33% EtOAc) as a white solid (37.9 mg, 63%, 88% ee).

**<sup>1</sup>H NMR** (400 MHz, CDCl<sub>3</sub>) δ 7.73 – 7.72 (m, 3H), 7.58 – 7.55 (m, 1H), 7.51 (s, 1H), 7.48 – 7.43 (m, 2H), 7.39 – 7.30 (m, 3H), 7.12 (d, *J* = 8.0 Hz, 2H), 6.84 – 6.79 (m, 2H), 6.68 (d, *J* = 8.0 Hz, 2H), 4.39 (q, *J* = 8.0 Hz, 2H), 3.85 – 3.76 (m, 1H), 3.74 – 3.68 (m, 4H), 3.20 (t, *J* = 8.0 Hz, 1H), 3.16 – 3.11 (m, 2H), 2.15 – 2.08 (m, 1H), 1.74 – 1.67 (m, 1H), 1.36 (t, *J* = 8.0 Hz, 3H), 0.76 (t, *J* = 8.0 Hz, 3H).

**<sup>13</sup>C NMR** (101 MHz, CDCl<sub>3</sub>) δ 171.67, 162.24, 160.05, 157.46, 139.23, 137.49, 133.46, 133.21, 132.74, 132.69, 128.73, 127.86, 127.69, 127.26, 127.12, 127.10, 126.38, 126.02, 125.98, 125.80, 120.56, 120.53, 113.68, 63.01, 61.40, 55.58, 51.37, 26.62, 21.51, 14.54, 12.34.

**HRMS** (ESI): C<sub>36</sub>H<sub>35</sub>N<sub>4</sub>O<sub>5</sub><sup>+</sup> (*M*+H<sup>+</sup>): 603.2602, found: 603.2607.

[α]<sub>D</sub><sup>25</sup> = 26.9 (*c* = 0.83, CHCl<sub>3</sub>).

**HPLC**: The ee was determined to be 88% on a CHIRALPAK IA column at 254 nm, 25 °C, with hexane: *i*PrOH = 60:40 at a flow rate 1.0 mL/min. Retention times: *t*<sub>R</sub> (major) = 23.5 min, *t*<sub>R</sub> (minor) = 17.6 min.

**45 racemic**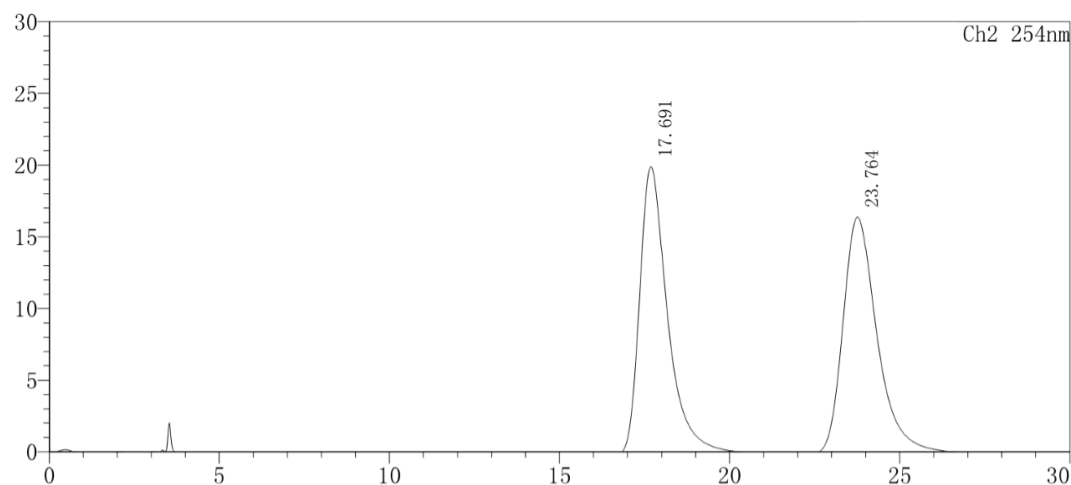

| Peak # | Ret Time [min] | Area [mAU*s] | Height [mAU] | Area [%] |
|--------|----------------|--------------|--------------|----------|
| 1      | 17. 691        | 1145692      | 20096        | 49. 835  |
| 2      | 23. 764        | 1153256      | 16517        | 50. 165  |

**45 enantioenriched, 88% ee**



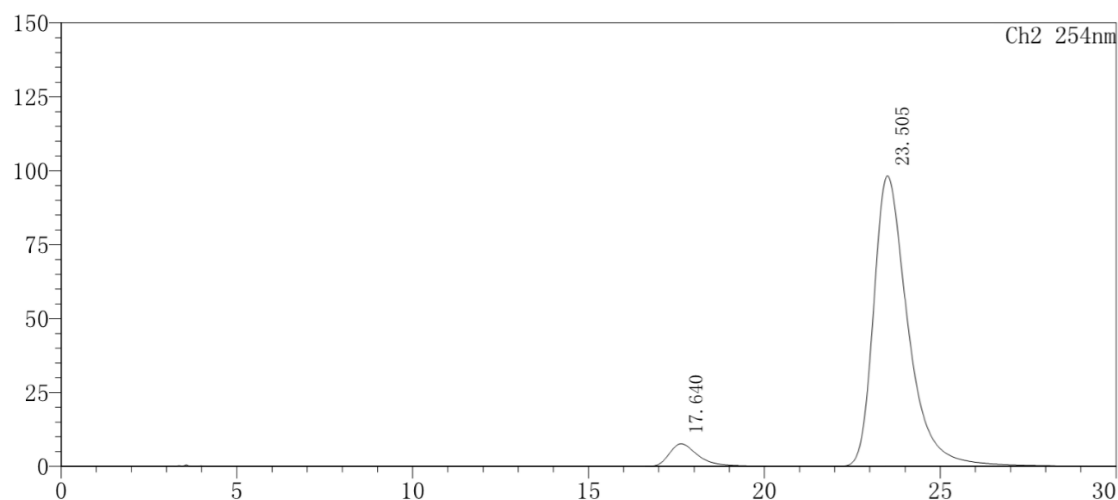

| Peak | Ret Time | Area    | Height | Area   |
|------|----------|---------|--------|--------|
| #    | [min]    | [mAU*s] | [mAU]  | [%]    |
| 1    | 17.640   | 440163  | 7702   | 6.229  |
| 2    | 23.505   | 6626150 | 98284  | 93.771 |

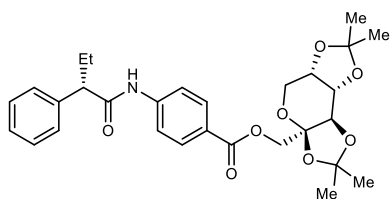

**((3a*R*,5a*S*,8a*S*,8b*R*)-2,2,7,7-tetramethyltetrahydro-3a*H*-bis([1,3]dioxolo)[4,5-*b*:4',5'-*d*]pyran-3a-yl)methyl 4-((*S*)-2-phenylbutanamido)benzoate (46)**

According to **General Procedure**, the title compound was isolated by flash column chromatography (silica gel, pentane with 6% EtOAc) as a white solid (24.2 mg, 46%, 92% ee).

**<sup>1</sup>H NMR** (400 MHz, CDCl<sub>3</sub>) δ 7.98 (d, *J* = 12.0 Hz, 2H), 7.53 (d, *J* = 8.0 Hz, 2H), 7.42 (s, 1H), 7.38 – 7.30 (m, 5H), 4.67 – 4.62 (m, 2H), 4.44 (d, *J* = 1.9 Hz, 1H), 4.31 – 4.24 (m, 2H), 3.94 (d, *J* = 12.0 Hz, 1H), 3.78 (d, *J* = 12.0 Hz, 1H), 3.41 (t, *J* = 8.0 Hz, 1H), 2.32 – 2.23 (m, 1H), 1.90 – 1.83 (m, 1H), 1.53 (s, 3H), 1.45 (s, 3H), 1.33 (d, *J* = 8.0 Hz, 6H), 0.92 (t, *J* = 8.0 Hz, 3H).

**<sup>13</sup>C NMR** (101 MHz, CDCl<sub>3</sub>) δ 172.16, 165.52, 142.40, 139.19, 131.07, 129.25, 128.16, 127.83, 125.29, 118.86, 109.29, 108.96, 101.81, 70.93, 70.61, 70.23, 65.17, 61.47, 56.35, 26.64, 26.50, 26.02, 25.63, 24.14, 12.41.

**HRMS** (ESI): C<sub>29</sub>H<sub>35</sub>NNaO<sub>8</sub><sup>+</sup> (*M*+Na<sup>+</sup>): 548.2255, found: 548.2245.

[α]<sub>D</sub><sup>25</sup> = 31.2 (*c* = 0.97, CHCl<sub>3</sub>).

**HPLC:** The ee was determined to be 92% on a CHIRALPAK IA column at 254 nm, 25 °C, with hexane:*i*PrOH = 85:15 at a flow rate 1.0 mL/min. Retention times:  $t_R$  (major) = 15.8 min,  $t_R$  (minor) = 18.0 min.

#### 46 racemic

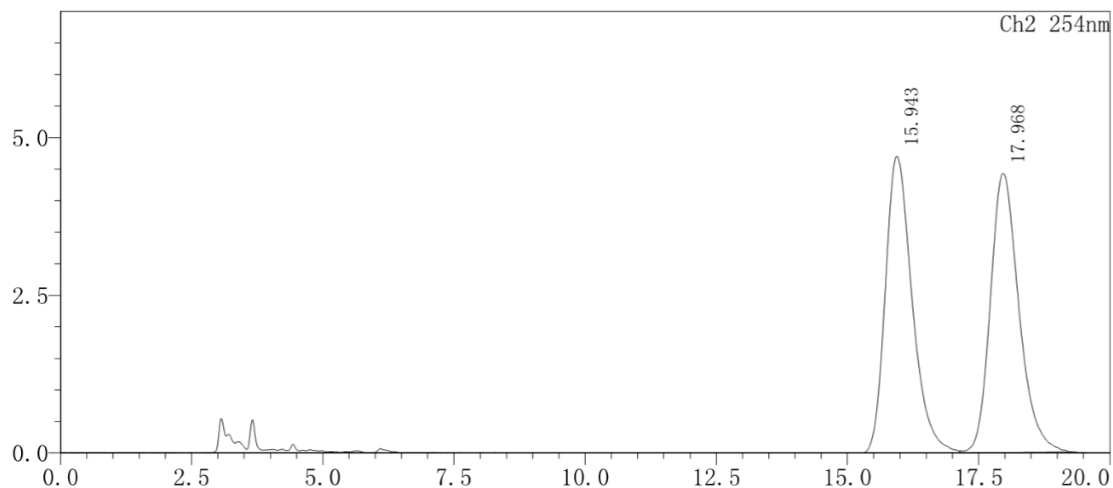

| Peak # | Ret Time [min] | Area [mAU*s] | Height [mAU] | Area [%] |
|--------|----------------|--------------|--------------|----------|
| 1      | 15.943         | 167657       | 4717         | 50.068   |
| 2      | 17.968         | 167201       | 4428         | 49.932   |

#### 46 enantioenriched, 92% ee

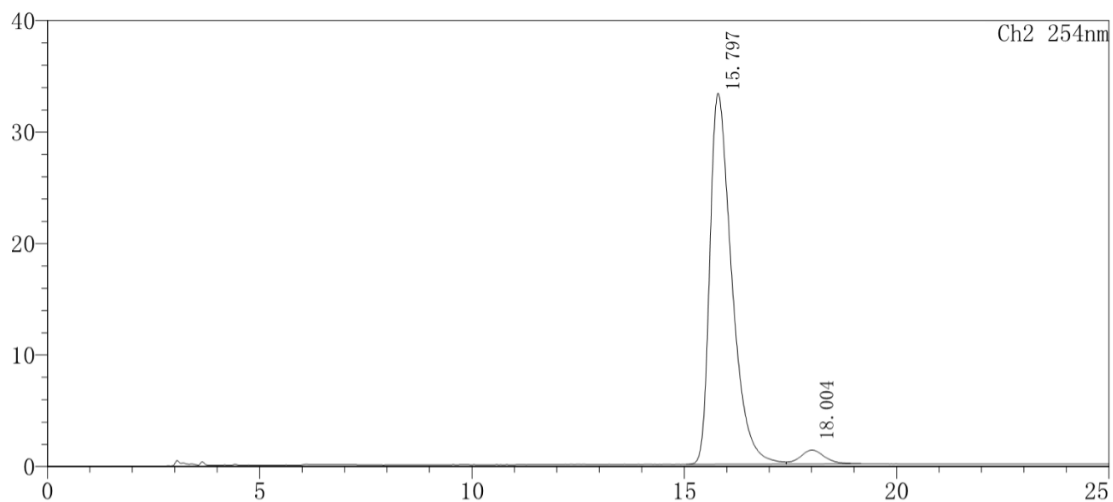

| Peak # | Ret Time [min] | Area [mAU*s] | Height [mAU] | Area [%] |
|--------|----------------|--------------|--------------|----------|
| 1      | 15.797         | 1196514      | 33297        | 95.959   |
| 2      | 18.004         | 50382        | 1250         | 4.041    |

## 6. Gram-Scale Reaction

### Gram-Scale Synthesis of (S)-23:

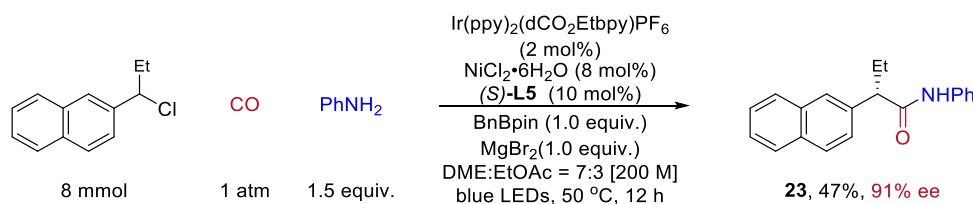

To a flame-dried 100 mL round bottom flask was charged with 2-(1-chloropropyl)naphthalene (8 mmol, 1.0 equiv.)  $\text{Ir(ppy)}_2(\text{dCO}_2\text{Etbpv})\text{PF}_6$  (0.16 mmol, 2 mol%), (S)-L5 (0.8 mmol, 10 mol%),  $\text{NiCl}_2 \cdot 6\text{H}_2\text{O}$  (0.64 mmol, 8 mol%), and  $\text{MgBr}_2$  (8 mmol, 1.0 equiv.). Then the test tube was capped by rubber plug with 3M tape. After it was evacuated and backfilled with a CO balloon three times, DME /EtOAc (40 mL, v/v = 7:3) was added via a syringe, followed by the addition of with aniline (12 mmol), BnBpin (8 mmol, 1.0 equiv.). The reaction mixture was allowed to stir for 12 hours at 50 °C by 90 W blue LEDs, and then quenched with water and extracted with EtOAc (3\*20 mL). The combined organic layers were washed by brine, dried over  $\text{MgSO}_4$ , and concentrated. The residue was purified by flash column chromatography (silica gel, pentane with 6% EtOAc) to afford the product **23** (1.09 g, 47% yield, 91% ee).

**HPLC:** The ee was determined to be 91% on a CHIRALPAK IA column at 254 nm, 25 °C, with hexane: *i*PrOH = 90:10 at a flow rate 1.0 mL/min. Retention times:  $t_R$  (major) = 12.0 min,  $t_R$  (minor) = 15.5 min.

### 23 racemic

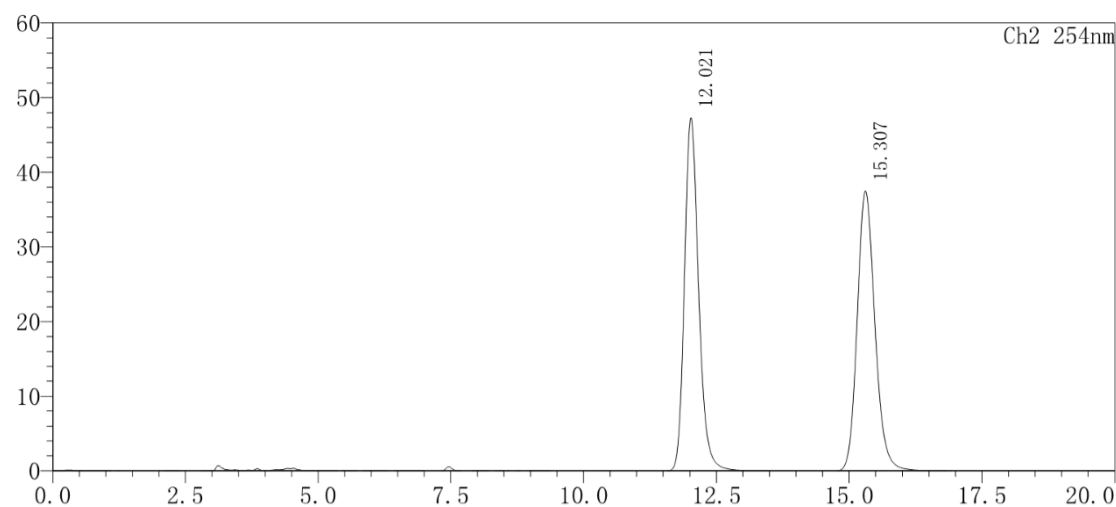

| Peak | Ret Time | Area    | Height | Area   |
|------|----------|---------|--------|--------|
| #    | [min]    | [mAU*s] | [mAU]  | [%]    |
| 1    | 12.021   | 877547  | 47387  | 49.980 |
| 2    | 15.307   | 878237  | 37580  | 50.020 |

**23 enantioenriched, 91% ee**

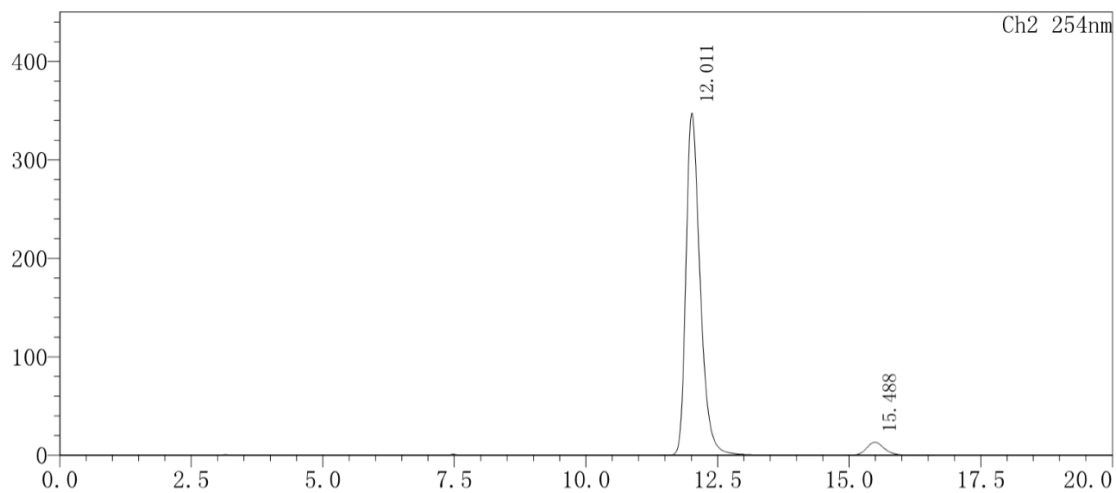

| Peak | Ret Time | Area    | Height | Area   |
|------|----------|---------|--------|--------|
| #    | [min]    | [mAU*s] | [mAU]  | [%]    |
| 1    | 12.011   | 6481819 | 347811 | 95.338 |
| 2    | 15.488   | 316991  | 13348  | 4.662  |

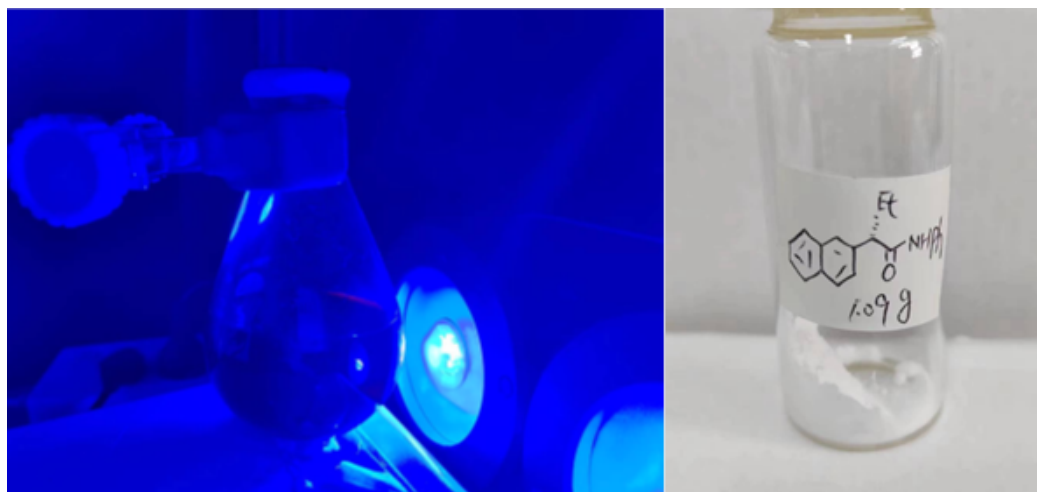

**Supplementary Figure S7** Gram-Scale Reaction experimental setup

## 7. Synthetic Transformations

### 7.1 Synthesis of chiral amides and amines

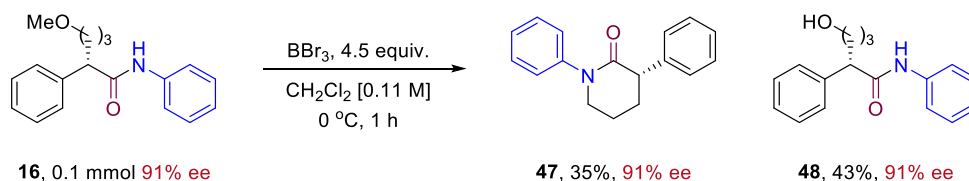

$\text{BBr}_3$  (1 M in  $\text{CH}_2\text{Cl}_2$ , 0.45 mL, 0.45 mmol) was slowly added to a suspension of **16** (0.1 mmol) in anhydrous  $\text{CH}_2\text{Cl}_2$  (1 mL) at  $0\text{ }^\circ\text{C}$  and the solution was stirred for 1 hour at  $0\text{ }^\circ\text{C}$ . Next, water was added for quenching and the formed precipitate was filtered, washed with  $\text{CH}_2\text{Cl}_2$  ( $2 \times 5\text{ mL}$ ) and water ( $2 \times 5\text{ mL}$ ) and dried in vacuo, the residue was purified by flash column chromatography (silica gel, pentane with 7% EtOAc) to obtain **47** (8.8 mg, 35%, 91% ee) and **48**<sup>12</sup> (10.4 mg, 43%, 91% ee).

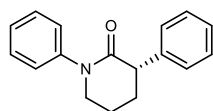

#### (S)-1,3-diphenylpiperidin-2-one (**47**)

$^1\text{H NMR}$  (400 MHz,  $\text{CDCl}_3$ )  $\delta$  7.33 – 7.31 (m, 2H), 7.28 – 7.26 (m, 3H), 7.21 – 7.16 (m, 3H), 7.01 – 6.95 (m, 2H), 3.41 (t,  $J = 8.0\text{ Hz}$ , 1H), 3.35 – 3.25 (m, 2H), 2.34 – 2.20 (m, 1H), 1.96 – 1.78 (m, 2H), 1.75 – 1.64 (m, 1H).

$^{13}\text{C NMR}$  (101 MHz,  $\text{CDCl}_3$ )  $\delta$  171.18, 139.11, 137.81, 129.39, 129.09, 128.11, 127.97, 124.54, 119.88, 53.61, 33.41, 31.91, 30.96.

**HRMS** (ESI):  $\text{C}_{17}\text{H}_{18}\text{NO}^+$  ( $\text{M}+\text{H}^+$ ): 252.1383, found: 252.1380.

$[\alpha]_{\text{D}}^{25} = 37.9$  ( $c = 1.03$ ,  $\text{CHCl}_3$ ).

**HPLC**: The ee was determined to be 91% on a CHIRALPAK ADH column at 254 nm,  $25\text{ }^\circ\text{C}$ , with hexane:  $i\text{PrOH} = 92:8$  at a flow rate 1.0 mL/min. Retention times:  $t_{\text{R}}$  (major) = 18.3 min,  $t_{\text{R}}$  (minor) = 22.3 min.

**47 racemic**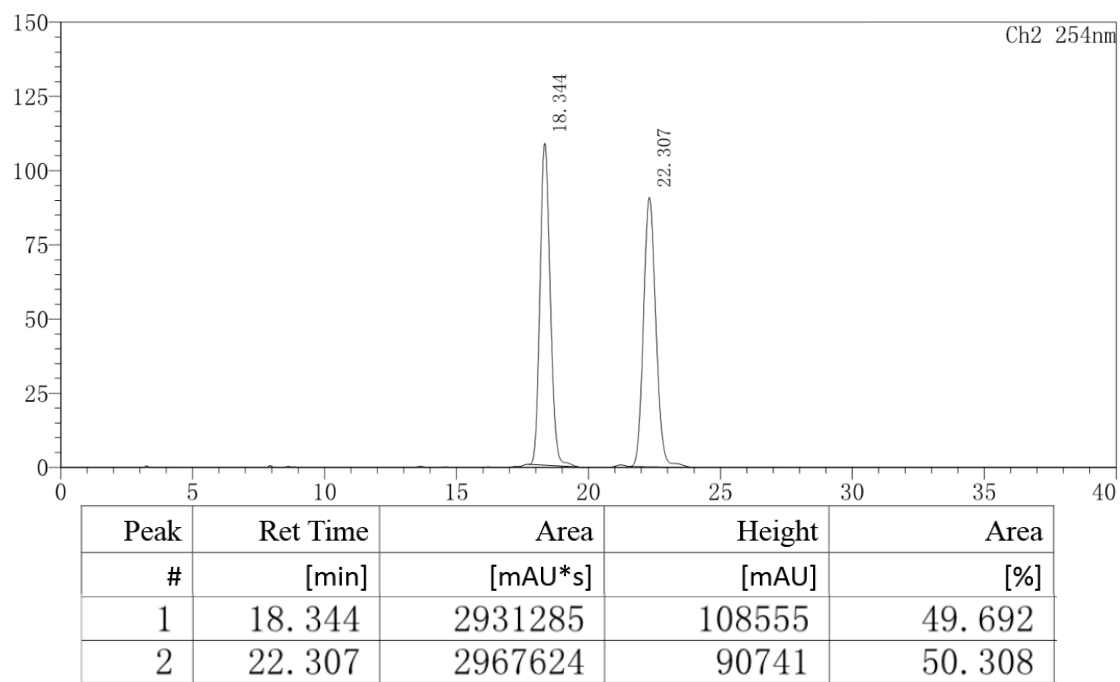**47 enantioenriched, 91% ee**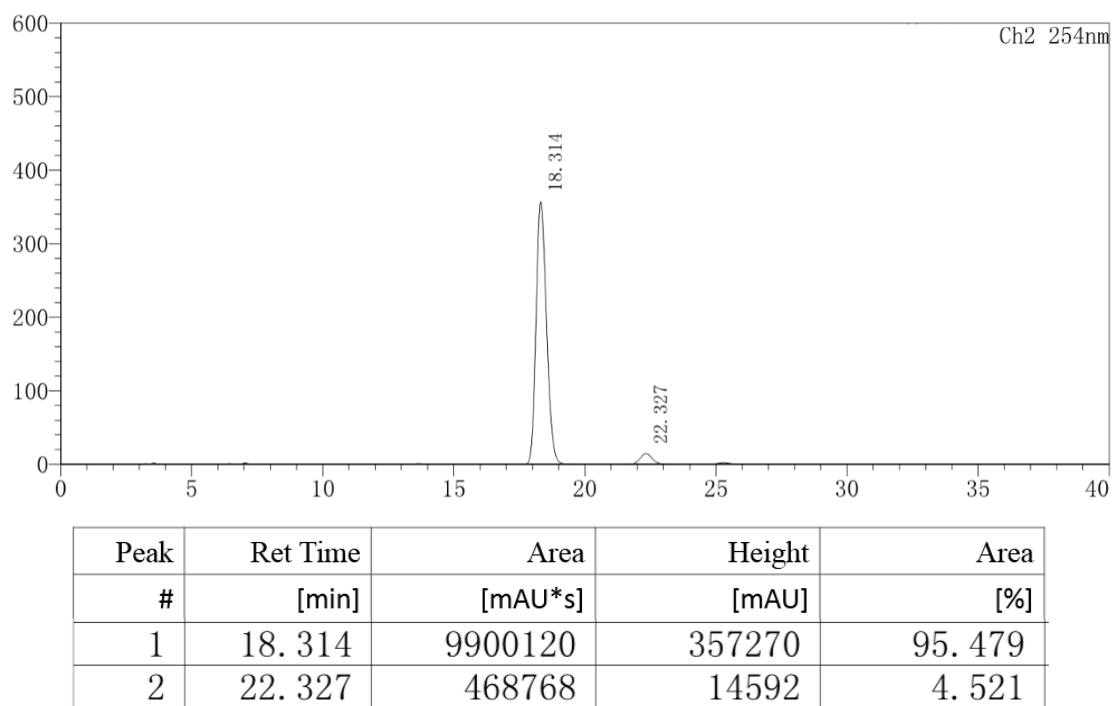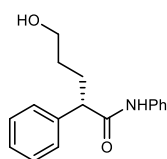**(S)-5-hydroxy-N,2-diphenylpentanamide (48)**

**$^1\text{H}$  NMR** (400 MHz,  $\text{CDCl}_3$ )  $\delta$  7.44 – 7.43 (m, 2H), 7.36 – 7.35 (m, 4H), 7.28 – 7.24 (m, 3H), 7.06 (t,  $J$  = 8.0 Hz, 1H), 3.67 – 3.66 (m, 2H), 3.56 (t,  $J$  = 8.0 Hz, 1H), 2.38 – 2.29 (m, 1H), 1.95 – 1.86 (m, 2H), 1.59 (m, 1H).

**$^{13}\text{C}$  NMR** (101 MHz,  $\text{CDCl}_3$ )  $\delta$  171.92, 139.67, 137.93, 129.21, 129.05, 128.12, 127.73, 124.45, 119.93, 62.60, 53.98, 30.79, 29.79.

**HRMS** (ESI):  $\text{C}_{17}\text{H}_{20}\text{NO}_2^+$  ( $\text{M}+\text{H}^+$ ): 270.1489, found: 270.1483.

$[\alpha]_{\text{D}}^{25} = 29.2$  ( $c = 0.65$ ,  $\text{CHCl}_3$ ).

**HPLC**: The ee was determined to be 91% on a CHIRALPAK ADH column at 254 nm, 25 °C, with hexane:  $i\text{PrOH}$  = 90:10 at a flow rate 1.0 mL/min. Retention times:  $t_{\text{R}}$  (major) = 13.3 min,  $t_{\text{R}}$  (minor) = 16.0 min.

#### 48 racemic

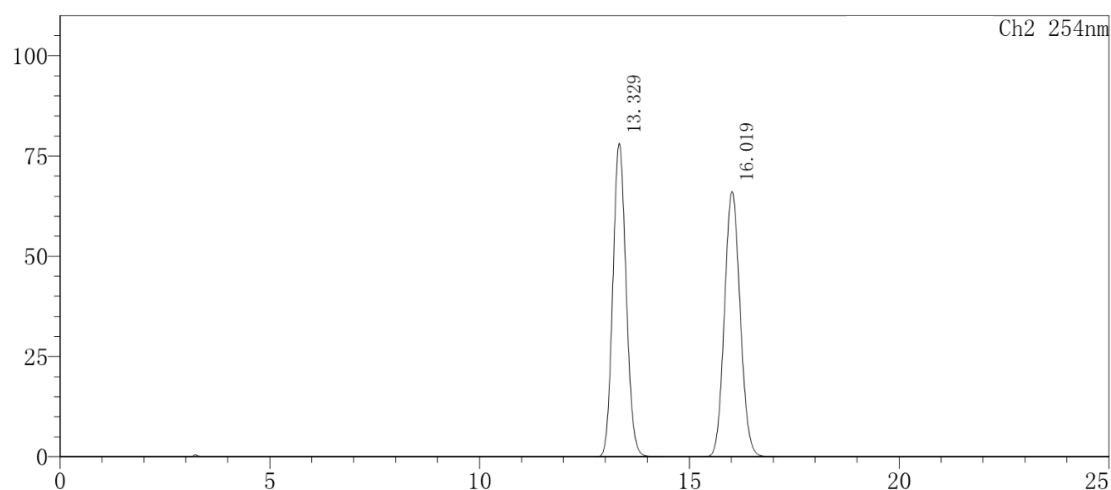

| Peak # | Ret Time [min] | Area [mAU*s] | Height [mAU] | Area [%] |
|--------|----------------|--------------|--------------|----------|
| 1      | 13.329         | 1726422      | 78193        | 50.005   |
| 2      | 16.019         | 1726046      | 66186        | 49.995   |

#### 48 nantioenriched, 91% ee

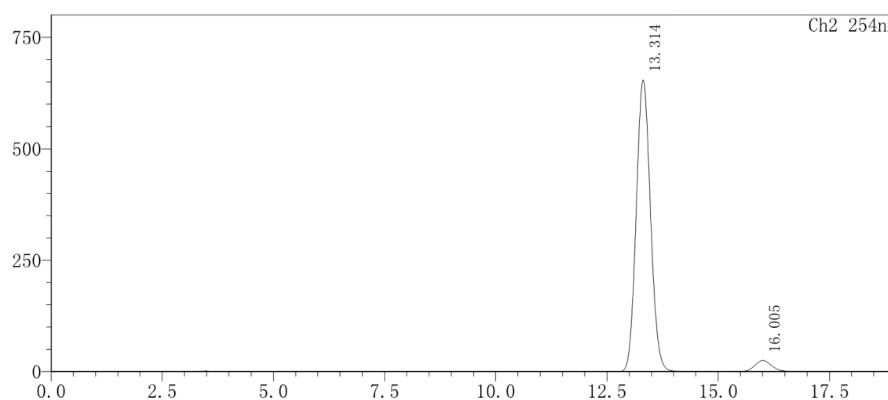

| Peak | Ret Time | Area     | Height | Area   |
|------|----------|----------|--------|--------|
| #    | [min]    | [mAU*s]  | [mAU]  | [%]    |
| 1    | 13.314   | 14641669 | 654701 | 95.650 |
| 2    | 16.005   | 665883   | 24883  | 4.350  |

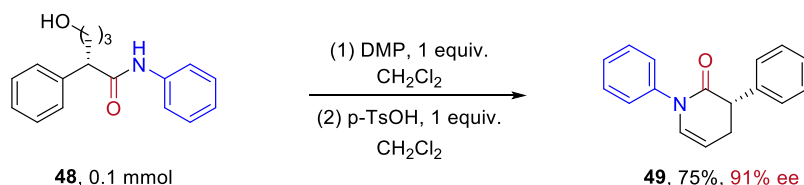

To a solution of **48** (0.1 mmol) in CH<sub>2</sub>Cl<sub>2</sub> (2.00 mL) was added Dess-Martin periodinane (42.4 mg, 0.1 mmol), and the reaction mixture was stirred for 2 hours. After the reaction was quenched with sat. aq. NaHCO<sub>3</sub> and sat. aq. Na<sub>2</sub>S<sub>2</sub>O<sub>3</sub>, the whole mixture was extracted with EtOAc. The organic layer was washed with brine, dried over Na<sub>2</sub>SO<sub>4</sub>, and filtered. The solvent was removed in vacuo to give a pale yellow oil, which was dissolved in CH<sub>2</sub>Cl<sub>2</sub> (2.00 mL). The mixture was treated with p-toluene sulfonic acid monohydrate (19 mg, 0.1 mmol), and the reaction mixture was stirred for 2 hrs. After the reaction was quenched by the addition of H<sub>2</sub>O (1 mL), and the mixture was extracted with EtOAc, washed with brine. The organic layer was dried over Na<sub>2</sub>SO<sub>4</sub>, filtered, and concentrated in vacuo and the crude product was purified by flash column chromatography (silica gel, pentane with 9% EtOAc) to afford the desired product **49**<sup>13</sup> (18.7 mg, 75% yield, **91% ee**).

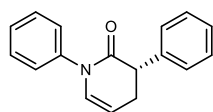

**(S)-1,3-diphenyl-3,4-dihydropyridin-2(1H)-one (49)**

<sup>1</sup>H NMR (400 MHz, CDCl<sub>3</sub>) δ 7.33 – 7.25 (m, 6H), 7.22 – 7.18 (m, 4H), 6.27 (d, *J* = 8.0 Hz, 1H), 5.29 – 5.25 (m, 1H), 3.86 (t, *J* = 8.0 Hz, 1H), 2.77 – 2.61 (m, 2H).

<sup>13</sup>C NMR (101 MHz, CDCl<sub>3</sub>) δ 169.80, 140.86, 139.10, 131.04, 129.10, 128.67, 128.17, 127.30, 127.06, 126.09, 106.17, 47.65, 28.38.

HRMS (ESI): C<sub>17</sub>H<sub>16</sub>NO<sup>+</sup> (*M*+H<sup>+</sup>): 250.1226, found: 250.1223.

[α]<sub>D</sub><sup>25</sup> = 43.1 (*c* = 0.76, CHCl<sub>3</sub>).

HPLC: The ee was determined to be 91% on a CHIRALPAK ADH column at 254 nm,



25 °C, with hexane: *i*PrOH = 60:40 at a flow rate 1.0 mL/min. Retention times:  $t_R$  (major) = 12.5 min,  $t_R$  (minor) = 5.3 min.

**49 racemic**

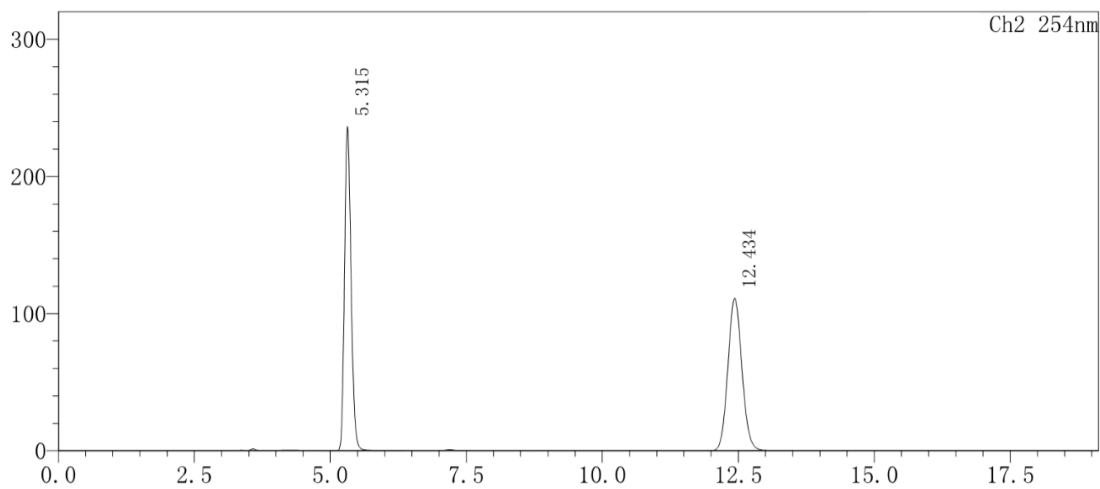

| Peak # | Ret Time [min] | Area [mAU*s] | Height [mAU] | Area [%] |
|--------|----------------|--------------|--------------|----------|
| 1      | 5.315          | 1978593      | 236636       | 49.829   |
| 2      | 12.434         | 1992210      | 111229       | 50.171   |

**49 enantioenriched, 91% ee**

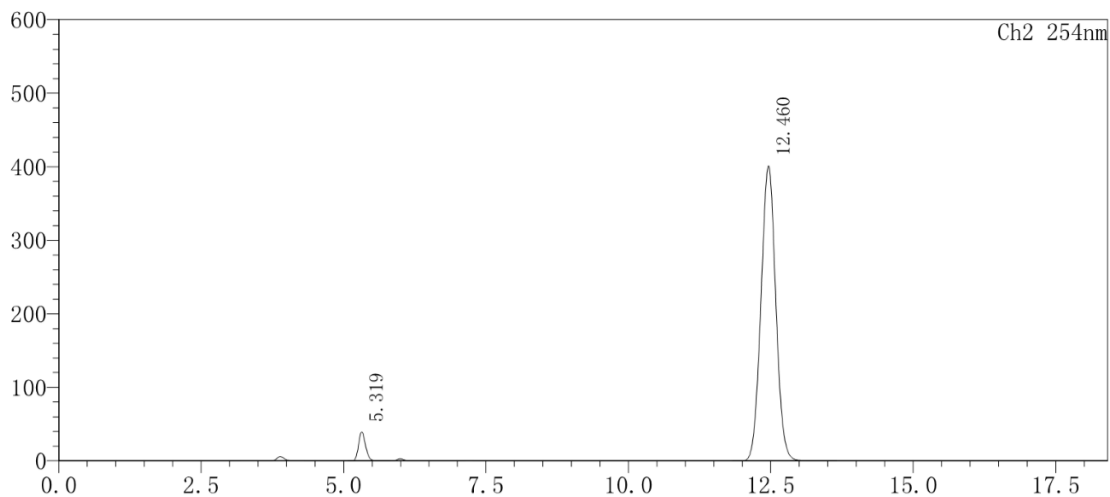

| Peak # | Ret Time [min] | Area [mAU*s] | Height [mAU] | Area [%] |
|--------|----------------|--------------|--------------|----------|
| 1      | 5.319          | 338209       | 39254        | 4.447    |
| 2      | 12.460         | 7267080      | 401505       | 95.553   |

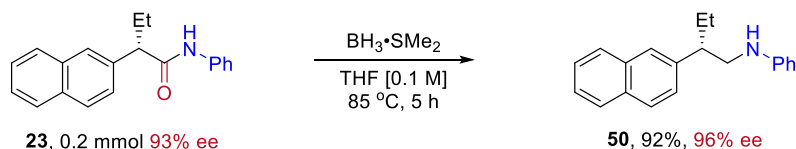

Borane-SMe<sub>2</sub> (120 μL, 2.0 M in THF, 0.24 mmol, 1.2 equiv) was added dropwise to a solution of (S)-2-(naphthalen-2-yl)-N-phenylbutanamide (**23**, 0.20 mmol, 1.0 equiv) in THF (2.0 mL) at 0 °C in a 10-mL Schlenk tube. Next, the reaction mixture was allowed to warm to room temperature, and then it was heated to 85 °C. After being stirred at 85 °C in the sealed Schlenk tube for 8 hours, the reaction was quenched with aqueous NaOH (1.0 M, 0.5 mL), and the reaction mixture was extracted with Et<sub>2</sub>O (3 × 10.0 mL). The combined organic layers were dried (Na<sub>2</sub>SO<sub>4</sub>), filtered, and concentrated under reduced pressure. The residue was purified by flash column chromatography (silica gel, pentane with 2.5% EtOAc) to provide the title compound **50**<sup>14</sup> as a colorless oil (26.4 mg, 92% yield, **96% ee**).

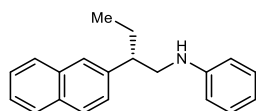

**(S)-N-(2-(naphthalen-2-yl)butyl)aniline (50)**

<sup>1</sup>H NMR (400 MHz, CDCl<sub>3</sub>) δ 7.84 – 7.81 (m, 3H), 7.65 (s, 1H), 7.51 – 7.44 (m, 2H), 7.35 (dd, *J* = 8.5, 1.5 Hz, 1H), 7.18 – 7.14 (m, 2H), 6.71 (t, *J* = 8.0 Hz, 1H), 6.58 (d, *J* = 8.0 Hz, 2H), 3.57 – 3.52 (m, 1H), 3.35 – 3.30 (m, 1H), 3.02 – 2.95 (m, 1H), 2.63 (s, 1H), 1.95 – 1.84 (m, 1H), 1.82 – 1.71 (m, 1H), 0.88 (t, *J* = 8.0 Hz, 3H).

<sup>13</sup>C NMR (101 MHz, CDCl<sub>3</sub>) δ 148.02, 140.43, 133.67, 132.70, 129.36, 128.61, 127.79, 127.74, 127.15, 126.22, 125.76, 125.65, 117.71, 113.35, 49.60, 47.41, 27.28, 12.22.

HRMS (ESI): C<sub>20</sub>H<sub>22</sub>N<sup>+</sup> (M+H<sup>+</sup>): 276.1747, found: 276.1748.

[α]<sub>D</sub><sup>25</sup> = 29.3 (c = 0.56, CHCl<sub>3</sub>).

HPLC: The ee was determined to be 96% on a CHIRALPAK IA column at 254 nm, 25 °C, with hexane: *i*PrOH = 98:2 at a flow rate 1.0 mL/min. Retention times: *t*<sub>R</sub> (major) = 6.2 min, *t*<sub>R</sub> (minor) = 6.8 min.

## 50 racemic

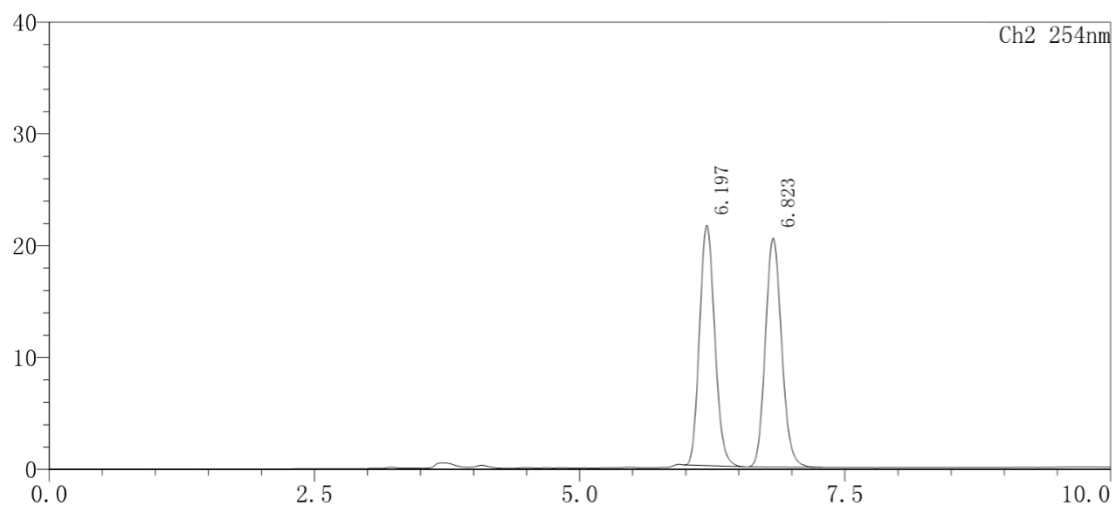

| Peak # | Ret Time [min] | Area [mAU*s] | Height [mAU] | Area [%] |
|--------|----------------|--------------|--------------|----------|
| 1      | 6.197          | 215555       | 21520        | 49.585   |
| 2      | 6.823          | 219162       | 20501        | 50.415   |

## 50 enantioenriched, 96% ee

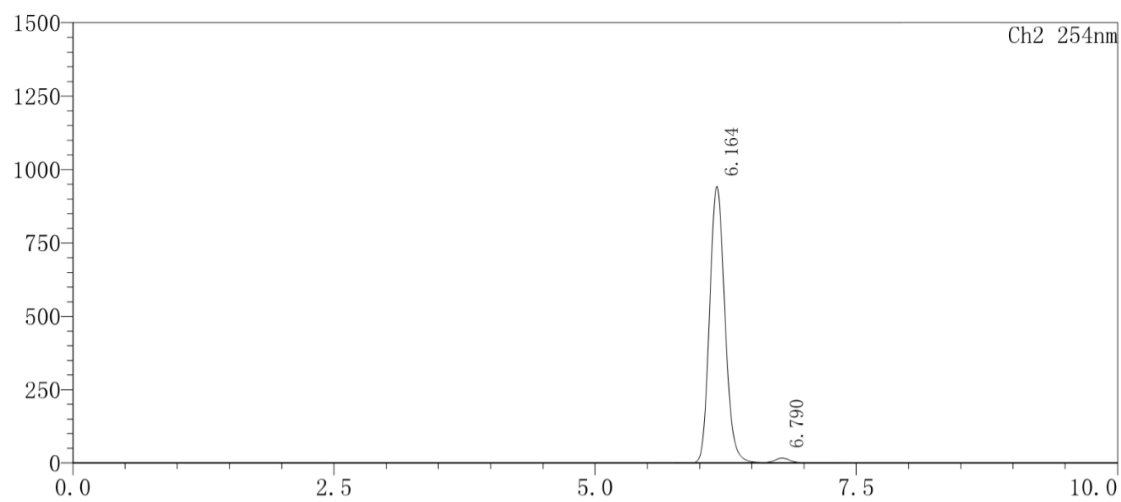

| Peak # | Ret Time [min] | Area [mAU*s] | Height [mAU] | Area [%] |
|--------|----------------|--------------|--------------|----------|
| 1      | 6.164          | 9633577      | 943604       | 98.100   |
| 2      | 6.790          | 186629       | 16866        | 1.900    |

## 7.2 Synthesis of non-steroidal anti-inflammatory drugs

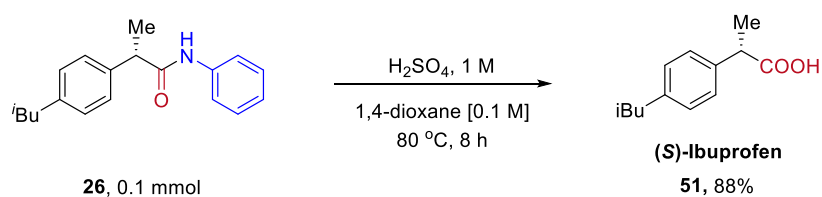

A solution of compounds **26**, 0.1 mmol in 1 M H<sub>2</sub>SO<sub>4</sub> (aq, 1.0 mL) and 1,4-dioxane (1.0 mL) was stirred at 80 °C for 8 hours. After the reaction completed, the reaction was cooled down to room temperature. The mixture was extracted with CH<sub>2</sub>Cl<sub>2</sub> (20 mL × 3). The organic layers were dried over sodium sulfate and concentrated. The residue was then purified by flash column chromatography (silica gel, pentane with 12% EtOAc) to give the corresponding (*S*)-ibuprofen **51**<sup>6</sup> (18.1 mg, 88% yield).

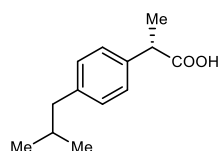

### (*S*)-2-(4-isobutylphenyl)propanoic acid (**51**)

<sup>1</sup>H NMR (400 MHz, CDCl<sub>3</sub>) δ 7.22 (d, *J* = 8.0 Hz, 2H), 7.10 (d, *J* = 8.0 Hz, 2H), 3.71 (q, *J* = 8.0 Hz, 1H), 2.45 (d, *J* = 8.0 Hz, 2H), 1.90 – 1.80 (m, 1H), 1.50 (d, *J* = 8.0 Hz, 3H), 0.90 (d, *J* = 8.0 Hz, 6H).

<sup>13</sup>C NMR (101 MHz, CDCl<sub>3</sub>) δ 180.79, 141.00, 137.14, 129.54, 127.42, 45.19, 45.08, 30.31, 22.54, 18.25.

[α]<sub>D</sub><sup>25</sup> = 42.0 (c = 0.78, CHCl<sub>3</sub>).

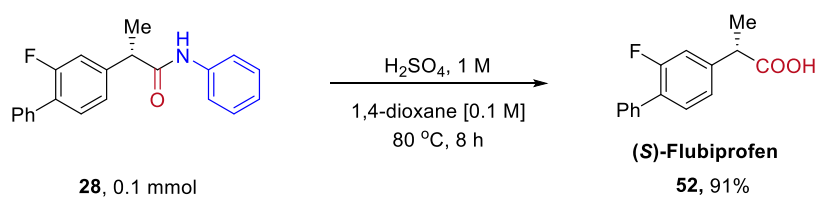

A solution of compounds **28**, 0.1 mmol in 1 M H<sub>2</sub>SO<sub>4</sub> (aq, 1.0 mL) and 1,4-dioxane (1.0 mL) was stirred at 80 °C for 8 hours. After the reaction was complete, the mixture was cooled down to room temperature. The mixture was extracted with CH<sub>2</sub>Cl<sub>2</sub> (20 mL × 3). The organic layers were dried over sodium sulfate and concentrated. The residue was then purified by flash column chromatography (silica gel, pentane with 10% EtOAc) to give the corresponding (*S*)-flubiprofen **52**<sup>6</sup> (22.3 mg, 91% yield).

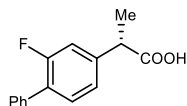

**(*S*)-2-(2-fluoro-[1,1'-biphenyl]-4-yl)propanoic acid (52)**

**<sup>1</sup>H NMR** (400 MHz, CDCl<sub>3</sub>) δ 7.54 – 7.52 (m, 2H), 7.45 – 7.34 (m, 4H), 7.19 – 7.13 (m, 2H), 3.79 (q, *J* = 7.2 Hz, 1H), 1.56 (d, *J* = 7.2 Hz, 3H).

**<sup>13</sup>C NMR** (101 MHz, CDCl<sub>3</sub>) δ 180.15, 159.85 (d, *J* = 249.5 Hz), 141.09, 135.56, 131.03, 129.11, 128.60, 128.31(d, *J* = 13 Hz), 127.86, 123.83, 115.53 (d, *J* = 23 Hz), 44.97, 18.15.

**<sup>19</sup>F NMR** (377 MHz, CDCl<sub>3</sub>) δ -117.41 (t, *J* = 8.0 Hz).

[α]<sub>D</sub><sup>25</sup> = 37.0 (c = 0.9, CHCl<sub>3</sub>).

## 8. Mechanistic Studies

### 8.1 Aminium radical cation trap (Figure 2B)

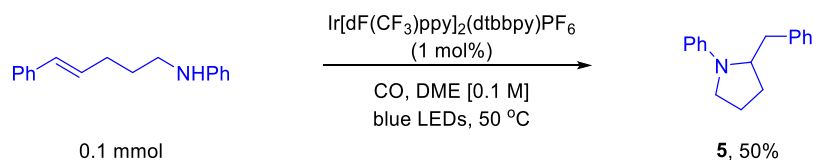

To a flame-dried 20 mL test tube was charged with  $\text{Ir}[\text{dF}(\text{CF}_3)\text{ppy}]_2(\text{dtbbpy})\text{PF}_6$  (1.1 mg, 0.001 mmol, 1 mol%), then the test tube was capped by rubber plug with 3M tape. After it was evacuated and backfilled with a CO three times, DME (1 mL) was added via a syringe, followed by the addition of with aniline **4** (0.1 mmol, 1.0 equiv.). The reaction mixture was allowed to stir for 12 hours at 50 °C by 90 W blue LEDs, and then quenched with water and extracted with EtOAc. The combined organic layers were washed by brine, dried over  $\text{MgSO}_4$ , and concentrated. The residue was purified by flash column chromatography (silica gel, pentane with 3% EtOAc) to afford the product **5**.

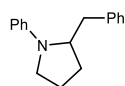

#### 2-benzyl-1-phenylpyrrolidine (**5**)<sup>3</sup>

<sup>1</sup>H NMR (400 MHz,  $\text{CDCl}_3$ )  $\delta$  7.36 – 7.23 (m, 7H), 6.74 – 6.70 (m, 3H), 4.00 (ddd,  $J$  = 9.2, 6.3, 2.8 Hz, 1H), 3.48 – 3.43 (m, 1H), 3.24 – 3.18 (m, 1H), 3.10 (dd,  $J$  = 13.6, 2.9 Hz, 1H), 2.59 (dd,  $J$  = 13.6, 9.6 Hz, 1H), 1.97 – 1.85 (m, 4H).

<sup>13</sup>C NMR (101 MHz,  $\text{CDCl}_3$ )  $\delta$  147.08, 139.66, 129.51, 129.47, 128.55, 126.31, 115.60, 111.95, 59.89, 48.48, 38.69, 29.60, 23.14.

### 8.2 Benzyl radical trap (Figure 2c)

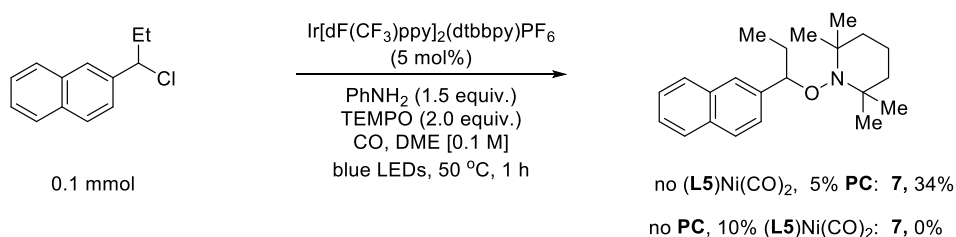

To a flame-dried 20 mL test tube was charged with Ir[dF(CF<sub>3</sub>)ppy]<sub>2</sub>(dtbbpy)PF<sub>6</sub> (5.5 mg, 0.005 mmol, 5 mol%), 2-(1-chloropropyl)naphthalene (20.4 mg, 0.1 mmol, 1.0 equiv.), TEMPO (31.2 mg, 0.2 mmol, 2.0 equiv.), then the test tube was capped by rubber plug with 3M tape. After it was evacuated and backfilled with a CO three times, DME (1 mL) was added via a syringe, followed by the addition of PhNH<sub>2</sub> (13.7  $\mu$ L, 0.15 mmol, 1.5 equiv.). The reaction mixture was allowed to stir for 1 hour at 50 °C by 90 W blue LEDs, and then quenched with water and extracted with EtOAc (10 mL). The combined organic layers were washed by brine (2 $\times$ 5 mL), dried over MgSO<sub>4</sub>, and concentrated. The residue was purified by flash column chromatography (silica gel, pentane) to afford product **7**.

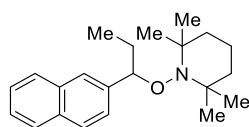

### 2,2,6,6-tetramethyl-1-(1-(naphthalen-2-yl)propoxy)piperidine (**7**)

<sup>1</sup>H NMR (400 MHz, CDCl<sub>3</sub>)  $\delta$  7.88 – 7.81 (m, 3H), 7.69 (s, 1H), 7.50 – 7.43 (m, 3H), 4.71 (dd, *J* = 9.7, 3.7 Hz, 1H), 2.24 – 2.14 (m, 1H), 1.96 – 1.85 (m, 1H), 1.52 (s, 3H), 1.37 – 1.20 (m, 9H), 1.04 (s, 3H), 0.69 (t, *J* = 7.5 Hz, 3H), 0.57 (s, 3H).

<sup>13</sup>C NMR (101 MHz, CDCl<sub>3</sub>)  $\delta$  141.11, 133.21, 132.91, 128.08, 127.77, 127.72, 126.74, 125.94, 125.86, 125.51, 89.07, 60.12, 59.74, 40.60, 34.41, 29.86, 28.85, 20.52, 17.35, 9.89.

HRMS (ESI): C<sub>22</sub>H<sub>32</sub>NO<sup>+</sup> (*M*+H<sup>+</sup>): 326.2478, found: 326.2480.

### 8.3 Radical trap with BHT (Figure 4D)

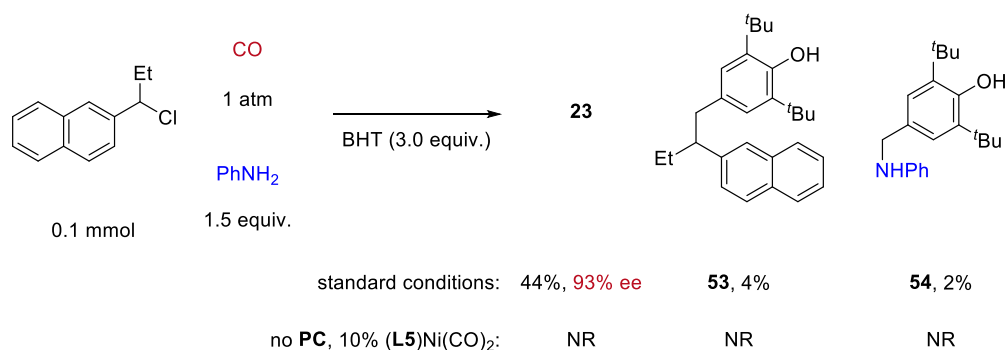

According to General Procedure with the addition of BHT (72.0 mg, 0.30 mmol, 3.0 equiv.). The reaction mixture was irradiated with blue LED light for 12 hours. The

reaction was quenched with saturated sodium chloride aqueous solution, extracted with EtOAc. The combined organic layers were dried with  $\text{Mg}_2\text{SO}_4$ , filtered, and concentrated in vacuo. The crude material was purified by flash column chromatography (silica gel, pentane with 2% EtOAc) to afford **23** (12.7 mg, 44% yield, 93% ee), benzyl-adduct **53** (1.6 mg, 4% yield) and amino-adduct **54** (0.6 mg, 2% yield). **HPLC**: The ee was determined to be 93% on a CHIRALPAK IA column at 254 nm, 25 °C, with hexane: *i*PrOH = 90:10 at a flow rate 1.0 mL/min. Retention times:  $t_R$  (major) = 12.0 min,  $t_R$  (minor) = 15.4 min.

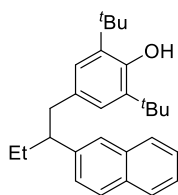

**2,6-di-tert-butyl-4-(2-(naphthalen-2-yl)butyl)phenol (53)**

$^1\text{H}$  NMR (400 MHz,  $\text{CDCl}_3$ )  $\delta$  7.81 – 7.73 (m, 3H), 7.53 (s, 1H), 7.48 – 7.42 (m, 2H), 7.21 – 7.19 (m, 1H), 6.62 (d,  $J$  = 4.0 Hz, 1H), 6.48 (d,  $J$  = 4.0 Hz, 1H), 2.77 (dd,  $J$  = 12.0, 4.0 Hz, 1H), 1.85 – 1.75 (m, 1H), 1.70 – 1.62 (m, 1H), 1.27 (s, 9H), 1.14 (s, 2H), 1.08 (s, 9H), 0.69 (t,  $J$  = 8.0 Hz, 3H).

**HRMS** (FI):  $\text{C}_{28}\text{H}_{36}\text{O}$  (M): 388.2766, found: 388.2862.

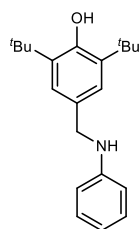

**2,6-di-tert-butyl-4-((phenylamino)methyl)phenol (54)**<sup>15</sup>

The title compound was isolated by flash chromatography (Petroleum ether: EtOAc = 30:1) as a white solid (0.6 mg, 2%).

$^1\text{H}$  NMR (400 MHz,  $\text{CDCl}_3$ )  $\delta$  7.23 – 7.19 (m, 4H), 6.75 – 6.68 (m, 3H), 5.20 (s, 1H), 4.19 (s, 2H), 1.45 (s, 18H).

$^{13}\text{C}$  NMR (101 MHz,  $\text{CDCl}_3$ )  $\delta$  153.29, 148.51, 136.24, 129.75, 129.39, 125.16, 117.66, 113.02, 49.18, 34.50, 30.42.

#### 8.4 Synthesis of (L5)Ni(CO)<sub>2</sub> B (Figure 4F)



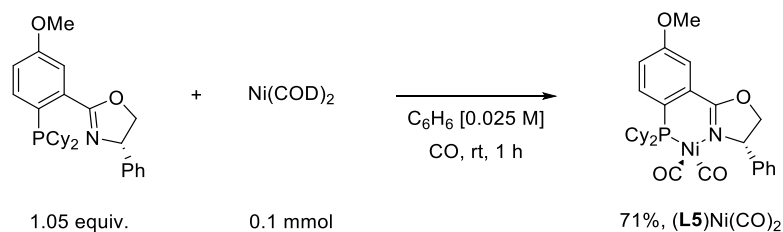

In the glovebox under nitrogen atmosphere, to an oven-dried 25 mL Schlenk flask equipped with Teflon cap and stir bar was charged Ni(COD)<sub>2</sub> (0.1 mmol) and (*S*)-**L5** (0.105 mmol) in C<sub>6</sub>H<sub>6</sub> (4 mL). The flask was sealed, brought out of the glovebox and connected to the Schlenk line. The Schlenk flask was evacuated by freeze-pump-thaw cycle followed by loading of 4 atmospheric pressure of carbon monoxide. The reaction was allowed to stir at room temperature for 1 hour. Excess carbon monoxide was evacuated by freeze-pump-thaw cycle on the Schlenk line. The reaction was brought into the glovebox and solvent was removed under reduced pressure. The remaining solid was dissolved in pentane (3 mL) and extracted with acetonitrile (3 mL). the acetonitrile layer was collected, and solvent was removed by high vacuum.

The title compound was obtained as an orange solid, 71% yield.

<sup>1</sup>H NMR (500 MHz, C<sub>6</sub>D<sub>6</sub>) δ 7.87 – 7.75 (m, 1H), 7.38 – 7.35 (m, 1H), 7.22 – 7.19 (m, 2H), 7.15 – 7.13 (m, 3H), 6.79 (dd, *J* = 8.5, 2.8 Hz, 1H), 5.02 (dd, *J* = 10.0, 7.5 Hz, 1H), 3.86 – 3.77 (m, 2H), 3.29 (s, 3H), 2.10 – 1.96 (m, 3H), 1.84 – 1.72 (m, 2H), 1.65 – 1.47 (m, 8H), 1.39 – 1.31 (m, 2H), 1.27 – 1.05 (m, 7H).

<sup>13</sup>C NMR (126 MHz, CDCl<sub>3</sub>) δ 201.03, 200.05, 162.45, 160.45, 141.32, 134.16, 133.29 (d, *J* = 15.1 Hz), 129.00, 128.82, 128.64, 123.77 (d, *J* = 10.1 Hz), 117.18, 116.76, 77.39, 72.63, 54.92, 36.35 (d, *J* = 13.9 Hz), 36.05 (d, *J* = 13.9 Hz), 28.71, 28.63, 27.58, 27.47, 27.36, 27.27, 27.21, 26.68, 26.63.

<sup>31</sup>P NMR (162 MHz, C<sub>6</sub>D<sub>6</sub>) δ 28.68.

HRMS (ESI): [C<sub>30</sub>H<sub>35</sub>NO<sub>4</sub>PNi]<sup>+</sup>: 562.1652, found: 562.1629.

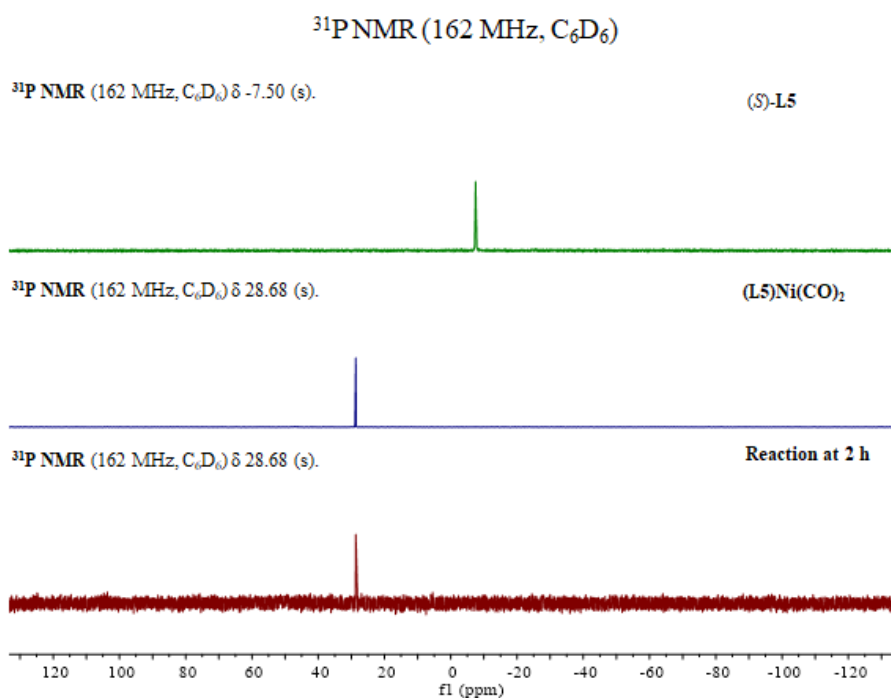

### $^{31}\text{P}$ NMR analysis of the reaction mixture

## 8.5 Determination of quantum yield

We utilized protocol reported by Chiba and co-workers to determine the photon flux of blue LED.<sup>16</sup> All solutions were stored in the black vial and stored in the dark when not in use. Measurements were performed with the lights off to protect the samples from ambient light as much as possible.

### a) Preparation of stock solutions

A 0.15 M solution of ferrioxalate was obtained by dissolving potassium ferrioxalate trihydrate ( $[\text{K}_3\text{Fe}^{\text{III}}(\text{C}_2\text{O}_4)_3] \cdot 3\text{H}_2\text{O}$ ; 1.11 g, 2.26 mmol) in 0.05 M  $\text{H}_2\text{SO}_4$  (prepared by fresh deionized water) (15 mL total volume).

A buffered phenanthroline solution was obtained by dissolving 1,10-phenanthroline (10.0 mg) and sodium acetate (2.25 g) in 0.5 M  $\text{H}_2\text{SO}_4$  (prepared by fresh deionized water) (10 mL total volume).<sup>16</sup>

### b) Determination of background $\text{Fe}^{2+}$ concentration

2 mL of the ferrioxalate solution was added to a 8 mL vial. Next, 0.35 mL of the phenanthroline solution was added and the mixture was stored in the dark for 1 hour. Then the solution was transferred to a cuvette and a UV–vis spectrum was measured using UV–vis absorption spectrometer ( $\lambda_{950}$ ). The absorbance value at 510 nm was recorded. This process was repeated twice. Average value: 1.653546.

### c) Determination of photon flux

2 mL of the ferrioxalate solution was added to a 8 mL vial. The vial was immediately irradiated with blue LED light ( $\lambda_{\max} = 467$  nm) for 20 seconds and removed from the blue LED. Then, 0.35 mL of the phenanthroline solution was added to the ferrioxalate solution, and the resulting mixture was stored in the dark for 1 hour. Then the solution was transferred to a cuvette and the UV–vis spectrum was measured. The absorbance value at 510 nm was recorded. This process was repeated twice. Average value: 3.793243.

### d) Calculations

The amount of  $\text{Fe}^{2+}$  formed was calculated according to the following equation:

$$\text{mol Fe}^{2+} = \frac{V \cdot \Delta A}{l \cdot \varepsilon}$$

where  $V$  is the volume of the sample analyzed (2.35 mL),  $\Delta A$  is the difference in average absorbances (between irradiated and unirradiated ferrioxalate solutions) at 510 nm,  $l$  is the path length, and  $\varepsilon$  is the molar absorptivity at 510 nm.<sup>17</sup>

$$\text{mol Fe}^{2+} = \frac{V \cdot \Delta A}{l \cdot \varepsilon} = \frac{(0.00235 \text{ L})(2.139697)}{(1 \text{ cm})(11100 \text{ L/mol} \cdot \text{cm})} = 45.299 \cdot 10^{-8} \text{ mol}$$

The fraction of light absorbed by the ferrioxalate actinometer was calculated by the following equation:

$$f = 1 - 10^{-A}$$

where  $A$  is the absorbance at 468 nm of the ferrioxalate actinometer solution prior to irradiation and addition of phenanthroline (**Figure S8**).

$$f = 1 - 10^{-A} = 1 - 10^{-0.520746} = 0.698523$$

The photon flux was calculated using the following equation:

$$\text{photon flux} = \frac{\text{mol Fe}^{2+}}{\Phi \cdot t \cdot f}$$

Where  $\Phi$  is the quantum yield for the ferrioxalate actinometer at 468 nm,<sup>17</sup>  $t$  is the time and  $f$  is the fraction of light absorbed by the ferrioxalate actinometer solution.

$$\begin{aligned} \text{photon flux} &= \frac{\text{mol Fe}^{2+}}{\Phi \cdot t \cdot f} = \frac{45.299 \cdot 10^{-8} \text{ mol}}{(0.92) \cdot (10\text{s}) \cdot (0.698523)} \\ &= 7.048879 \cdot 10^{-8} \text{ einstein/s} \end{aligned}$$

#### e) Determination of fraction of light absorbed at 468 nm for the ferrioxalate solution

The absorbance at 468 nm of the ferrioxalate actinometer solution prior to irradiation and addition of phenanthroline was measured to be 0.520746.

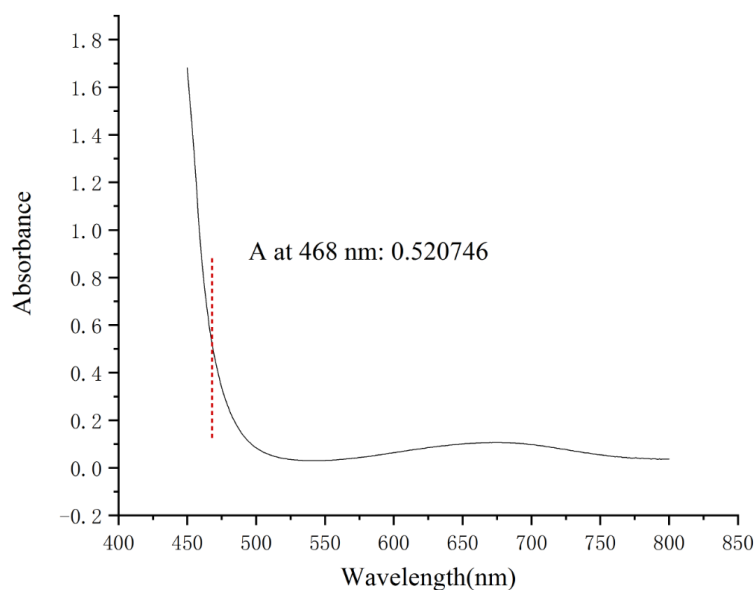

**Supplementary Figure S8** UV-vis absorbance spectra of ferrioxalate solution

#### f) Absorbance of photocatalyst $\text{Ir(ppy)}_2(\text{dCO}_2\text{Etbp}) \cdot (\text{PF}_6)$

The absorbance of  $\text{Ir(ppy)}_2(\text{dCO}_2\text{Etbp}) \cdot (\text{PF}_6)$  in DME and EtOAc was measured at the reaction concentration of 2 mM or a dilute concentration of 25  $\mu\text{M}$  (**Figure S10**).

The absorbance at 468 nm for 2 mM is 1.600001.

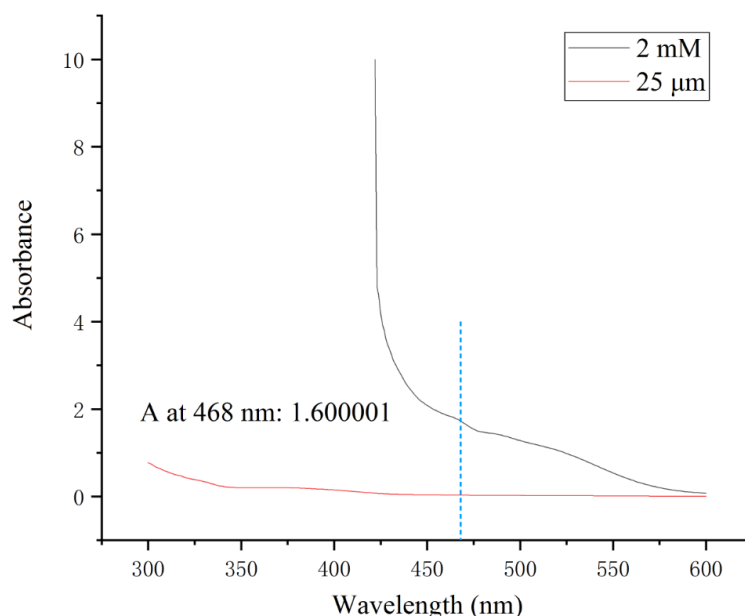

**Supplementary Figure S9** UV-vis absorbance spectra of Ir(ppy)<sub>2</sub>(dCO<sub>2</sub>Et bpy)·(PF<sub>6</sub>)  
black line: 2 mM in DME and EtOAc, red line: 25 μM in DME and EtOAc.

#### g) Determination of quantum yield

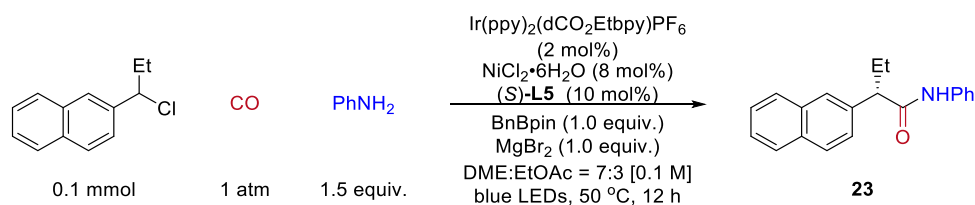

To a flame-dried 20 mL test tube was charged with 2-(1-chloropropyl)naphthalene (20.4 mg, 0.1 mmol, 1.0 equiv.), Ir(ppy)<sub>2</sub>(dCO<sub>2</sub>Et bpy)]PF<sub>6</sub> (2.0 mg, 0.002 mmol, 2 mol%), (S)-L5 (4.5 mg, 0.01 mmol, 10 mol%), NiCl<sub>2</sub>·6H<sub>2</sub>O (1.9 mg, 0.008 mmol, 8 mol%) and MgBr<sub>2</sub> (18.4 mg, 0.1 mmol, 1.0 equiv.). Then the test tube was capped by rubber plug with 3M tape. After it was evacuated and backfilled with a CO balloon three times, DME /EtOAc (7:3) (1 mL) was added via a syringe, followed by the addition of with aniline (13.7 μL, 0.15 mmol, 1.5 equiv.), BnBPin (22.3 μL, 0.1 mmol, 1.0 equiv.). Once added, the reaction mixture was then irradiated with a blue LED light ( $\lambda_{\text{max}} = 467 \text{ nm}$ , 393 mW/cm<sup>2</sup>, Kessil A360W E-SERIES TUNA Blue LED, at approximately 3 cm away from the light source) for 1800 seconds. After irradiation, the reaction mixtures were analyzed by GC with an internal standard. Provide the

desired product (19 % GC yield). The quantum yield ( $\Phi$ ) was calculated using the following equation:

The quantum yield ( $\Phi$ ) was calculated using the following equation:

$$\Phi = \frac{\text{mol product}}{\text{photon flux} \cdot t \cdot f}$$

Where  $t$  is the reaction time and  $f$  is the fraction of light absorbed by photocatalyst that was calculated using the following equation:

$$f = 1 - 10^{-A} = 1 - 10^{-1.600001} = 0.97488$$

Where  $A$  is the absorbance at 468 nm of the photocatalyst solution (2 mM in DME and EtOAc) (**Figure S10**).

$$\begin{aligned} \Phi &= \frac{\text{mol product}}{\text{photon flux} \cdot t \cdot f} = \frac{0.000019 \text{ mol}}{(7.048879 \cdot 10^{-8} \text{ einstein/s}) \cdot (1800 \text{ s}) \cdot (0.97488)} \\ &= 0.154 \end{aligned}$$

## 9. X-Ray Crystallographic Data

### 9.1 X-Ray Crystallographic Analysis of 23

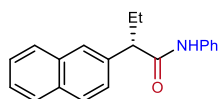

CCDC: 2324911

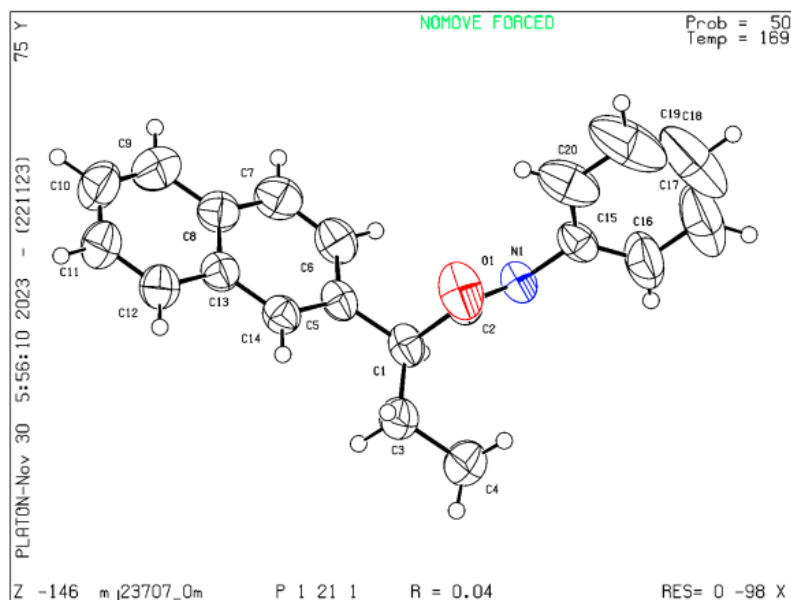

Supplementary Figure S10 X-ray structure of 23

### Supplementary Table S7 Crystal data and structure refinement for mj23707\_0m.

|                     |                                    |
|---------------------|------------------------------------|
| Identification code | mj23707_0m                         |
| Empirical formula   | C <sub>20</sub> H <sub>19</sub> NO |
| Formula weight      | 289.36                             |
| Temperature/K       | 169.00                             |
| Crystal system      | monoclinic                         |
| Space group         | P2 <sub>1</sub>                    |
| a/Å                 | 4.87580(10)                        |
| b/Å                 | 10.6693(3)                         |
| c/Å                 | 15.5772(4)                         |
| $\alpha$ /°         | 90                                 |
| $\beta$ /°          | 98.1810(10)                        |
| $\gamma$ /°         | 90                                 |

|                                             |                                                               |
|---------------------------------------------|---------------------------------------------------------------|
| Volume/Å <sup>3</sup>                       | 802.10(3)                                                     |
| Z                                           | 2                                                             |
| ρ <sub>calc</sub> /g/cm <sup>3</sup>        | 1.198                                                         |
| μ/mm <sup>-1</sup>                          | 0.363                                                         |
| F(000)                                      | 308.0                                                         |
| Crystal size/mm <sup>3</sup>                | 0.17 × 0.17 × 0.05                                            |
| Radiation                                   | GaKα (λ = 1.34139)                                            |
| 2Θ range for data collection/°              | 4.986 to 109.86                                               |
| Index ranges                                | -5 ≤ h ≤ 5, -12 ≤ k ≤ 13, -18 ≤ l ≤ 18                        |
| Reflections collected                       | 13354                                                         |
| Independent reflections                     | 3007 [R <sub>int</sub> = 0.0420, R <sub>sigma</sub> = 0.0351] |
| Data/restraints/parameters                  | 3007/37/200                                                   |
| Goodness-of-fit on F <sup>2</sup>           | 1.055                                                         |
| Final R indexes [I ≥ 2σ (I)]                | R <sub>1</sub> = 0.0400, wR <sub>2</sub> = 0.1021             |
| Final R indexes [all data]                  | R <sub>1</sub> = 0.0419, wR <sub>2</sub> = 0.1040             |
| Largest diff. peak/hole / e Å <sup>-3</sup> | 0.15/-0.19                                                    |
| Flack parameter                             | -0.09(13)                                                     |

**Supplementary Table S8 Fractional Atomic Coordinates (×10<sup>4</sup>) and Equivalent Isotropic Displacement Parameters (Å<sup>2</sup>×10<sup>3</sup>) for mj23707\_0m. U<sub>eq</sub> is defined as 1/3 of the trace of the orthogonalised U<sub>ij</sub> tensor.**

| Atom | x       | y          | z          | U(eq)   |
|------|---------|------------|------------|---------|
| O1   | 4348(3) | 6894(2)    | 2669.9(14) | 78.8(7) |
| N1   | 217(3)  | 7230.9(18) | 3128.2(12) | 50.6(5) |
| C1   | 333(4)  | 5988(2)    | 1825.3(15) | 53.6(6) |
| C2   | 1828(4) | 6745(2)    | 2579.6(15) | 52.2(5) |
| C3   | 852(6)  | 6572(3)    | 970.3(18)  | 66.5(7) |
| C4   | -308(7) | 7889(3)    | 846(2)     | 83.6(9) |
| C5   | 1216(4) | 4625(2)    | 1951.4(15) | 51.4(5) |
| C6   | 198(6)  | 3925(3)    | 2606.6(19) | 69.5(7) |
| C7   | 932(6)  | 2710(3)    | 2764(2)    | 76.1(8) |



**Supplementary Table S8 Fractional Atomic Coordinates ( $\times 10^4$ ) and Equivalent Isotropic Displacement Parameters ( $\text{\AA}^2 \times 10^3$ ) for mj23707\_0m.  $U_{\text{eq}}$  is defined as 1/3 of the trace of the orthogonalised  $U_{\text{ij}}$  tensor.**

| Atom | <i>x</i> | <i>y</i> | <i>z</i>   | $U(\text{eq})$ |
|------|----------|----------|------------|----------------|
| C8   | 2722(5)  | 2089(3)  | 2268.2(17) | 63.6(6)        |
| C9   | 3542(7)  | 815(3)   | 2402(2)    | 84.0(9)        |
| C10  | 5196(8)  | 251(3)   | 1888(3)    | 87.5(9)        |
| C11  | 6188(8)  | 925(3)   | 1231(2)    | 84.4(9)        |
| C12  | 5479(6)  | 2147(3)  | 1086.1(19) | 73.0(8)        |
| C13  | 3724(5)  | 2768(2)  | 1601.9(15) | 56.0(6)        |
| C14  | 2960(5)  | 4039(2)  | 1464.3(15) | 53.8(5)        |
| C15  | 1160(5)  | 7948(3)  | 3879.1(15) | 57.6(6)        |
| C16  | -208(10) | 9005(4)  | 4047(3)    | 102.2(12)      |
| C17  | 704(17)  | 9710(6)  | 4790(4)    | 147(2)         |
| C18  | 2878(16) | 9324(8)  | 5360(4)    | 160(3)         |
| C19  | 4226(13) | 8278(8)  | 5196(3)    | 158(2)         |
| C20  | 3386(8)  | 7568(5)  | 4451(2)    | 109.3(14)      |

**Supplementary Table S9 Anisotropic Displacement Parameters ( $\text{\AA}^2 \times 10^3$ ) for mj23707\_0m. The Anisotropic displacement factor exponent takes the form:  $-2\pi^2[\text{h}^2\text{a}^{*2}U_{11}+2\text{hka}^*\text{b}^*U_{12}+\dots]$ .**

| Atom | $U_{11}$ | $U_{22}$  | $U_{33}$ | $U_{23}$  | $U_{13}$ | $U_{12}$ |
|------|----------|-----------|----------|-----------|----------|----------|
| O1   | 32.4(7)  | 104.5(16) | 99.7(14) | -34.5(13) | 10.3(8)  | -3.8(9)  |
| N1   | 35.3(8)  | 64.1(12)  | 52.3(10) | -13.9(9)  | 6.0(7)   | -1.2(8)  |
| C1   | 37.8(10) | 65.2(14)  | 58.2(13) | -15.4(11) | 7.7(9)   | 4.3(10)  |
| C2   | 33.7(10) | 61.1(14)  | 61.8(13) | -10.1(11) | 6.7(9)   | 2.5(9)   |
| C3   | 68.7(15) | 68.2(16)  | 62.5(14) | -5.1(12)  | 8.8(12)  | 14.4(13) |
| C4   | 92(2)    | 75.2(19)  | 81.0(18) | -2.5(17)  | 3.3(16)  | 21.0(17) |
| C5   | 40.9(11) | 62.3(14)  | 50.7(12) | -13.0(10) | 5.5(9)   | -1.4(10) |
| C6   | 66.4(16) | 82(2)     | 64.8(15) | -7.9(14)  | 25.2(13) | -0.1(14) |

**Supplementary Table S9 Anisotropic Displacement Parameters ( $\text{\AA}^2 \times 10^3$ ) for mj23707\_0m. The Anisotropic displacement factor exponent takes the form:  $-2\pi^2[h^2a^{*2}U_{11}+2hka^*b^*U_{12}+\dots]$ .**

| Atom | U <sub>11</sub> | U <sub>22</sub> | U <sub>33</sub> | U <sub>23</sub> | U <sub>13</sub> | U <sub>12</sub> |
|------|-----------------|-----------------|-----------------|-----------------|-----------------|-----------------|
| C7   | 78.8(19)        | 86(2)           | 67.1(16)        | 7.5(15)         | 23.6(14)        | -6.4(16)        |
| C8   | 59.8(13)        | 66.9(16)        | 62.3(15)        | -1.2(13)        | 2.9(11)         | -0.2(12)        |
| C9   | 89(2)           | 76(2)           | 86.6(19)        | 15.0(17)        | 9.4(17)         | 0.7(17)         |
| C10  | 94(2)           | 65.1(17)        | 101(2)          | 0.0(18)         | 5.9(19)         | 19.3(17)        |
| C11  | 92(2)           | 72.7(19)        | 88(2)           | -6.2(17)        | 12.2(17)        | 27.4(17)        |
| C12  | 76.8(17)        | 74.1(18)        | 70.0(16)        | -4.2(15)        | 16.9(13)        | 19.8(15)        |
| C13  | 49.7(12)        | 62.7(14)        | 54.4(12)        | -5.4(11)        | 2.9(10)         | 4.0(11)         |
| C14  | 49.0(12)        | 61.6(14)        | 51.3(12)        | -4.0(11)        | 9.0(9)          | 2.5(10)         |
| C15  | 61.1(13)        | 67.2(14)        | 47.1(11)        | -7.1(11)        | 16.3(10)        | -18.5(11)       |
| C16  | 131(3)          | 93(2)           | 90(2)           | -33(2)          | 41(2)           | 7(2)            |
| C17  | 214(6)          | 122(4)          | 124(4)          | -60(3)          | 93(4)           | -46(4)          |
| C18  | 197(6)          | 210(6)          | 87(3)           | -66(4)          | 68(3)           | -129(5)         |
| C19  | 147(4)          | 245(7)          | 72(3)           | -18(3)          | -20(3)          | -75(5)          |
| C20  | 98(2)           | 155(4)          | 65.6(18)        | -8(2)           | -22.6(17)       | -17(2)          |

**Supplementary Table S10 Bond Lengths for mj23707\_0m.**

| Atom | Atom | Length/ $\text{\AA}$ | Atom | Atom | Length/ $\text{\AA}$ |
|------|------|----------------------|------|------|----------------------|
| O1   | C2   | 1.227(3)             | C8   | C13  | 1.409(4)             |
| N1   | C2   | 1.344(3)             | C9   | C10  | 1.356(5)             |
| N1   | C15  | 1.418(3)             | C10  | C11  | 1.393(5)             |
| C1   | C2   | 1.523(3)             | C11  | C12  | 1.360(5)             |
| C1   | C3   | 1.524(4)             | C12  | C13  | 1.419(4)             |
| C1   | C5   | 1.522(3)             | C13  | C14  | 1.415(4)             |
| C3   | C4   | 1.517(4)             | C15  | C16  | 1.355(5)             |
| C5   | C6   | 1.411(4)             | C15  | C20  | 1.365(5)             |

**Supplementary Table S10 Bond Lengths for mj23707\_0m.**

| Atom | Atom | Length/Å | Atom | Atom | Length/Å  |
|------|------|----------|------|------|-----------|
| C5   | C14  | 1.368(3) | C16  | C17  | 1.399(7)  |
| C6   | C7   | 1.358(5) | C17  | C18  | 1.346(11) |
| C7   | C8   | 1.410(4) | C18  | C19  | 1.338(11) |
| C8   | C9   | 1.424(5) | C19  | C20  | 1.398(7)  |

**Supplementary Table S11 Bond Angles for mj23707\_0m.**

| Atom | Atom | Atom | Angle/°    | Atom | Atom | Atom | Angle/°  |
|------|------|------|------------|------|------|------|----------|
| C2   | N1   | C15  | 125.61(19) | C10  | C9   | C8   | 121.0(3) |
| C2   | C1   | C3   | 109.7(2)   | C9   | C10  | C11  | 120.2(3) |
| C5   | C1   | C2   | 108.16(18) | C12  | C11  | C10  | 120.7(3) |
| C5   | C1   | C3   | 115.14(19) | C11  | C12  | C13  | 120.9(3) |
| O1   | C2   | N1   | 122.9(2)   | C8   | C13  | C12  | 118.5(2) |
| O1   | C2   | C1   | 121.3(2)   | C8   | C13  | C14  | 119.5(2) |
| N1   | C2   | C1   | 115.85(17) | C14  | C13  | C12  | 121.9(2) |
| C4   | C3   | C1   | 112.7(2)   | C5   | C14  | C13  | 121.6(2) |
| C6   | C5   | C1   | 118.5(2)   | C16  | C15  | N1   | 119.9(3) |
| C14  | C5   | C1   | 123.5(2)   | C16  | C15  | C20  | 119.3(3) |
| C14  | C5   | C6   | 118.1(2)   | C20  | C15  | N1   | 120.8(3) |
| C7   | C6   | C5   | 121.7(3)   | C15  | C16  | C17  | 120.0(5) |
| C6   | C7   | C8   | 121.1(3)   | C18  | C17  | C16  | 120.6(6) |
| C7   | C8   | C9   | 123.4(3)   | C19  | C18  | C17  | 119.5(5) |
| C13  | C8   | C7   | 118.0(3)   | C18  | C19  | C20  | 121.1(6) |
| C13  | C8   | C9   | 118.6(3)   | C15  | C20  | C19  | 119.5(5) |

**Supplementary Table S12 Torsion Angles for mj23707\_0m.**

| A | B | C | D | Angle/° | A | B | C | D | Angle/° |
|---|---|---|---|---------|---|---|---|---|---------|
|---|---|---|---|---------|---|---|---|---|---------|

**Supplementary Table S12 Torsion Angles for mj23707\_0m.**

| A  | B   | C   | D   | Angle/°   | A   | B   | C   | D   | Angle/°   |
|----|-----|-----|-----|-----------|-----|-----|-----|-----|-----------|
| N1 | C15 | C16 | C17 | 179.6(3)  | C7  | C8  | C13 | C12 | -178.7(3) |
| N1 | C15 | C20 | C19 | -178.4(4) | C7  | C8  | C13 | C14 | 1.2(3)    |
| C1 | C5  | C6  | C7  | -179.0(3) | C8  | C9  | C10 | C11 | 1.8(5)    |
| C1 | C5  | C14 | C13 | -179.9(2) | C8  | C13 | C14 | C5  | -1.4(3)   |
| C2 | N1  | C15 | C16 | 135.4(3)  | C9  | C8  | C13 | C12 | 0.8(4)    |
| C2 | N1  | C15 | C20 | -46.5(4)  | C9  | C8  | C13 | C14 | -179.3(3) |
| C2 | C1  | C3  | C4  | -63.1(3)  | C9  | C10 | C11 | C12 | -1.1(5)   |
| C2 | C1  | C5  | C6  | 72.8(3)   | C10 | C11 | C12 | C13 | 0.2(5)    |
| C2 | C1  | C5  | C14 | -106.9(2) | C11 | C12 | C13 | C8  | -0.1(4)   |
| C3 | C1  | C2  | O1  | -58.9(3)  | C11 | C12 | C13 | C14 | 180.0(3)  |
| C3 | C1  | C2  | N1  | 120.9(2)  | C12 | C13 | C14 | C5  | 178.5(2)  |
| C3 | C1  | C5  | C6  | -164.2(2) | C13 | C8  | C9  | C10 | -1.7(5)   |
| C3 | C1  | C5  | C14 | 16.1(3)   | C14 | C5  | C6  | C7  | 0.8(4)    |
| C5 | C1  | C2  | O1  | 67.4(3)   | C15 | N1  | C2  | O1  | -1.2(4)   |
| C5 | C1  | C2  | N1  | -112.8(2) | C15 | N1  | C2  | C1  | 179.0(2)  |
| C5 | C1  | C3  | C4  | 174.7(2)  | C15 | C16 | C17 | C18 | -2.4(7)   |
| C5 | C6  | C7  | C8  | -0.9(5)   | C16 | C15 | C20 | C19 | -0.4(6)   |
| C6 | C5  | C14 | C13 | 0.4(3)    | C16 | C17 | C18 | C19 | 2.2(8)    |
| C6 | C7  | C8  | C9  | -179.6(3) | C17 | C18 | C19 | C20 | -1.1(9)   |
| C6 | C7  | C8  | C13 | -0.1(4)   | C18 | C19 | C20 | C15 | 0.2(8)    |
| C7 | C8  | C9  | C10 | 177.8(3)  | C20 | C15 | C16 | C17 | 1.5(6)    |

**Supplementary Table S13 Hydrogen Atom Coordinates ( $\text{\AA} \times 10^4$ ) and Isotropic Displacement Parameters ( $\text{\AA}^2 \times 10^3$ ) for mj23707\_0m.**

| Atom | x        | y       | z       | U(eq) |
|------|----------|---------|---------|-------|
| H1   | -1576.36 | 7092.41 | 3011.28 | 61    |
| H1A  | -1699.82 | 6035.54 | 1854.03 | 64    |

**Supplementary Table S13 Hydrogen Atom Coordinates ( $\text{\AA}\times 10^4$ ) and Isotropic Displacement Parameters ( $\text{\AA}^2\times 10^3$ ) for mj23707\_0m.**

| Atom | <i>x</i> | <i>y</i> | <i>z</i> | U(eq) |
|------|----------|----------|----------|-------|
| H3A  | 2871.96  | 6596.21  | 951.18   | 80    |
| H3B  | -5.59    | 6037.76  | 485.57   | 80    |
| H4A  | -49.56   | 8196.63  | 269.77   | 125   |
| H4B  | 664.76   | 8442.29  | 1290.62  | 125   |
| H4C  | -2288.68 | 7878.94  | 895.88   | 125   |
| H6   | -1033.11 | 4313.78  | 2946.31  | 83    |
| H7   | 228.67   | 2270.15  | 3216.34  | 91    |
| H9   | 2920.88  | 353.67   | 2859.27  | 101   |
| H10  | 5680.26  | -606.69  | 1976.76  | 105   |
| H11  | 7370.55  | 525.96   | 879.48   | 101   |
| H12  | 6169.11  | 2591.61  | 633.58   | 88    |
| H14  | 3674.84  | 4497.94  | 1022.76  | 65    |
| H16  | -1786.39 | 9268.12  | 3660.3   | 123   |
| H17  | -217.79  | 10467.89 | 4893.77  | 176   |
| H18  | 3449.21  | 9790.2   | 5873.76  | 192   |
| H19  | 5778.89  | 8013.28  | 5593.5   | 190   |
| H20  | 4359.32  | 6825.7   | 4343.81  | 131   |

## 9.2 X-Ray Crystallographic Analysis of (*S*)-L5

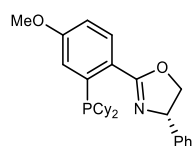

CCDC: 2324906

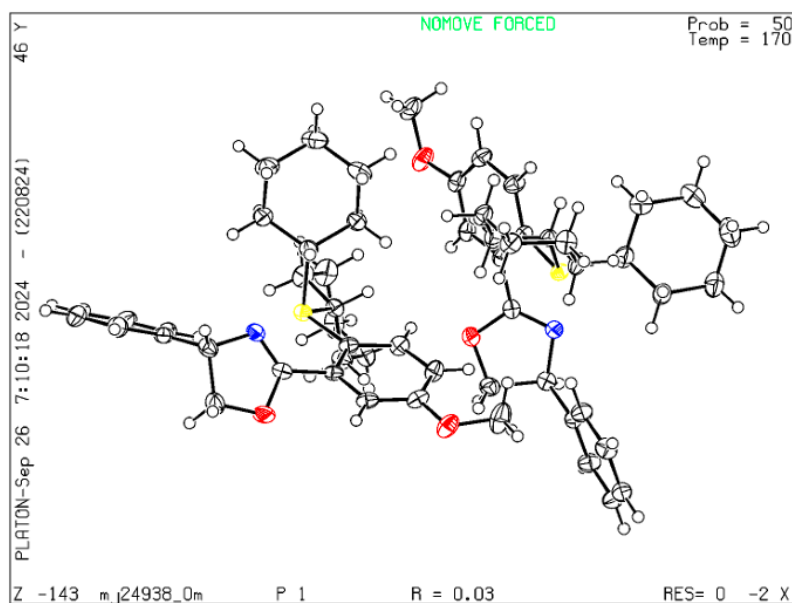

**Supplementary Figure S11** X-ray structure of (*S*)-L5

**Supplementary Table S14** Crystal data and structure refinement for **mj24938\_0m**.

|                                    |                                                   |
|------------------------------------|---------------------------------------------------|
| Identification code                | mj24938_0m                                        |
| Empirical formula                  | C <sub>28</sub> H <sub>36</sub> NO <sub>2</sub> P |
| Formula weight                     | 449.55                                            |
| Temperature/K                      | 170.00                                            |
| Crystal system                     | triclinic                                         |
| Space group                        | P1                                                |
| a/Å                                | 9.8924(2)                                         |
| b/Å                                | 10.4608(2)                                        |
| c/Å                                | 12.6166(2)                                        |
| α/°                                | 76.9300(10)                                       |
| β/°                                | 76.7930(10)                                       |
| γ/°                                | 89.0140(10)                                       |
| Volume/Å <sup>3</sup>              | 1237.32(4)                                        |
| Z                                  | 2                                                 |
| ρ <sub>calc</sub> /cm <sup>3</sup> | 1.207                                             |
| μ/mm <sup>-1</sup>                 | 0.756                                             |
| F(000)                             | 484.0                                             |
| Crystal size/mm <sup>3</sup>       | 0.17 × 0.17 × 0.05                                |
| Radiation                          | GaKα (λ = 1.34139)                                |
| 2θ range for data collection/°     | 7.552 to 109.796                                  |
| Index ranges                       | -12 ≤ h ≤ 12, -12 ≤ k ≤ 11, -15 ≤ l ≤ 15          |
| Reflections collected              | 19858                                             |

|                                                |                                                                  |
|------------------------------------------------|------------------------------------------------------------------|
| Independent reflections                        | 8447 [ $R_{\text{int}} = 0.0352$ , $R_{\text{sigma}} = 0.0451$ ] |
| Data/restraints/parameters                     | 8447/3/579                                                       |
| Goodness-of-fit on $F^2$                       | 1.026                                                            |
| Final R indexes [ $I \geq 2\sigma(I)$ ]        | $R_1 = 0.0324$ , $wR_2 = 0.0831$                                 |
| Final R indexes [all data]                     | $R_1 = 0.0342$ , $wR_2 = 0.0845$                                 |
| Largest diff. peak/hole / $e \text{ \AA}^{-3}$ | 0.49/-0.18                                                       |
| Flack parameter                                | 0.044(8)                                                         |

**Supplementary Table S15 Fractional Atomic Coordinates ( $\times 10^4$ ) and Equivalent Isotropic Displacement Parameters ( $\text{\AA}^2 \times 10^3$ ) for mj24938\_0m.  $U_{\text{eq}}$  is defined as 1/3 of the trace of the orthogonalised  $U_{\text{IJ}}$  tensor.**

| Atom | x          | y              | z          | U(eq)     |
|------|------------|----------------|------------|-----------|
| P1   | 3202.4(6)  | 2065.4(6)<br>) | 6850.4(5)  | 22.22(15) |
| O1   | 2229.4(19) | 5333.4(1<br>9) | 4505.7(16) | 29.2(4)   |
| O2   | 5379(2)    | 3069(2)        | 1862.9(16) | 35.5(5)   |
| N1   | 966(2)     | 3601(2)        | 5729.8(18) | 25.1(5)   |
| C1   | 3748(3)    | 2218(3)        | 5327(2)    | 23.4(6)   |
| C2   | 4781(3)    | 1443(3)        | 4849(2)    | 28.3(6)   |
| C3   | 5328(3)    | 1672(3)        | 3702(2)    | 28.1(6)   |
| C4   | 4871(3)    | 2718(3)        | 2995(2)    | 26.5(6)   |
| C5   | 3810(3)    | 3478(3)        | 3433(2)    | 25.8(6)   |
| C6   | 3238(2)    | 3217(3)        | 4581(2)    | 22.2(5)   |
| C7   | 2077(3)    | 4019(3)        | 4994(2)    | 21.8(5)   |
| C8   | 1068(3)    | 5931(3)        | 5123(2)    | 28.5(6)   |
| C9   | 96(3)      | 4758(3)        | 5829(2)    | 24.6(6)   |
| C10  | -499(3)    | 4844(3)        | 7022(2)    | 23.8(5)   |
| C11  | -1766(3)   | 5426(3)        | 7290(2)    | 31.4(6)   |
| C12  | -2330(3)   | 5537(3)        | 8377(3)    | 34.5(7)   |
| C13  | -1638(3)   | 5063(3)        | 9211(2)    | 32.9(6)   |
| C14  | -376(3)    | 4471(3)        | 8955(2)    | 32.8(7)   |
| C15  | 194(3)     | 4369(3)        | 7868(2)    | 29.9(6)   |
| C16  | 6497(3)    | 2319(4)        | 1404(3)    | 40.1(8)   |
| C17  | 4797(3)    | 1427(3)        | 7309(2)    | 22.3(5)   |
| C18  | 4507(3)    | 1208(3)        | 8587(2)    | 28.6(6)   |
| C19  | 5802(3)    | 834(3)         | 9043(2)    | 33.0(6)   |
| C20  | 6979(3)    | 1851(3)        | 8492(2)    | 31.4(6)   |
| C21  | 7304(3)    | 2000(3)        | 7228(2)    | 31.4(6)   |

|      |           |                |            |           |
|------|-----------|----------------|------------|-----------|
| C22  | 6025(3)   | 2426(3)        | 6768(2)    | 28.3(6)   |
| C23  | 1920(3)   | 657(3)         | 7248(2)    | 32.5(7)   |
| C24  | 978(3)    | 550(3)         | 8409(3)    | 33.2(7)   |
| C25  | -163(4)   | -523(4)        | 8690(3)    | 47.5(8)   |
| C26  | 424(4)    | -1810(4)       | 8544(4)    | 56.4(10)  |
| C27  | 1296(4)   | -1697(4)       | 7351(3)    | 51.7(9)   |
| C28  | 2476(3)   | -657(3)        | 7092(3)    | 41.9(8)   |
| P1A  | 6808.1(6) | 7779.0(6)<br>) | 3185.6(5)  | 21.76(15) |
| O1A  | 7804(2)   | 9946(2)        | 5458.2(18) | 34.9(5)   |
| O2A  | 4360(2)   | 6669(2)        | 8167.1(16) | 35.8(5)   |
| N1A  | 8949(2)   | 8646(2)        | 4364.8(19) | 26.5(5)   |
| C1A  | 6055(3)   | 7373(3)        | 4706(2)    | 23.1(6)   |
| C2A  | 4942(3)   | 6470(3)        | 5216(2)    | 27.5(6)   |
| C3A  | 4354(3)   | 6177(3)        | 6363(2)    | 29.7(6)   |
| C4A  | 4853(3)   | 6849(3)        | 7034(2)    | 28.2(6)   |
| C5A  | 5941(3)   | 7777(3)        | 6559(2)    | 26.2(6)   |
| C6A  | 6562(3)   | 8007(3)        | 5422(2)    | 21.8(5)   |
| C7A  | 7843(3)   | 8864(3)        | 5021(2)    | 22.5(5)   |
| C8A  | 9160(3)   | 10594(3)       | 5002(3)    | 35.2(7)   |
| C9A  | 9964(3)   | 9727(3)        | 4248(2)    | 28.0(6)   |
| C10A | 10506(3)  | 10456(3)       | 3044(2)    | 26.6(6)   |
| C11A | 11813(3)  | 11085(3)       | 2710(3)    | 33.1(7)   |
| C12A | 12319(3)  | 11759(3)       | 1617(3)    | 38.1(7)   |
| C13A | 11524(3)  | 11820(3)       | 833(3)     | 36.9(7)   |
| C14A | 10219(3)  | 11202(3)       | 1157(3)    | 35.0(7)   |
| C15A | 9712(3)   | 10521(3)       | 2249(2)    | 29.5(6)   |
| C16A | 3434(4)   | 5553(4)        | 8723(3)    | 50.3(9)   |
| C17A | 5363(3)   | 7320(3)        | 2607(2)    | 23.8(5)   |
| C18A | 5896(3)   | 7458(3)        | 1335(2)    | 31.8(6)   |
| C19A | 4740(3)   | 7165(4)        | 786(3)     | 40.7(8)   |
| C20A | 3510(3)   | 8028(4)        | 1026(3)    | 39.4(8)   |
| C21A | 2975(3)   | 7896(3)        | 2276(3)    | 30.8(6)   |
| C22A | 4132(3)   | 8212(3)        | 2822(3)    | 29.5(6)   |
| C23A | 8039(3)   | 6400(3)        | 3111(2)    | 24.5(5)   |
| C24A | 9228(3)   | 6697(3)        | 2060(3)    | 32.8(6)   |
| C25A | 10278(3)  | 5603(3)        | 2086(3)    | 41.3(8)   |
| C26A | 9589(3)   | 4260(3)        | 2253(3)    | 40.3(7)   |
| C27A | 8435(3)   | 3971(3)        | 3309(3)    | 34.3(7)   |
| C28A | 7357(3)   | 5038(3)        | 3287(2)    | 27.3(6)   |



**Supplementary Table S16 Anisotropic Displacement Parameters ( $\text{\AA}^2 \times 10^3$ ) for mj24938\_0m. The Anisotropic displacement factor exponent takes the form:  $-2\pi^2[h^2a^{*2}U_{11}+2hka^*b^*U_{12}+\dots]$ .**

| Atom | U <sub>11</sub> | U <sub>22</sub> | U <sub>33</sub> | U <sub>23</sub> | U <sub>13</sub> | U <sub>12</sub> |
|------|-----------------|-----------------|-----------------|-----------------|-----------------|-----------------|
| P1   | 23.2(3)         | 25.8(4)         | 17.1(3)         | -5.3(3)         | -3.2(2)         | 2.9(3)          |
| O1   | 30.0(10)        | 22.5(10)        | 29.8(10)        | -0.5(8)         | -1.8(8)         | 1.3(8)          |
| O2   | 34.5(11)        | 50.3(14)        | 18.5(10)        | -7.8(9)         | 0.4(8)          | -3.1(10)        |
| N1   | 26.3(11)        | 22.4(12)        | 24.3(11)        | -4.9(9)         | -1.9(9)         | 1.1(9)          |
| C1   | 22.7(13)        | 26.7(15)        | 19.4(13)        | -4.7(11)        | -2.7(10)        | 0.9(10)         |
| C2   | 29.6(14)        | 33.2(16)        | 21.8(13)        | -6.4(11)        | -5.5(11)        | 7.5(12)         |
| C3   | 24.7(13)        | 36.8(16)        | 24.0(14)        | -12.3(12)       | -2.8(10)        | 2.1(11)         |
| C4   | 25.0(13)        | 37.1(16)        | 18.0(13)        | -9.7(12)        | -2.4(10)        | -7.7(12)        |
| C5   | 26.3(13)        | 29.3(15)        | 21.0(13)        | -3.0(11)        | -6.3(10)        | -3.7(11)        |
| C6   | 19.9(12)        | 25.9(14)        | 20.6(12)        | -4.6(10)        | -4.7(10)        | -2.4(10)        |
| C7   | 23.3(12)        | 23.7(14)        | 19.1(12)        | -1.4(10)        | -9.3(10)        | -0.7(10)        |
| C8   | 32.2(14)        | 24.9(15)        | 27.3(14)        | -3.7(11)        | -7.0(11)        | 5.1(11)         |
| C9   | 24.9(13)        | 25.9(15)        | 24.8(13)        | -5.6(11)        | -9.5(10)        | 2.4(11)         |
| C10  | 22.6(12)        | 21.9(14)        | 25.6(14)        | -4.4(11)        | -4.3(10)        | -0.3(10)        |
| C11  | 30.6(15)        | 32.8(16)        | 32.6(15)        | -8.1(12)        | -10.4(12)       | 8.9(12)         |
| C12  | 28.0(14)        | 35.9(17)        | 39.0(17)        | -12.6(13)       | -3.0(12)        | 6.3(12)         |
| C13  | 37.7(16)        | 29.7(16)        | 29.1(15)        | -9.4(12)        | -0.7(12)        | -2.1(12)        |
| C14  | 37.6(16)        | 31.7(17)        | 30.4(15)        | -5.8(12)        | -12.2(12)       | 3.9(13)         |
| C15  | 26.3(14)        | 33.1(16)        | 31.5(15)        | -8.2(12)        | -8.5(12)        | 5.4(12)         |
| C16  | 38.3(16)        | 54(2)           | 26.1(15)        | -18.0(14)       | 6.0(12)         | -6.4(14)        |
| C17  | 23.7(12)        | 22.8(14)        | 19.5(12)        | -4.1(10)        | -3.8(10)        | 2.1(10)         |
| C18  | 25.8(13)        | 35.6(17)        | 20.2(13)        | 0.3(11)         | -3.6(10)        | -1.1(11)        |
| C19  | 33.9(15)        | 38.9(17)        | 27.3(15)        | -2.7(13)        | -14.4(12)       | 0.3(13)         |
| C20  | 29.7(14)        | 39.4(17)        | 29.1(15)        | -13.3(13)       | -9.3(12)        | -1.2(12)        |
| C21  | 25.1(13)        | 39.4(17)        | 30.2(15)        | -13.3(13)       | -1.4(11)        | -6.3(12)        |
| C22  | 30.5(14)        | 28.4(15)        | 23.1(14)        | -4.1(12)        | -1.5(11)        | -5.6(12)        |
| C23  | 32.0(15)        | 38.2(18)        | 27.6(15)        | -11.6(13)       | -2.7(12)        | -7.0(12)        |
| C24  | 30.6(15)        | 34.3(17)        | 32.4(16)        | -10.0(13)       | 0.3(12)         | -5.7(12)        |
| C25  | 38.5(17)        | 46(2)           | 52(2)           | -12.3(16)       | 4.4(15)         | -13.2(15)       |
| C26  | 55(2)           | 41(2)           | 66(3)           | -2.3(18)        | -8.5(19)        | -13.4(17)       |
| C27  | 61(2)           | 33.1(19)        | 62(2)           | -17.0(17)       | -8.8(19)        | -4.1(16)        |
| C28  | 42.6(18)        | 37.3(19)        | 43.8(18)        | -11.9(15)       | -3.4(14)        | 3.1(14)         |
| P1A  | 22.8(3)         | 22.3(3)         | 22.3(3)         | -7.6(3)         | -7.2(2)         | 0.2(2)          |
| O1A  | 31.5(10)        | 31.4(12)        | 47.3(13)        | -25.0(10)       | -3.9(9)         | -1.9(8)         |

**Supplementary Table S16 Anisotropic Displacement Parameters ( $\text{\AA}^2 \times 10^3$ ) for mj24938\_0m. The Anisotropic displacement factor exponent takes the form:  $-2\pi^2[h^2a^{*2}U_{11}+2hka^*b^*U_{12}+\dots]$ .**

| Atom | U <sub>11</sub> | U <sub>22</sub> | U <sub>33</sub> | U <sub>23</sub> | U <sub>13</sub> | U <sub>12</sub> |
|------|-----------------|-----------------|-----------------|-----------------|-----------------|-----------------|
| O2A  | 30.6(10)        | 52.9(14)        | 23.1(11)        | -10.8(10)       | -2.1(8)         | -2.8(9)         |
| N1A  | 26.4(12)        | 20.9(12)        | 32.6(13)        | -8.2(10)        | -5.9(9)         | 0.3(9)          |
| C1A  | 21.7(12)        | 26.2(14)        | 24.2(13)        | -8.9(11)        | -8.2(10)        | 6.1(10)         |
| C2A  | 26.0(13)        | 33.1(16)        | 26.7(14)        | -10.5(12)       | -8.8(11)        | -1.3(11)        |
| C3A  | 23.6(13)        | 36.4(17)        | 28.0(14)        | -6.2(12)        | -4.2(11)        | -3.4(11)        |
| C4A  | 24.0(13)        | 38.9(17)        | 22.5(14)        | -9.8(12)        | -5.1(11)        | 7.9(12)         |
| C5A  | 24.5(13)        | 32.1(16)        | 27.8(14)        | -15.0(12)       | -10.1(11)       | 7.5(11)         |
| C6A  | 20.3(12)        | 23.1(14)        | 25.9(13)        | -10.0(11)       | -8.9(10)        | 6.3(10)         |
| C7A  | 26.4(13)        | 21.8(14)        | 24.2(13)        | -8.8(11)        | -12.6(10)       | 5.7(10)         |
| C8A  | 40.9(16)        | 31.0(17)        | 33.9(16)        | -11.1(13)       | -4.8(13)        | -9.6(13)        |
| C9A  | 26.8(14)        | 24.5(15)        | 36.1(15)        | -9.1(12)        | -11.7(12)       | -1.2(11)        |
| C10A | 22.0(13)        | 24.3(14)        | 35.4(15)        | -13.1(12)       | -4.5(11)        | 2.5(10)         |
| C11A | 22.9(13)        | 33.8(17)        | 45.5(18)        | -13.9(14)       | -8.4(12)        | -0.7(12)        |
| C12A | 22.1(14)        | 38.8(18)        | 50.7(19)        | -14.0(15)       | 0.5(13)         | -1.4(12)        |
| C13A | 31.7(15)        | 37.5(18)        | 36.2(16)        | -13.2(14)       | 7.9(12)         | -1.3(13)        |
| C14A | 32.1(16)        | 42.7(19)        | 31.7(16)        | -15.4(14)       | -3.3(12)        | 1.2(13)         |
| C15A | 23.8(13)        | 33.0(16)        | 33.6(15)        | -14.6(13)       | -3.1(11)        | -2.8(11)        |
| C16A | 48(2)           | 69(3)           | 27.4(16)        | -3.6(16)        | -1.9(14)        | -18.3(18)       |
| C17A | 26.9(13)        | 22.9(14)        | 23.4(13)        | -5.7(11)        | -8.7(10)        | -0.5(10)        |
| C18A | 32.0(15)        | 42.2(18)        | 21.9(14)        | -6.4(12)        | -8.4(11)        | 0.2(12)         |
| C19A | 45.0(18)        | 55(2)           | 25.1(15)        | -8.6(14)        | -15.0(13)       | -5.6(15)        |
| C20A | 37.5(16)        | 46.2(19)        | 32.0(16)        | 7.6(14)         | -18.3(13)       | -10.6(14)       |
| C21A | 27.2(14)        | 28.0(15)        | 37.7(17)        | -2.4(13)        | -13.5(12)       | -0.8(11)        |
| C22A | 28.5(14)        | 28.3(15)        | 34.9(15)        | -10.6(12)       | -10.2(12)       | 1.0(11)         |
| C23A | 24.3(13)        | 25.2(14)        | 26.8(13)        | -9.5(11)        | -8.1(10)        | 0.3(10)         |
| C24A | 27.7(14)        | 31.4(16)        | 38.6(16)        | -13.9(13)       | -0.1(12)        | -2.2(12)        |
| C25A | 26.8(15)        | 43(2)           | 57(2)           | -24.0(16)       | -3.1(14)        | 3.6(13)         |
| C26A | 35.9(16)        | 38.0(18)        | 56(2)           | -25.8(16)       | -13.8(14)       | 10.4(13)        |
| C27A | 41.6(16)        | 27.1(16)        | 42.0(17)        | -14.8(13)       | -19.0(14)       | 5.6(12)         |
| C28A | 28.5(14)        | 26.4(15)        | 28.7(14)        | -9.4(11)        | -6.8(11)        | -0.6(11)        |

**Supplementary Table S17 Bond Lengths for mj24938\_0m.**

| Atom | Atom | Length/ $\text{\AA}$ | Atom | Atom | Length/ $\text{\AA}$ |
|------|------|----------------------|------|------|----------------------|
| P1   | C1   | 1.845(3)             | P1A  | C1A  | 1.846(3)             |

**Supplementary Table S17 Bond Lengths for mj24938\_0m.**

| Atom | Atom | Length/Å | Atom | Atom | Length/Å |
|------|------|----------|------|------|----------|
| P1   | C17  | 1.864(3) | P1A  | C17A | 1.862(3) |
| P1   | C23  | 1.863(3) | P1A  | C23A | 1.877(3) |
| O1   | C7   | 1.369(3) | O1A  | C7A  | 1.363(3) |
| O1   | C8   | 1.450(3) | O1A  | C8A  | 1.447(3) |
| O2   | C4   | 1.367(3) | O2A  | C4A  | 1.372(3) |
| O2   | C16  | 1.435(4) | O2A  | C16A | 1.438(4) |
| N1   | C7   | 1.276(3) | N1A  | C7A  | 1.264(4) |
| N1   | C9   | 1.485(3) | N1A  | C9A  | 1.485(3) |
| C1   | C2   | 1.405(4) | C1A  | C2A  | 1.399(4) |
| C1   | C6   | 1.410(4) | C1A  | C6A  | 1.413(4) |
| C2   | C3   | 1.391(4) | C2A  | C3A  | 1.395(4) |
| C3   | C4   | 1.387(4) | C3A  | C4A  | 1.388(4) |
| C4   | C5   | 1.394(4) | C4A  | C5A  | 1.392(4) |
| C5   | C6   | 1.394(4) | C5A  | C6A  | 1.392(4) |
| C6   | C7   | 1.478(4) | C6A  | C7A  | 1.485(4) |
| C8   | C9   | 1.542(4) | C8A  | C9A  | 1.543(4) |
| C9   | C10  | 1.508(4) | C9A  | C10A | 1.515(4) |
| C10  | C11  | 1.389(4) | C10A | C11A | 1.392(4) |
| C10  | C15  | 1.393(4) | C10A | C15A | 1.397(4) |
| C11  | C12  | 1.387(4) | C11A | C12A | 1.381(5) |
| C12  | C13  | 1.380(4) | C12A | C13A | 1.387(5) |
| C13  | C14  | 1.387(4) | C13A | C14A | 1.386(4) |
| C14  | C15  | 1.386(4) | C14A | C15A | 1.382(4) |
| C17  | C18  | 1.536(3) | C17A | C18A | 1.546(4) |
| C17  | C22  | 1.541(3) | C17A | C22A | 1.533(4) |
| C18  | C19  | 1.530(4) | C18A | C19A | 1.533(4) |
| C19  | C20  | 1.520(4) | C19A | C20A | 1.519(5) |
| C20  | C21  | 1.525(4) | C20A | C21A | 1.520(4) |
| C21  | C22  | 1.528(4) | C21A | C22A | 1.540(4) |
| C23  | C24  | 1.527(4) | C23A | C24A | 1.533(4) |
| C23  | C28  | 1.509(5) | C23A | C28A | 1.535(4) |
| C24  | C25  | 1.530(4) | C24A | C25A | 1.533(4) |
| C25  | C26  | 1.491(6) | C25A | C26A | 1.522(5) |
| C26  | C27  | 1.534(5) | C26A | C27A | 1.518(5) |
| C27  | C28  | 1.536(5) | C27A | C28A | 1.530(4) |

**Supplementary Table S18 Bond Angles for mj24938\_0m.**

| Atom | Atom | Atom | Angle/°    | Atom | Atom | Atom | Angle/°    |
|------|------|------|------------|------|------|------|------------|
| C1   | P1   | C17  | 101.40(12) | C1A  | P1A  | C17A | 102.69(12) |
| C1   | P1   | C23  | 100.47(12) | C1A  | P1A  | C23A | 98.83(12)  |
| C23  | P1   | C17  | 106.88(13) | C17A | P1A  | C23A | 104.57(12) |
| C7   | O1   | C8   | 105.3(2)   | C7A  | O1A  | C8A  | 105.8(2)   |
| C4   | O2   | C16  | 116.4(2)   | C4A  | O2A  | C16A | 117.1(2)   |
| C7   | N1   | C9   | 106.7(2)   | C7A  | N1A  | C9A  | 107.0(2)   |
| C2   | C1   | P1   | 122.3(2)   | C2A  | C1A  | P1A  | 123.2(2)   |
| C2   | C1   | C6   | 116.7(2)   | C2A  | C1A  | C6A  | 116.1(2)   |
| C6   | C1   | P1   | 120.7(2)   | C6A  | C1A  | P1A  | 120.7(2)   |
| C3   | C2   | C1   | 122.4(3)   | C3A  | C2A  | C1A  | 123.4(2)   |
| C4   | C3   | C2   | 119.5(3)   | C4A  | C3A  | C2A  | 118.8(3)   |
| O2   | C4   | C3   | 124.5(3)   | O2A  | C4A  | C3A  | 124.8(3)   |
| O2   | C4   | C5   | 115.8(3)   | O2A  | C4A  | C5A  | 115.4(2)   |
| C3   | C4   | C5   | 119.7(2)   | C3A  | C4A  | C5A  | 119.8(2)   |
| C4   | C5   | C6   | 120.4(2)   | C4A  | C5A  | C6A  | 120.5(2)   |
| C1   | C6   | C7   | 120.9(2)   | C1A  | C6A  | C7A  | 121.8(2)   |
| C5   | C6   | C1   | 121.1(2)   | C5A  | C6A  | C1A  | 121.3(2)   |
| C5   | C6   | C7   | 118.0(2)   | C5A  | C6A  | C7A  | 116.7(2)   |
| O1   | C7   | C6   | 115.2(2)   | O1A  | C7A  | C6A  | 115.0(2)   |
| N1   | C7   | O1   | 118.3(2)   | N1A  | C7A  | O1A  | 118.8(2)   |
| N1   | C7   | C6   | 126.5(2)   | N1A  | C7A  | C6A  | 126.1(2)   |
| O1   | C8   | C9   | 104.2(2)   | O1A  | C8A  | C9A  | 104.6(2)   |
| N1   | C9   | C8   | 103.7(2)   | N1A  | C9A  | C8A  | 103.7(2)   |
| N1   | C9   | C10  | 113.4(2)   | N1A  | C9A  | C10A | 112.7(2)   |
| C10  | C9   | C8   | 114.3(2)   | C10A | C9A  | C8A  | 113.7(2)   |
| C11  | C10  | C9   | 119.5(2)   | C11A | C10A | C9A  | 120.1(2)   |
| C11  | C10  | C15  | 118.6(3)   | C11A | C10A | C15A | 118.6(3)   |
| C15  | C10  | C9   | 121.9(2)   | C15A | C10A | C9A  | 121.3(2)   |
| C12  | C11  | C10  | 120.9(3)   | C12A | C11A | C10A | 120.8(3)   |
| C13  | C12  | C11  | 120.2(3)   | C11A | C12A | C13A | 120.2(3)   |
| C12  | C13  | C14  | 119.6(3)   | C14A | C13A | C12A | 119.5(3)   |
| C15  | C14  | C13  | 120.3(3)   | C15A | C14A | C13A | 120.4(3)   |
| C14  | C15  | C10  | 120.5(3)   | C14A | C15A | C10A | 120.4(3)   |
| C18  | C17  | P1   | 108.35(17) | C18A | C17A | P1A  | 108.77(17) |
| C18  | C17  | C22  | 109.5(2)   | C22A | C17A | P1A  | 110.79(18) |
| C22  | C17  | P1   | 110.23(18) | C22A | C17A | C18A | 109.4(2)   |
| C19  | C18  | C17  | 112.8(2)   | C19A | C18A | C17A | 111.8(2)   |
| C20  | C19  | C18  | 111.2(2)   | C20A | C19A | C18A | 111.3(3)   |

**Supplementary Table S18 Bond Angles for mj24938\_0m.**

| Atom | Atom | Atom | Angle/°  | Atom | Atom | Atom | Angle/°    |
|------|------|------|----------|------|------|------|------------|
| C19  | C20  | C21  | 109.5(2) | C19A | C20A | C21A | 111.0(2)   |
| C20  | C21  | C22  | 110.8(2) | C20A | C21A | C22A | 111.4(2)   |
| C21  | C22  | C17  | 111.4(2) | C17A | C22A | C21A | 110.9(2)   |
| C24  | C23  | P1   | 112.2(2) | C24A | C23A | P1A  | 112.8(2)   |
| C28  | C23  | P1   | 116.9(2) | C24A | C23A | C28A | 111.3(2)   |
| C28  | C23  | C24  | 111.7(3) | C28A | C23A | P1A  | 115.34(18) |
| C23  | C24  | C25  | 112.2(3) | C25A | C24A | C23A | 111.1(3)   |
| C26  | C25  | C24  | 111.6(3) | C26A | C25A | C24A | 112.0(2)   |
| C25  | C26  | C27  | 110.9(3) | C27A | C26A | C25A | 110.7(3)   |
| C26  | C27  | C28  | 109.9(3) | C26A | C27A | C28A | 111.4(3)   |
| C23  | C28  | C27  | 111.4(3) | C27A | C28A | C23A | 111.2(2)   |

**Supplementary Table S19 Torsion Angles for mj24938\_0m.**

| A  | B   | C   | D   | Angle/°     | A   | B    | C    | D    | Angle/°     |
|----|-----|-----|-----|-------------|-----|------|------|------|-------------|
| P1 | C1  | C2  | C3  | -171.1(2)   | P1A | C1A  | C2A  | C3A  | -178.9(2)   |
| P1 | C1  | C6  | C5  | 169.3(2)    | P1A | C1A  | C6A  | C5A  | 175.5(2)    |
| P1 | C1  | C6  | C7  | -10.7(3)    | P1A | C1A  | C6A  | C7A  | -9.5(3)     |
| P1 | C17 | C18 | C19 | -173.4(2)   | P1A | C17A | C18A | C19A | -177.0(2)   |
| P1 | C17 | C22 | C21 | 173.67(19)  | P1A | C17A | C22A | C21A | 176.2(2)    |
| P1 | C23 | C24 | C25 | 174.5(2)    | P1A | C23A | C24A | C25A | 174.77(19)  |
| P1 | C23 | C28 | C27 | -174.9(2)   | P1A | C23A | C28A | C27A | -175.22(19) |
| O1 | C8  | C9  | N1  | 12.5(3)     | O1A | C8A  | C9A  | N1A  | -0.2(3)     |
| O1 | C8  | C9  | C10 | 136.6(2)    | O1A | C8A  | C9A  | C10A | 122.5(2)    |
| O2 | C4  | C5  | C6  | -178.8(2)   | O2A | C4A  | C5A  | C6A  | 177.5(2)    |
| N1 | C9  | C10 | C11 | -150.0(2)   | N1A | C9A  | C10A | C11A | -153.1(3)   |
| N1 | C9  | C10 | C15 | 30.9(3)     | N1A | C9A  | C10A | C15A | 27.3(4)     |
| C1 | P1  | C17 | C18 | -178.67(19) | C1A | P1A  | C17A | C18A | -173.63(19) |
| C1 | P1  | C17 | C22 | 61.6(2)     | C1A | P1A  | C17A | C22A | 66.1(2)     |
| C1 | P1  | C23 | C24 | -163.2(2)   | C1A | P1A  | C23A | C24A | -158.2(2)   |
| C1 | P1  | C23 | C28 | 65.8(3)     | C1A | P1A  | C23A | C28A | 72.3(2)     |
| C1 | C2  | C3  | C4  | 1.4(4)      | C1A | C2A  | C3A  | C4A  | 2.8(4)      |
| C1 | C6  | C7  | O1  | 137.8(2)    | C1A | C6A  | C7A  | O1A  | 142.6(2)    |
| C1 | C6  | C7  | N1  | -43.6(4)    | C1A | C6A  | C7A  | N1A  | -40.5(4)    |
| C2 | C1  | C6  | C5  | -4.7(4)     | C2A | C1A  | C6A  | C5A  | -2.6(4)     |
| C2 | C1  | C6  | C7  | 175.3(2)    | C2A | C1A  | C6A  | C7A  | 172.5(2)    |
| C2 | C3  | C4  | O2  | 177.0(3)    | C2A | C3A  | C4A  | O2A  | 179.2(3)    |

**Supplementary Table S19 Torsion Angles for mj24938\_0m.**

| A   | B   | C   | D   | Angle/°   | A    | B    | C    | D    | Angle/°   |
|-----|-----|-----|-----|-----------|------|------|------|------|-----------|
| C2  | C3  | C4  | C5  | -3.9(4)   | C2A  | C3A  | C4A  | C5A  | -1.3(4)   |
| C3  | C4  | C5  | C6  | 2.0(4)    | C3A  | C4A  | C5A  | C6A  | -2.0(4)   |
| C4  | C5  | C6  | C1  | 2.4(4)    | C4A  | C5A  | C6A  | C1A  | 4.1(4)    |
| C4  | C5  | C6  | C7  | -177.6(2) | C4A  | C5A  | C6A  | C7A  | -171.2(2) |
| C5  | C6  | C7  | O1  | -42.2(3)  | C5A  | C6A  | C7A  | O1A  | -42.1(3)  |
| C5  | C6  | C7  | N1  | 136.4(3)  | C5A  | C6A  | C7A  | N1A  | 134.8(3)  |
| C6  | C1  | C2  | C3  | 2.8(4)    | C6A  | C1A  | C2A  | C3A  | -0.8(4)   |
| C7  | O1  | C8  | C9  | -12.1(3)  | C7A  | O1A  | C8A  | C9A  | 0.1(3)    |
| C7  | N1  | C9  | C8  | -8.5(3)   | C7A  | N1A  | C9A  | C8A  | 0.3(3)    |
| C7  | N1  | C9  | C10 | -133.1(2) | C7A  | N1A  | C9A  | C10A | -123.0(3) |
| C8  | O1  | C7  | N1  | 7.7(3)    | C8A  | O1A  | C7A  | N1A  | 0.2(3)    |
| C8  | O1  | C7  | C6  | -173.6(2) | C8A  | O1A  | C7A  | C6A  | 177.3(2)  |
| C8  | C9  | C10 | C11 | 91.3(3)   | C8A  | C9A  | C10A | C11A | 89.2(3)   |
| C8  | C9  | C10 | C15 | -87.8(3)  | C8A  | C9A  | C10A | C15A | -90.4(3)  |
| C9  | N1  | C7  | O1  | 0.9(3)    | C9A  | N1A  | C7A  | O1A  | -0.3(3)   |
| C9  | N1  | C7  | C6  | -177.7(2) | C9A  | N1A  | C7A  | C6A  | -177.1(2) |
| C9  | C10 | C11 | C12 | -179.0(3) | C9A  | C10A | C11A | C12A | -179.7(3) |
| C9  | C10 | C15 | C14 | 179.5(3)  | C9A  | C10A | C15A | C14A | 179.4(3)  |
| C10 | C11 | C12 | C13 | -0.2(5)   | C10A | C11A | C12A | C13A | 0.1(5)    |
| C11 | C10 | C15 | C14 | 0.4(4)    | C11A | C10A | C15A | C14A | -0.3(4)   |
| C11 | C12 | C13 | C14 | -0.2(5)   | C11A | C12A | C13A | C14A | 0.1(5)    |
| C12 | C13 | C14 | C15 | 0.7(5)    | C12A | C13A | C14A | C15A | -0.4(5)   |
| C13 | C14 | C15 | C10 | -0.8(4)   | C13A | C14A | C15A | C10A | 0.5(5)    |
| C15 | C10 | C11 | C12 | 0.1(4)    | C15A | C10A | C11A | C12A | 0.0(4)    |
| C16 | O2  | C4  | C3  | -2.5(4)   | C16A | O2A  | C4A  | C3A  | 11.3(4)   |
| C16 | O2  | C4  | C5  | 178.4(2)  | C16A | O2A  | C4A  | C5A  | -168.2(3) |
| C17 | P1  | C1  | C2  | 26.2(3)   | C17A | P1A  | C1A  | C2A  | 22.5(3)   |
| C17 | P1  | C1  | C6  | -147.5(2) | C17A | P1A  | C1A  | C6A  | -155.4(2) |
| C17 | P1  | C23 | C24 | 91.3(2)   | C17A | P1A  | C23A | C24A | 96.1(2)   |
| C17 | P1  | C23 | C28 | -39.6(3)  | C17A | P1A  | C23A | C28A | -33.4(2)  |
| C17 | C18 | C19 | C20 | 55.6(3)   | C17A | C18A | C19A | C20A | 55.7(3)   |
| C18 | C17 | C22 | C21 | 54.6(3)   | C18A | C17A | C22A | C21A | 56.3(3)   |
| C18 | C19 | C20 | C21 | -57.2(3)  | C18A | C19A | C20A | C21A | -55.2(3)  |
| C19 | C20 | C21 | C22 | 59.2(3)   | C19A | C20A | C21A | C22A | 56.2(3)   |
| C20 | C21 | C22 | C17 | -58.8(3)  | C20A | C21A | C22A | C17A | -57.4(3)  |
| C22 | C17 | C18 | C19 | -53.2(3)  | C22A | C17A | C18A | C19A | -55.9(3)  |
| C23 | P1  | C1  | C2  | -83.6(2)  | C23A | P1A  | C1A  | C2A  | -84.7(2)  |
| C23 | P1  | C1  | C6  | 102.8(2)  | C23A | P1A  | C1A  | C6A  | 97.4(2)   |

**Supplementary Table S19 Torsion Angles for mj24938\_0m.**

| A   | B   | C   | D   | Angle/°    | A    | B    | C    | D    | Angle/°    |
|-----|-----|-----|-----|------------|------|------|------|------|------------|
| C23 | P1  | C17 | C18 | -73.9(2)   | C23A | P1A  | C17A | C18A | -70.8(2)   |
| C23 | P1  | C17 | C22 | 166.32(18) | C23A | P1A  | C17A | C22A | 168.87(19) |
| C23 | C24 | C25 | C26 | 53.6(4)    | C23A | C24A | C25A | C26A | 54.8(4)    |
| C24 | C23 | C28 | C27 | 53.9(4)    | C24A | C23A | C28A | C27A | 54.5(3)    |
| C24 | C25 | C26 | C27 | -56.7(4)   | C24A | C25A | C26A | C27A | -56.1(4)   |
| C25 | C26 | C27 | C28 | 58.2(4)    | C25A | C26A | C27A | C28A | 56.5(3)    |
| C26 | C27 | C28 | C23 | -56.7(4)   | C26A | C27A | C28A | C23A | -56.1(3)   |
| C28 | C23 | C24 | C25 | -51.9(4)   | C28A | C23A | C24A | C25A | -53.7(3)   |

**Supplementary Table S20 Hydrogen Atom Coordinates ( $\text{\AA} \times 10^4$ ) and Isotropic Displacement Parameters ( $\text{\AA}^2 \times 10^3$ ) for mj24938\_0m.**

| Atom | x        | y       | z       | U(eq) |
|------|----------|---------|---------|-------|
| H2   | 5117.33  | 736.51  | 5327.02 | 34    |
| H3   | 6010.57  | 1116.85 | 3405.19 | 34    |
| H5   | 3474.43  | 4176.62 | 2947.07 | 31    |
| H8A  | 594.58   | 6530.38 | 4607.19 | 34    |
| H8B  | 1381.44  | 6430.11 | 5607.59 | 34    |
| H9   | -691.1   | 4703.04 | 5463.48 | 30    |
| H11  | -2251.68 | 5753.48 | 6721.96 | 38    |
| H12  | -3196.33 | 5940.54 | 8547.21 | 41    |
| H13  | -2022.02 | 5140.84 | 9954.34 | 39    |
| H14  | 99.52    | 4133.59 | 9528.24 | 39    |
| H15  | 1064.46  | 3972.21 | 7699.32 | 36    |
| H16A | 6773.46  | 2649.88 | 590.96  | 60    |
| H16B | 6191.26  | 1393.6  | 1574.79 | 60    |
| H16C | 7290.25  | 2400.12 | 1731.31 | 60    |
| H17  | 5029.44  | 575.74  | 7088.33 | 27    |
| H18A | 4143.79  | 2021.92 | 8805.88 | 34    |
| H18B | 3781.54  | 502.6   | 8930.87 | 34    |
| H19A | 5571.95  | 759.33  | 9861.11 | 40    |
| H19B | 6105.6   | -32.34  | 8904.74 | 40    |
| H20A | 7815.95  | 1571.51 | 8777.9  | 38    |
| H20B | 6708.01  | 2704.62 | 8676.03 | 38    |
| H21A | 7610.68  | 1153.39 | 7046.9  | 38    |
| H21B | 8071.14  | 2662.51 | 6869.54 | 38    |
| H22A | 6258.3   | 2512.72 | 5948.56 | 34    |

**Supplementary Table S20 Hydrogen Atom Coordinates ( $\text{\AA} \times 10^4$ ) and Isotropic Displacement Parameters ( $\text{\AA}^2 \times 10^3$ ) for mj24938\_0m.**

| Atom | x        | y        | z       | U(eq) |
|------|----------|----------|---------|-------|
| H22B | 5750.91  | 3295.59  | 6914.45 | 34    |
| H23  | 1290.09  | 889.25   | 6721.28 | 39    |
| H24A | 544      | 1403.75  | 8446.58 | 40    |
| H24B | 1546.21  | 356.03   | 8974.66 | 40    |
| H25A | -689.25  | -614.21  | 9472.74 | 57    |
| H25B | -818.12  | -262.59  | 8197.5  | 57    |
| H26A | -342.89  | -2471.21 | 8700.22 | 68    |
| H26B | 1011.39  | -2111.76 | 9084.28 | 68    |
| H27A | 699.11   | -1446.79 | 6810.6  | 62    |
| H27B | 1691.81  | -2556.23 | 7275.71 | 62    |
| H28A | 3115.86  | -949.69  | 7590.98 | 50    |
| H28B | 3009.38  | -564.69  | 6310.48 | 50    |
| H2A  | 4566.34  | 6034.38  | 4758.4  | 33    |
| H3A  | 3624.36  | 5528.69  | 6679.64 | 36    |
| H5A  | 6262.17  | 8257.14  | 7013.96 | 31    |
| H8AA | 9628.21  | 10645.82 | 5606.55 | 42    |
| H8AB | 9083.42  | 11493.2  | 4561.44 | 42    |
| H9A  | 10766.22 | 9351.79  | 4559.33 | 34    |
| H11A | 12364.47 | 11049.7  | 3240.81 | 40    |
| H12A | 13213.76 | 12182.31 | 1400.74 | 46    |
| H13A | 11872.35 | 12281.46 | 80.8    | 44    |
| H14A | 9668.43  | 11245.98 | 624.16  | 42    |
| H15A | 8819.2   | 10094.76 | 2460.99 | 35    |
| H16D | 2557.07  | 5676.92  | 8482.1  | 75    |
| H16E | 3251.71  | 5462.67  | 9534.13 | 75    |
| H16F | 3861.09  | 4757.21  | 8533.2  | 75    |
| H17A | 5051.57  | 6386.93  | 2969.9  | 29    |
| H18C | 6278.65  | 8362.73  | 985.07  | 38    |
| H18D | 6657.26  | 6845.7   | 1199.64 | 38    |
| H19C | 5108.76  | 7315.54  | -31.96  | 49    |
| H19D | 4430.05  | 6230.66  | 1073.25 | 49    |
| H20C | 2756.4   | 7774.29  | 707.17  | 47    |
| H20D | 3793.09  | 8955.86  | 661.27  | 47    |
| H21C | 2603.36  | 6988.5   | 2628.8  | 37    |
| H21D | 2205.75  | 8501.13  | 2407.27 | 37    |
| H22D | 4452.81  | 9141.23  | 2513.07 | 35    |
| H22C | 3759.25  | 8090.38  | 3637.46 | 35    |



**Supplementary Table S20 Hydrogen Atom Coordinates ( $\text{\AA} \times 10^4$ ) and Isotropic Displacement Parameters ( $\text{\AA}^2 \times 10^3$ ) for mj24938\_0m.**

| Atom | x        | y       | z       | U(eq) |
|------|----------|---------|---------|-------|
| H23A | 8491.34  | 6339.88 | 3752.64 | 29    |
| H24C | 8843.03  | 6786.07 | 1389.12 | 39    |
| H24D | 9703.82  | 7541.1  | 2008.82 | 39    |
| H25C | 10994.04 | 5788.94 | 1374.59 | 50    |
| H25D | 10749.14 | 5592.9  | 2701.08 | 50    |
| H26D | 9201.6   | 4236.12 | 1600.06 | 48    |
| H26C | 10291.3  | 3577.07 | 2307    | 48    |
| H27C | 8837.62  | 3912.32 | 3967.03 | 41    |
| H27D | 7973.37  | 3112.1  | 3383.24 | 41    |
| H28D | 6647.15  | 4845.62 | 4001.9  | 33    |
| H28C | 6883.83  | 5034.6  | 2675.74 | 33    |

### 9.3 X-Ray Crystallographic Analysis of (L4)NiCl<sub>2</sub> (A)

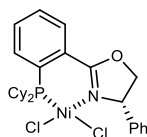

CCDC: 2288083

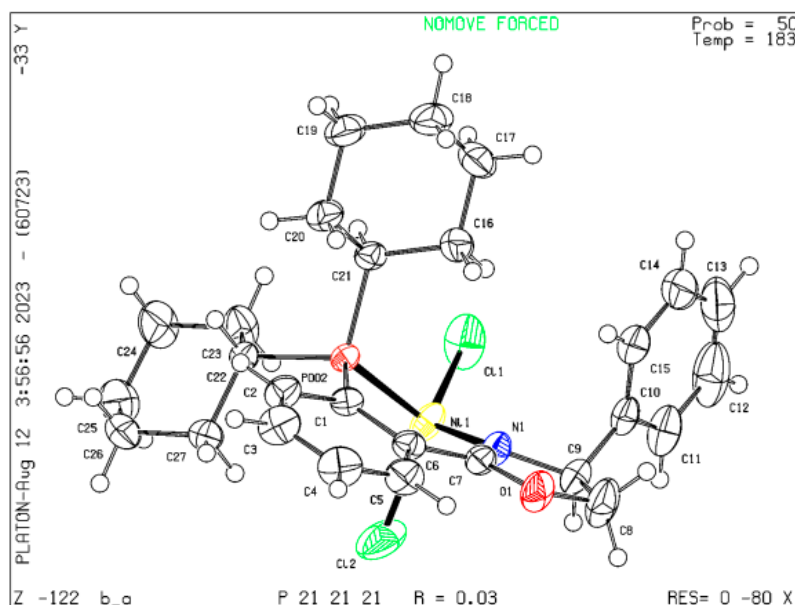

**Supplementary Figure S12 X-ray structure of (L4)NiCl<sub>2</sub> (A)**

**Supplementary Table S21 Crystal data and structure refinement for B\_a.**

|                                             |                                                                |
|---------------------------------------------|----------------------------------------------------------------|
| Identification code                         | B_a                                                            |
| Empirical formula                           | C <sub>27</sub> H <sub>34</sub> Cl <sub>2</sub> NNiOP          |
| Formula weight                              | 549.13                                                         |
| Temperature/K                               | 183.00                                                         |
| Crystal system                              | orthorhombic                                                   |
| Space group                                 | P2 <sub>1</sub> 2 <sub>1</sub> 2 <sub>1</sub>                  |
| a/Å                                         | 8.8147(5)                                                      |
| b/Å                                         | 15.3503(9)                                                     |
| c/Å                                         | 19.9299(12)                                                    |
| $\alpha$ /°                                 | 90                                                             |
| $\beta$ /°                                  | 90                                                             |
| $\gamma$ /°                                 | 90                                                             |
| Volume/Å <sup>3</sup>                       | 2696.7(3)                                                      |
| Z                                           | 4                                                              |
| $\rho_{\text{calc}}$ /g/cm <sup>3</sup>     | 1.353                                                          |
| $\mu$ /mm <sup>-1</sup>                     | 3.567                                                          |
| F(000)                                      | 1152.0                                                         |
| Crystal size/mm <sup>3</sup>                | 0.12 × 0.08 × 0.08                                             |
| Radiation                                   | CuK $\alpha$ ( $\lambda$ = 1.54178)                            |
| 2 $\theta$ range for data collection/°      | 7.268 to 136.522                                               |
| Index ranges                                | -10 ≤ h ≤ 10, -18 ≤ k ≤ 14, -23 ≤ l ≤ 24                       |
| Reflections collected                       | 17441                                                          |
| Independent reflections                     | 4818 [ $R_{\text{int}}$ = 0.0273, $R_{\text{sigma}}$ = 0.0318] |
| Data/restraints/parameters                  | 4818/0/299                                                     |
| Goodness-of-fit on F <sup>2</sup>           | 1.066                                                          |
| Final R indexes [ $I \geq 2\sigma(I)$ ]     | $R_1$ = 0.0284, $wR_2$ = 0.0731                                |
| Final R indexes [all data]                  | $R_1$ = 0.0285, $wR_2$ = 0.0732                                |
| Largest diff. peak/hole / e Å <sup>-3</sup> | 0.55/-0.48                                                     |
| Flack parameter                             | 0.042(19)                                                      |

**Supplementary Table S22 Fractional Atomic Coordinates ( $\times 10^4$ ) and Equivalent Isotropic Displacement Parameters ( $\text{\AA}^2 \times 10^3$ ) for B\_a.  $U_{\text{eq}}$  is defined as 1/3 of the trace of the orthogonalised  $U_{\text{IJ}}$  tensor.**

| Atom | <i>x</i>   | <i>y</i>   | <i>z</i>   | $U(\text{eq})$ |
|------|------------|------------|------------|----------------|
| Ni1  | 3859.0(6)  | 4593.0(3)  | 3233.6(3)  | 37.84(15)      |
| P002 | 4664.0(7)  | 5982.7(4)  | 3103.7(3)  | 24.69(14)      |
| Cl1  | 5626.4(11) | 3896.7(6)  | 3795.1(5)  | 63.5(3)        |
| Cl2  | 2839.7(12) | 4135.6(8)  | 2273.9(6)  | 75.2(3)        |
| O1   | -224(2)    | 5660.4(16) | 3887.4(12) | 46.2(5)        |
| N1   | 1949(3)    | 4968.4(16) | 3680.5(12) | 33.8(5)        |
| C21  | 5733(3)    | 6405.1(18) | 3831.4(14) | 29.2(5)        |
| C6   | 1556(3)    | 6475.6(18) | 3246.6(14) | 30.1(5)        |
| C27  | 5063(3)    | 6103(2)    | 1706.8(15) | 42.5(7)        |
| C1   | 3013(3)    | 6694.9(17) | 3011.8(13) | 28.2(5)        |
| C9   | 1024(4)    | 4323(2)    | 4060.5(16) | 40.5(7)        |
| C7   | 1172(3)    | 5663.6(19) | 3605.5(14) | 32.2(6)        |
| C22  | 5904(3)    | 6184.0(18) | 2376.2(13) | 29.6(5)        |
| C5   | 360(3)     | 7060(2)    | 3144.8(16) | 41.7(7)        |
| C16  | 4998(3)    | 6144(2)    | 4496.2(14) | 38.6(7)        |
| C23  | 7220(4)    | 5538(3)    | 2397.8(16) | 47.7(8)        |
| C10  | 1835(3)    | 3990(2)    | 4672.7(15) | 37.1(6)        |
| C11  | 2003(4)    | 3105(2)    | 4779(2)    | 54.0(9)        |
| C20  | 6030(4)    | 7386(2)    | 3810.5(16) | 41.0(7)        |
| C4   | 579(4)     | 7838(2)    | 2812.2(18) | 48.0(8)        |
| C3   | 1993(4)    | 8047(2)    | 2576.3(19) | 46.9(8)        |
| C26  | 6151(5)    | 6253(3)    | 1121.2(16) | 57.1(9)        |
| C15  | 2395(4)    | 4566(3)    | 5149.6(17) | 49.1(8)        |
| C2   | 3201(3)    | 7484.9(19) | 2679.8(16) | 37.4(6)        |
| C8   | -427(4)    | 4832(3)    | 4212(2)    | 61.3(11)       |
| C13  | 3292(5)    | 3382(5)    | 5808(3)    | 83.7(17)       |
| C24  | 8304(4)    | 5680(3)    | 1807.1(19) | 62.6(10)       |

**Supplementary Table S22 Fractional Atomic Coordinates ( $\times 10^4$ ) and Equivalent Isotropic Displacement Parameters ( $\text{\AA}^2 \times 10^3$ ) for B\_a.  $U_{\text{eq}}$  is defined as 1/3 of the trace of the orthogonalised  $U_{\text{IJ}}$  tensor.**

| Atom | <i>x</i> | <i>y</i> | <i>z</i>   | $U(\text{eq})$ |
|------|----------|----------|------------|----------------|
| C19  | 7011(4)  | 7665(3)  | 4401.1(18) | 54.3(9)        |
| C17  | 5964(4)  | 6442(3)  | 5088.3(16) | 55.4(9)        |
| C25  | 7475(5)  | 5629(3)  | 1142.1(19) | 66.5(11)       |
| C18  | 6295(5)  | 7403(3)  | 5064.0(18) | 61.0(11)       |
| C14  | 3130(5)  | 4255(4)  | 5713(2)    | 72.0(14)       |
| C12  | 2735(6)  | 2806(4)  | 5354(3)    | 81.3(16)       |

**Supplementary Table S23 Anisotropic Displacement Parameters ( $\text{\AA}^2 \times 10^3$ ) for B\_a. The Anisotropic displacement factor exponent takes the form:  $-2\pi^2[\text{h}^2\text{a}^{*2}U_{11}+2\text{hka}^*\text{b}^*U_{12}+\dots]$ .**

| Atom | $U_{11}$ | $U_{22}$ | $U_{33}$ | $U_{23}$ | $U_{13}$ | $U_{12}$  |
|------|----------|----------|----------|----------|----------|-----------|
| Ni1  | 30.9(2)  | 24.7(2)  | 57.9(3)  | -2.2(2)  | 11.2(2)  | -1.52(19) |
| P002 | 20.2(3)  | 24.8(3)  | 29.1(3)  | -0.8(2)  | 0.7(2)   | 0.1(2)    |
| Cl1  | 57.0(5)  | 53.7(5)  | 79.7(6)  | 23.9(5)  | 13.9(5)  | 21.1(4)   |
| Cl2  | 66.4(6)  | 79.3(7)  | 79.9(7)  | -42.9(6) | 16.7(5)  | -36.7(5)  |
| O1   | 21.7(9)  | 63.9(14) | 52.9(13) | 12.6(11) | 8.8(9)   | 4.1(9)    |
| N1   | 27.4(11) | 36.0(12) | 38.1(13) | 3.7(10)  | 5.2(10)  | -2.7(10)  |
| C21  | 20.3(12) | 36.2(14) | 31.0(13) | -3.2(11) | -0.9(10) | 2.0(10)   |
| C6   | 25.1(12) | 35.1(13) | 30.1(13) | -3.4(11) | -1.7(10) | 3.3(10)   |
| C27  | 36.3(15) | 58.7(19) | 32.4(14) | -3.6(14) | -1.5(12) | -7.4(14)  |
| C1   | 25.6(12) | 26.6(12) | 32.4(13) | -3.1(10) | -2.6(10) | 1.7(10)   |
| C9   | 33.2(14) | 44.1(16) | 44.1(16) | 5.5(13)  | 4.7(13)  | -11.1(13) |
| C7   | 20.3(12) | 45.0(15) | 31.2(13) | -0.5(11) | 1.0(10)  | -0.8(11)  |
| C22  | 26.4(13) | 34.1(13) | 28.4(13) | -0.6(10) | 1.2(10)  | -2.8(11)  |
| C5   | 27.8(13) | 51.5(17) | 45.8(16) | -1.4(14) | -0.4(14) | 10.9(13)  |
| C16  | 35.1(15) | 46.7(17) | 33.9(14) | -0.9(12) | 1.1(11)  | -1.7(13)  |

**Supplementary Table S23 Anisotropic Displacement Parameters ( $\text{\AA}^2 \times 10^3$ ) for B\_a. The Anisotropic displacement factor exponent takes the form:  $-2\pi^2[h^2a^{*2}U_{11}+2hka^*b^*U_{12}+\dots]$ .**

| Atom | U <sub>11</sub> | U <sub>22</sub> | U <sub>33</sub> | U <sub>23</sub> | U <sub>13</sub> | U <sub>12</sub> |
|------|-----------------|-----------------|-----------------|-----------------|-----------------|-----------------|
| C23  | 39.7(17)        | 63(2)           | 40.8(16)        | 5.6(15)         | 11.2(14)        | 14.8(16)        |
| C10  | 28.2(13)        | 40.1(16)        | 43.1(15)        | 6.8(13)         | 11.7(12)        | -2.1(12)        |
| C11  | 49.3(19)        | 46.2(19)        | 66(2)           | 11.1(17)        | 23.0(18)        | 3.9(16)         |
| C20  | 41.8(16)        | 38.7(15)        | 42.7(16)        | -6.9(13)        | -1.4(14)        | -11.8(14)       |
| C4   | 37.3(16)        | 44.4(17)        | 62(2)           | 1.7(15)         | -5.7(15)        | 18.7(14)        |
| C3   | 44.6(18)        | 32.5(15)        | 64(2)           | 8.0(14)         | -8.5(16)        | 6.2(13)         |
| C26  | 52.2(19)        | 90(3)           | 29.5(15)        | -1.2(16)        | -0.9(14)        | -16(2)          |
| C15  | 41.5(17)        | 61(2)           | 44.7(17)        | 3.2(16)         | 8.4(14)         | -12.3(16)       |
| C2   | 31.6(14)        | 33.4(14)        | 47.3(17)        | 2.6(12)         | -2.5(13)        | 0.8(12)         |
| C8   | 30.8(15)        | 78(3)           | 76(3)           | 34(2)           | 10.5(17)        | -0.1(17)        |
| C13  | 49(2)           | 139(5)          | 63(3)           | 49(3)           | 9(2)            | 3(3)            |
| C24  | 39.5(17)        | 101(3)          | 47.3(19)        | -2(2)           | 16.7(16)        | 13.7(18)        |
| C19  | 43.8(18)        | 69(2)           | 49.5(19)        | -21.0(17)       | 3.9(15)         | -21.8(18)       |
| C17  | 48.1(19)        | 89(3)           | 29.2(15)        | -3.1(16)        | -2.2(14)        | -5.7(19)        |
| C25  | 60(2)           | 97(3)           | 42.0(19)        | -17(2)          | 17.7(17)        | -5(2)           |
| C18  | 44.8(18)        | 95(3)           | 43.8(18)        | -29.5(19)       | 5.2(15)         | -21(2)          |
| C14  | 46(2)           | 125(4)          | 45(2)           | 8(2)            | 5.6(17)         | -23(2)          |
| C12  | 63(3)           | 80(3)           | 101(4)          | 52(3)           | 28(3)           | 23(2)           |

**Supplementary Table S24 Bond Lengths for B\_a.**

| Atom | Atom | Length/ $\text{\AA}$ | Atom | Atom | Length/ $\text{\AA}$ |
|------|------|----------------------|------|------|----------------------|
| Ni1  | P002 | 2.2629(8)            | C9   | C10  | 1.503(4)             |
| Ni1  | Cl1  | 2.1957(11)           | C9   | C8   | 1.530(5)             |
| Ni1  | Cl2  | 2.2269(12)           | C22  | C23  | 1.526(4)             |
| Ni1  | N1   | 1.990(2)             | C5   | C4   | 1.380(5)             |

**Supplementary Table S24 Bond Lengths for B\_a.**

| Atom | Atom | Length/Å | Atom | Atom | Length/Å |
|------|------|----------|------|------|----------|
| P002 | C21  | 1.847(3) | C16  | C17  | 1.526(4) |
| P002 | C1   | 1.829(3) | C23  | C24  | 1.532(4) |
| P002 | C22  | 1.842(3) | C10  | C11  | 1.383(5) |
| O1   | C7   | 1.353(3) | C10  | C15  | 1.388(5) |
| O1   | C8   | 1.438(4) | C11  | C12  | 1.392(7) |
| N1   | C9   | 1.490(4) | C20  | C19  | 1.522(5) |
| N1   | C7   | 1.276(4) | C4   | C3   | 1.370(5) |
| C21  | C16  | 1.528(4) | C3   | C2   | 1.386(4) |
| C21  | C20  | 1.529(4) | C26  | C25  | 1.510(6) |
| C6   | C1   | 1.408(4) | C15  | C14  | 1.382(6) |
| C6   | C7   | 1.476(4) | C13  | C14  | 1.361(8) |
| C6   | C5   | 1.399(4) | C13  | C12  | 1.358(8) |
| C27  | C22  | 1.531(4) | C24  | C25  | 1.515(6) |
| C27  | C26  | 1.528(4) | C19  | C18  | 1.518(5) |
| C1   | C2   | 1.391(4) | C17  | C18  | 1.504(6) |

**Supplementary Table S25 Bond Angles for B\_a.**

| Atom | Atom | Atom | Angle/°    | Atom | Atom | Atom | Angle/°    |
|------|------|------|------------|------|------|------|------------|
| Cl1  | Ni1  | P002 | 107.14(4)  | O1   | C7   | C6   | 114.4(2)   |
| Cl1  | Ni1  | Cl2  | 124.78(5)  | N1   | C7   | O1   | 115.9(3)   |
| Cl2  | Ni1  | P002 | 108.99(4)  | N1   | C7   | C6   | 129.8(2)   |
| N1   | Ni1  | P002 | 92.50(7)   | C27  | C22  | P002 | 112.61(19) |
| N1   | Ni1  | Cl1  | 120.88(8)  | C23  | C22  | P002 | 108.65(19) |
| N1   | Ni1  | Cl2  | 97.72(8)   | C23  | C22  | C27  | 109.9(2)   |
| C21  | P002 | Ni1  | 113.64(9)  | C4   | C5   | C6   | 121.3(3)   |
| C1   | P002 | Ni1  | 108.99(9)  | C17  | C16  | C21  | 110.8(3)   |
| C1   | P002 | C21  | 105.94(12) | C22  | C23  | C24  | 111.1(3)   |

**Supplementary Table S25 Bond Angles for B\_a.**

| Atom Atom Atom |      |      |  | Angle/°    | Atom Atom Atom |     |     |  | Angle/°  |
|----------------|------|------|--|------------|----------------|-----|-----|--|----------|
| C1             | P002 | C22  |  | 107.04(12) | C11            | C10 | C9  |  | 120.5(3) |
| C22            | P002 | Ni1  |  | 115.74(9)  | C11            | C10 | C15 |  | 118.9(3) |
| C22            | P002 | C21  |  | 104.85(12) | C15            | C10 | C9  |  | 120.6(3) |
| C7             | O1   | C8   |  | 107.7(2)   | C10            | C11 | C12 |  | 119.9(4) |
| C9             | N1   | Ni1  |  | 119.83(19) | C19            | C20 | C21 |  | 110.7(3) |
| C7             | N1   | Ni1  |  | 130.0(2)   | C3             | C4  | C5  |  | 119.6(3) |
| C7             | N1   | C9   |  | 108.8(2)   | C4             | C3  | C2  |  | 120.1(3) |
| C16            | C21  | P002 |  | 111.86(19) | C25            | C26 | C27 |  | 111.6(3) |
| C16            | C21  | C20  |  | 110.7(2)   | C14            | C15 | C10 |  | 120.2(4) |
| C20            | C21  | P002 |  | 114.3(2)   | C3             | C2  | C1  |  | 121.5(3) |
| C1             | C6   | C7   |  | 124.9(2)   | O1             | C8  | C9  |  | 105.0(3) |
| C5             | C6   | C1   |  | 119.1(3)   | C12            | C13 | C14 |  | 120.6(4) |
| C5             | C6   | C7   |  | 116.0(3)   | C25            | C24 | C23 |  | 111.3(3) |
| C26            | C27  | C22  |  | 110.4(2)   | C18            | C19 | C20 |  | 111.3(3) |
| C6             | C1   | P002 |  | 123.3(2)   | C18            | C17 | C16 |  | 112.2(3) |
| C2             | C1   | P002 |  | 118.3(2)   | C26            | C25 | C24 |  | 111.3(3) |
| C2             | C1   | C6   |  | 118.4(2)   | C17            | C18 | C19 |  | 111.6(3) |
| N1             | C9   | C10  |  | 112.2(2)   | C13            | C14 | C15 |  | 120.2(5) |
| N1             | C9   | C8   |  | 102.6(2)   | C13            | C12 | C11 |  | 120.2(4) |
| C10            | C9   | C8   |  | 114.2(3)   |                |     |     |  |          |

**Supplementary Table S26 Torsion Angles for B\_a.**

| A   | B    | C   | D   | Angle/°     | A  | B   | C   | D   | Angle/°   |
|-----|------|-----|-----|-------------|----|-----|-----|-----|-----------|
| Ni1 | P002 | C21 | C16 | -42.3(2)    | C9 | C10 | C15 | C14 | 179.5(3)  |
| Ni1 | P002 | C21 | C20 | -169.22(18) | C7 | O1  | C8  | C9  | -2.3(4)   |
| Ni1 | P002 | C1  | C6  | 22.8(2)     | C7 | N1  | C9  | C10 | -125.7(3) |
| Ni1 | P002 | C1  | C2  | -155.7(2)   | C7 | N1  | C9  | C8  | -2.7(3)   |

**Supplementary Table S26 Torsion Angles for B\_a.**

| A    | B    | C   | D   | Angle/°   | A   | B    | C   | D    | Angle/°   |
|------|------|-----|-----|-----------|-----|------|-----|------|-----------|
| Ni1  | P002 | C22 | C27 | 69.1(2)   | C7  | C6   | C1  | P002 | 1.3(4)    |
| Ni1  | P002 | C22 | C23 | -52.8(2)  | C7  | C6   | C1  | C2   | 179.9(3)  |
| Ni1  | N1   | C9  | C10 | 66.1(3)   | C7  | C6   | C5  | C4   | -179.6(3) |
| Ni1  | N1   | C9  | C8  | -170.9(2) | C22 | P002 | C21 | C16  | -169.7(2) |
| Ni1  | N1   | C7  | O1  | 168.0(2)  | C22 | P002 | C21 | C20  | 63.4(2)   |
| Ni1  | N1   | C7  | C6  | -11.0(5)  | C22 | P002 | C1  | C6   | 148.7(2)  |
| P002 | C21  | C16 | C17 | 175.8(2)  | C22 | P002 | C1  | C2   | -29.9(3)  |
| P002 | C21  | C20 | C19 | -175.9(2) | C22 | C27  | C26 | C25  | 57.0(4)   |
| P002 | C1   | C2  | C3  | 178.3(3)  | C22 | C23  | C24 | C25  | -55.8(5)  |
| P002 | C22  | C23 | C24 | -179.4(3) | C5  | C6   | C1  | P002 | -179.2(2) |
| N1   | C9   | C10 | C11 | -127.1(3) | C5  | C6   | C1  | C2   | -0.7(4)   |
| N1   | C9   | C10 | C15 | 54.6(4)   | C5  | C6   | C7  | O1   | -10.7(4)  |
| N1   | C9   | C8  | O1  | 2.9(4)    | C5  | C6   | C7  | N1   | 168.3(3)  |
| C21  | P002 | C1  | C6  | -99.8(2)  | C5  | C4   | C3  | C2   | -0.9(5)   |
| C21  | P002 | C1  | C2  | 81.6(2)   | C16 | C21  | C20 | C19  | 56.6(3)   |
| C21  | P002 | C22 | C27 | -164.8(2) | C16 | C17  | C18 | C19  | -54.4(4)  |
| C21  | P002 | C22 | C23 | 73.3(2)   | C23 | C24  | C25 | C26  | 54.5(5)   |
| C21  | C16  | C17 | C18 | 54.6(4)   | C10 | C9   | C8  | O1   | 124.6(3)  |
| C21  | C20  | C19 | C18 | -56.3(4)  | C10 | C11  | C12 | C13  | -0.4(6)   |
| C6   | C1   | C2  | C3  | -0.3(4)   | C10 | C15  | C14 | C13  | -0.8(6)   |
| C6   | C5   | C4  | C3  | -0.1(5)   | C11 | C10  | C15 | C14  | 1.2(5)    |
| C27  | C22  | C23 | C24 | 57.0(4)   | C20 | C21  | C16 | C17  | -55.4(3)  |
| C27  | C26  | C25 | C24 | -55.4(4)  | C20 | C19  | C18 | C17  | 55.2(5)   |
| C1   | P002 | C21 | C16 | 77.3(2)   | C4  | C3   | C2  | C1   | 1.1(5)    |
| C1   | P002 | C21 | C20 | -49.6(2)  | C26 | C27  | C22 | P002 | -178.6(3) |
| C1   | P002 | C22 | C27 | -52.6(2)  | C26 | C27  | C22 | C23  | -57.3(4)  |
| C1   | P002 | C22 | C23 | -174.5(2) | C15 | C10  | C11 | C12  | -0.6(5)   |
| C1   | C6   | C7  | O1  | 168.7(3)  | C8  | O1   | C7  | N1   | 0.6(4)    |



**Supplementary Table S26 Torsion Angles for B\_a.**

| A  | B   | C   | D   | Angle/°   | A   | B   | C   | D   | Angle/°  |
|----|-----|-----|-----|-----------|-----|-----|-----|-----|----------|
| C1 | C6  | C7  | N1  | -12.2(5)  | C8  | O1  | C7  | C6  | 179.8(3) |
| C1 | C6  | C5  | C4  | 0.9(5)    | C8  | C9  | C10 | C11 | 116.7(3) |
| C9 | N1  | C7  | O1  | 1.4(3)    | C8  | C9  | C10 | C15 | -61.6(4) |
| C9 | N1  | C7  | C6  | -177.6(3) | C14 | C13 | C12 | C11 | 0.7(7)   |
| C9 | C10 | C11 | C12 | -178.9(3) | C12 | C13 | C14 | C15 | -0.1(7)  |

**Supplementary Table S27 Hydrogen Atom Coordinates ( $\text{\AA}\times 10^4$ ) and Isotropic Displacement Parameters ( $\text{\AA}^2\times 10^3$ ) for B\_a.**

| Atom | <i>x</i> | <i>y</i> | <i>z</i> | U(eq) |
|------|----------|----------|----------|-------|
| H21  | 6748.99  | 6115.8   | 3819.98  | 35    |
| H27A | 4608.12  | 5514.97  | 1669.99  | 51    |
| H27B | 4232.62  | 6536.45  | 1688.73  | 51    |
| H9   | 774.88   | 3820.57  | 3760.28  | 49    |
| H22  | 6324.42  | 6787.33  | 2412.59  | 36    |
| H5   | -621.68  | 6918.18  | 3308.01  | 50    |
| H16A | 3976.89  | 6410.05  | 4528.34  | 46    |
| H16B | 4877     | 5503.3   | 4511.98  | 46    |
| H23A | 6816.97  | 4936.65  | 2382.39  | 57    |
| H23B | 7781.69  | 5609.71  | 2824.39  | 57    |
| H11  | 1619.21  | 2701.25  | 4459.89  | 65    |
| H20A | 6547.63  | 7537.91  | 3385.46  | 49    |
| H20B | 5052.5   | 7703.05  | 3824.97  | 49    |
| H4   | -246.83  | 8227.31  | 2747.15  | 58    |
| H3   | 2145.68  | 8578.51  | 2341.24  | 56    |
| H26A | 5597.05  | 6176.93  | 693.13   | 69    |
| H26B | 6535.41  | 6858.48  | 1137.91  | 69    |
| H15  | 2272.54  | 5175.37  | 5088.13  | 59    |

**Supplementary Table S27 Hydrogen Atom Coordinates ( $\text{\AA}\times 10^4$ ) and Isotropic Displacement Parameters ( $\text{\AA}^2\times 10^3$ ) for B\_a.**

| Atom | <i>x</i> | <i>y</i> | <i>z</i> | U(eq) |
|------|----------|----------|----------|-------|
| H2   | 4179.03  | 7642.52  | 2520.55  | 45    |
| H8A  | -1326.49 | 4526.35  | 4030.57  | 74    |
| H8B  | -559.83  | 4908.64  | 4702.25  | 74    |
| H13  | 3799.73  | 3173.52  | 6197.01  | 100   |
| H24A | 8792     | 6257.92  | 1850.19  | 75    |
| H24B | 9111.24  | 5231.48  | 1819.03  | 75    |
| H19A | 8024.02  | 7391.22  | 4361.63  | 65    |
| H19B | 7148.12  | 8304.78  | 4390.44  | 65    |
| H17A | 5426.5   | 6305.64  | 5511.62  | 66    |
| H17B | 6932.74  | 6116.3   | 5087.41  | 66    |
| H25A | 8187.85  | 5769.26  | 773.7    | 80    |
| H25B | 7102.9   | 5027.13  | 1071.94  | 80    |
| H18A | 6990.26  | 7557.57  | 5435.66  | 73    |
| H18B | 5339.76  | 7732.09  | 5127.91  | 73    |
| H14  | 3522.72  | 4651.74  | 6035.13  | 86    |
| H12  | 2844.74  | 2198.21  | 5427.7   | 98    |

## 10. NMR Spectral Data

Compound 1a ( $^1\text{H}$  NMR and  $^{13}\text{C}$  NMR,  $\text{CDCl}_3$ , 400 MHz and 101 MHz respectively)

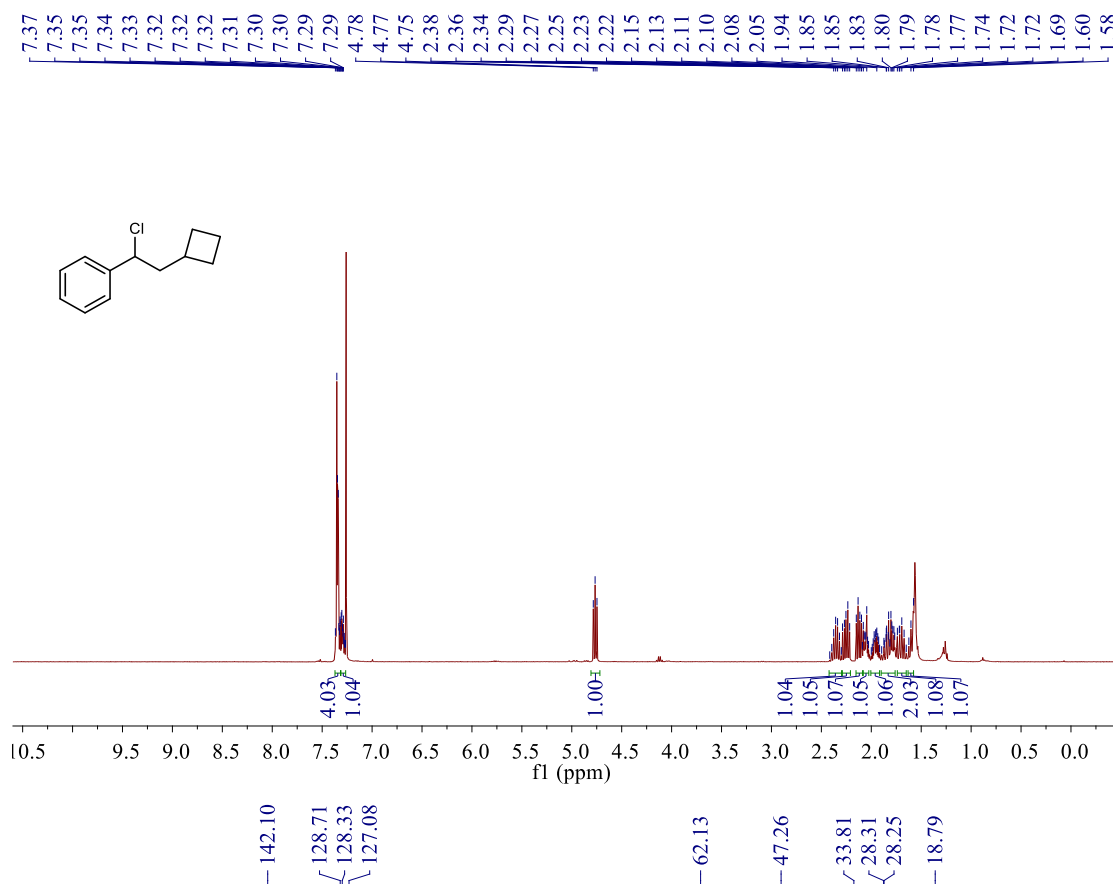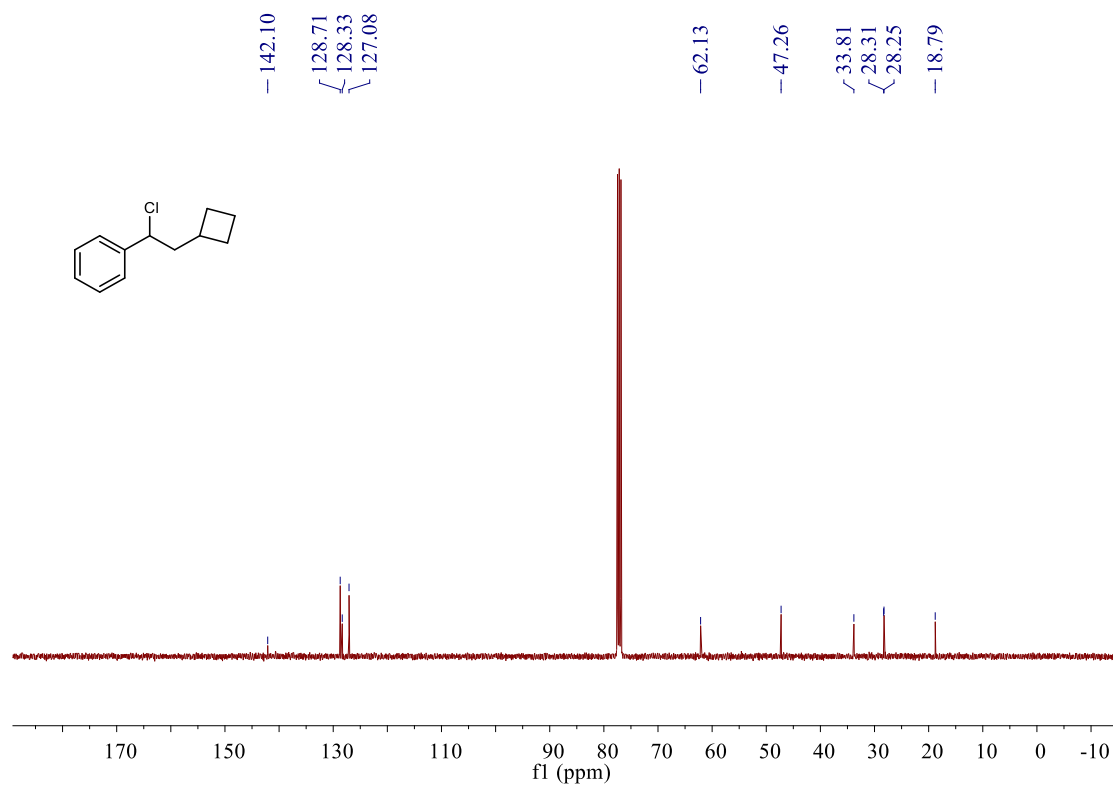

**Compound 1b (<sup>1</sup>H NMR and <sup>13</sup>C NMR, CDCl<sub>3</sub>, 400 MHz and 101 MHz respectively)**

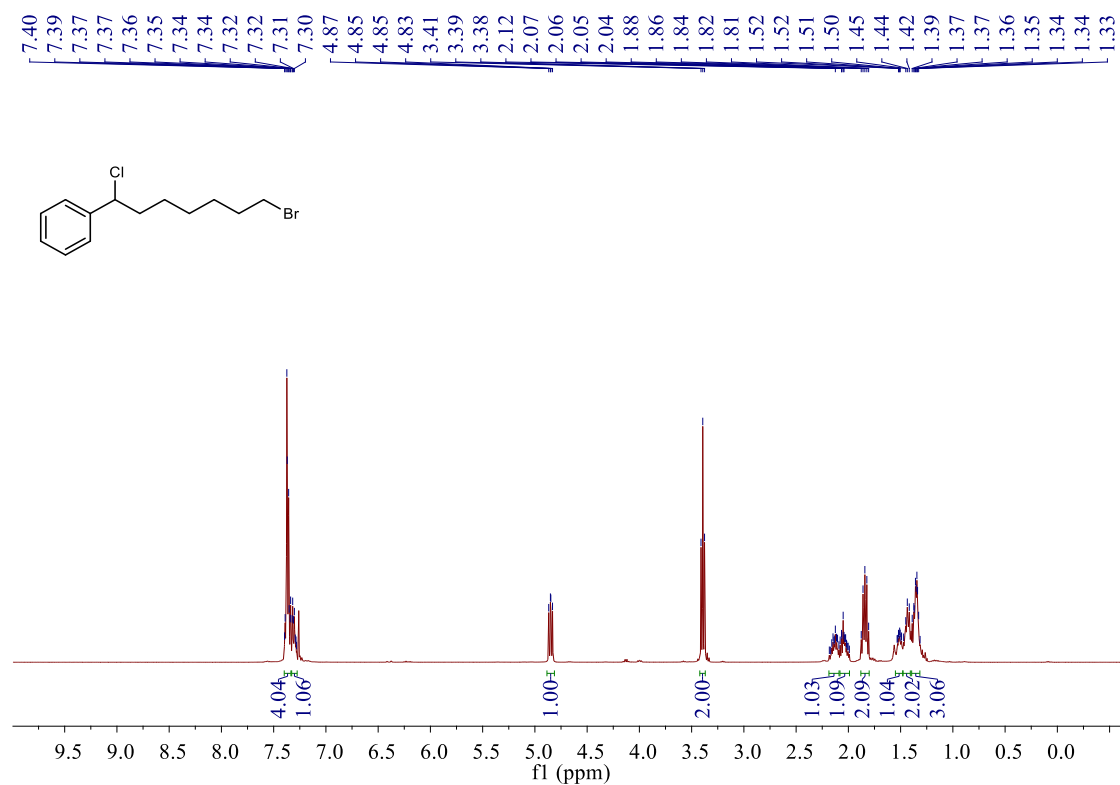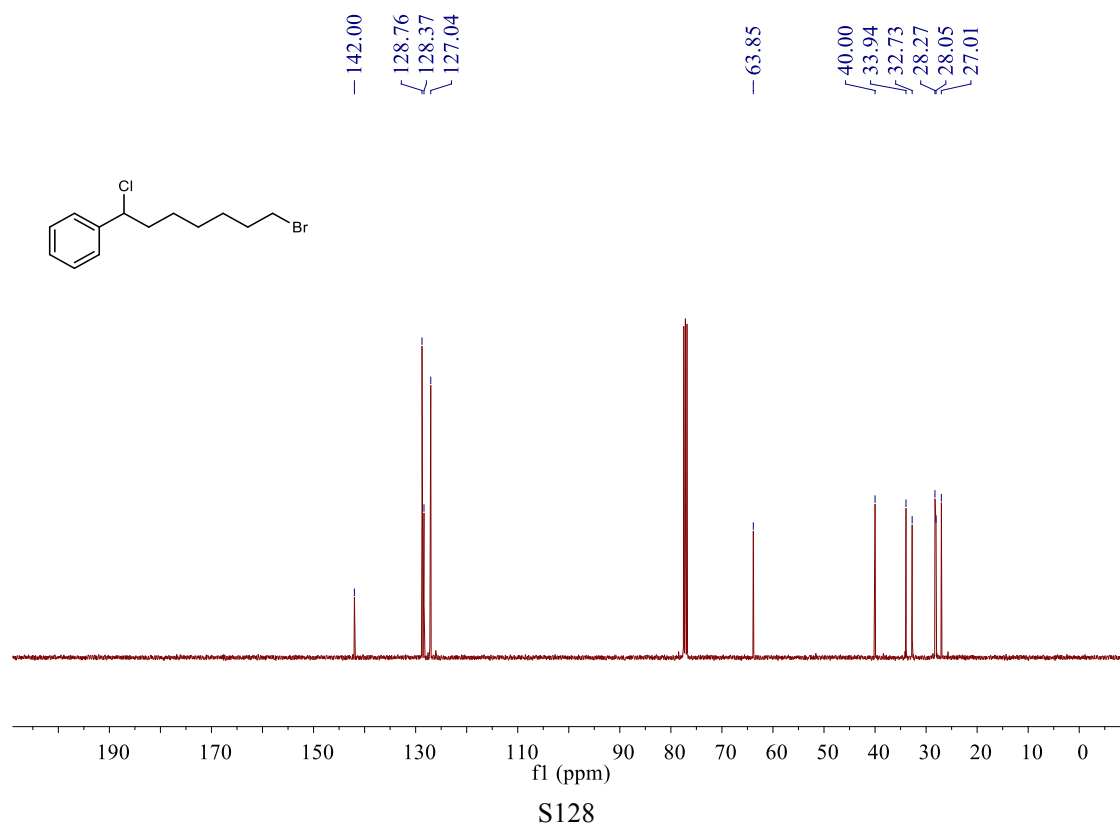

**Compound 1c ( $^1\text{H}$  NMR and  $^{13}\text{C}$  NMR,  $\text{CDCl}_3$ , 400 MHz and 101 MHz respectively)**

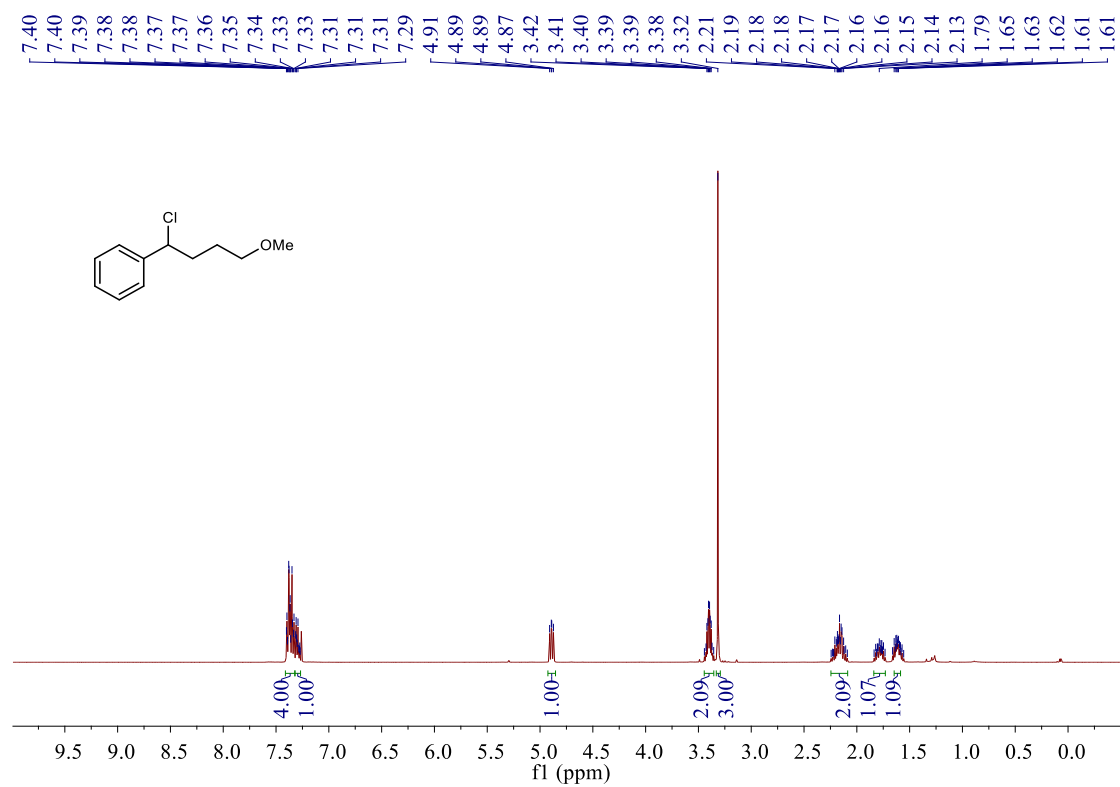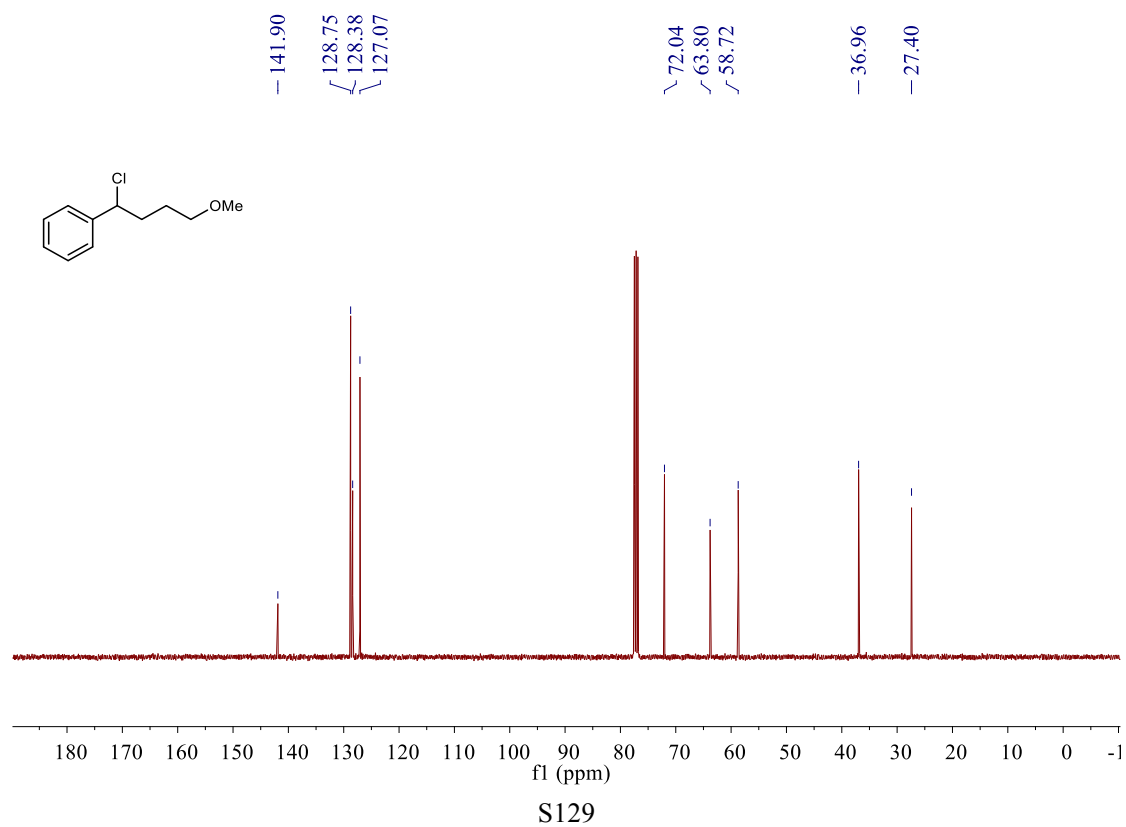

**Compound 1d ( $^1\text{H}$  NMR and  $^{13}\text{C}$  NMR,  $\text{CDCl}_3$ , 400 MHz and 101 MHz respectively)**

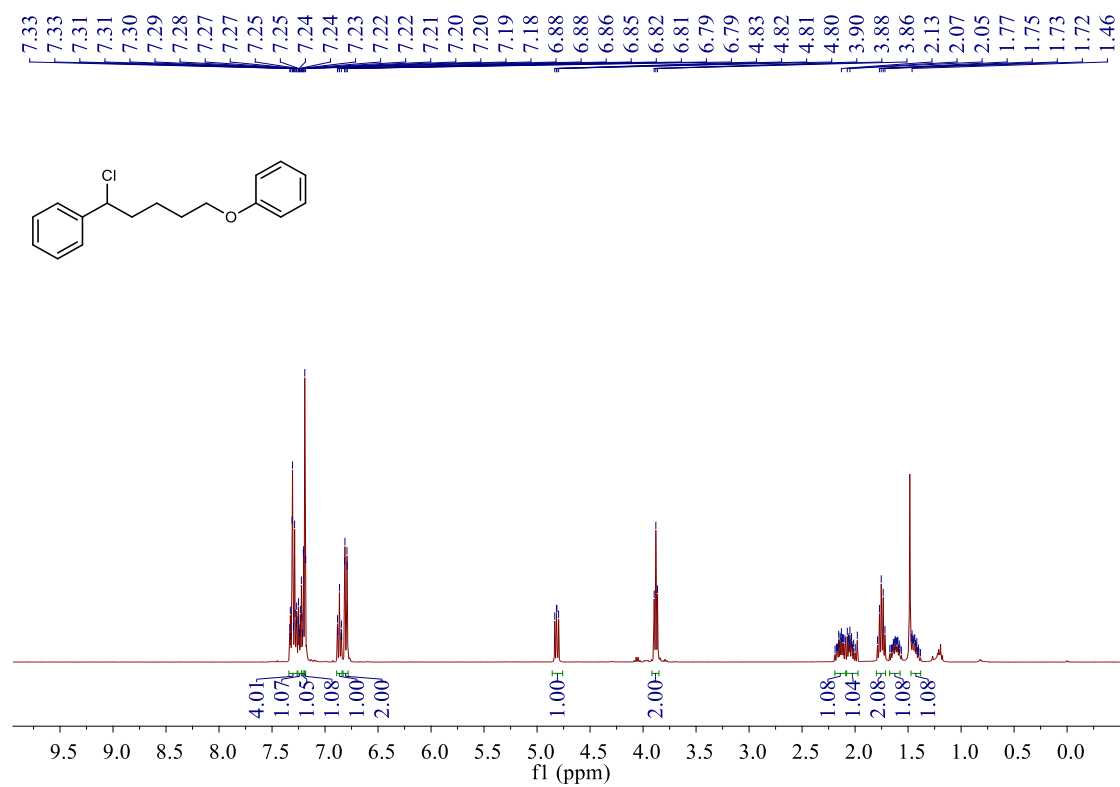

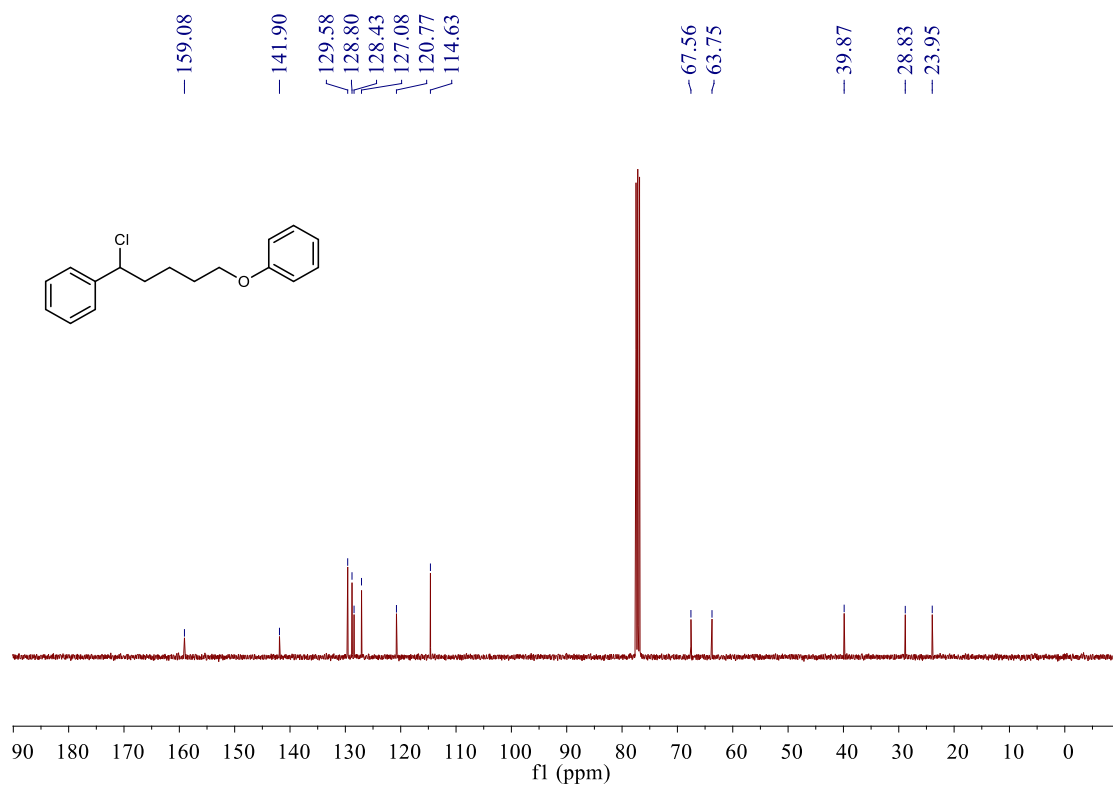

**Compound 1e (<sup>1</sup>H NMR, <sup>13</sup>C NMR and <sup>19</sup>F NMR, CDCl<sub>3</sub>, 400 MHz, 101 MHz and 377 MHz respectively)**

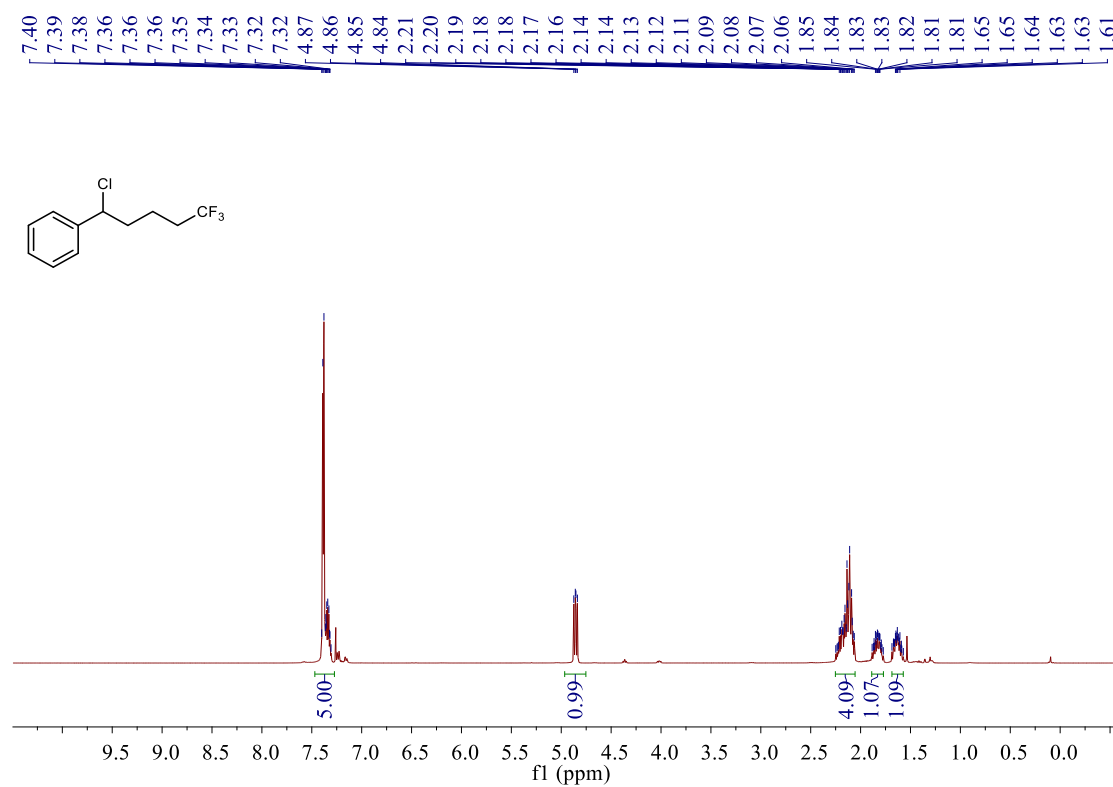

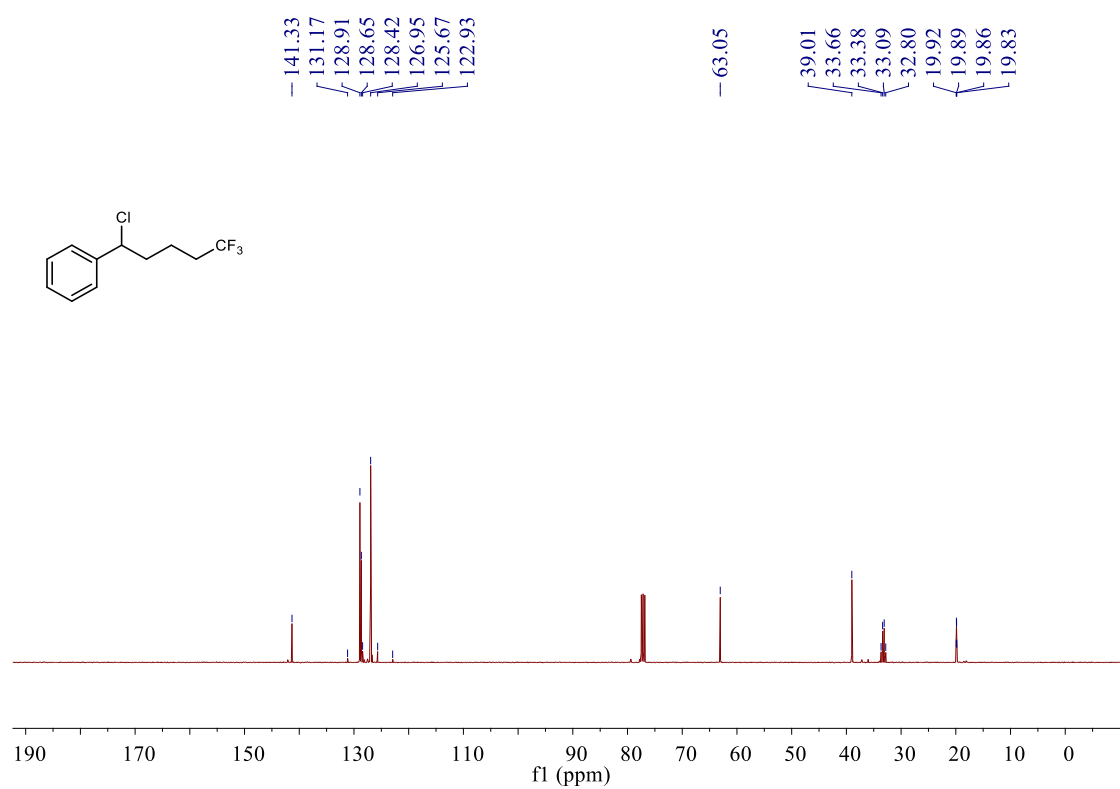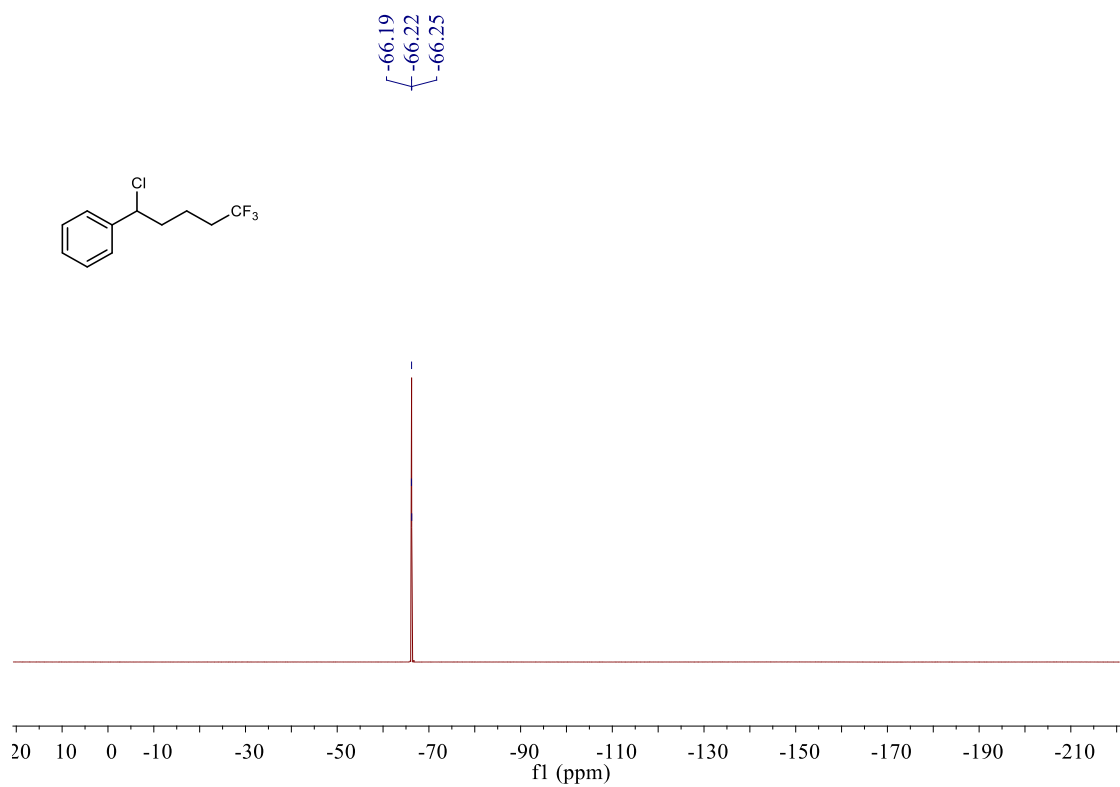



**Compound 1f ( $^1\text{H}$  NMR and  $^{13}\text{C}$  NMR,  $\text{CDCl}_3$ , 400 MHz and 101 MHz respectively)**

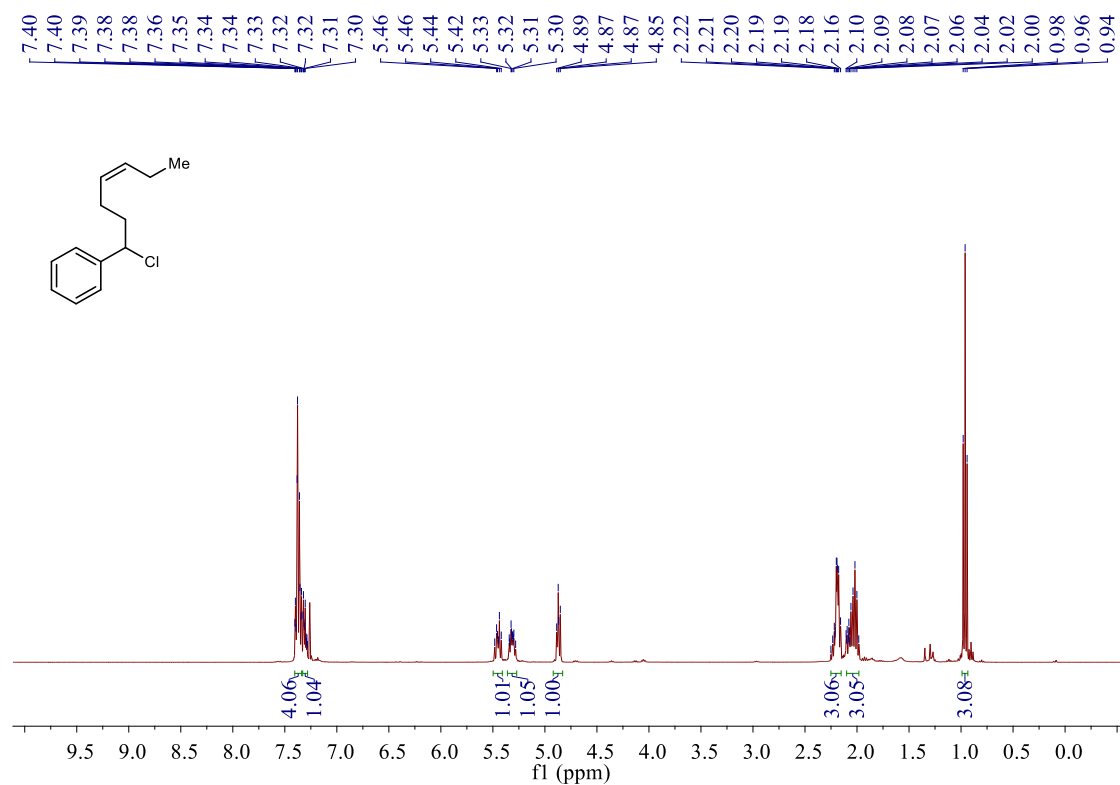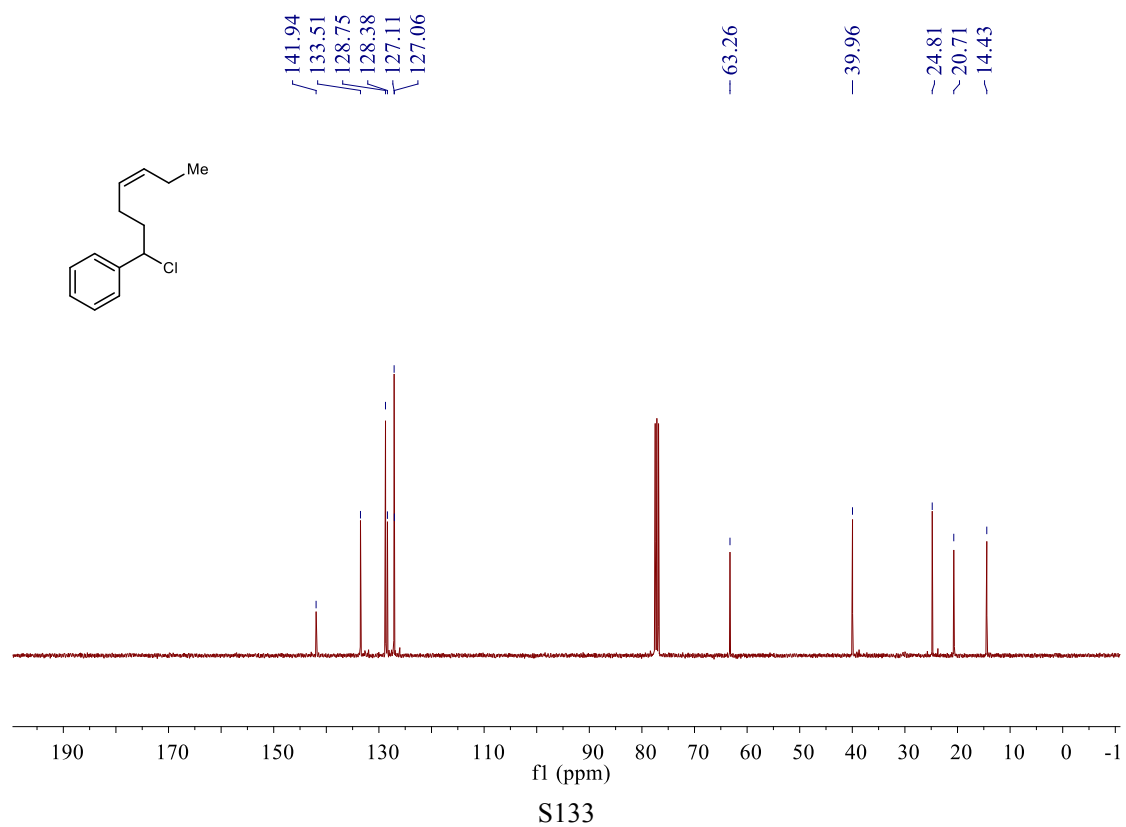

**Compound 1g ( $^1\text{H}$  NMR and  $^{13}\text{C}$  NMR,  $\text{CDCl}_3$ , 400 MHz and 101 MHz respectively)**

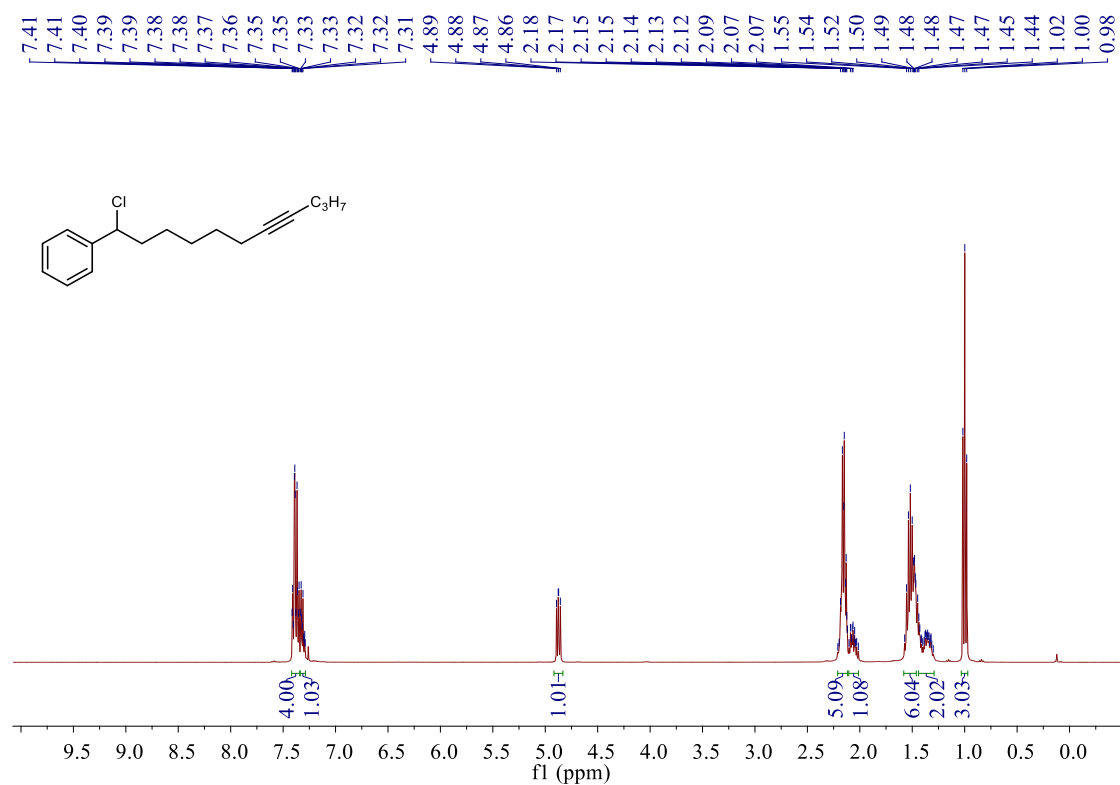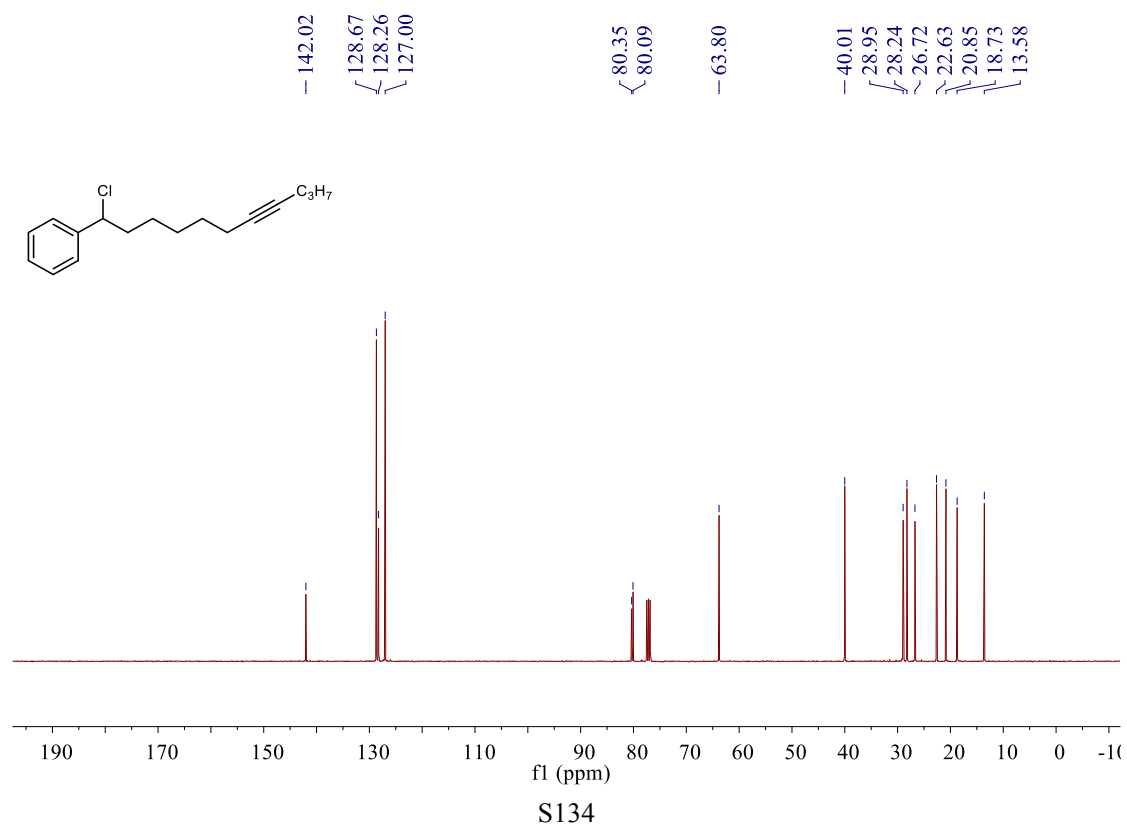

**Compound 1h (<sup>1</sup>H NMR and <sup>13</sup>C NMR, CDCl<sub>3</sub>, 400 MHz and 101 MHz respectively)**

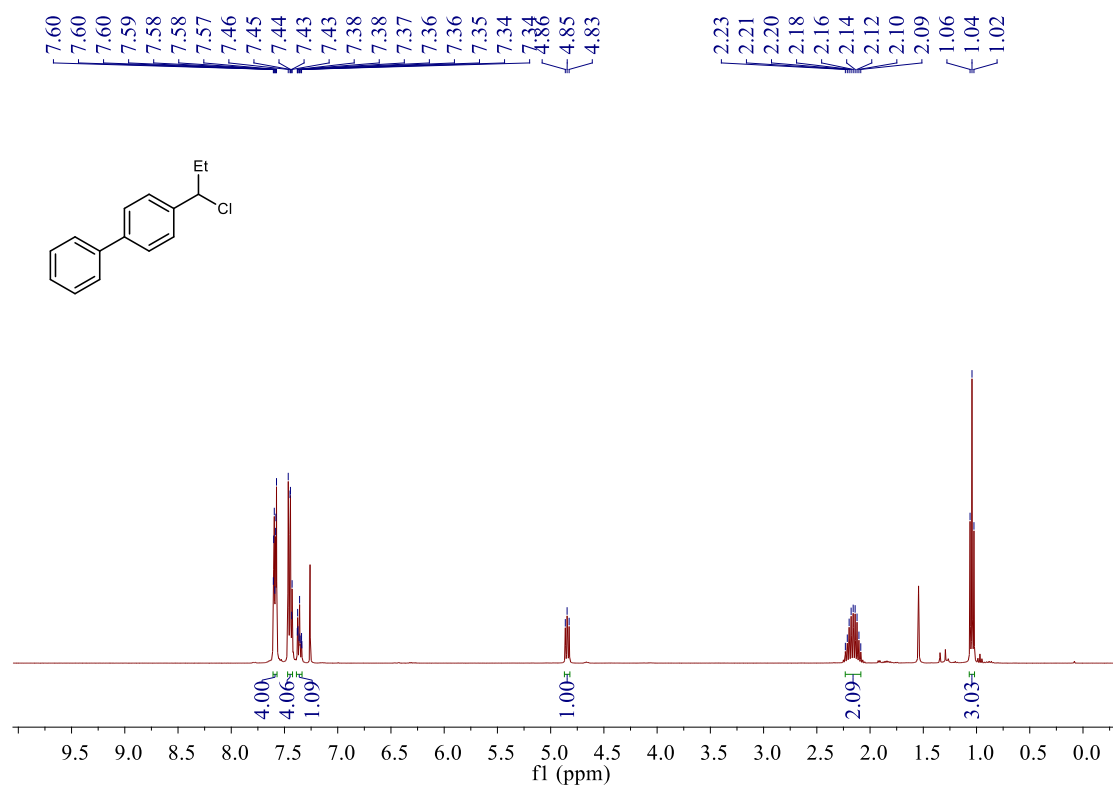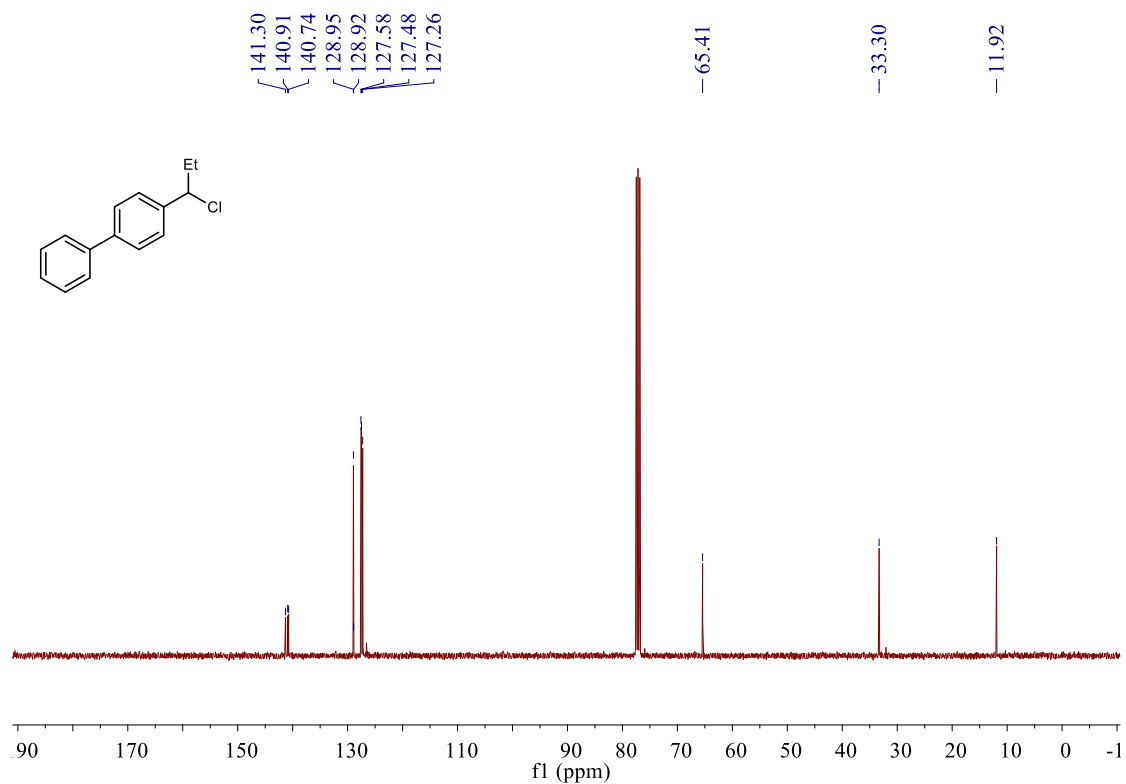

**Compound 1i ( $^1\text{H}$  NMR and  $^{13}\text{C}$  NMR,  $\text{CDCl}_3$ , 400 MHz and 101 MHz respectively)**

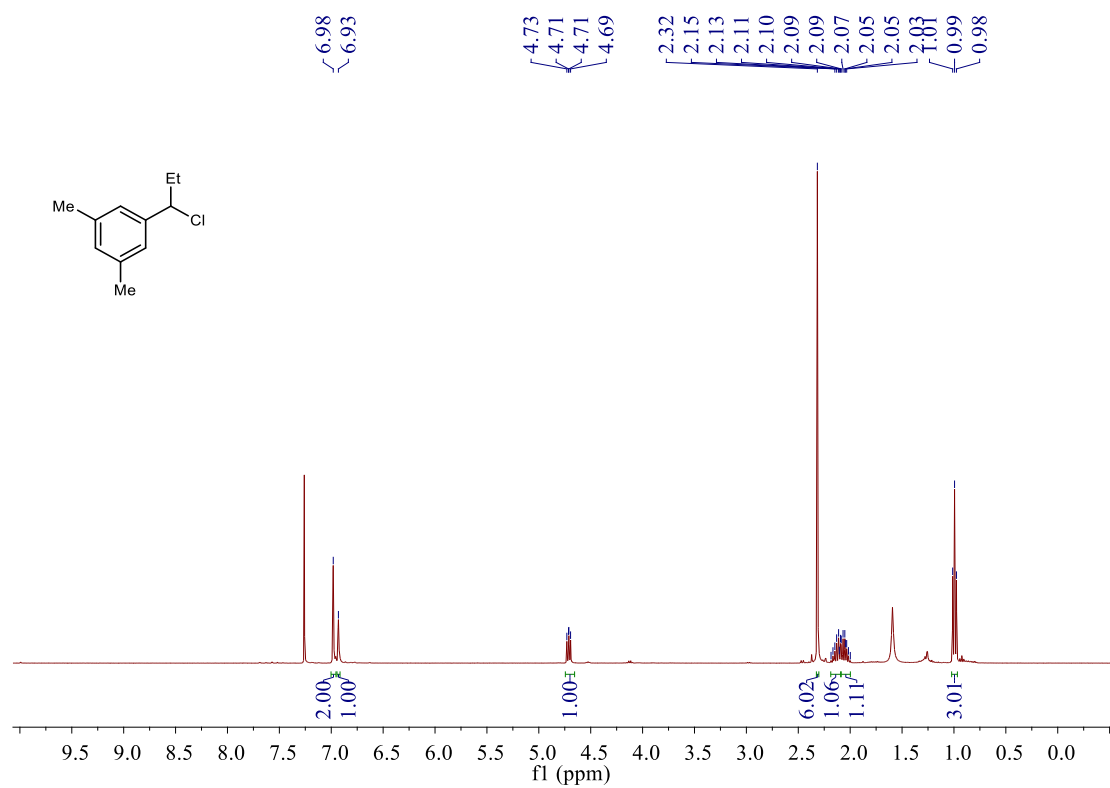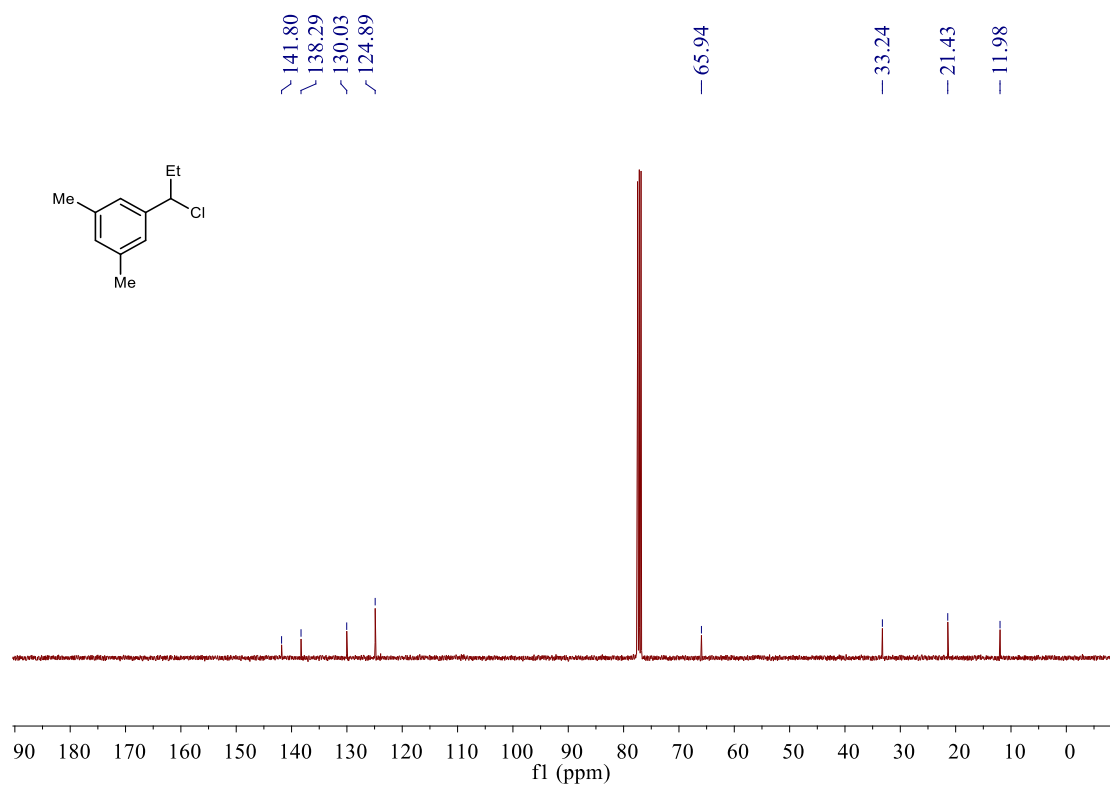

**Compound (S)-L5 (<sup>1</sup>H NMR, <sup>13</sup>C NMR and <sup>31</sup>P NMR, CDCl<sub>3</sub>, 400 MHz, 101 MHz and 162 MHz respectively)**

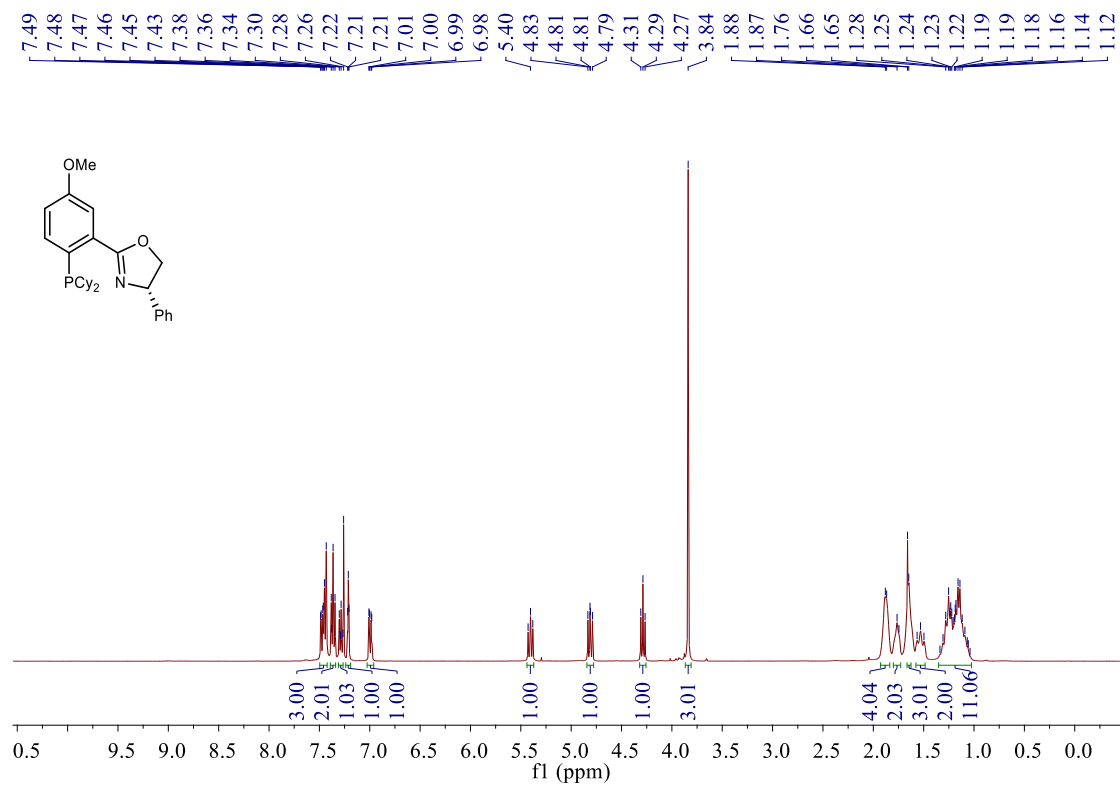

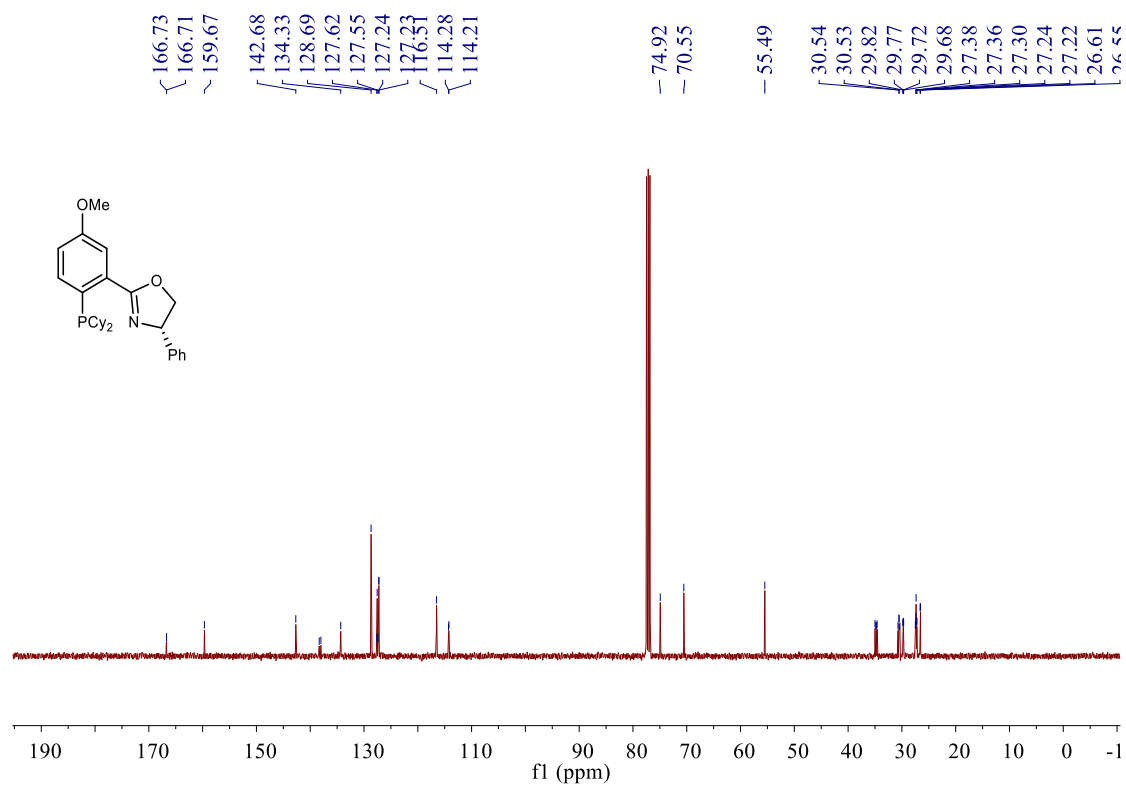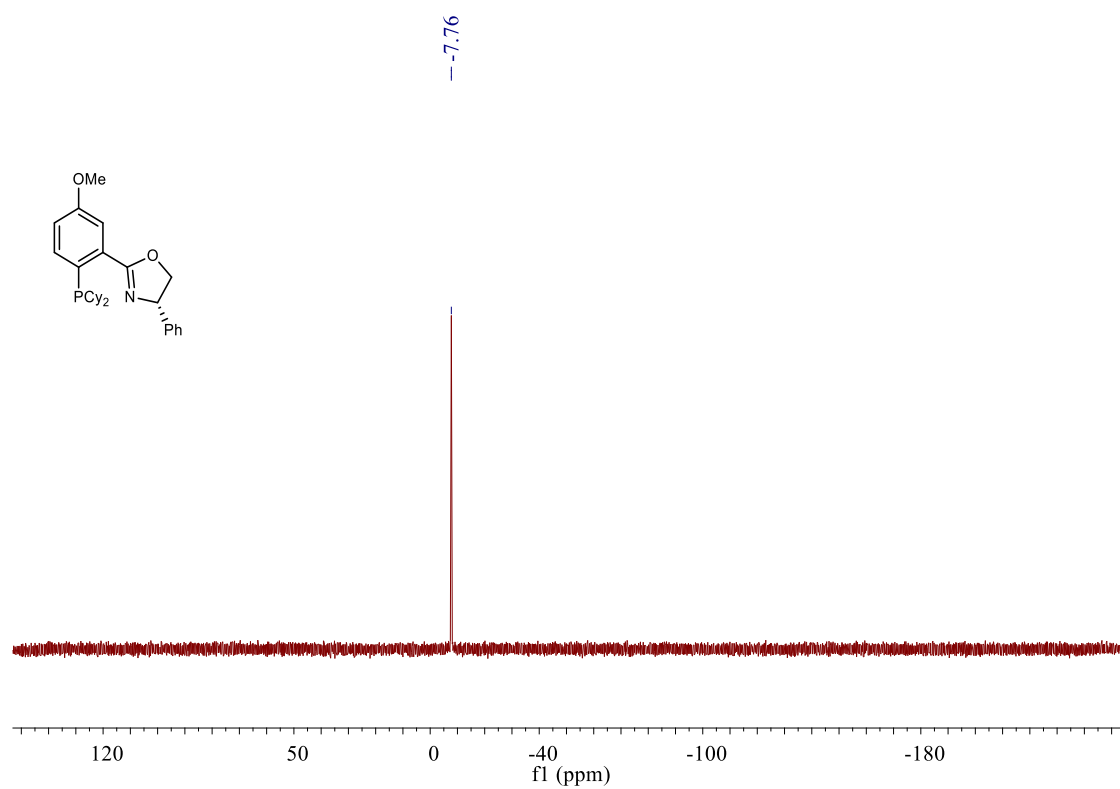

**Compound 3 ( $^1\text{H}$  NMR and  $^{13}\text{C}$  NMR,  $\text{CDCl}_3$ , 400 MHz and 101 MHz respectively)**

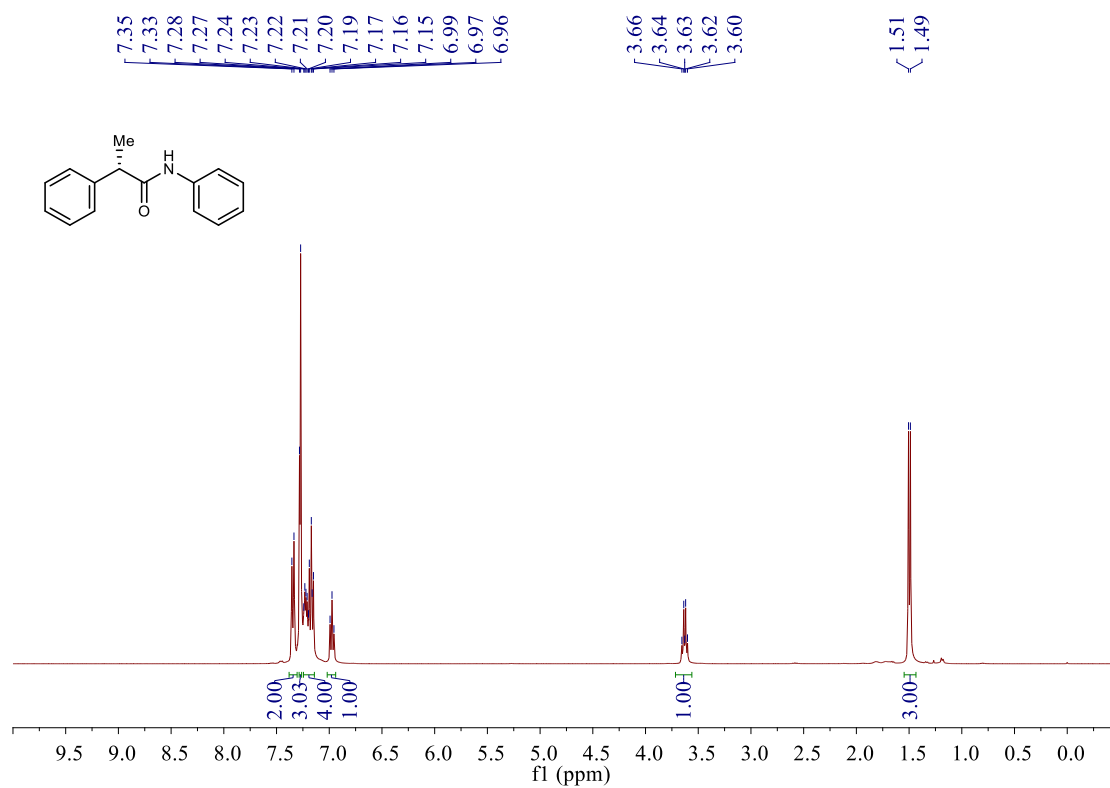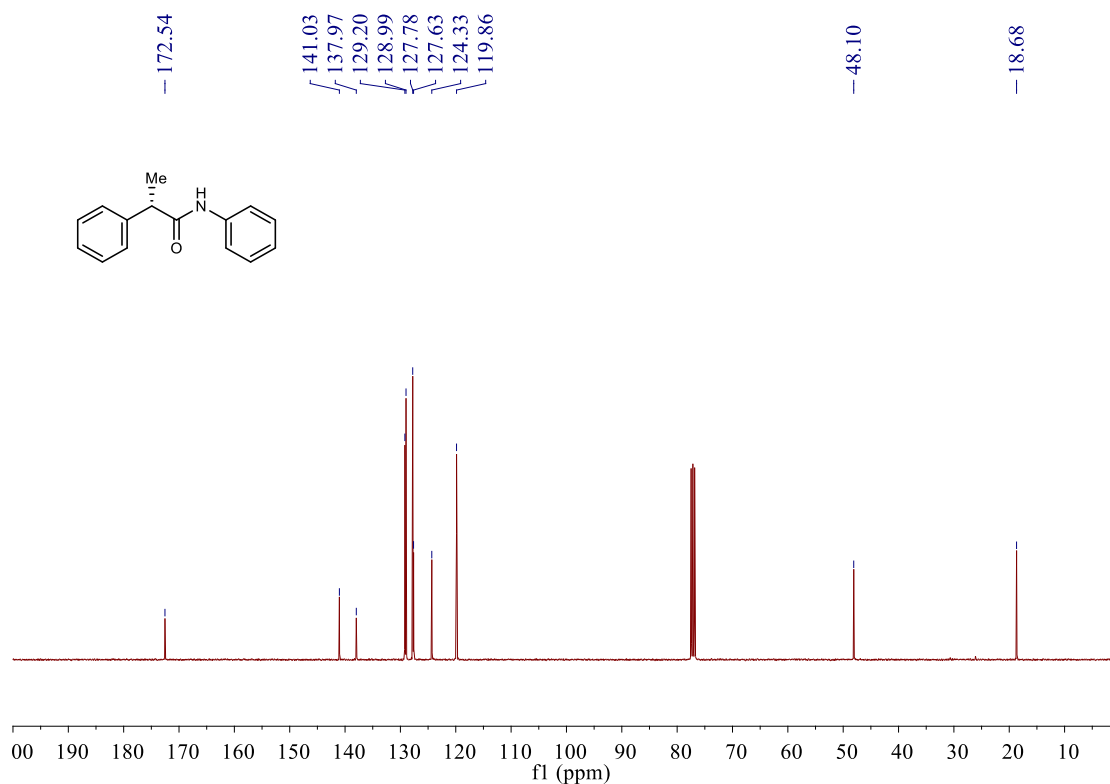

**Compound 8 ( $^1\text{H}$  NMR and  $^{13}\text{C}$  NMR,  $\text{CDCl}_3$ , 400 MHz and 101 MHz respectively)**

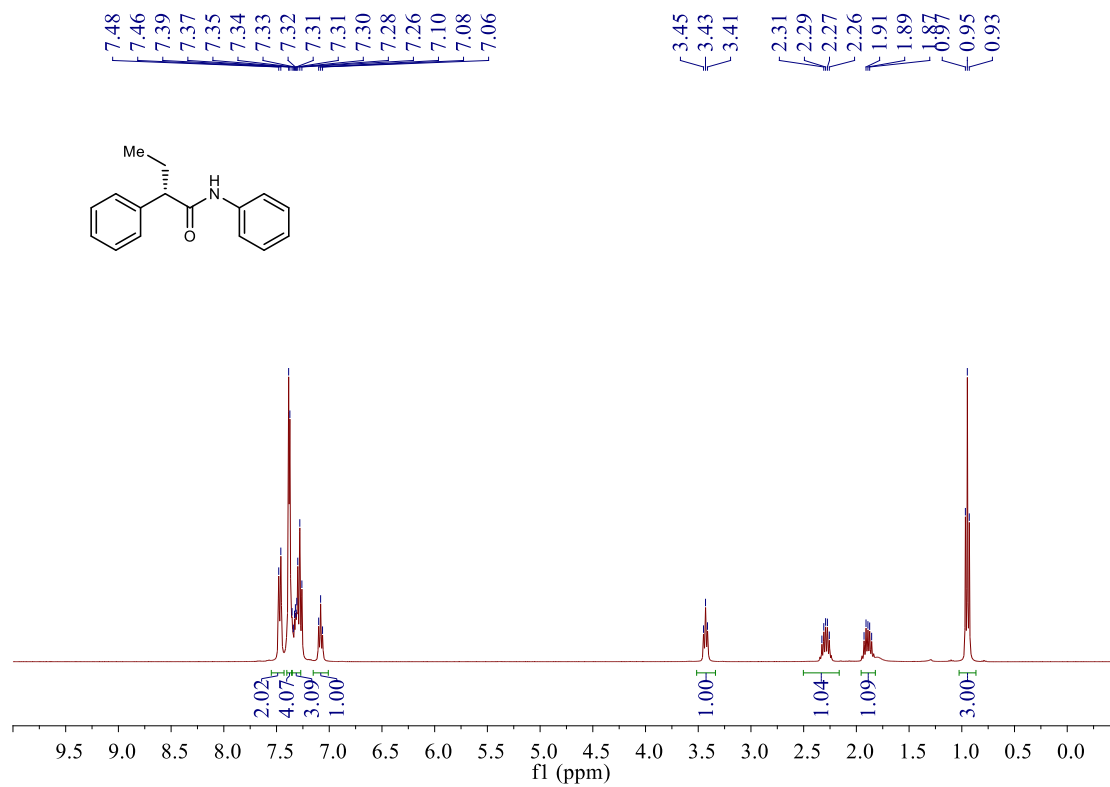



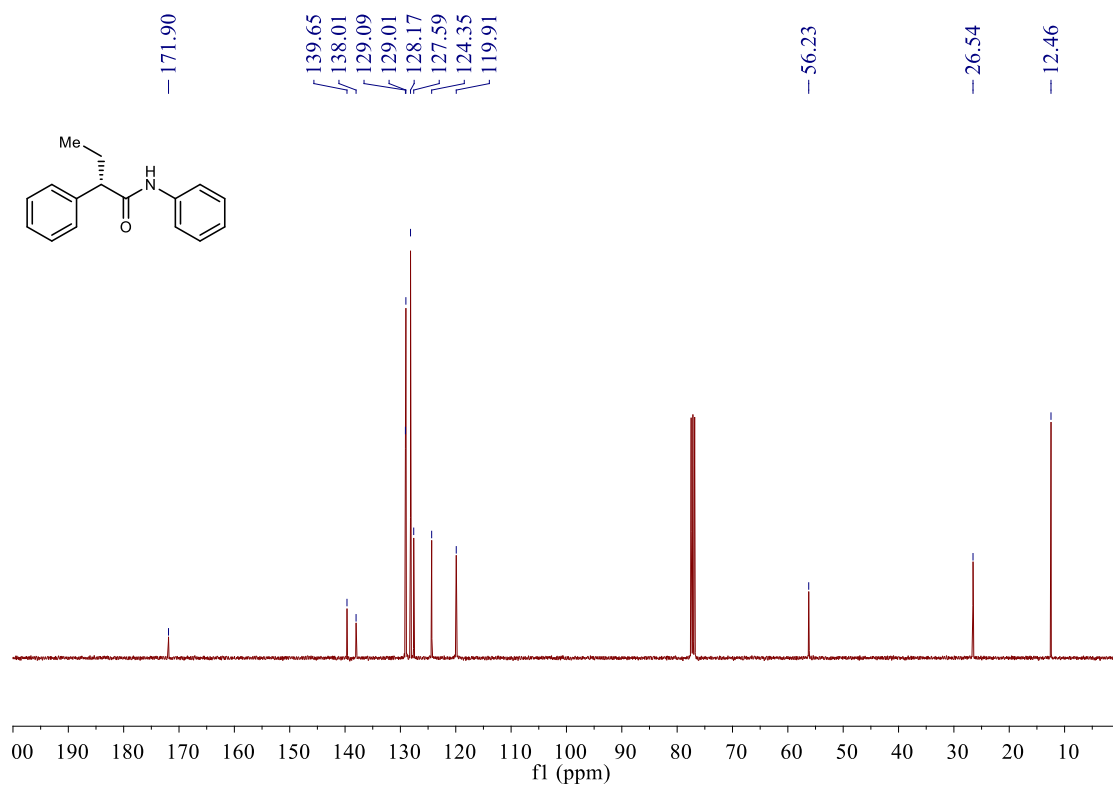

**Compound 9 (<sup>1</sup>H NMR and <sup>13</sup>C NMR, CDCl<sub>3</sub>, 400 MHz and 101 MHz respectively)**

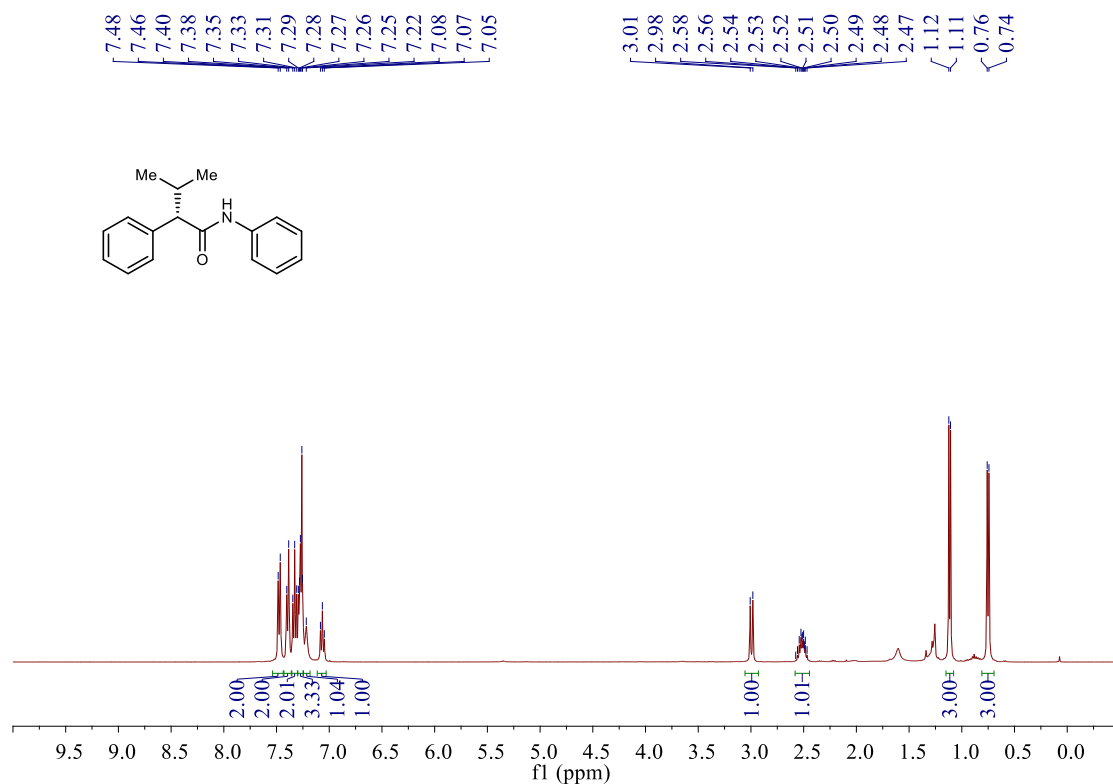

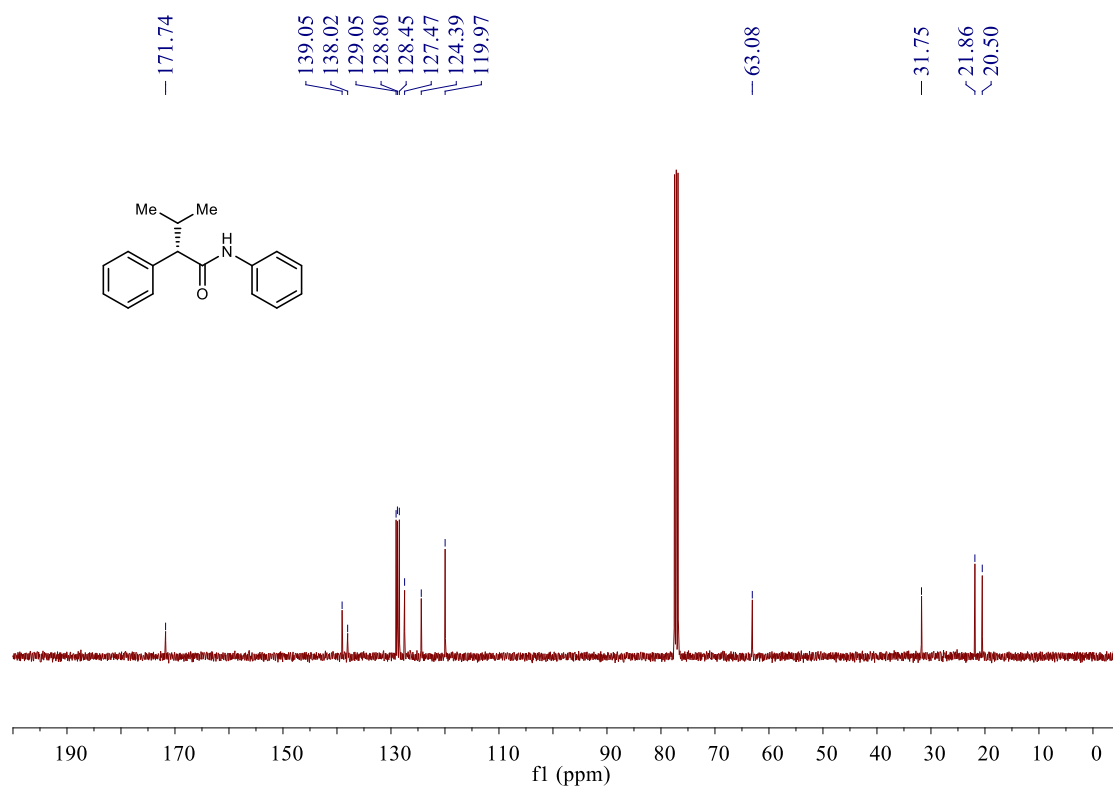

**Compound 10 (<sup>1</sup>H NMR and <sup>13</sup>C NMR, CDCl<sub>3</sub>, 400 MHz and 101 MHz respectively)**

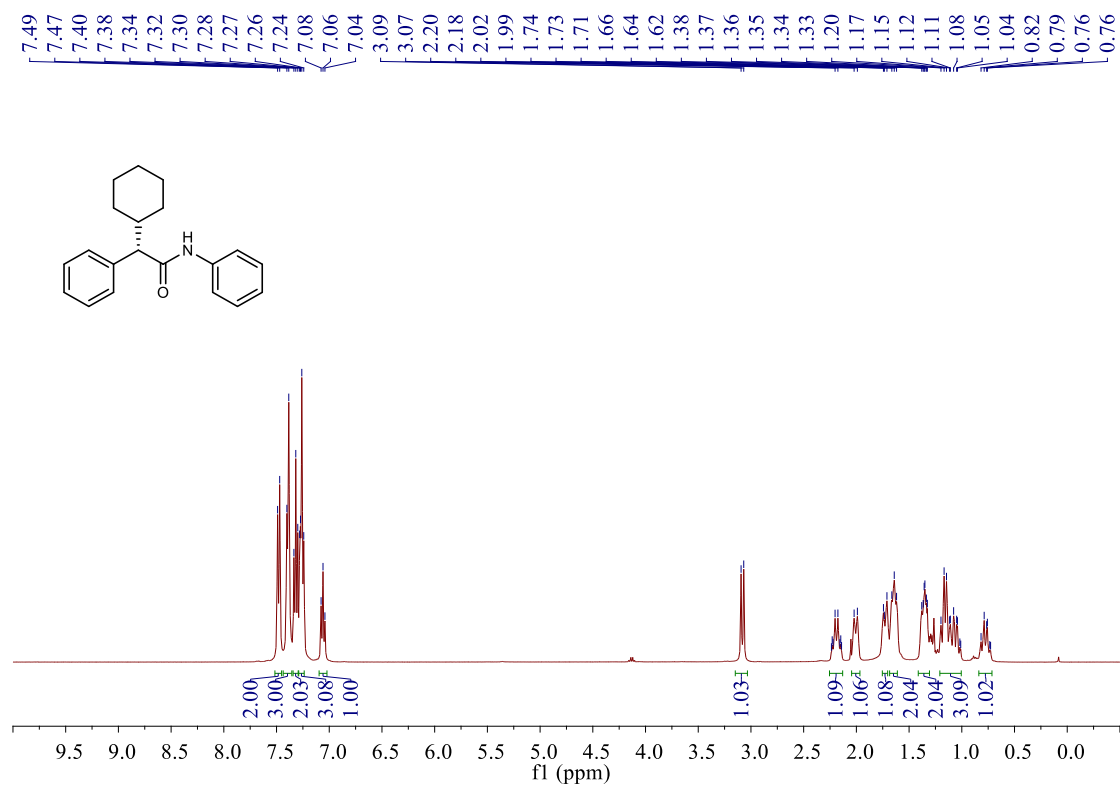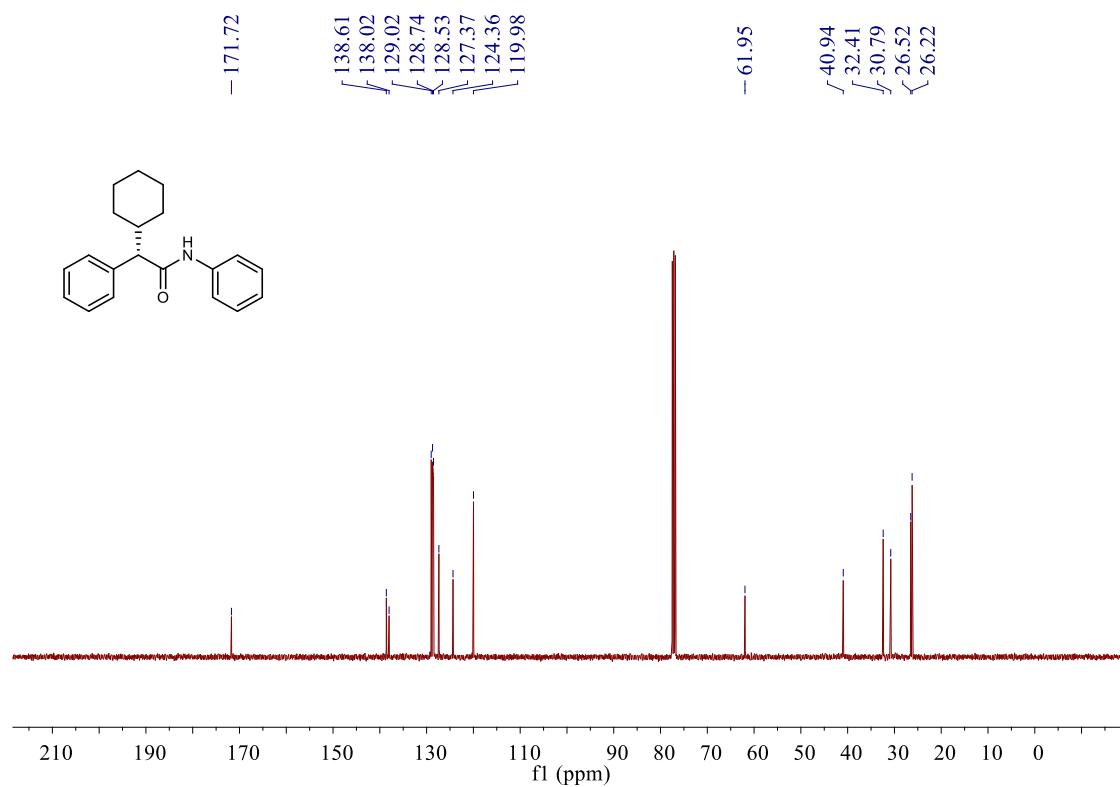

**Compound 11 (<sup>1</sup>H NMR and <sup>13</sup>C NMR, CDCl<sub>3</sub>, 400 MHz and 101 MHz respectively)**

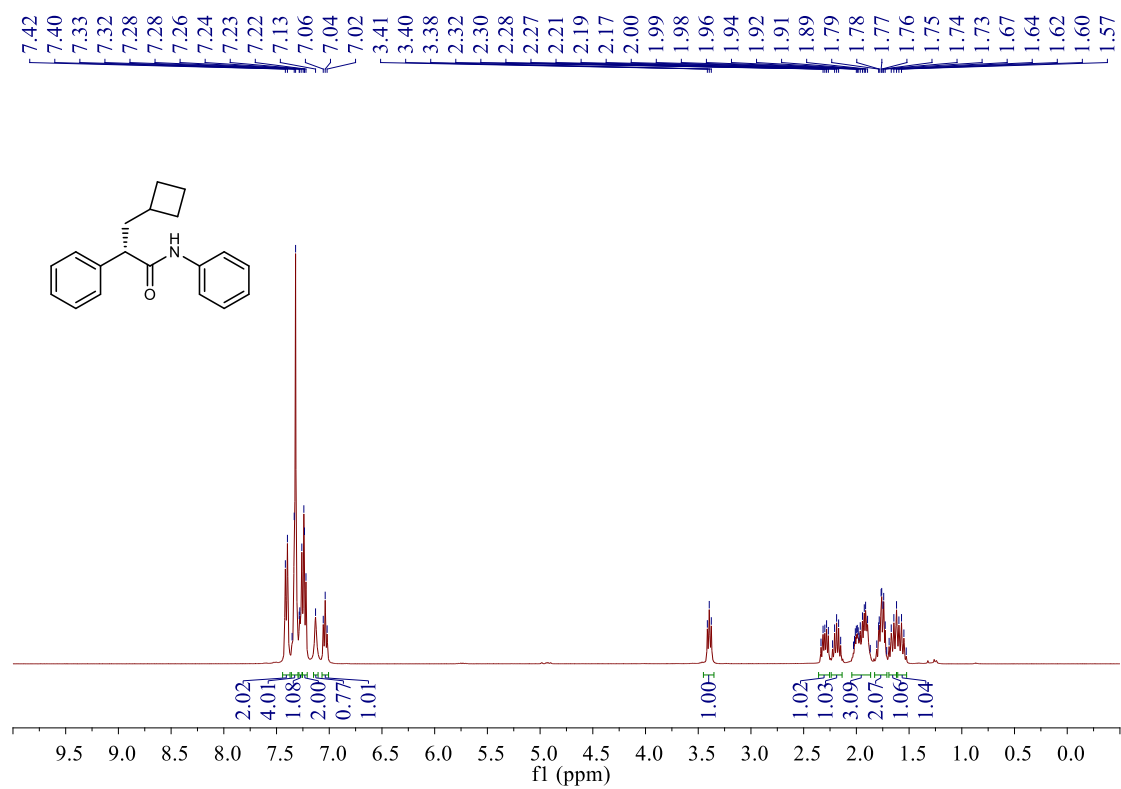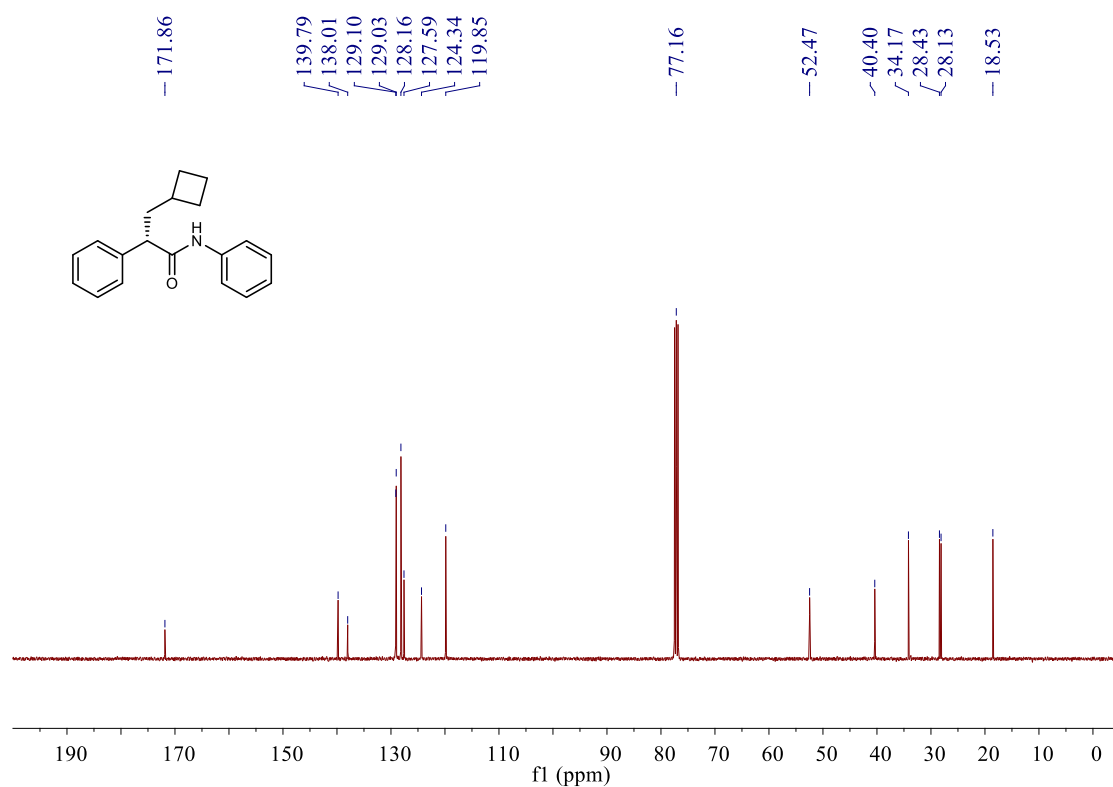

**Compound 12 ( $^1\text{H}$  NMR and  $^{13}\text{C}$  NMR,  $\text{CDCl}_3$ , 400 MHz and 101 MHz respectively)**

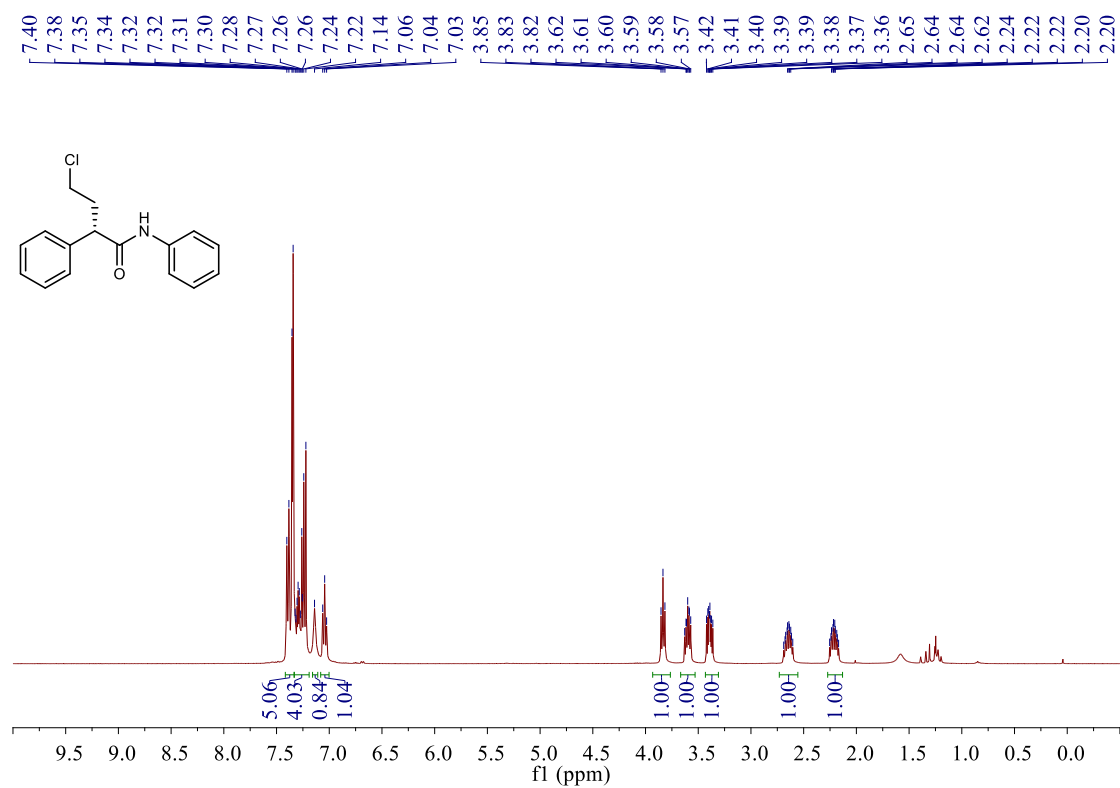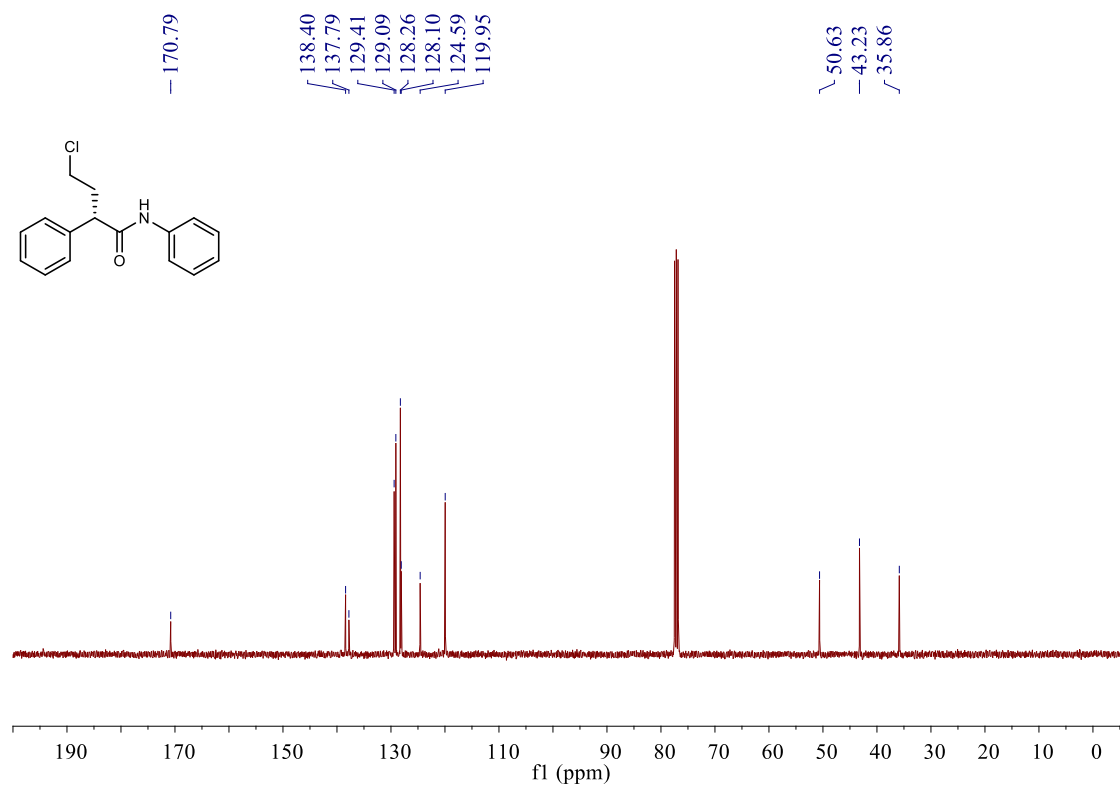

**Compound 13 ( $^1\text{H}$  NMR and  $^{13}\text{C}$  NMR,  $\text{CDCl}_3$ , 400 MHz and 101 MHz respectively)**

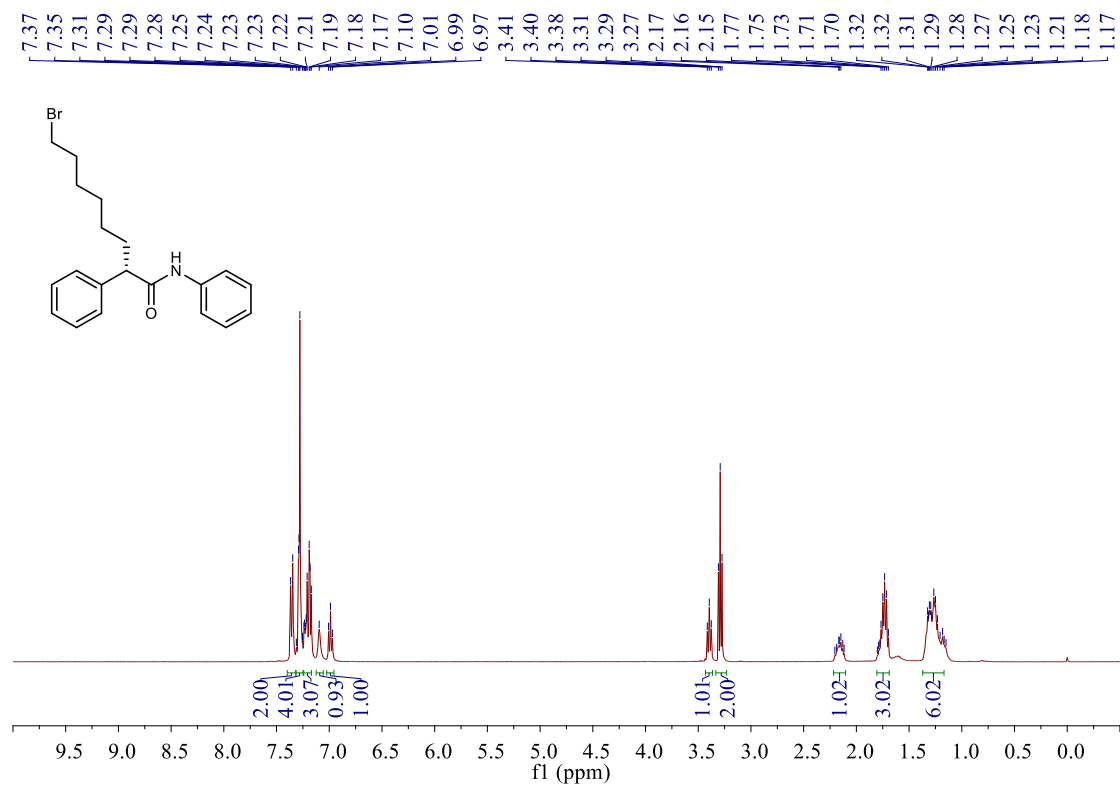

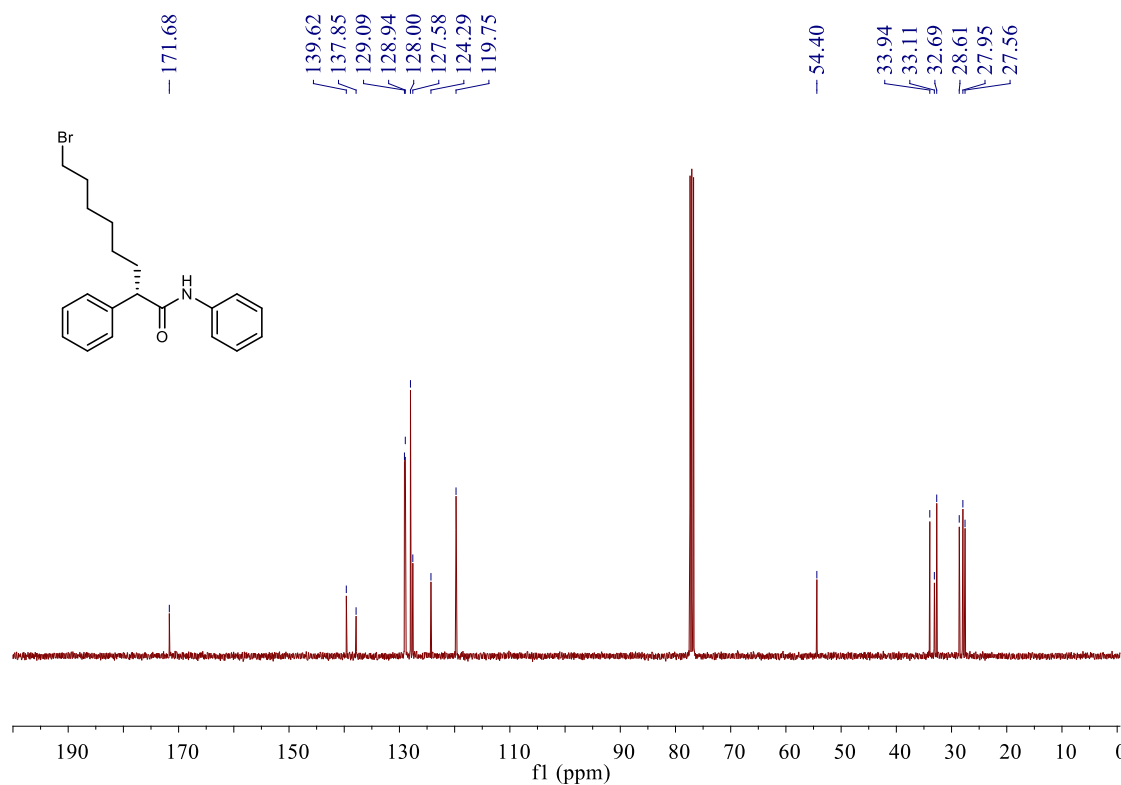

**Compound 14 (<sup>1</sup>H NMR and <sup>13</sup>C NMR, CDCl<sub>3</sub>, 400 MHz and 101 MHz respectively)**

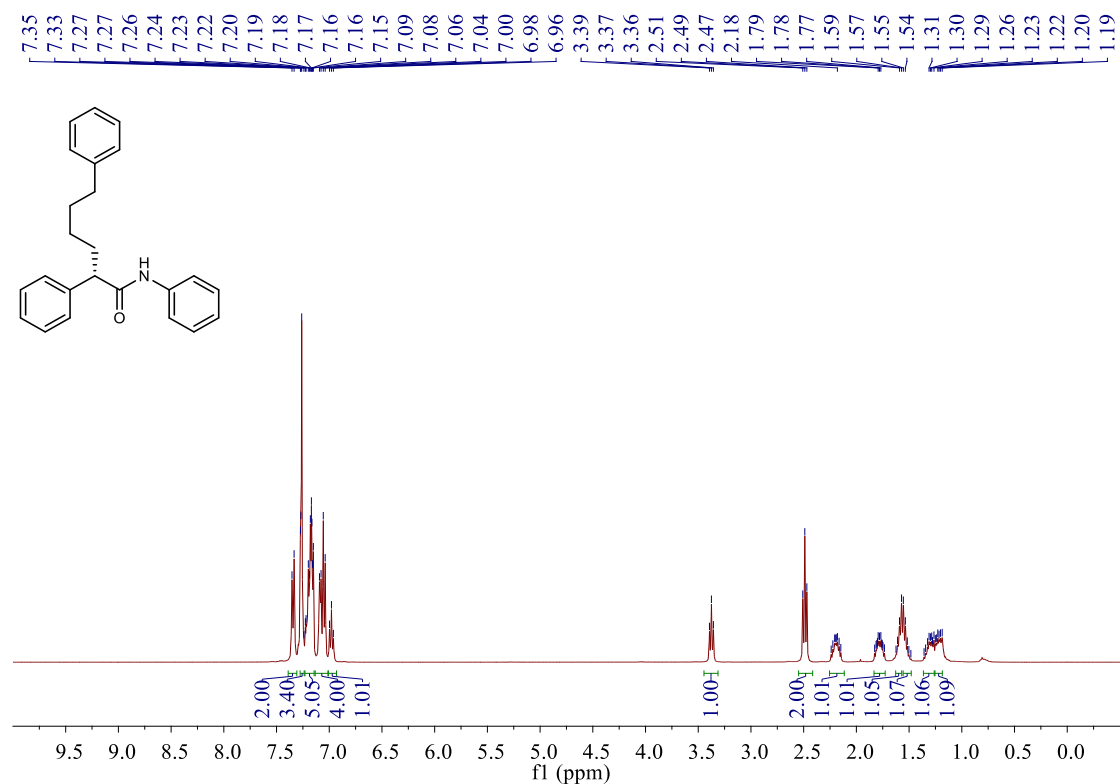

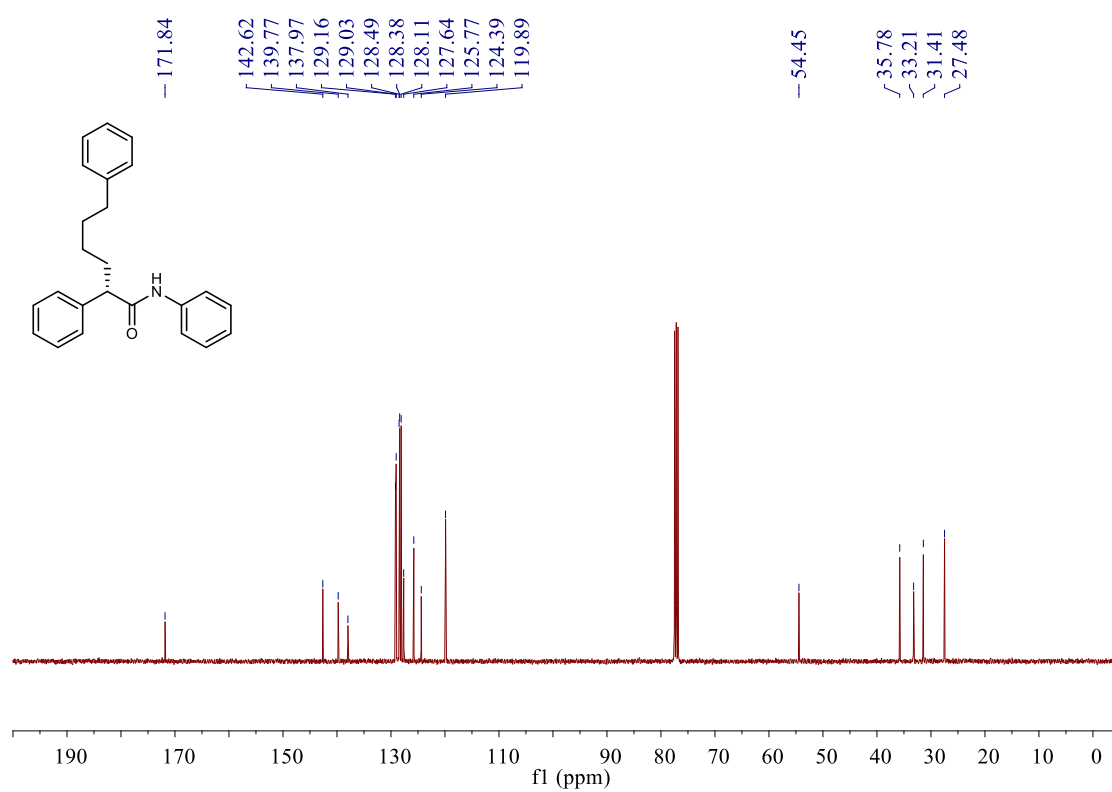

**Compound 15 (<sup>1</sup>H NMR and <sup>13</sup>C NMR, CDCl<sub>3</sub>, 400 MHz and 101 MHz respectively)**



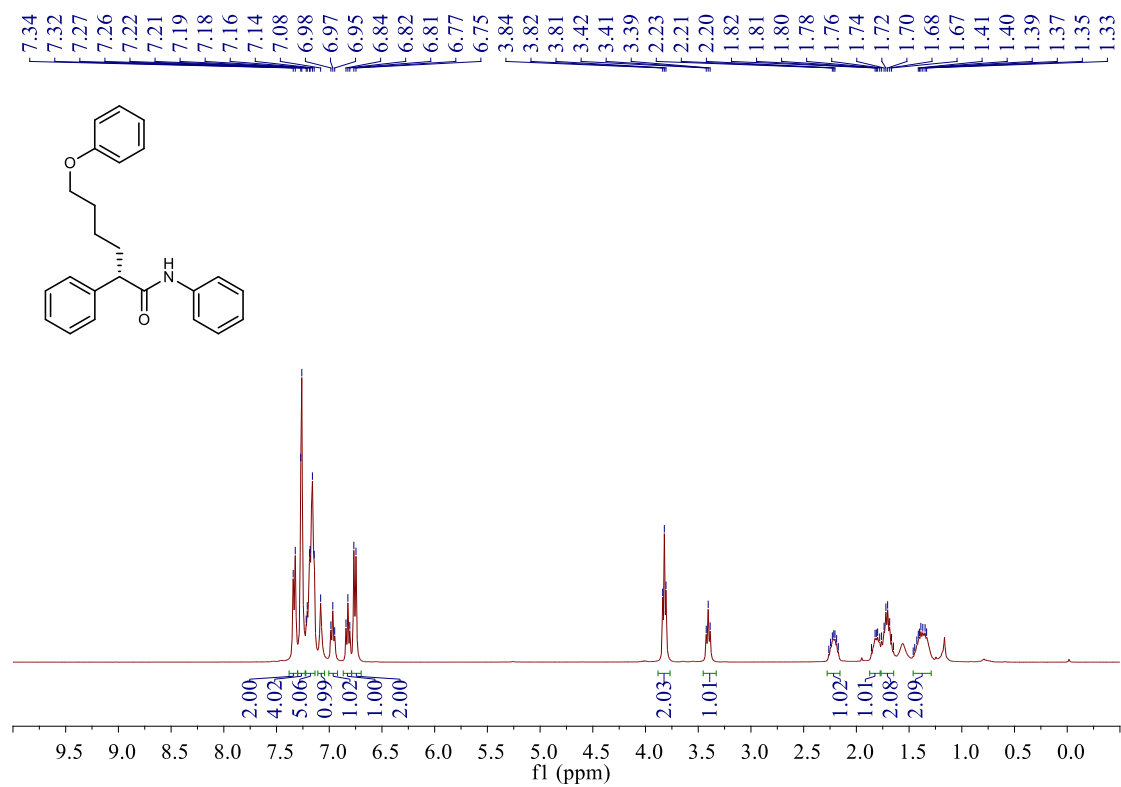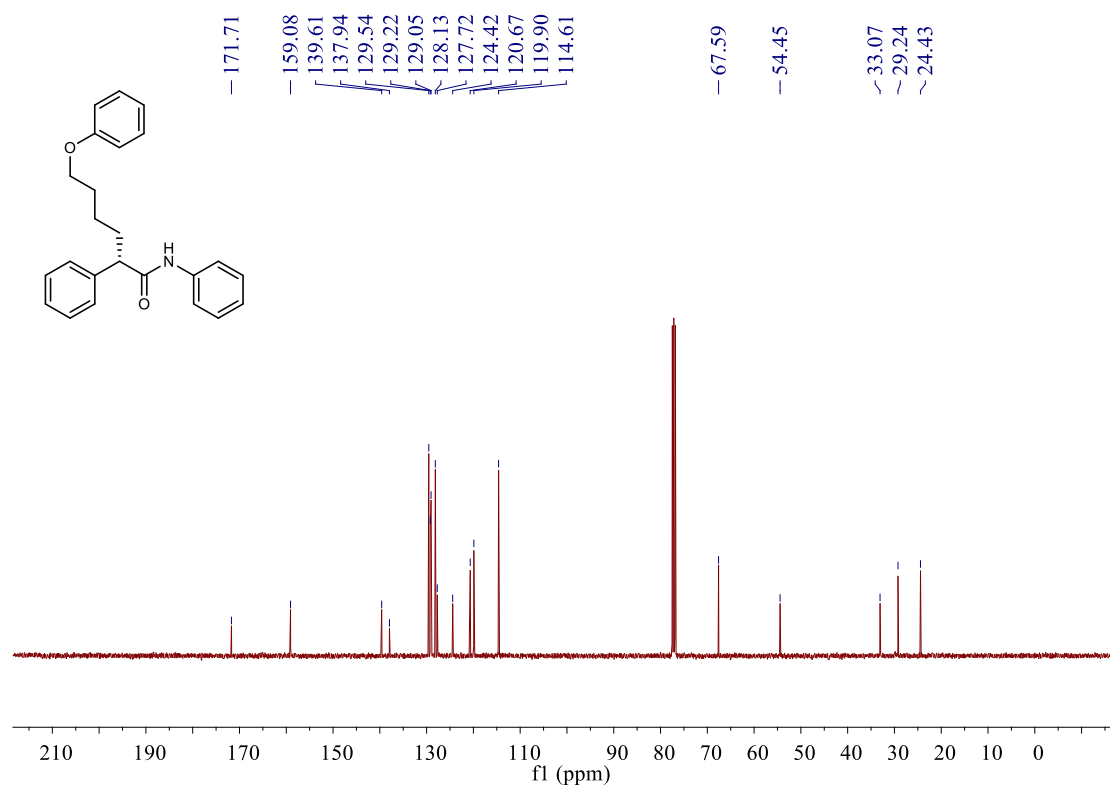

**Compound 16 (<sup>1</sup>H NMR and <sup>13</sup>C NMR, CDCl<sub>3</sub>, 400 MHz and 101 MHz respectively)**

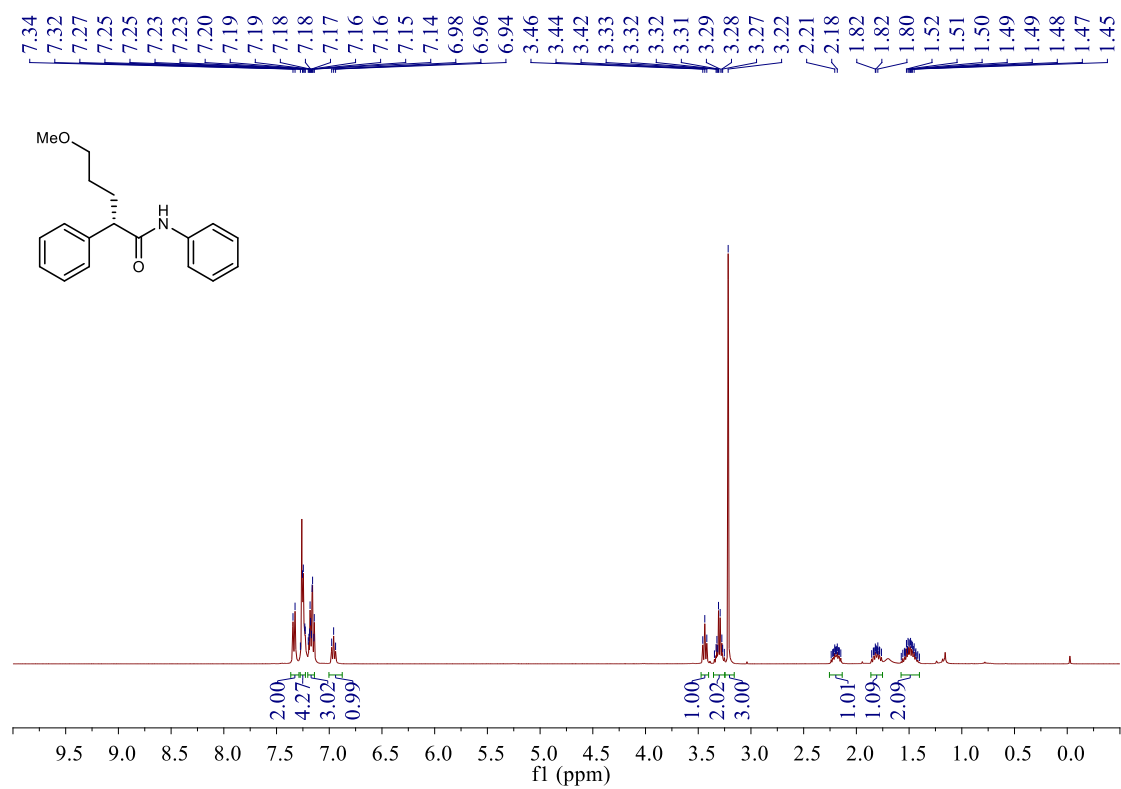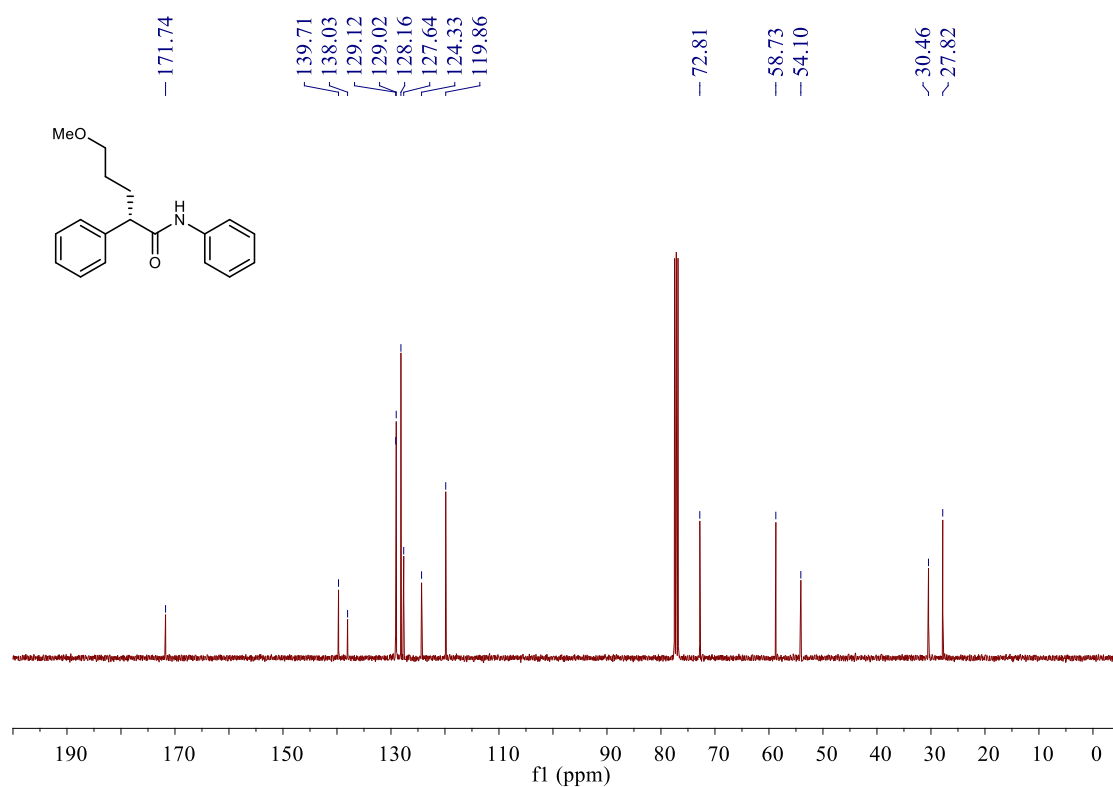

**Compound 17 ( $^1\text{H}$  NMR,  $^{13}\text{C}$  NMR and  $^{19}\text{F}$  NMR,  $\text{CDCl}_3$ , 400 MHz, 101 MHz and 377 MHz respectively)**

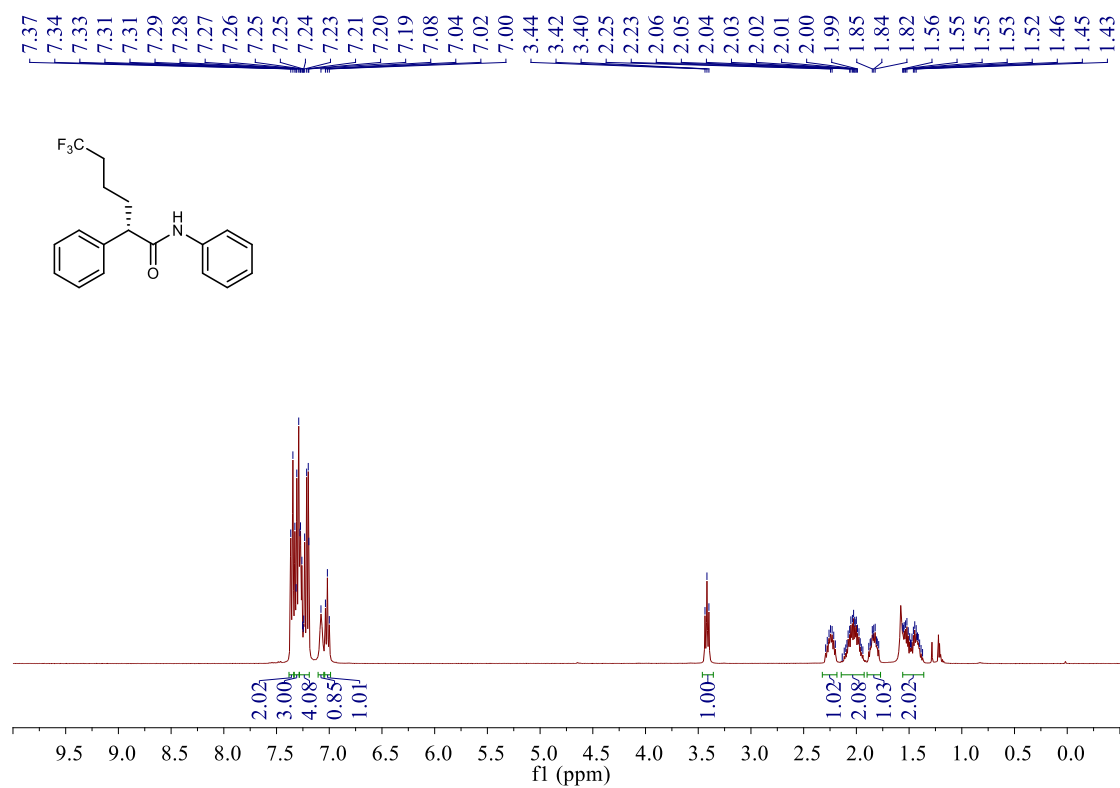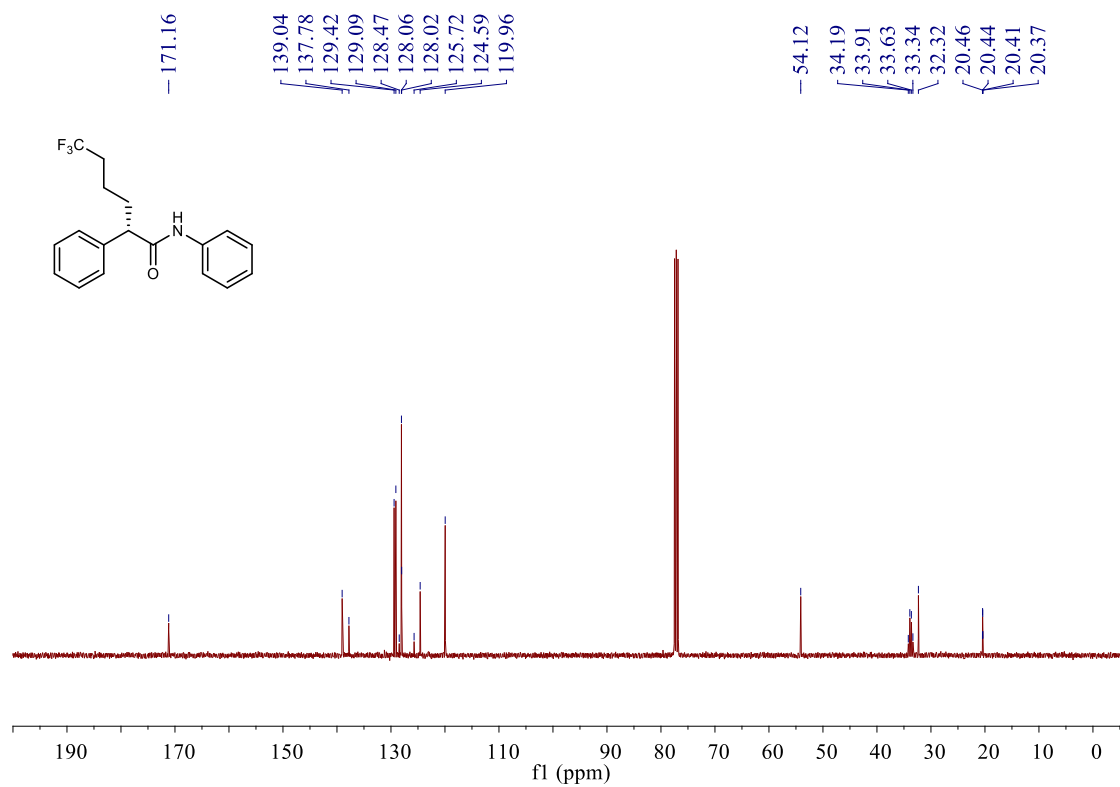

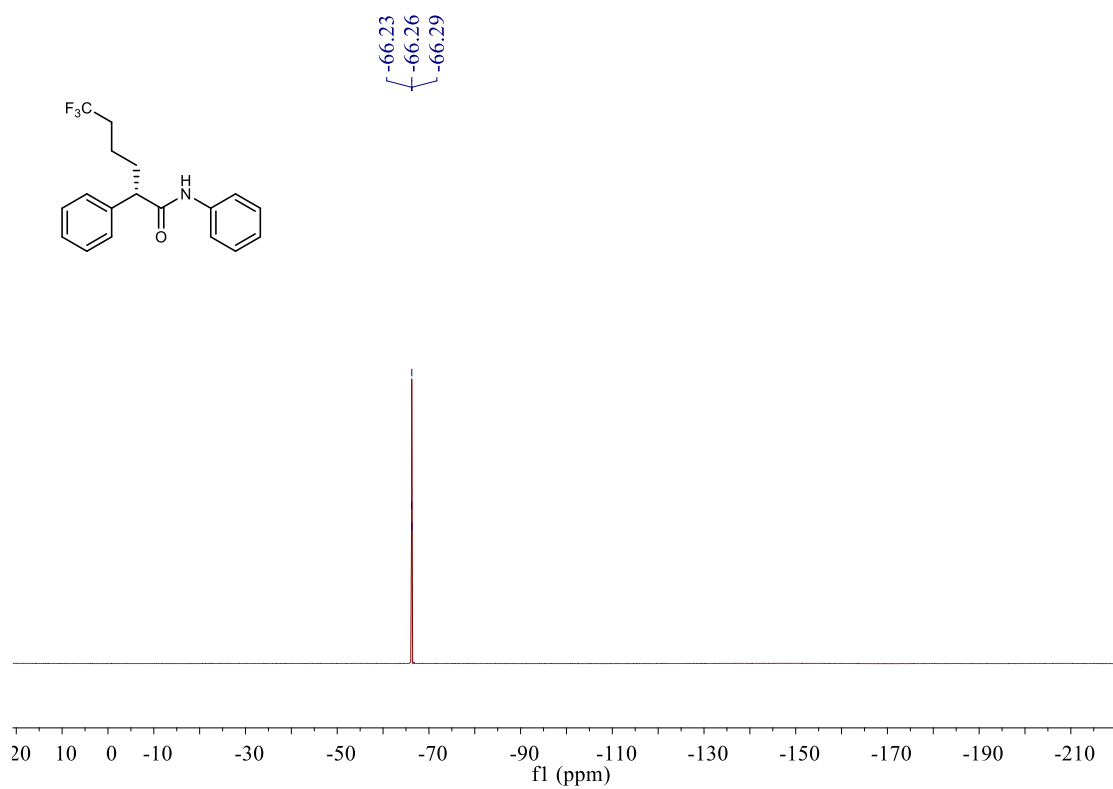

**Compound 18 (<sup>1</sup>H NMR and <sup>13</sup>C NMR, CDCl<sub>3</sub>, 400 MHz and 101 MHz respectively)**

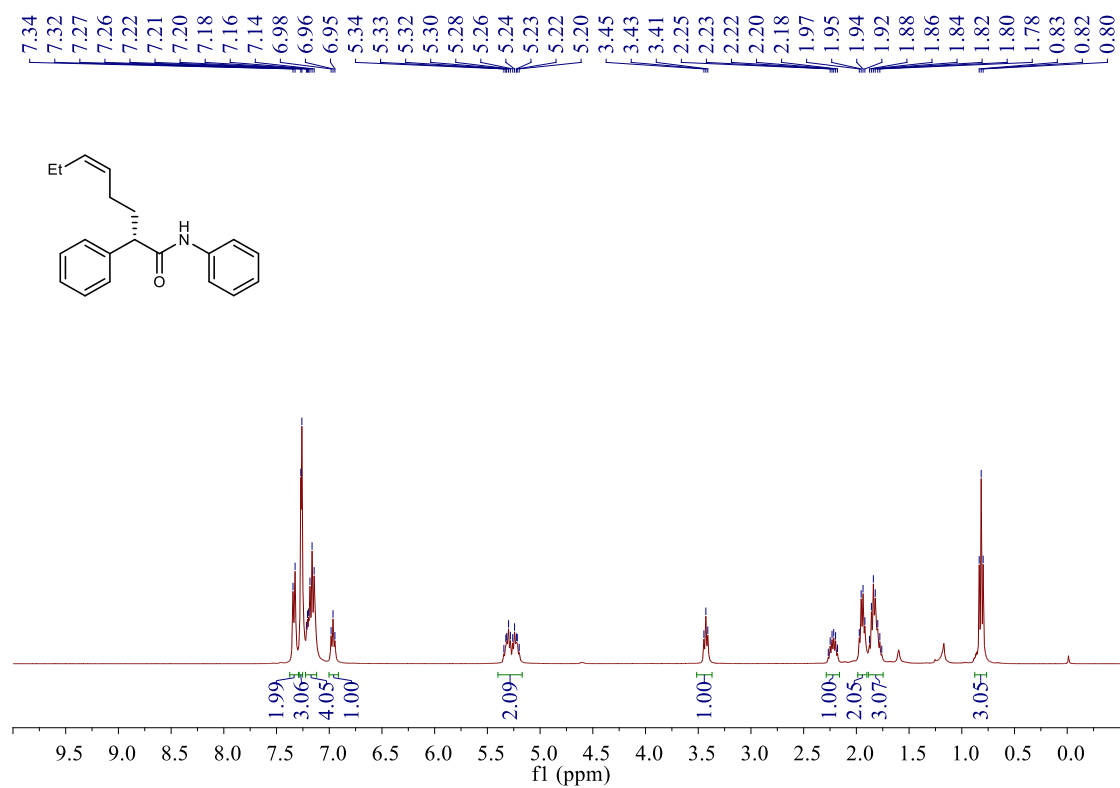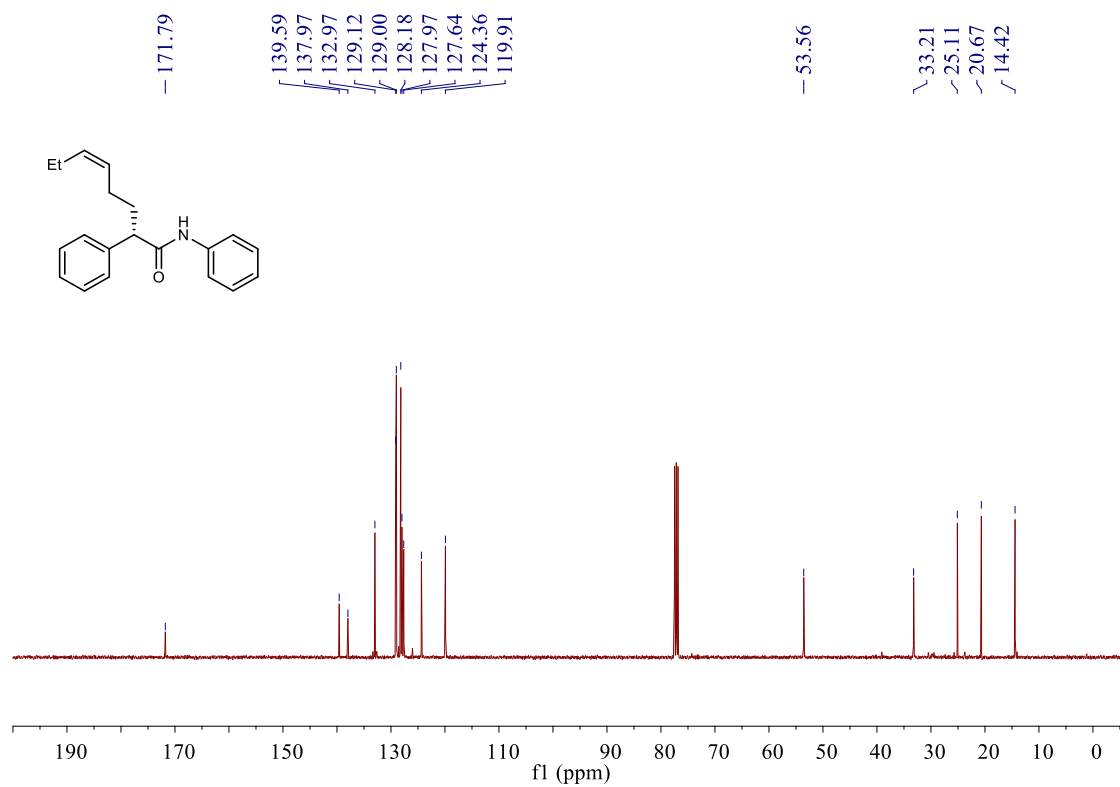

**Compound 19 ( $^1\text{H}$  NMR and  $^{13}\text{C}$  NMR,  $\text{CDCl}_3$ , 400 MHz and 101 MHz respectively)**

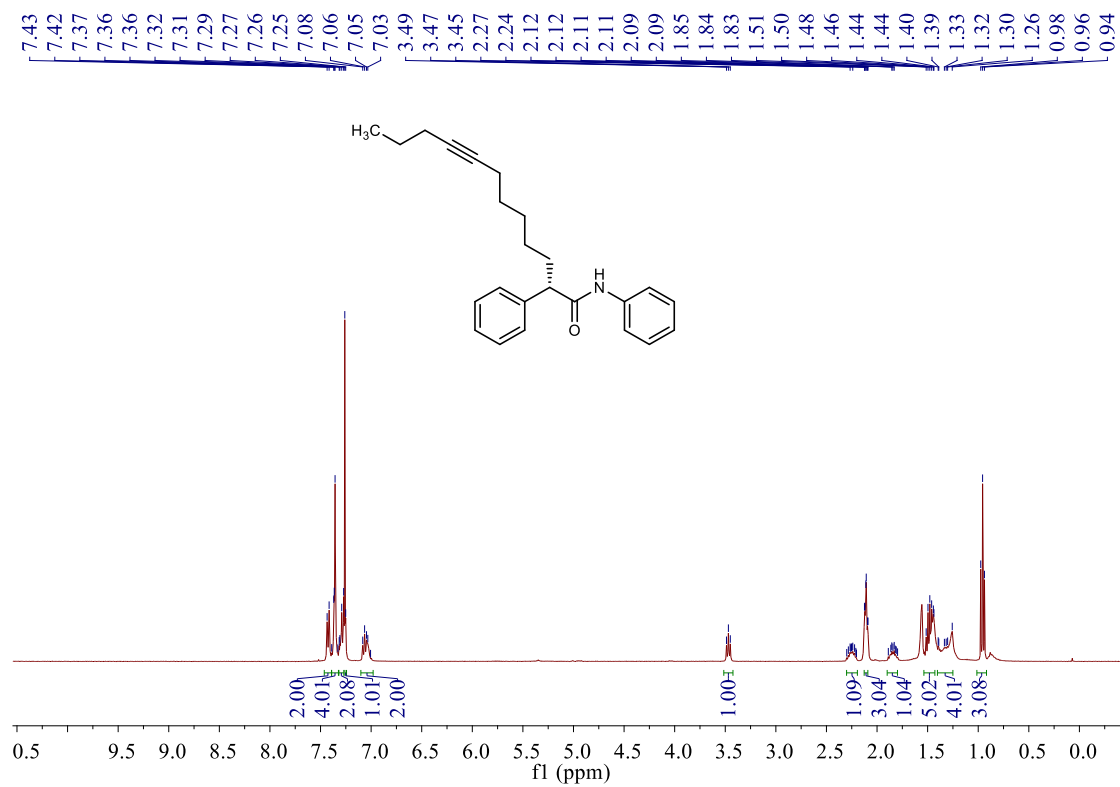

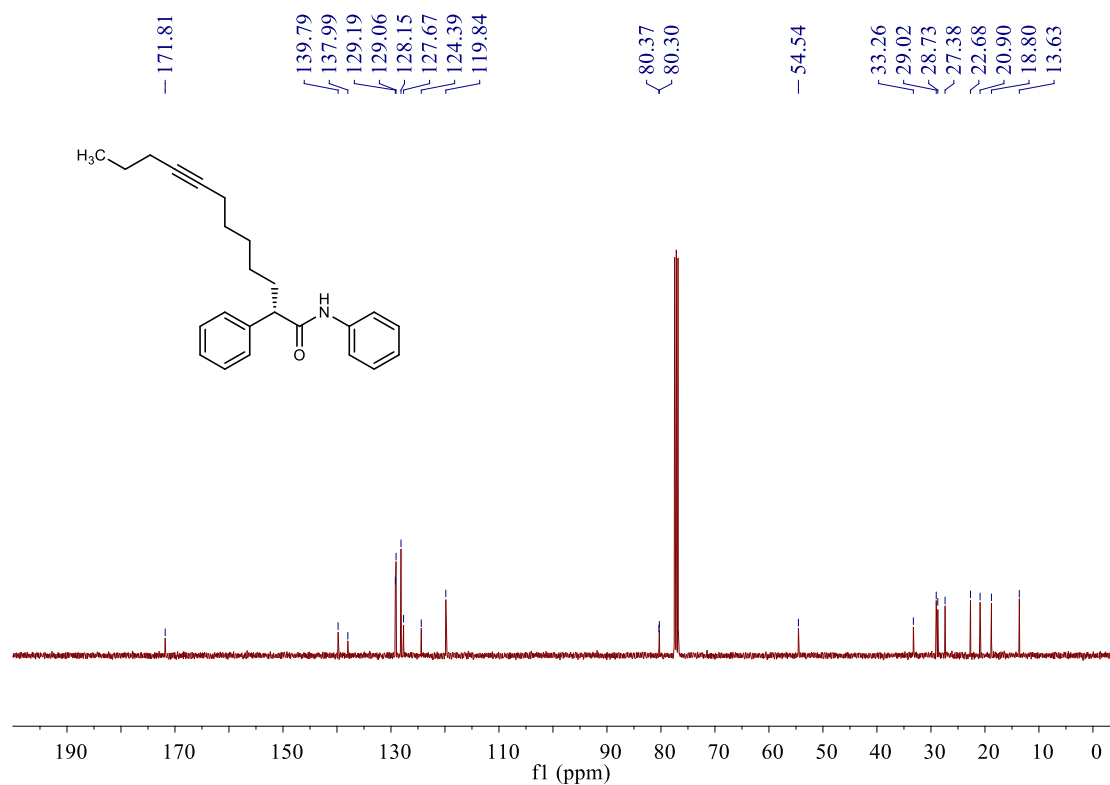

**Compound 20** ( $^1\text{H}$  NMR and  $^{13}\text{C}$  NMR,  $\text{CDCl}_3$ , 400 MHz and 101 MHz respectively)

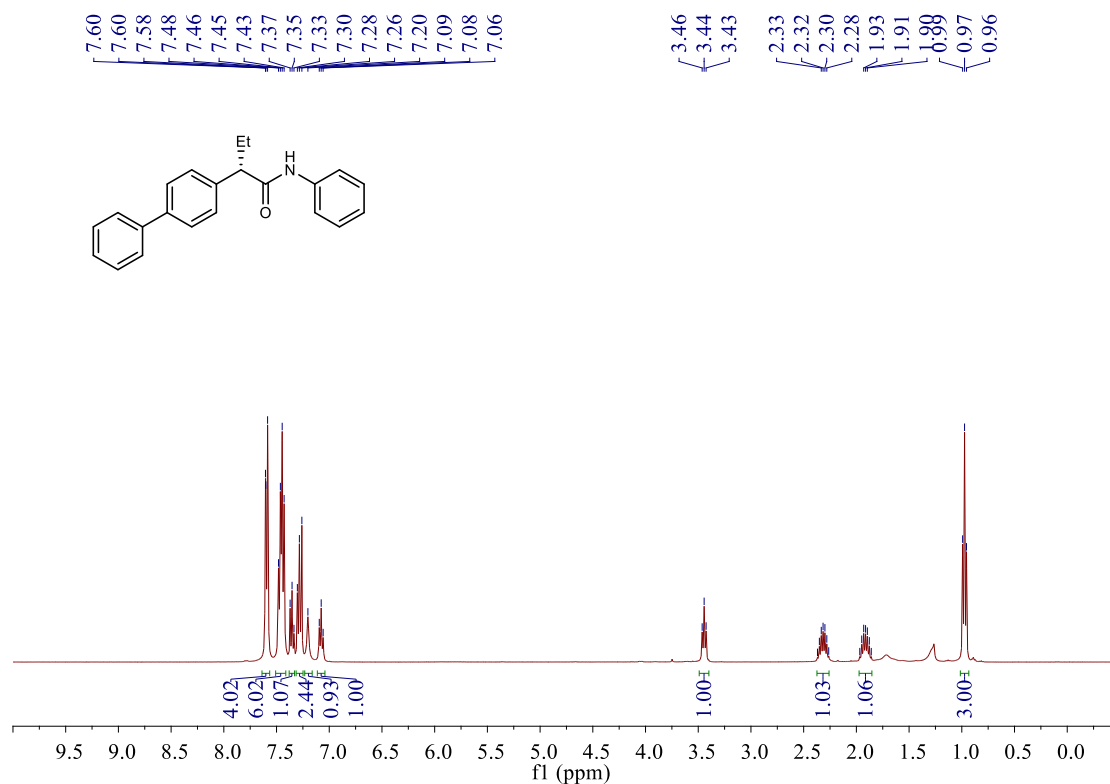

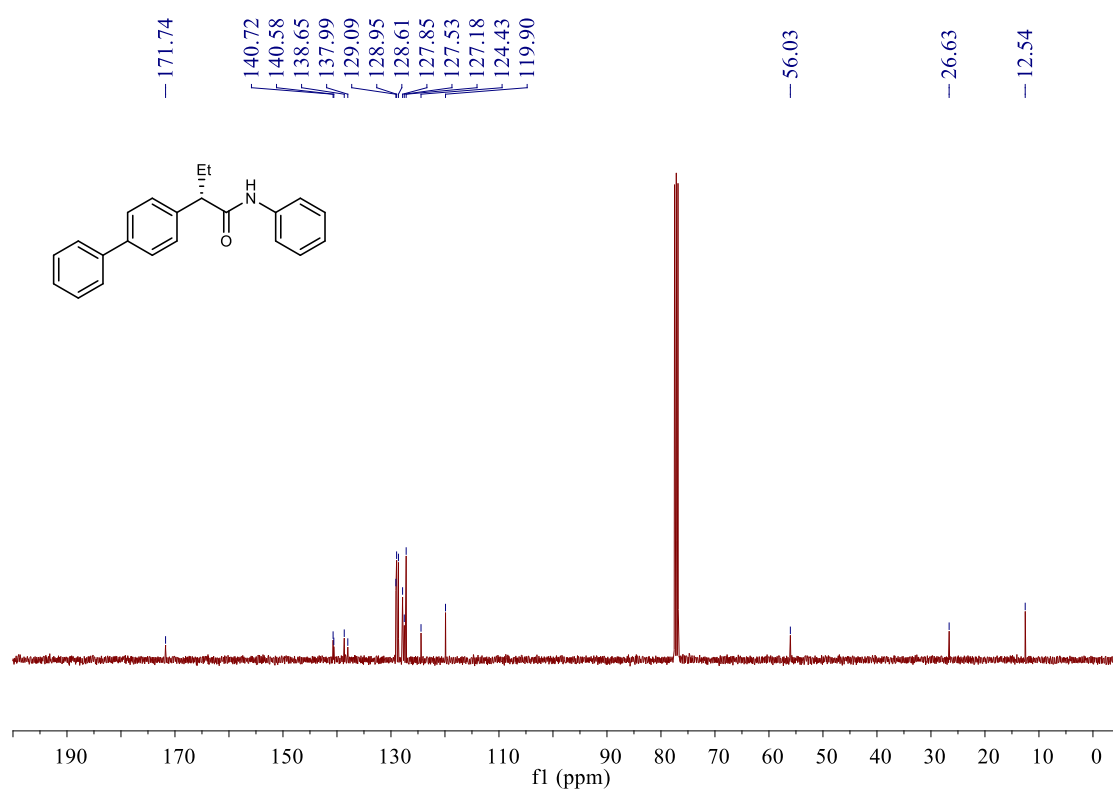

**Compound 21 (<sup>1</sup>H NMR, <sup>13</sup>C NMR and <sup>19</sup>F NMR, CDCl<sub>3</sub>, 400 MHz, 101 MHz and 377 MHz respectively)**



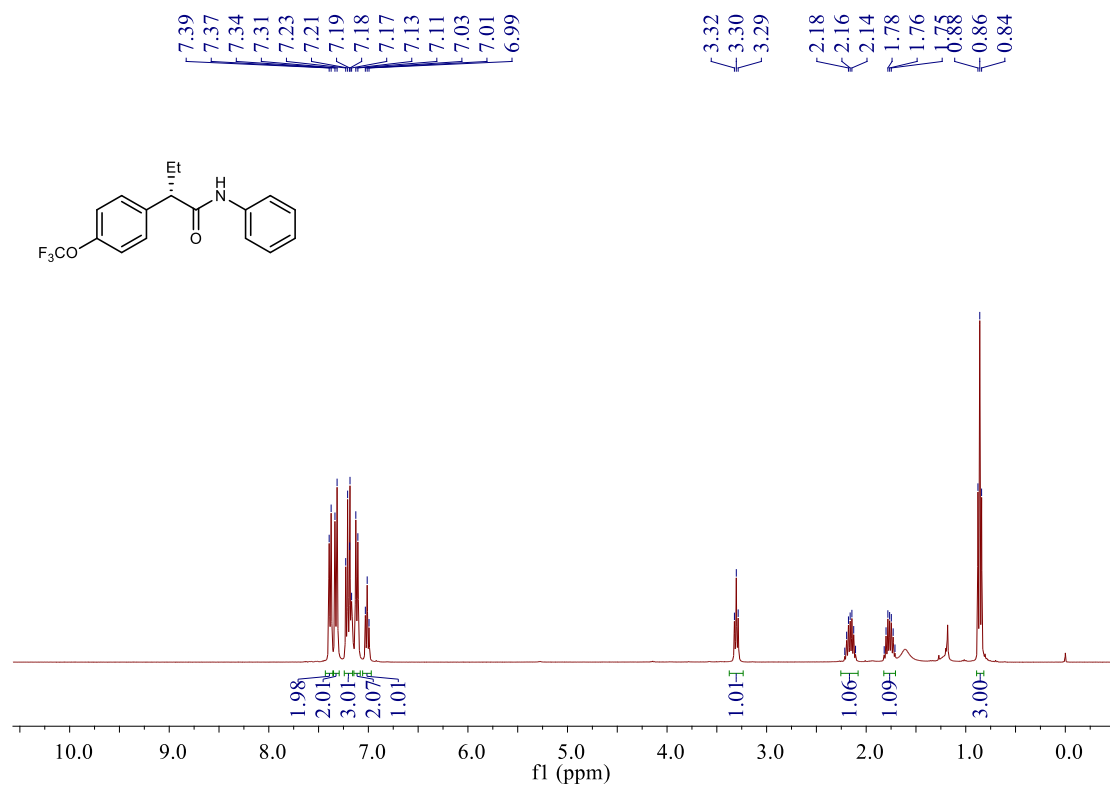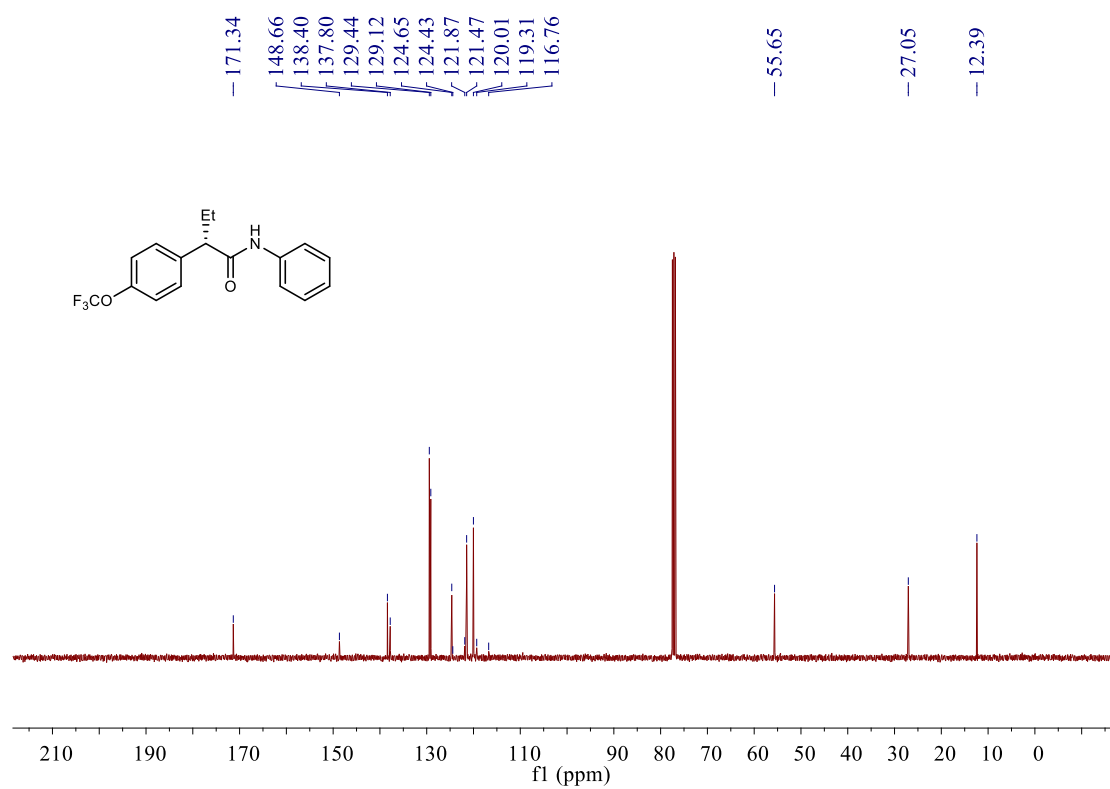

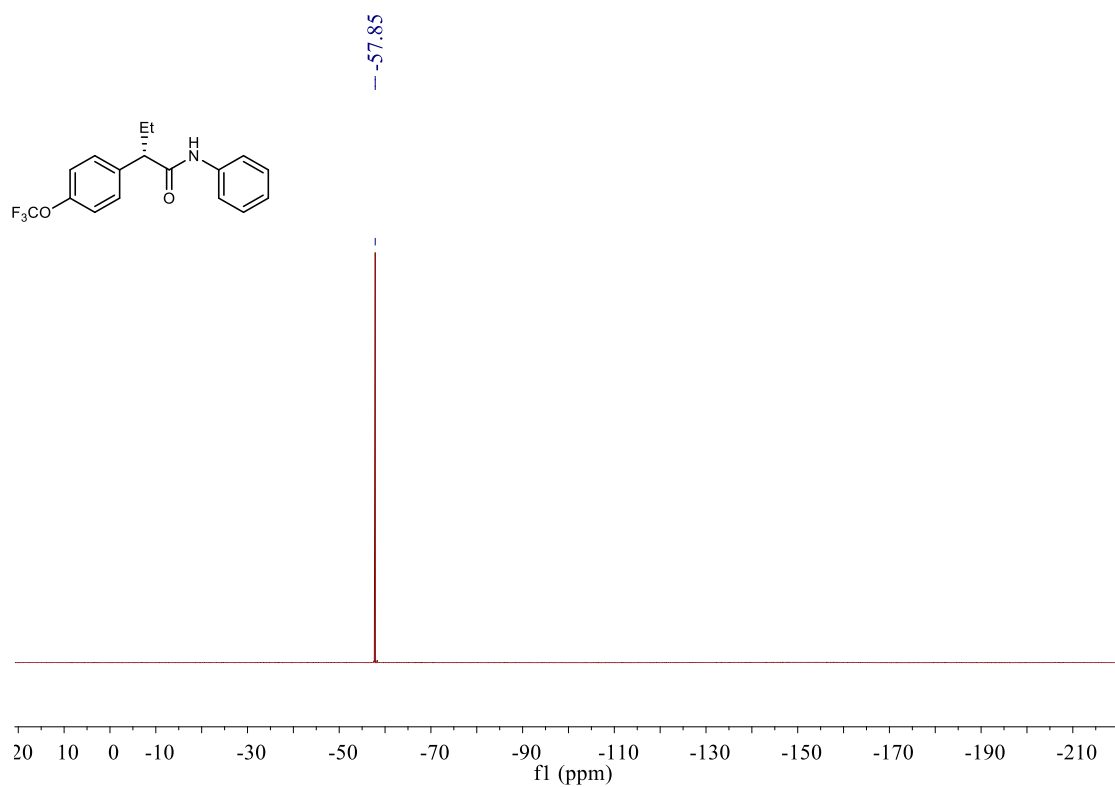

**Compound 22 ( $^1\text{H}$  NMR and  $^{13}\text{C}$  NMR,  $\text{CDCl}_3$ , 400 MHz and 101 MHz respectively)**

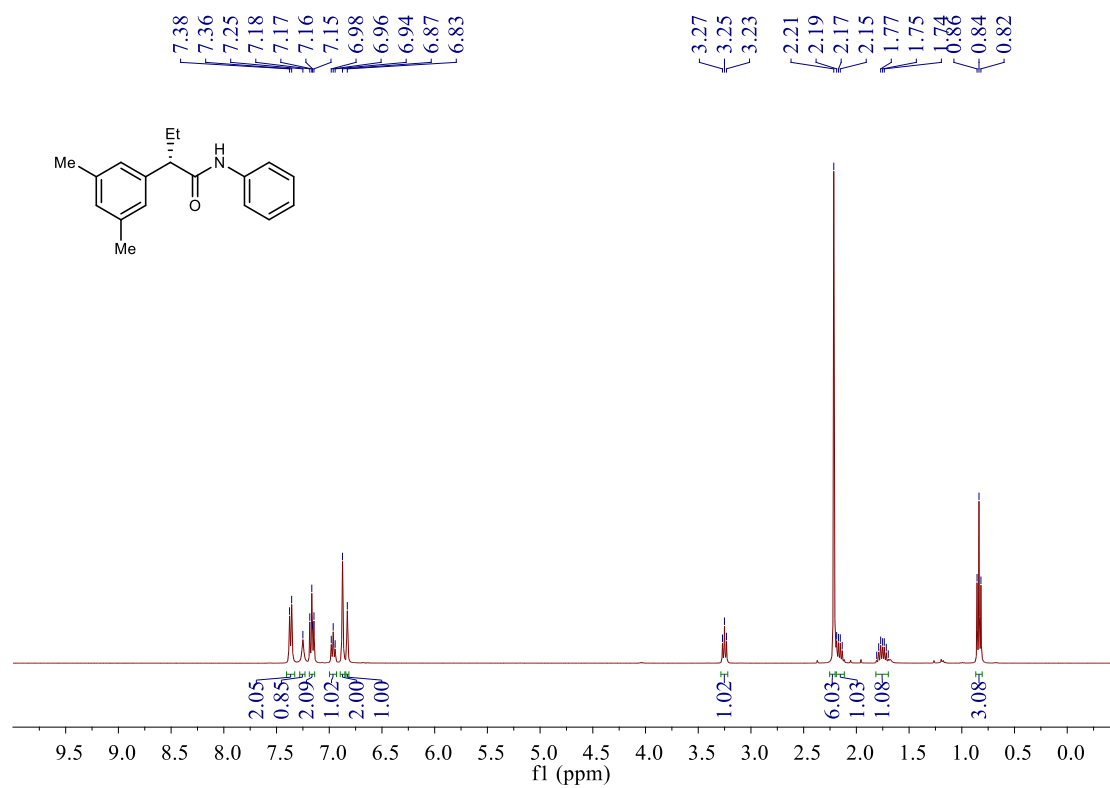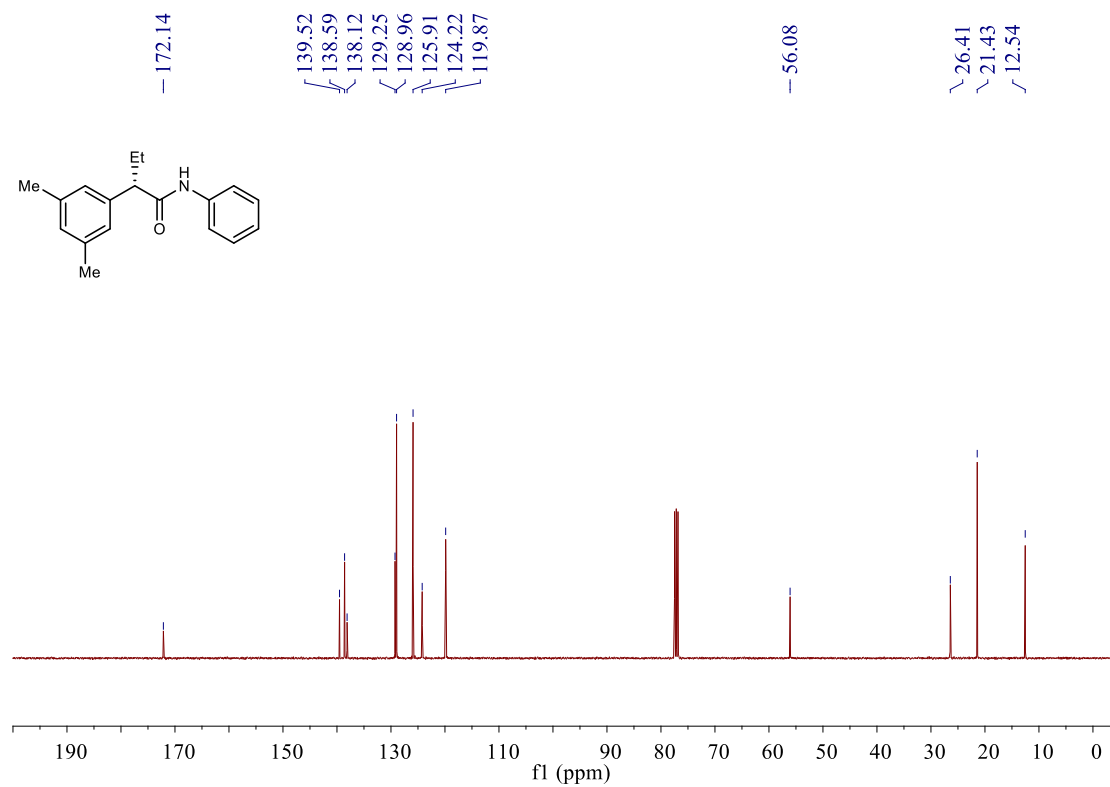

**Compound 23 ( $^1\text{H}$  NMR and  $^{13}\text{C}$  NMR,  $\text{CDCl}_3$ , 400 MHz and 101 MHz respectively)**

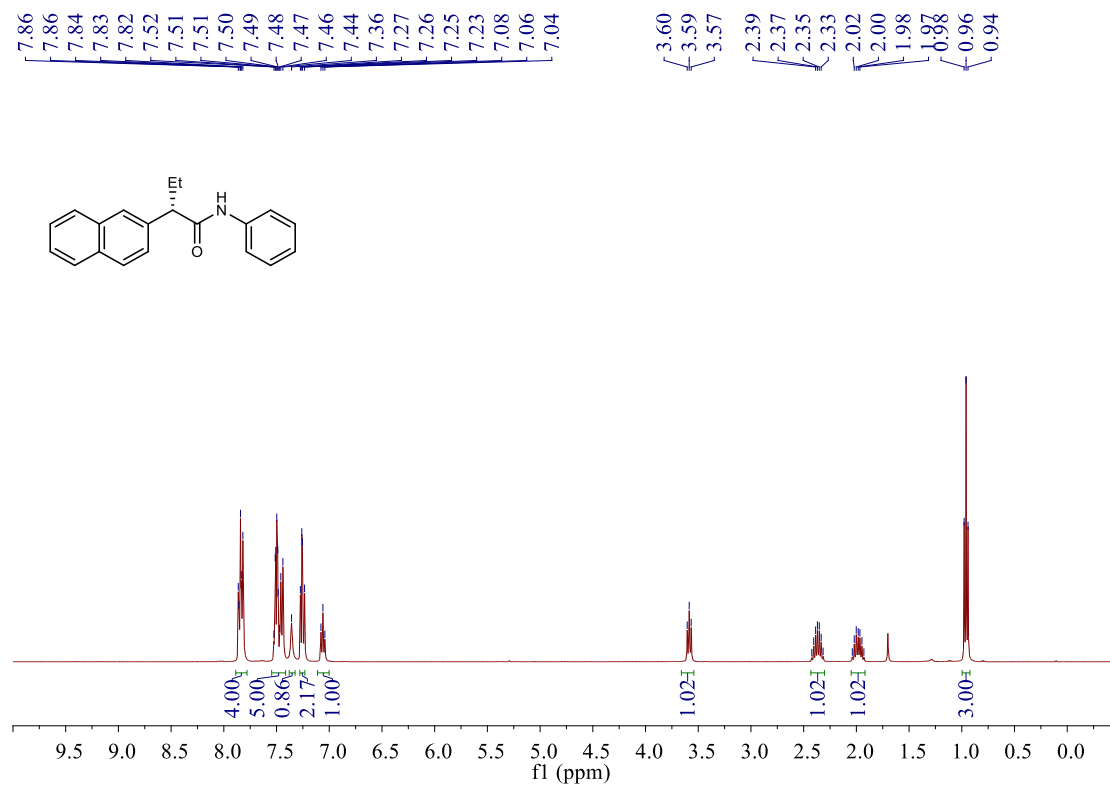

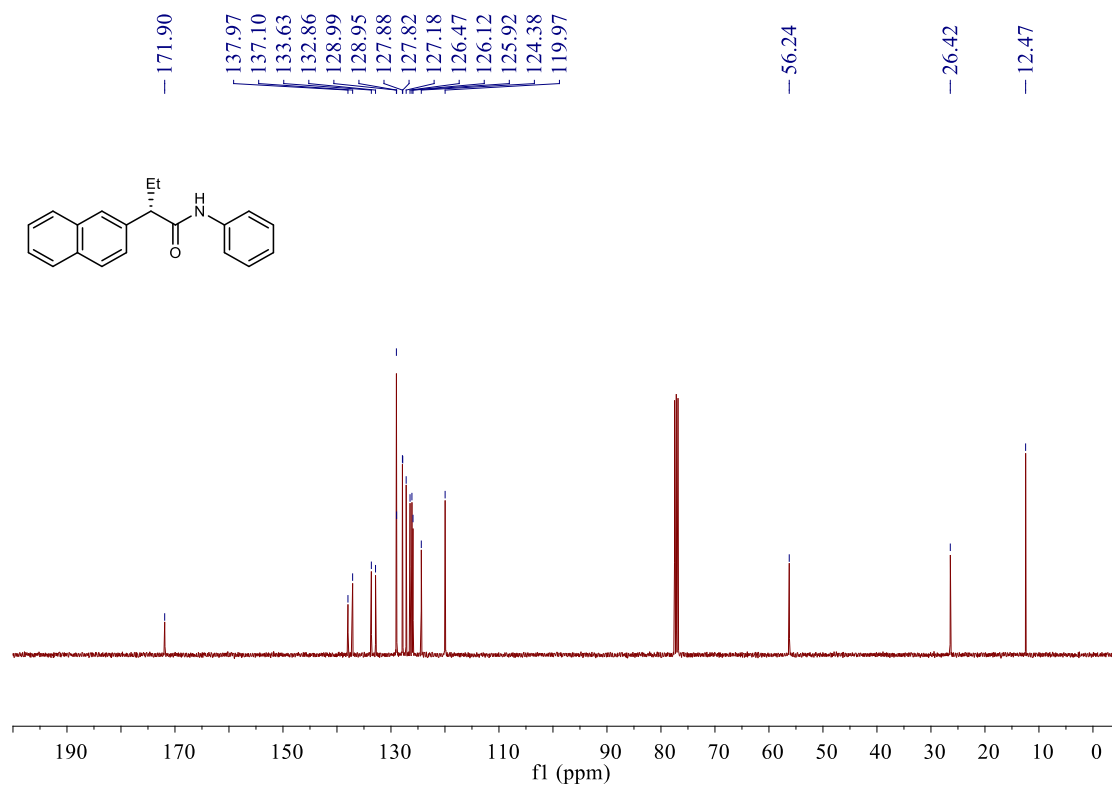

**Compound 24 ( $^1\text{H}$  NMR and  $^{13}\text{C}$  NMR,  $\text{CDCl}_3$ , 400 MHz and 101 MHz respectively)**

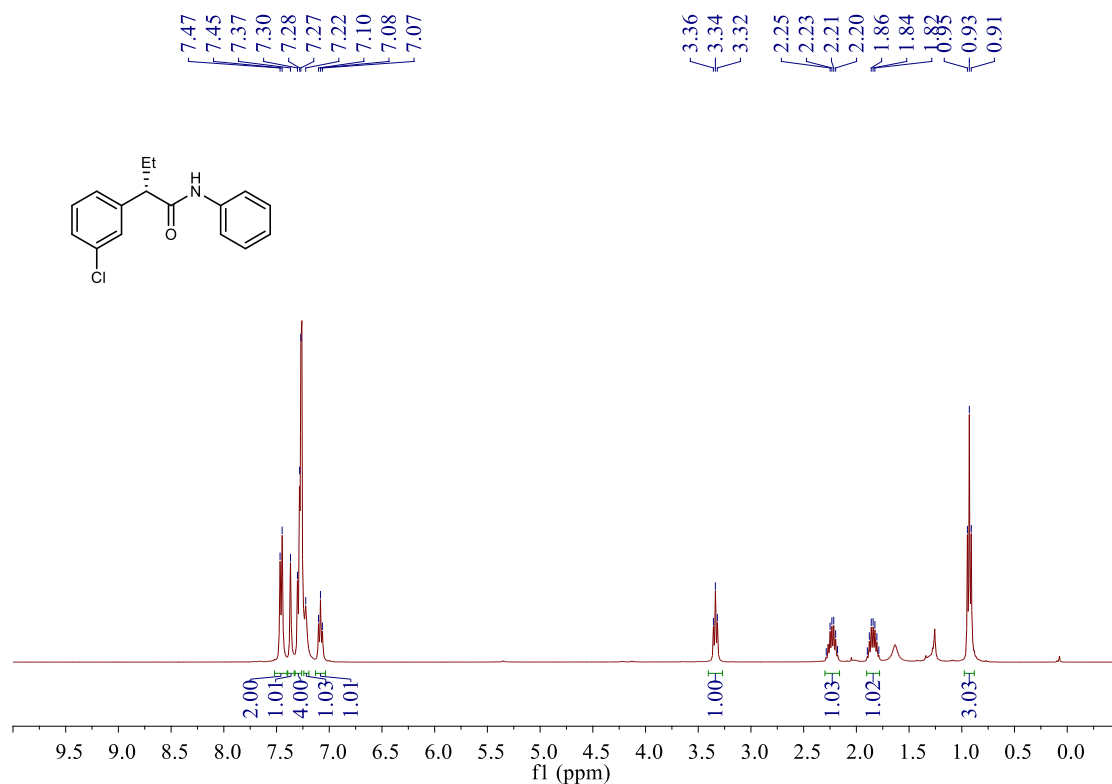

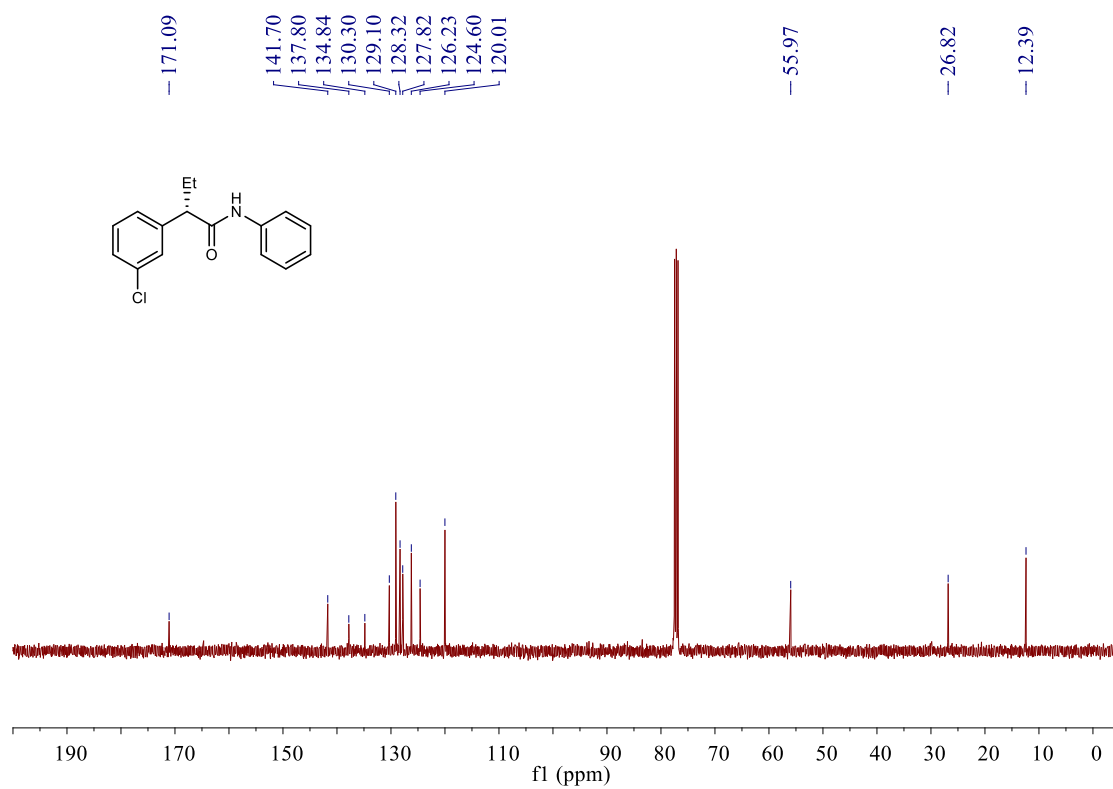

**Compound 25 (<sup>1</sup>H NMR and <sup>13</sup>C NMR, CDCl<sub>3</sub>, 400 MHz and 101 MHz respectively)**

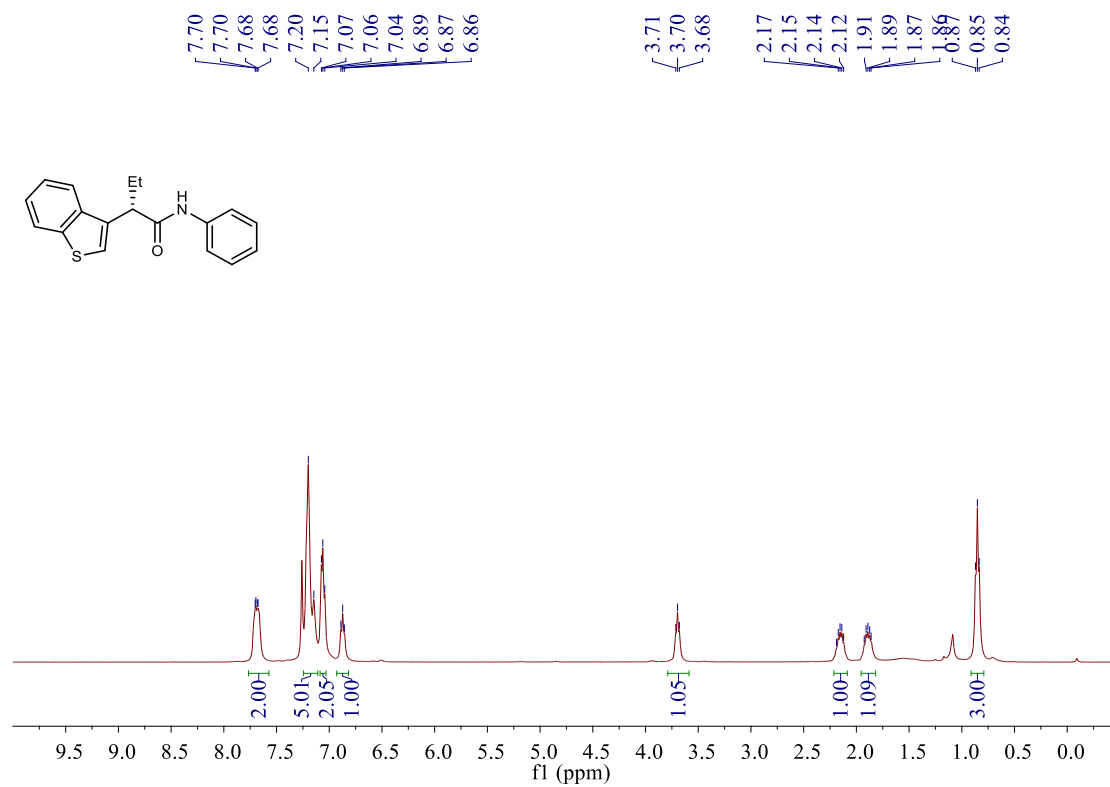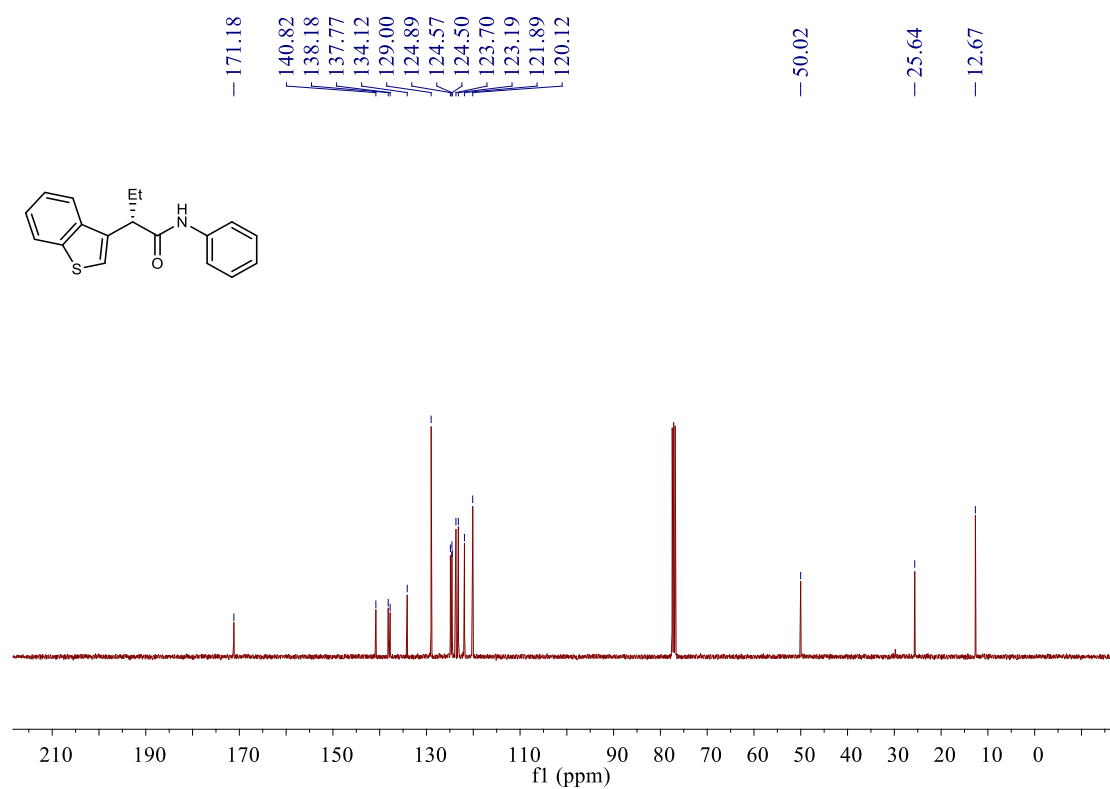

**Compound 26 (<sup>1</sup>H NMR and <sup>13</sup>C NMR, CDCl<sub>3</sub>, 400 MHz and 101 MHz respectively)**

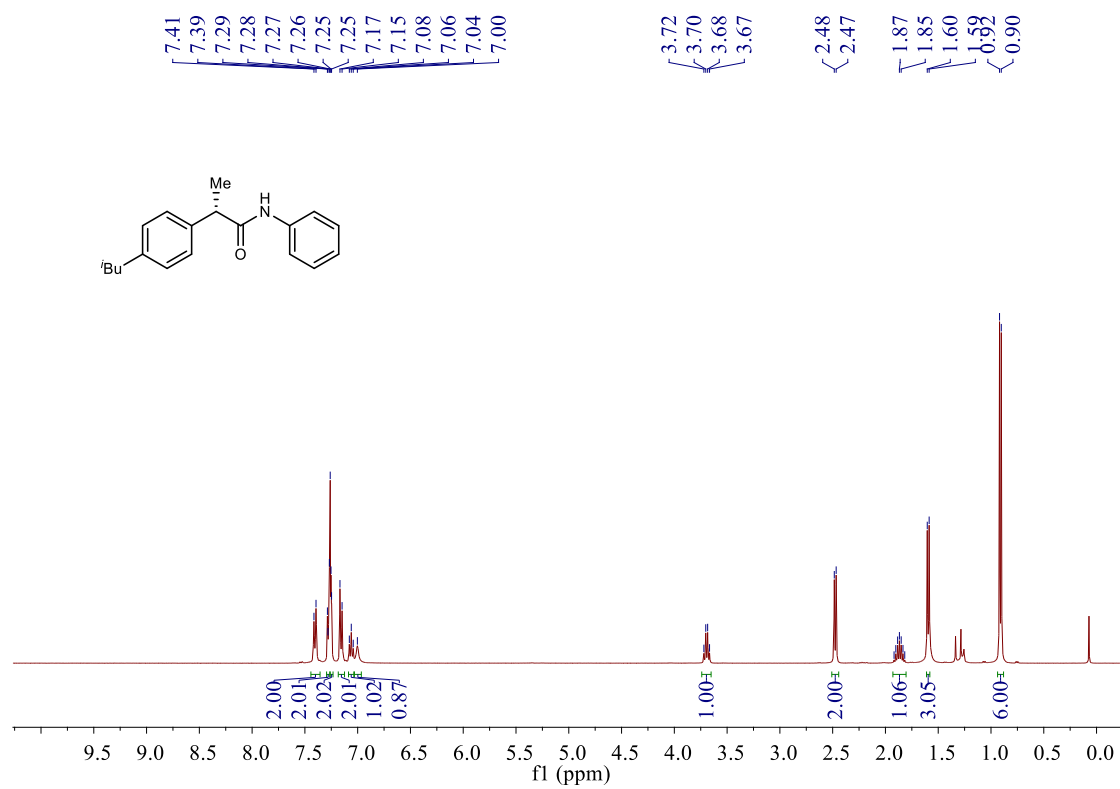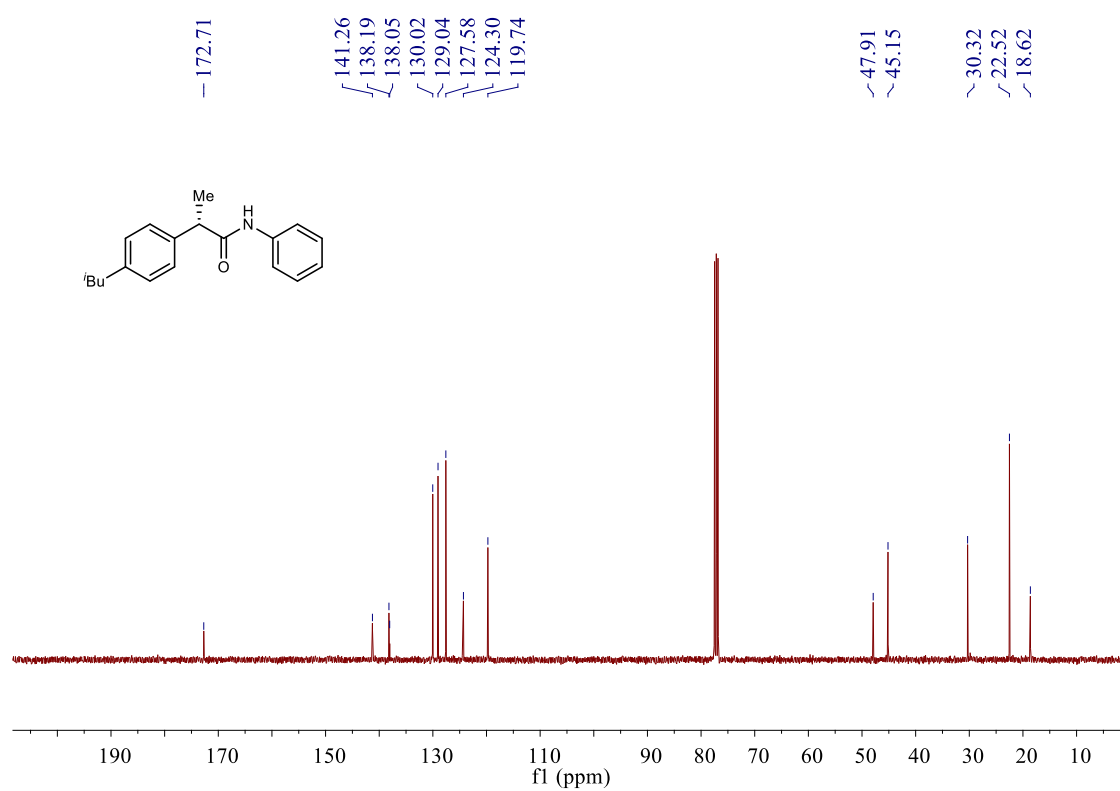



**Compound 27 ( $^1\text{H}$  NMR and  $^{13}\text{C}$  NMR,  $\text{CDCl}_3$ , 400 MHz and 101 MHz respectively)**

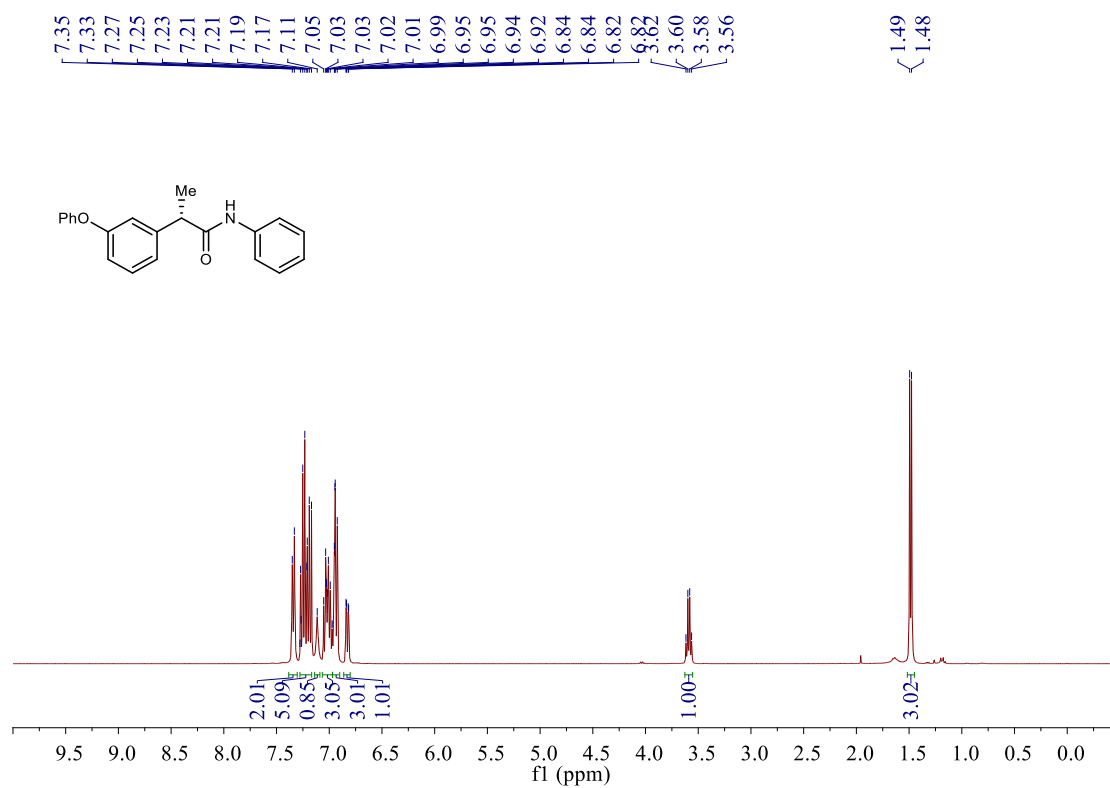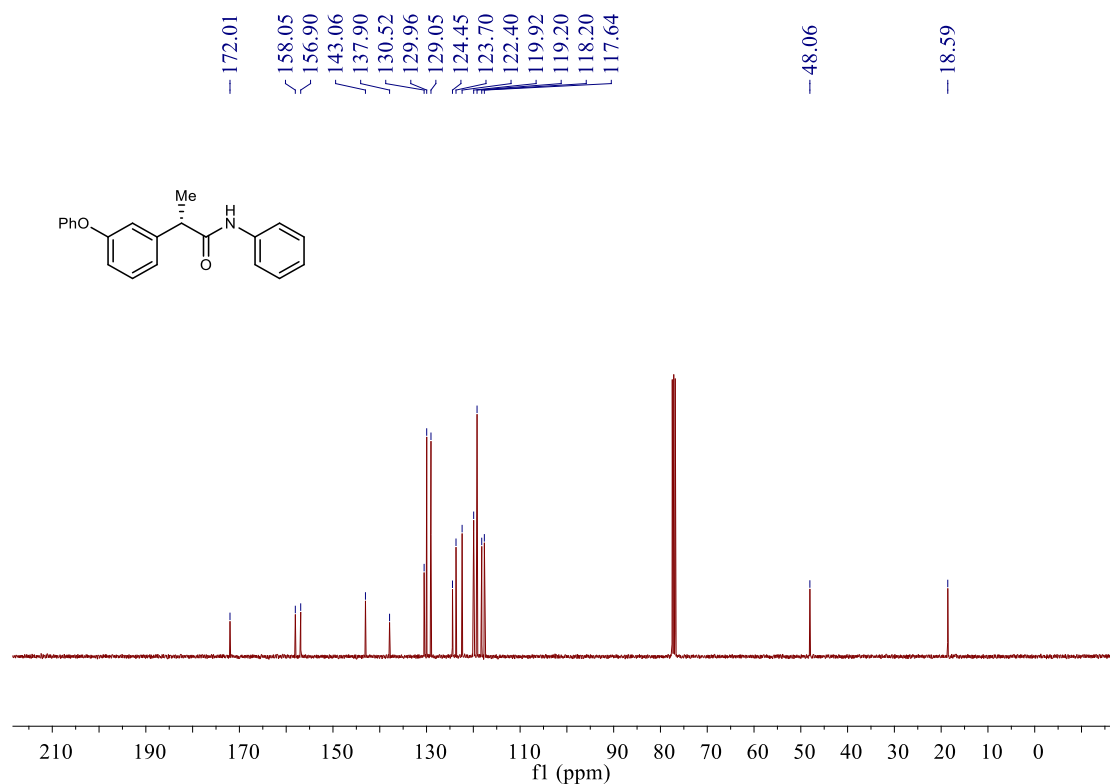

**Compound 28 ( $^1\text{H}$  NMR,  $^{13}\text{C}$  NMR and  $^{19}\text{F}$  NMR,  $\text{CDCl}_3$ , 400 MHz, 101 MHz and 377 MHz respectively)**

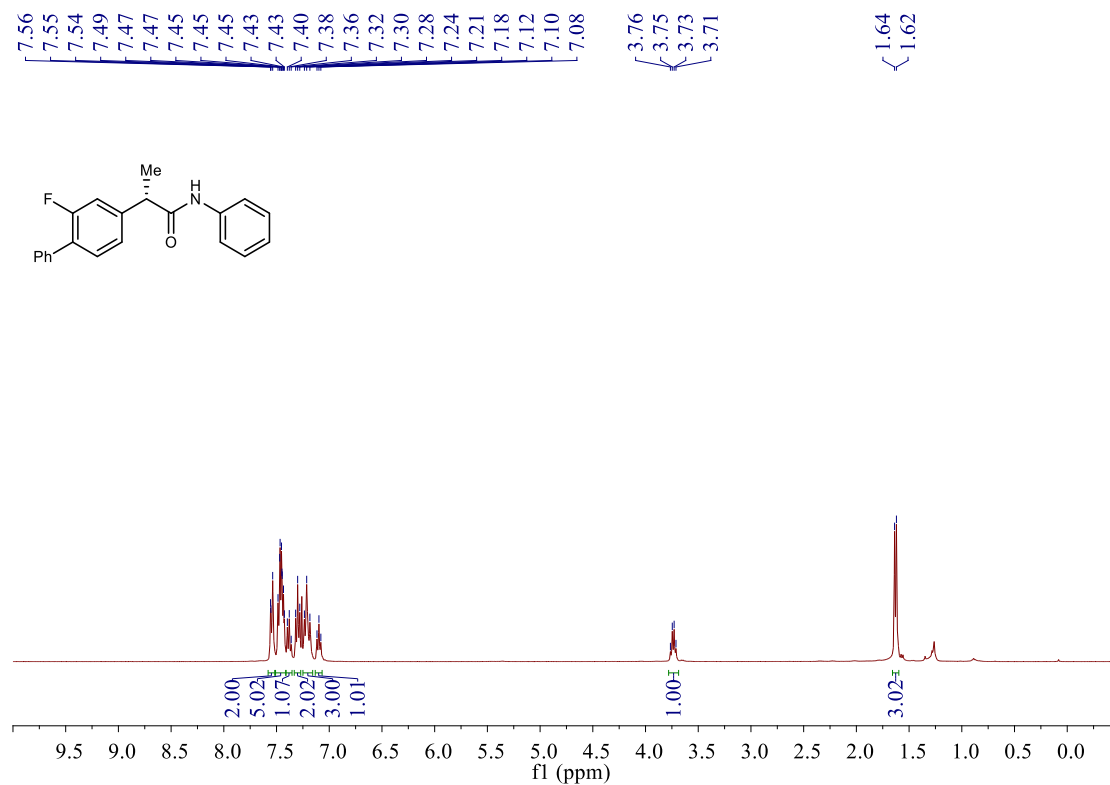

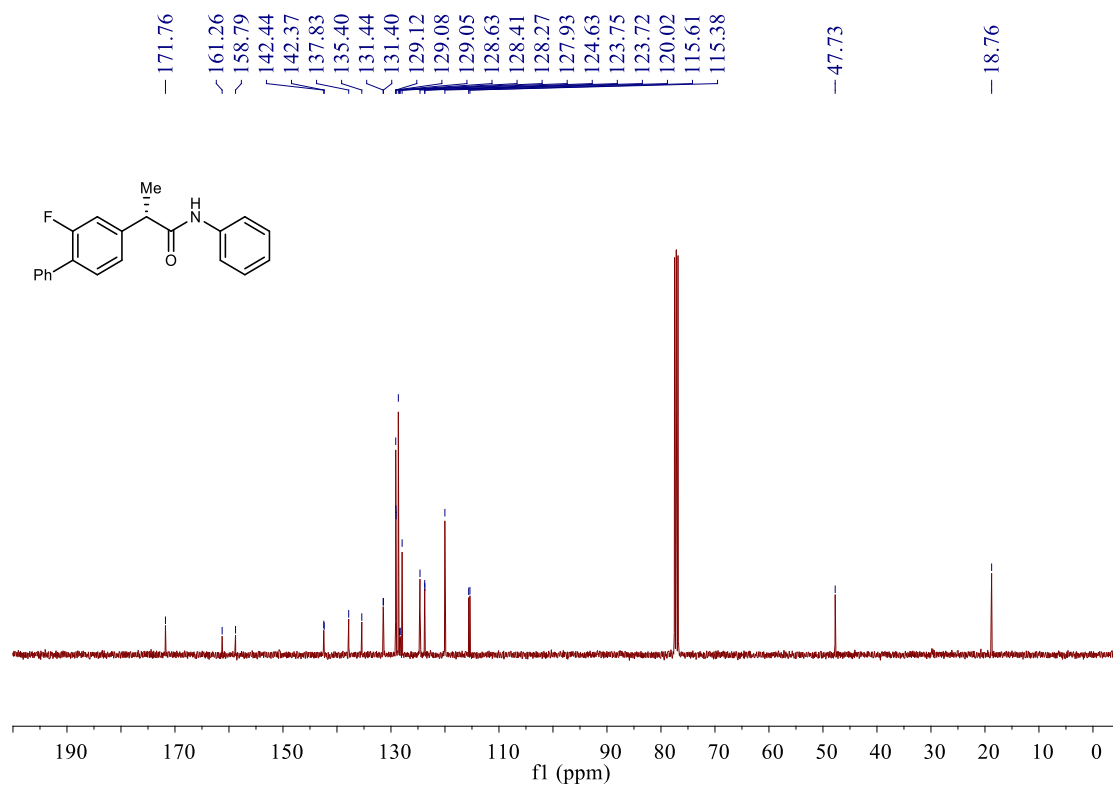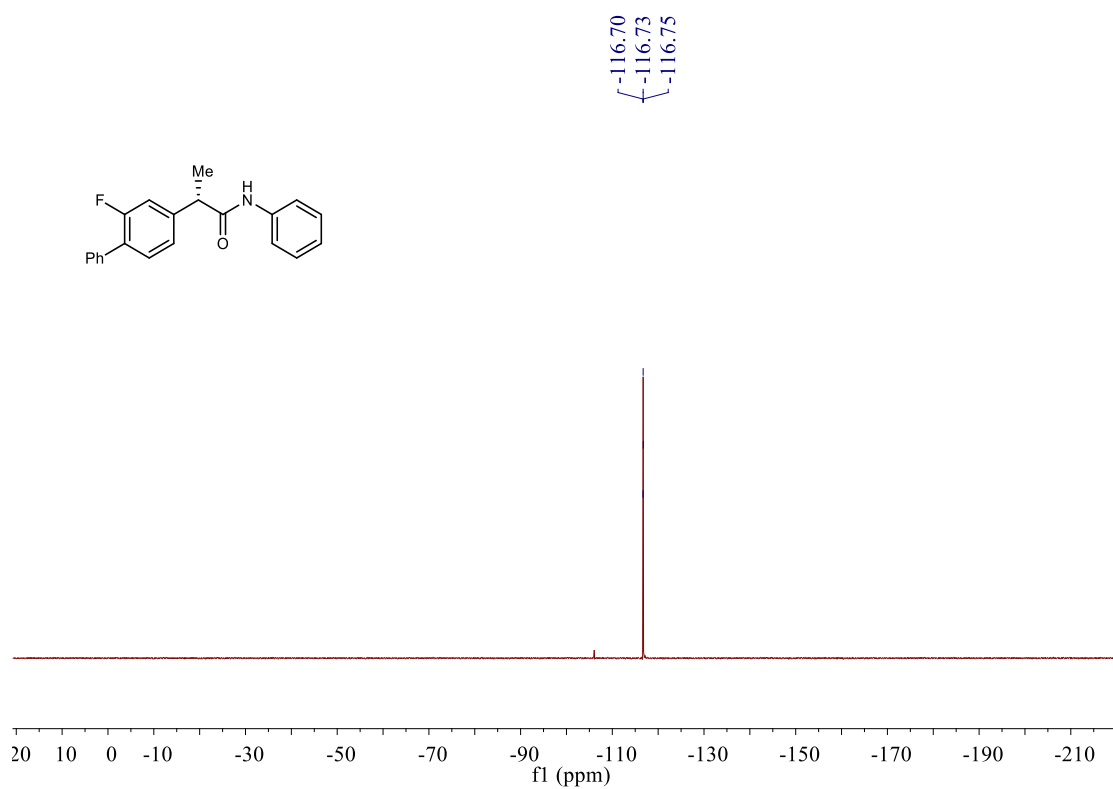

**Compound 29 (<sup>1</sup>H NMR and <sup>13</sup>C NMR, CDCl<sub>3</sub>, 400 MHz and 101 MHz respectively)**

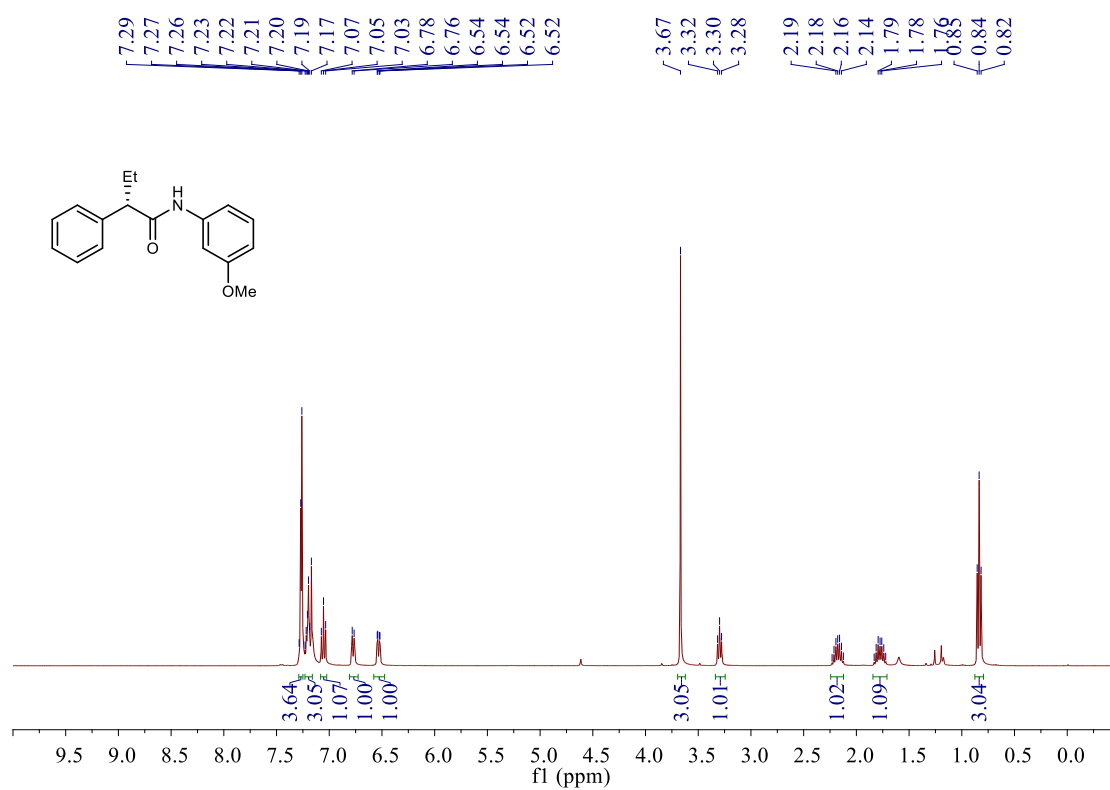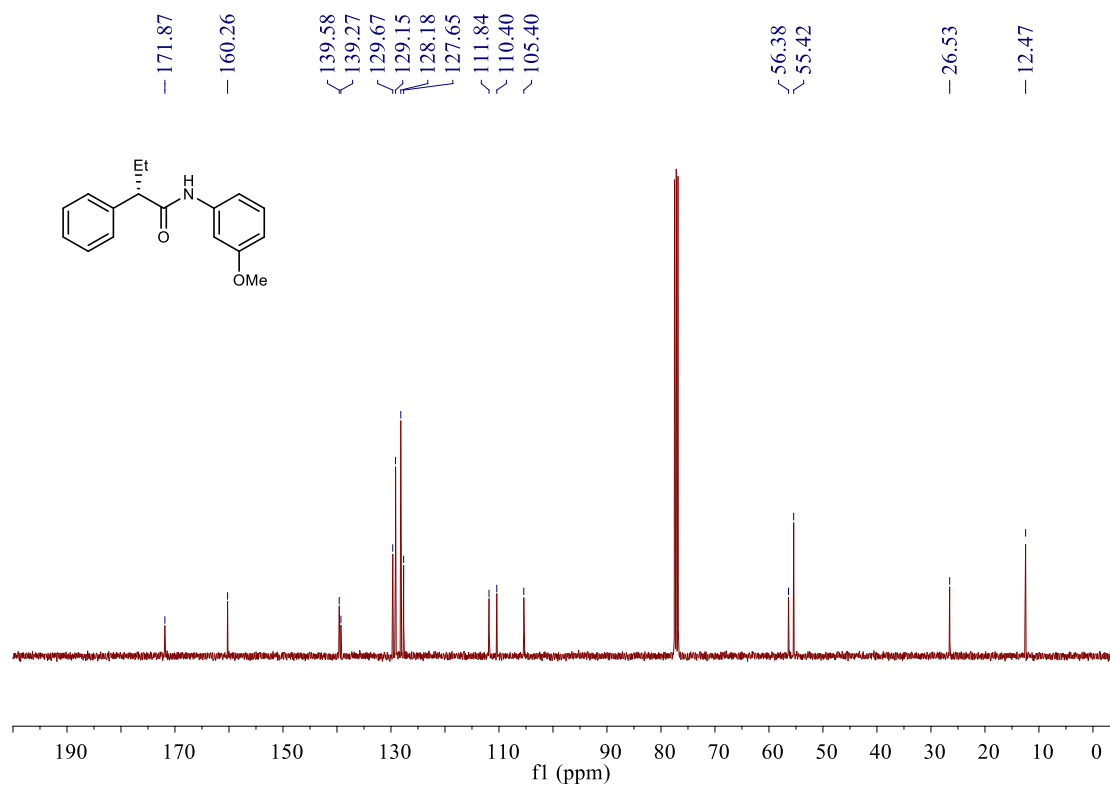

**Compound 30 ( $^1\text{H}$  NMR and  $^{13}\text{C}$  NMR,  $\text{CDCl}_3$ , 400 MHz and 101 MHz respectively)**

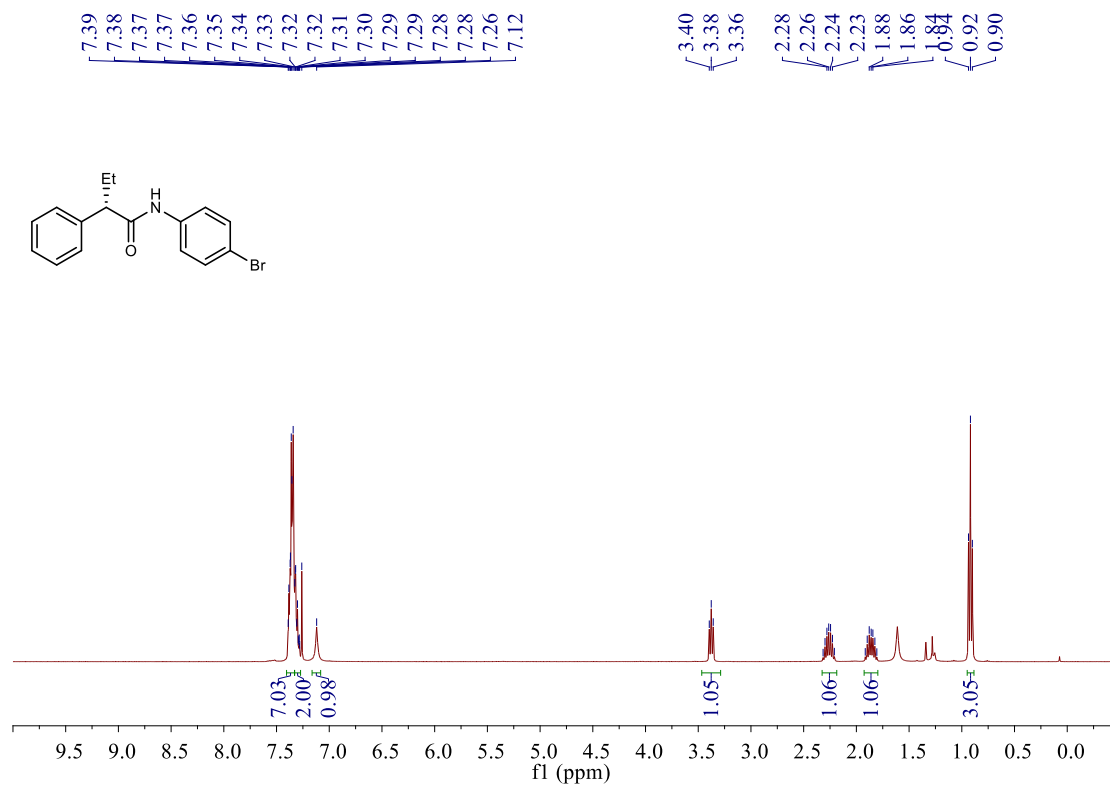

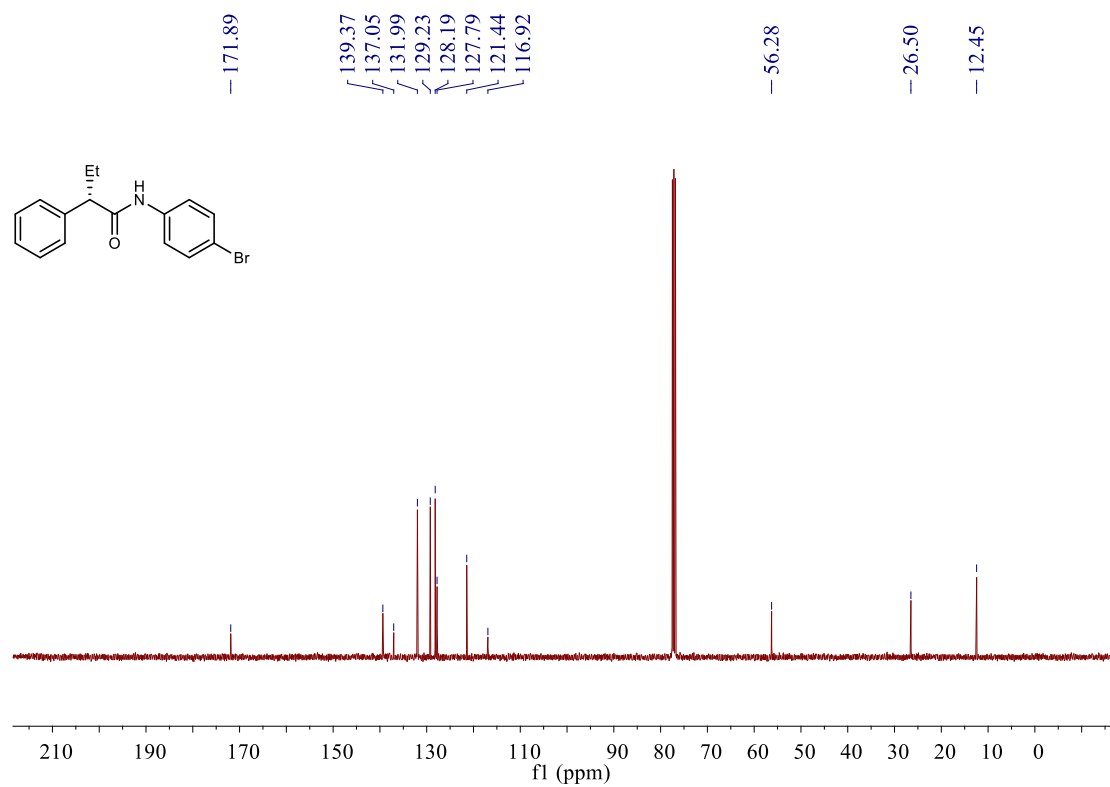

**Compound 31 (<sup>1</sup>H NMR and <sup>13</sup>C NMR, CDCl<sub>3</sub>, 400 MHz and 101 MHz respectively)**

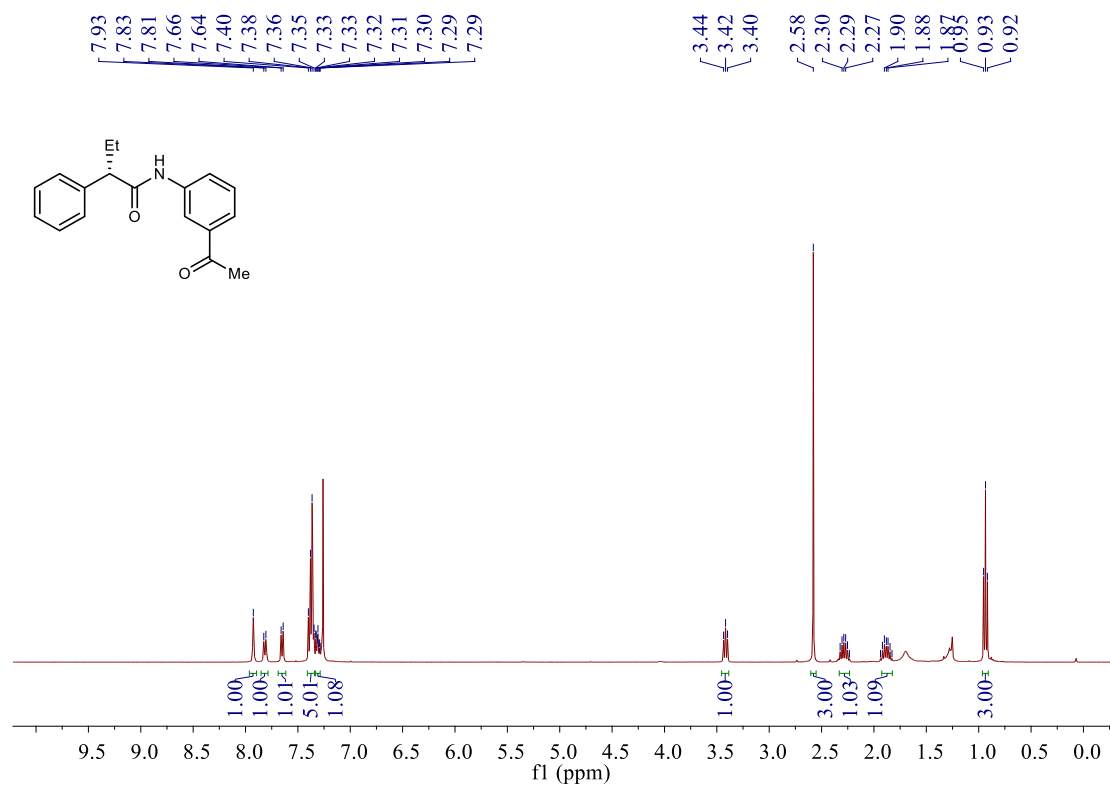

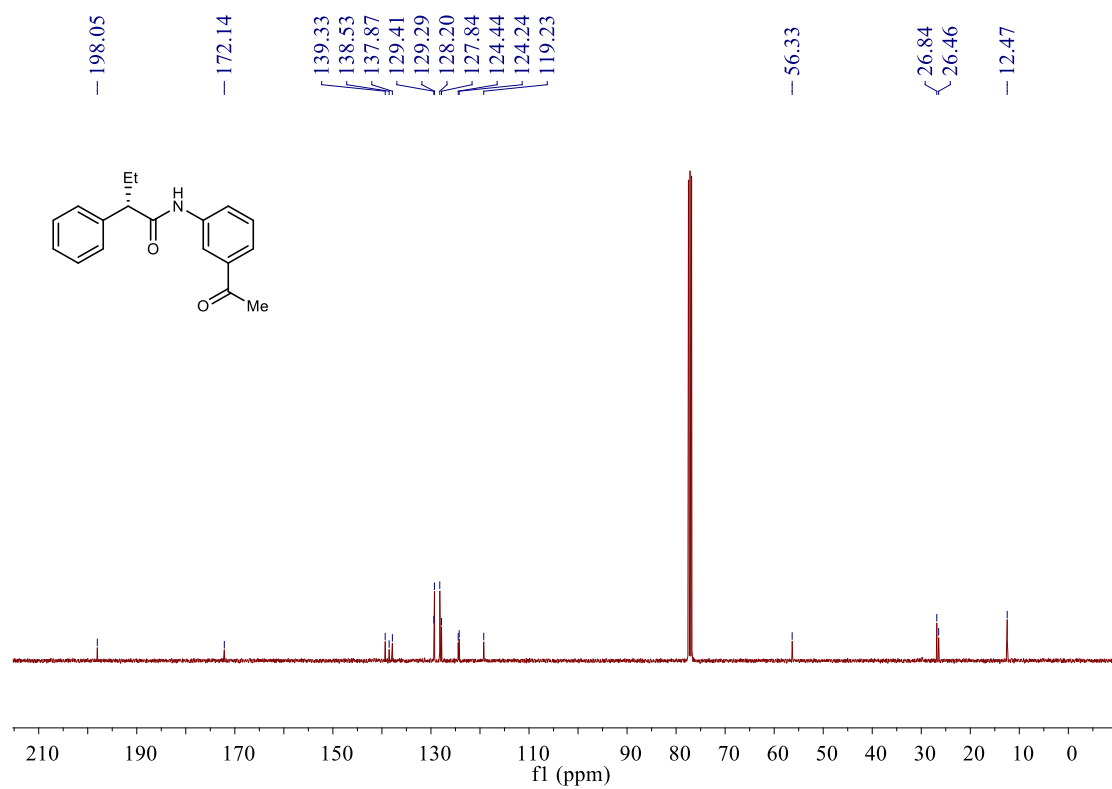

**Compound 32 (<sup>1</sup>H NMR and <sup>13</sup>C NMR, CDCl<sub>3</sub>, 400 MHz and 101 MHz respectively)**

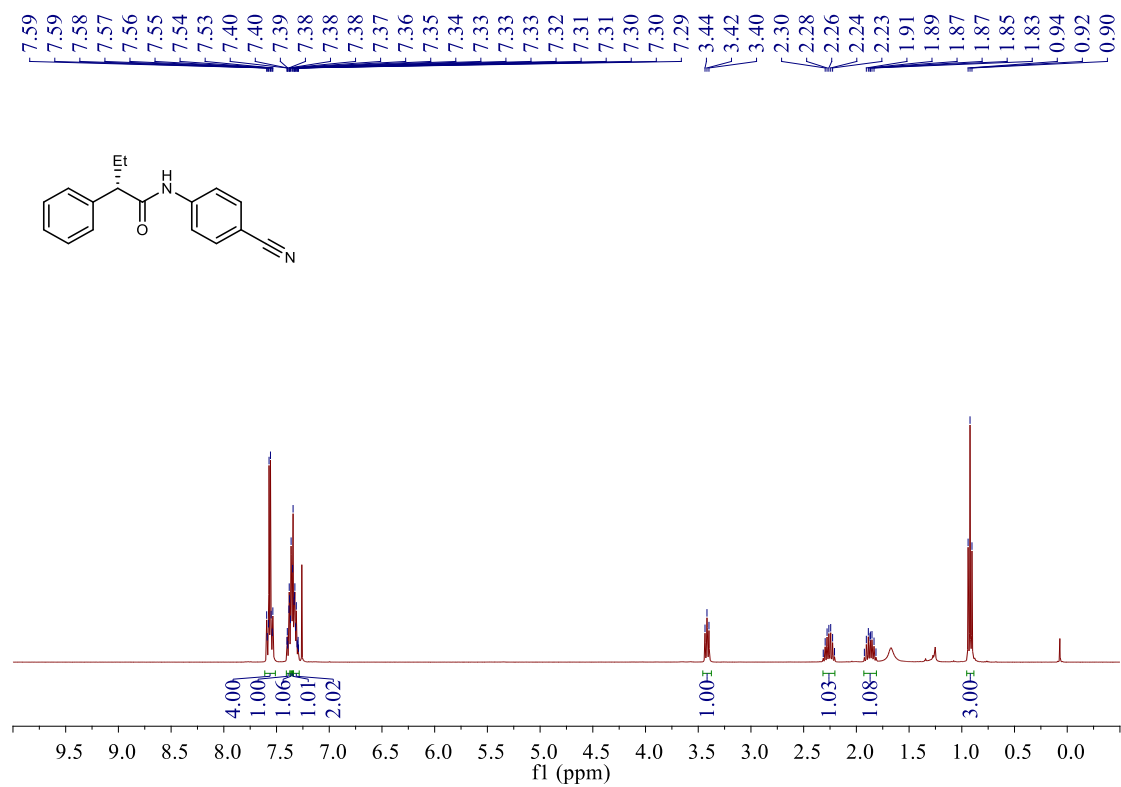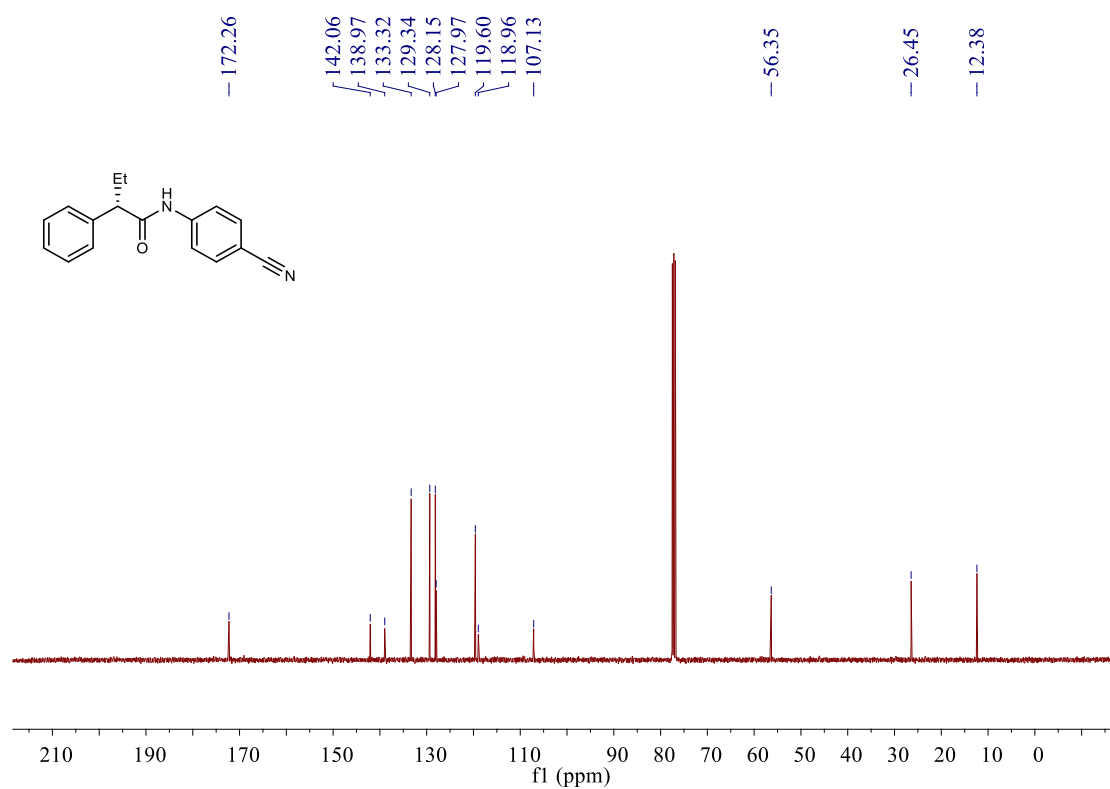

Compound 33 (<sup>1</sup>H NMR, <sup>13</sup>C NMR and <sup>19</sup>F NMR, CDCl<sub>3</sub>, 400 MHz, 101 MHz and 377 MHz respectively)



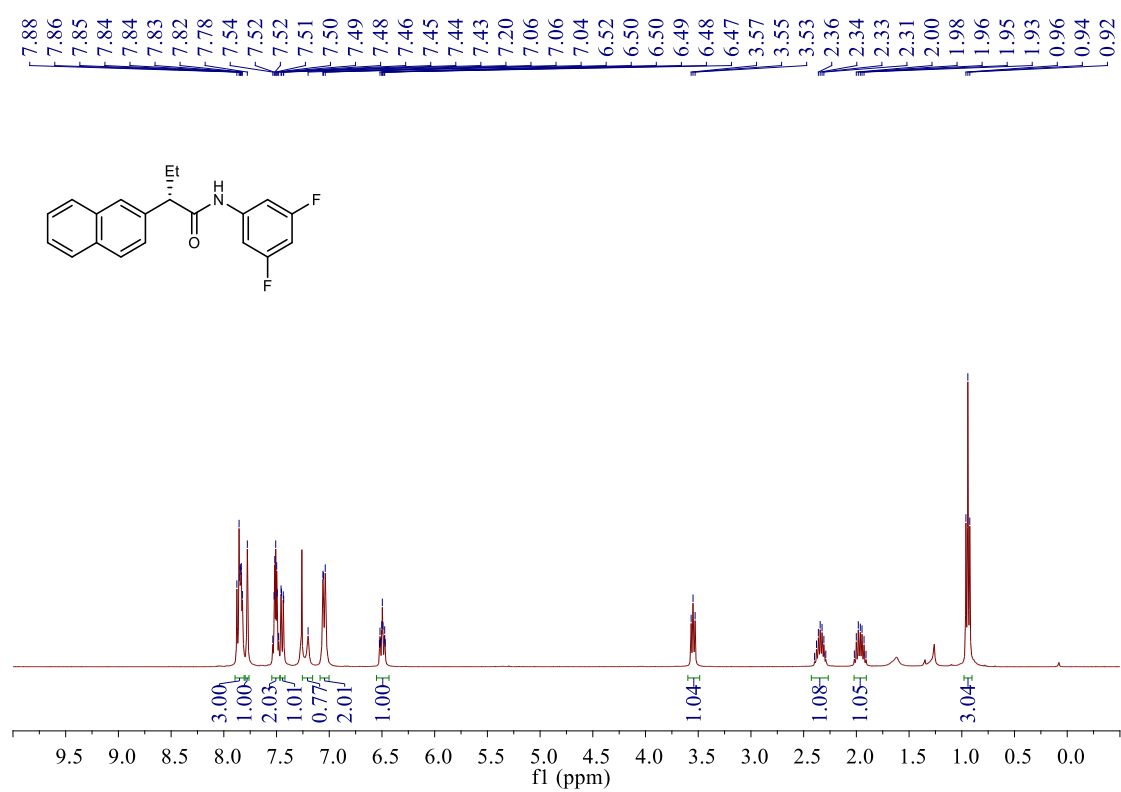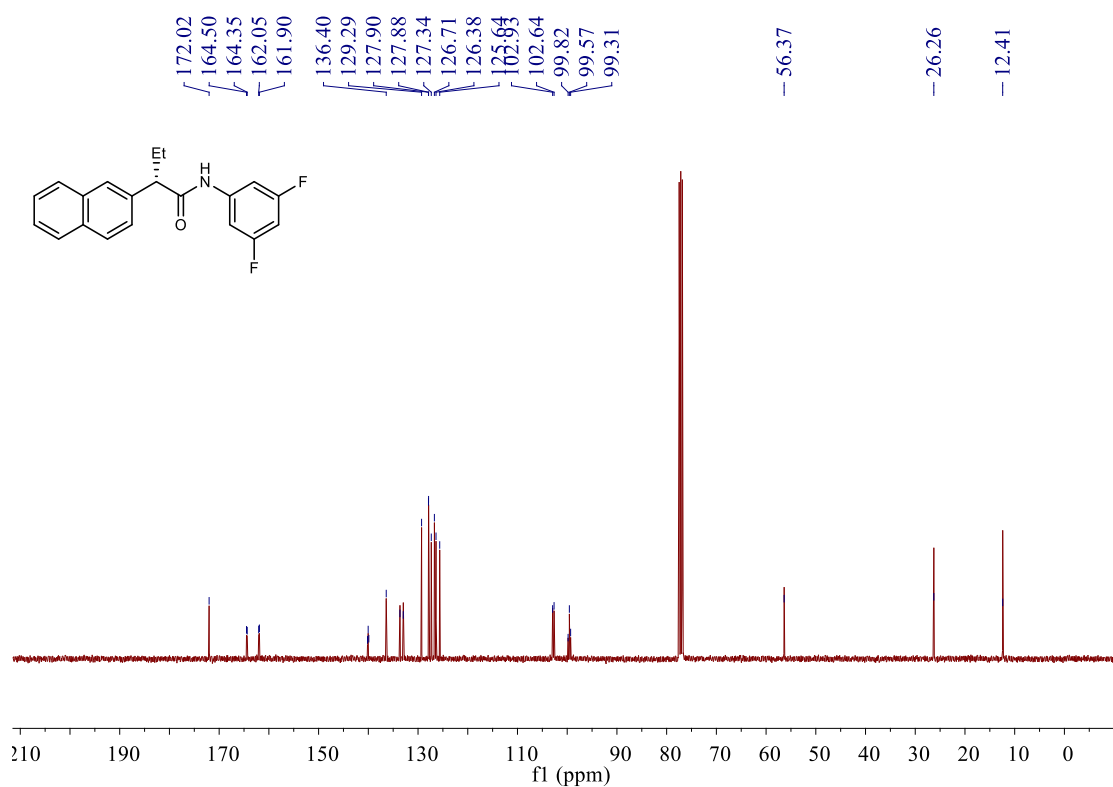

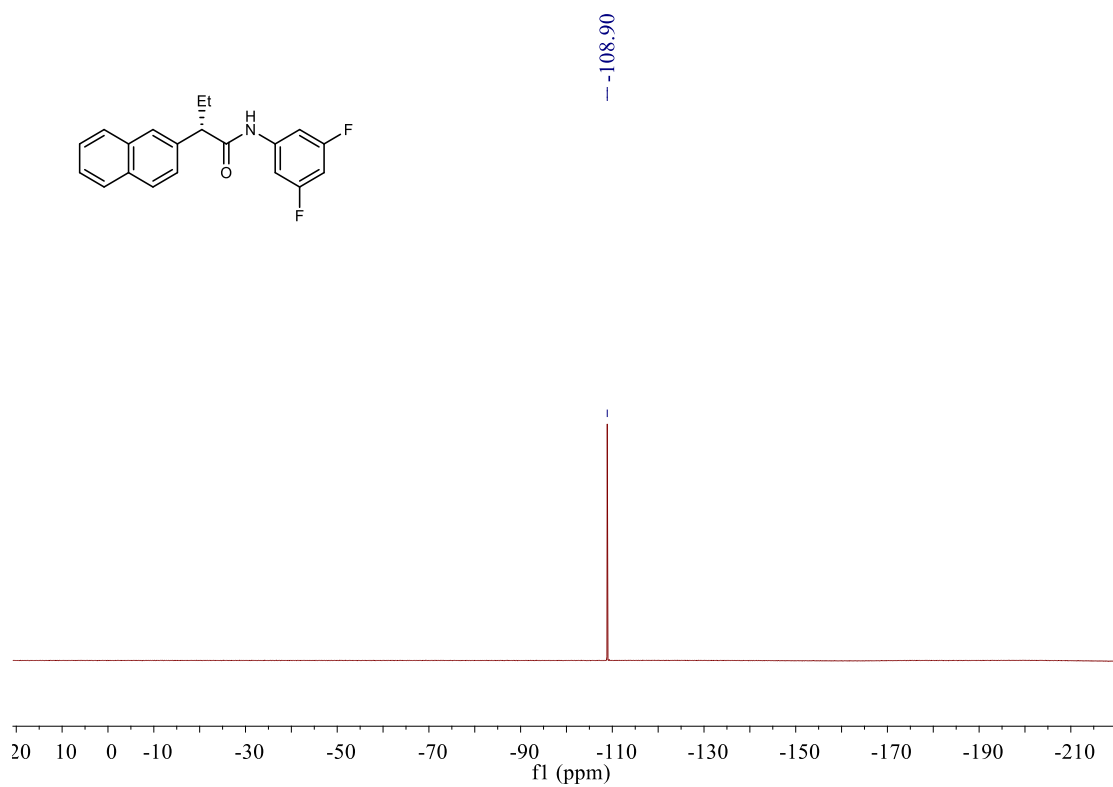

**Compound 34 (<sup>1</sup>H NMR and <sup>13</sup>C NMR, CDCl<sub>3</sub>, 400 MHz and 101 MHz respectively)**

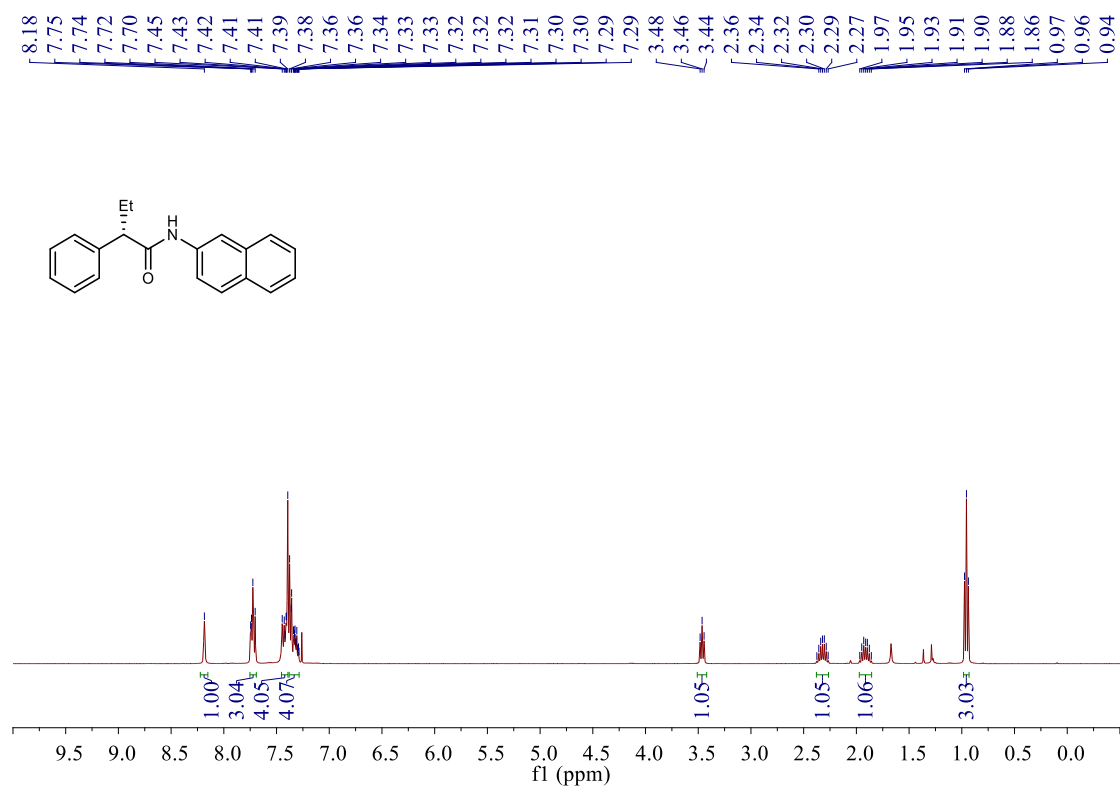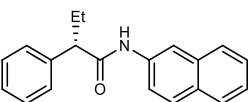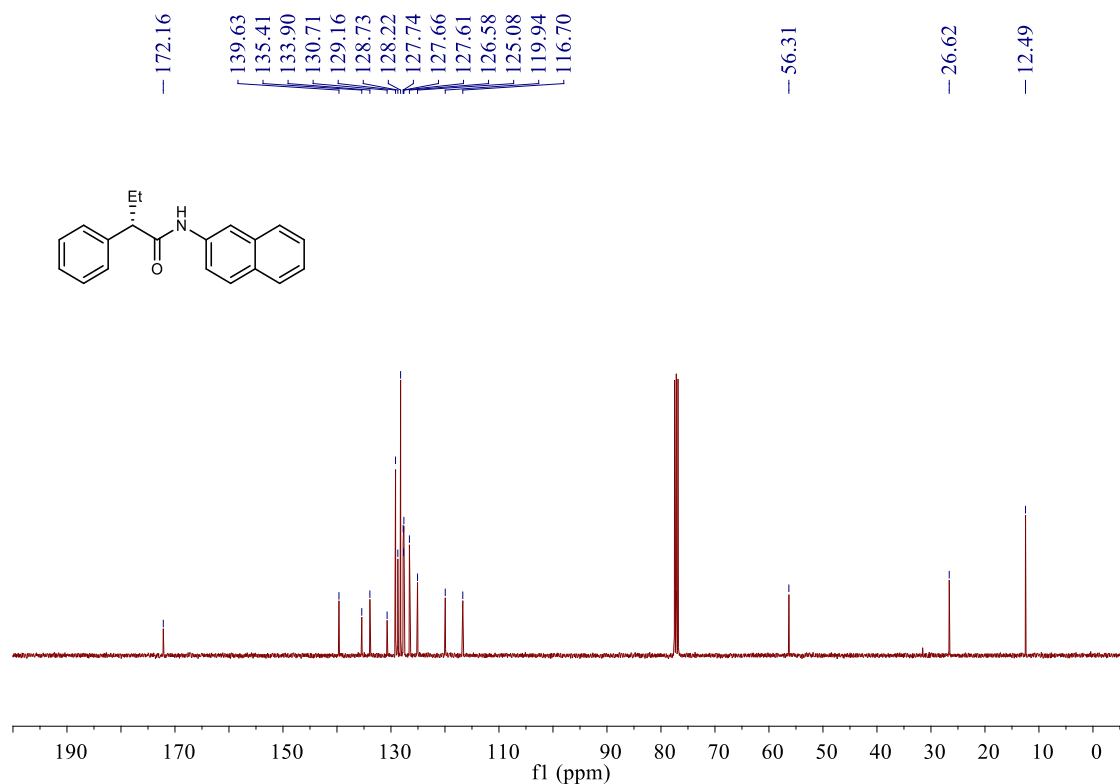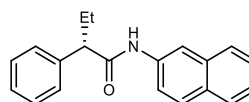

**Compound 35 ( $^1\text{H}$  NMR and  $^{13}\text{C}$  NMR,  $\text{CDCl}_3$ , 400 MHz and 101 MHz respectively)**

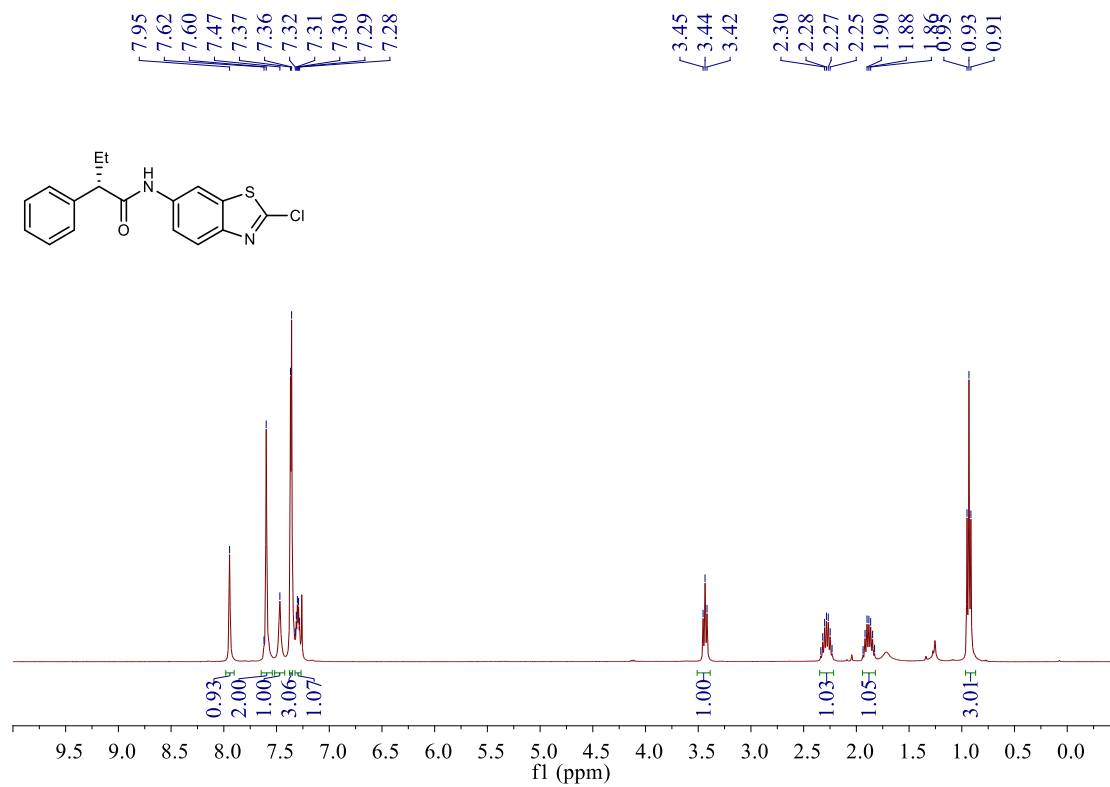

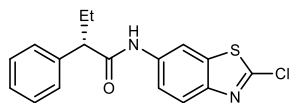

|      |      |      |      |      |      |      |      |      |      |      |      |      |      |      |      |      |      |      |      |      |      |      |      |      |      |      |      |      |      |      |      |      |      |      |      |      |      |      |      |      |      |
|------|------|------|------|------|------|------|------|------|------|------|------|------|------|------|------|------|------|------|------|------|------|------|------|------|------|------|------|------|------|------|------|------|------|------|------|------|------|------|------|------|------|
| 9.98 | 8.73 | 8.71 | 8.71 | 7.96 | 7.92 | 7.90 | 7.90 | 7.88 | 7.86 | 7.84 | 7.83 | 7.81 | 7.61 | 7.59 | 7.50 | 7.50 | 7.49 | 7.49 | 7.48 | 7.47 | 7.47 | 7.43 | 7.41 | 7.39 | 7.38 | 7.38 | 7.36 | 7.36 | 7.26 | 7.18 | 7.15 | 3.84 | 3.83 | 3.82 | 3.80 | 2.51 | 2.49 | 2.34 | 1.06 | 1.04 | 1.02 |
|------|------|------|------|------|------|------|------|------|------|------|------|------|------|------|------|------|------|------|------|------|------|------|------|------|------|------|------|------|------|------|------|------|------|------|------|------|------|------|------|------|------|

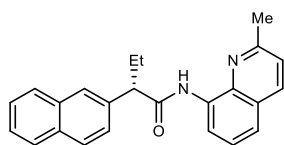

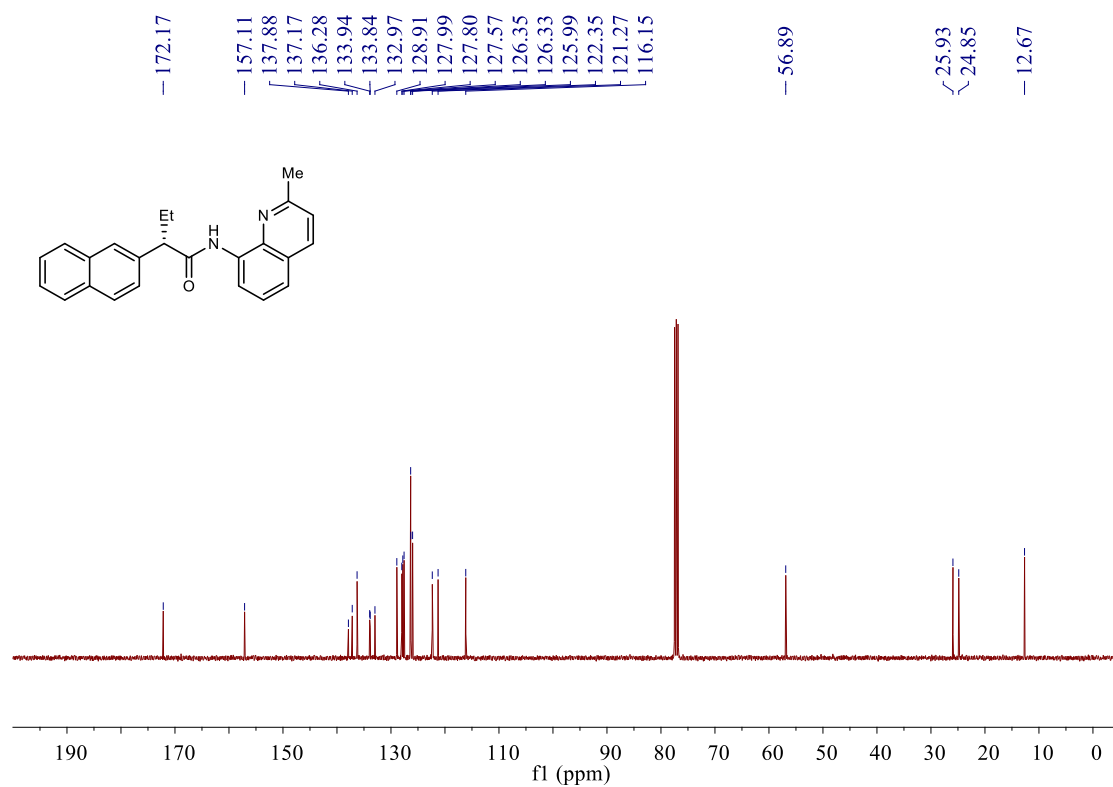

**Compound 37 (<sup>1</sup>H NMR and <sup>13</sup>C NMR, CDCl<sub>3</sub>, 400 MHz and 101 MHz respectively)**

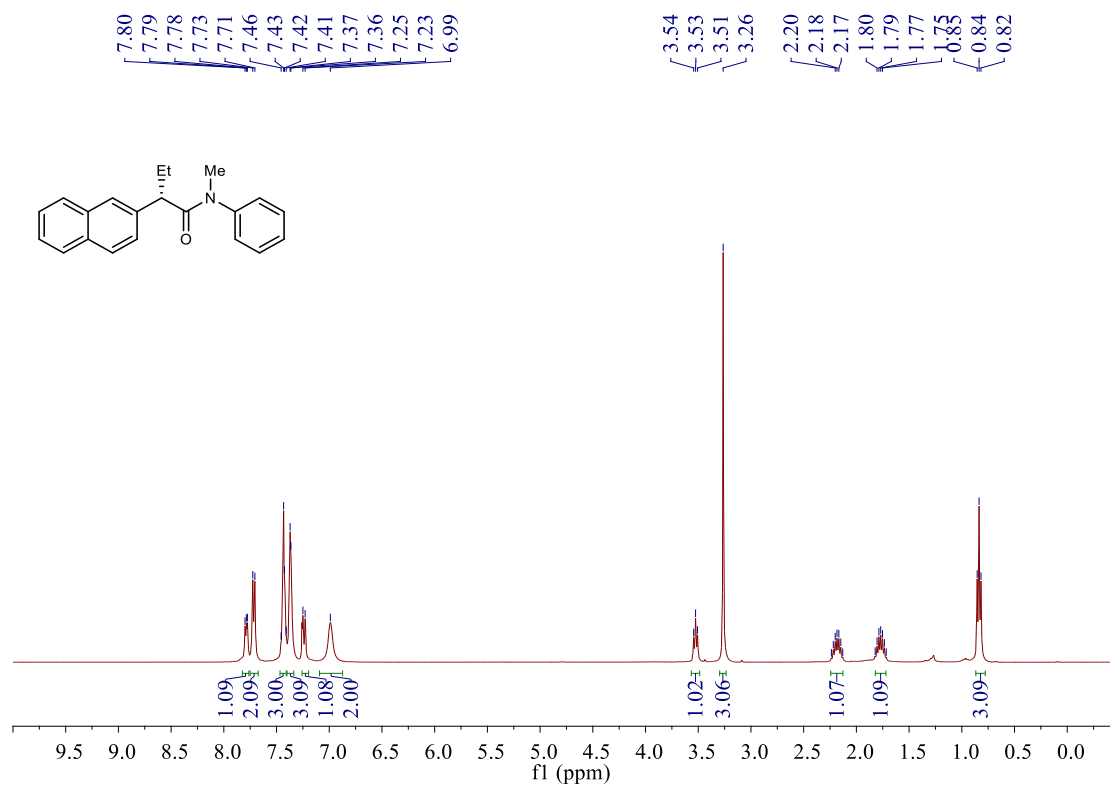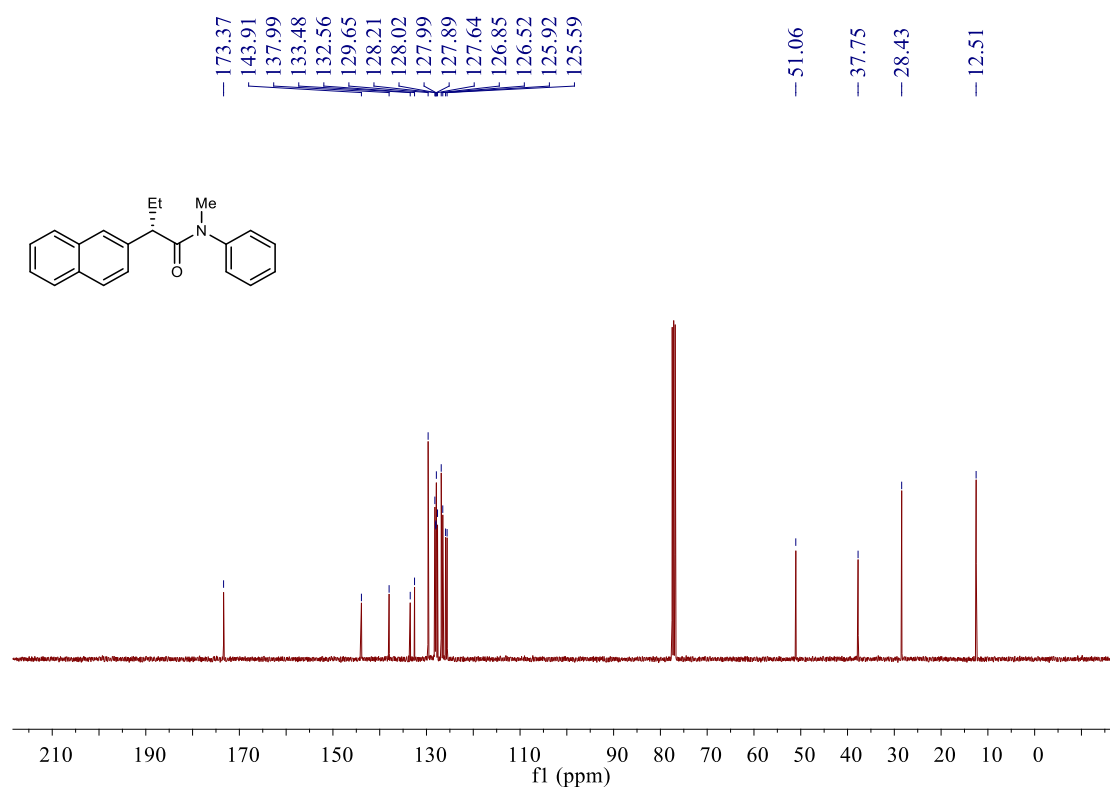

**Compound 38 (<sup>1</sup>H NMR and <sup>13</sup>C NMR, CDCl<sub>3</sub>, 400 MHz and 101 MHz respectively)**

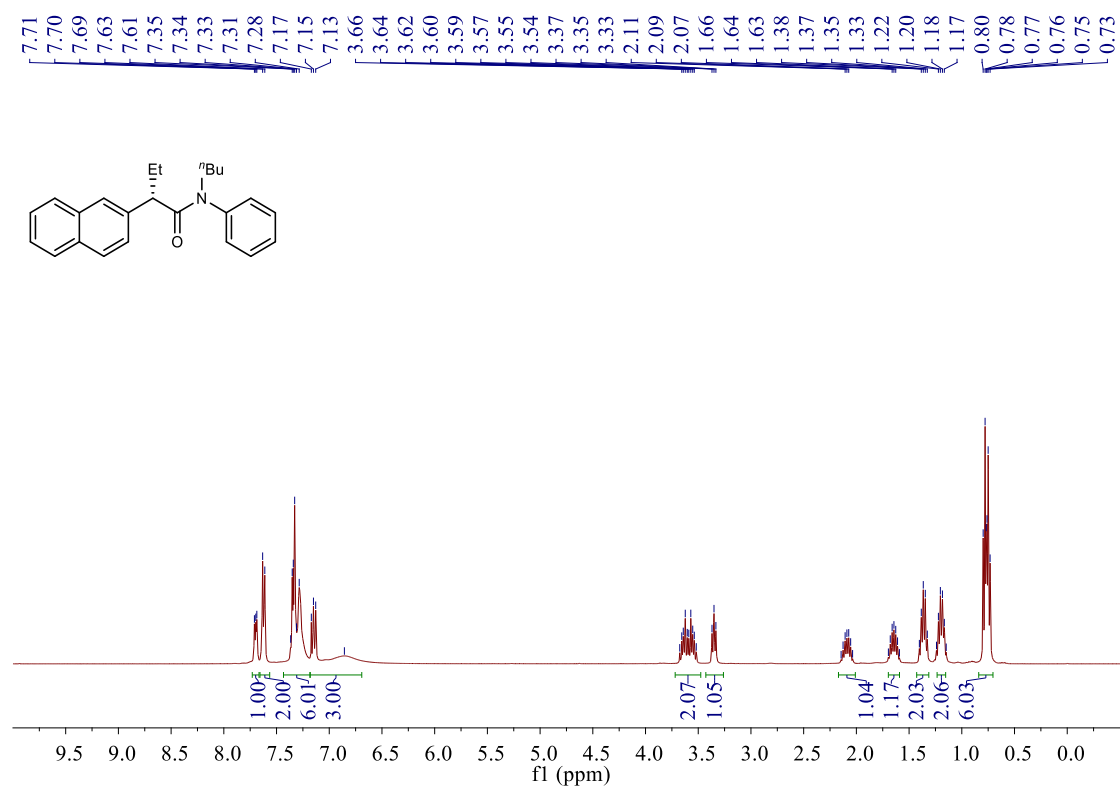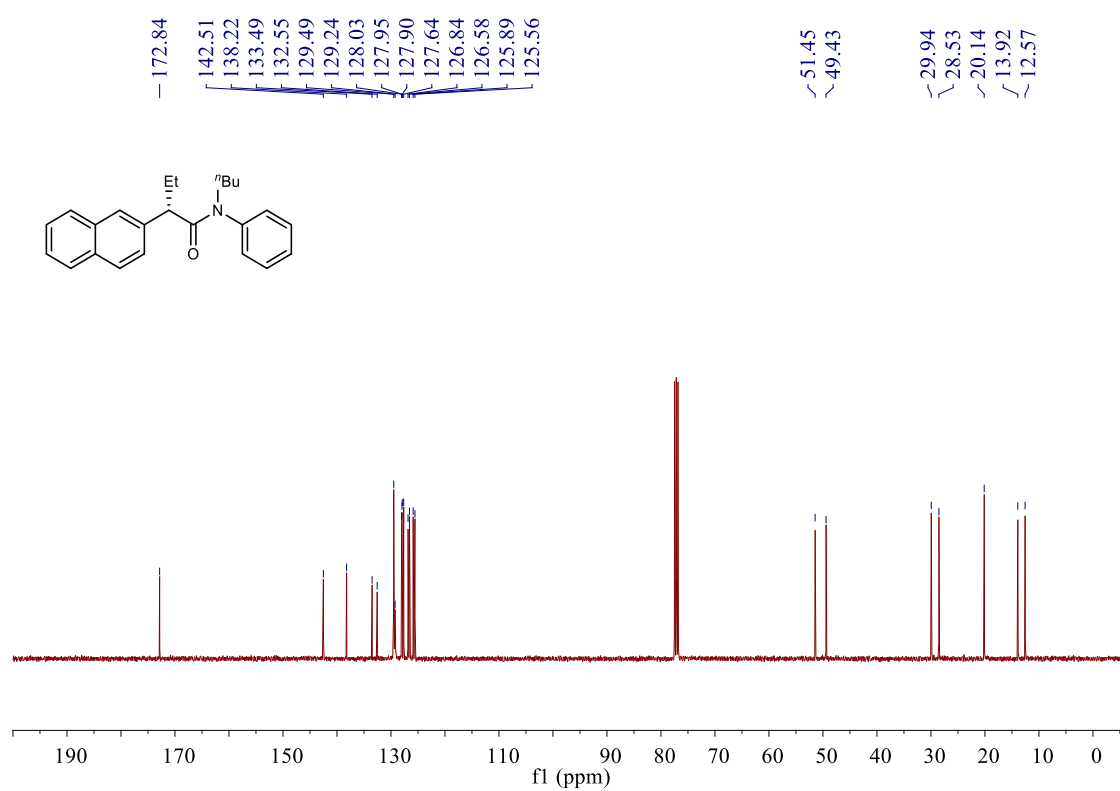



**Compound 39 ( $^1\text{H}$  NMR and  $^{13}\text{C}$  NMR,  $\text{CDCl}_3$ , 400 MHz and 101 MHz respectively)**

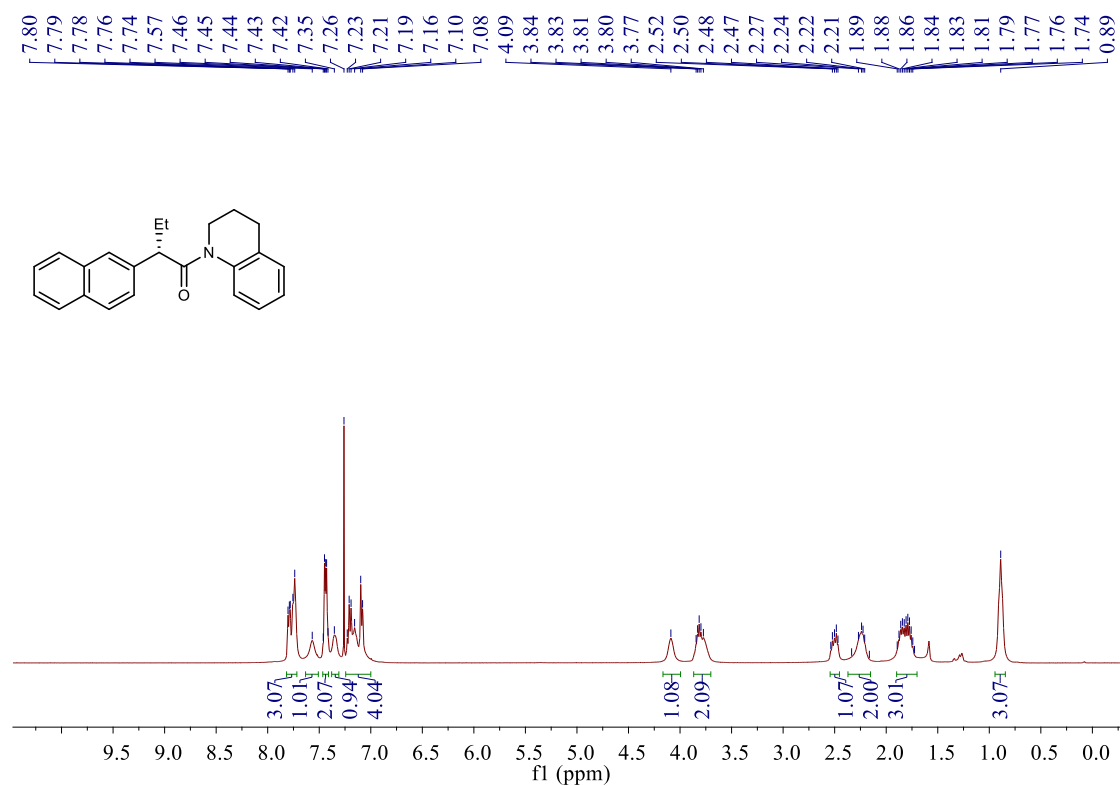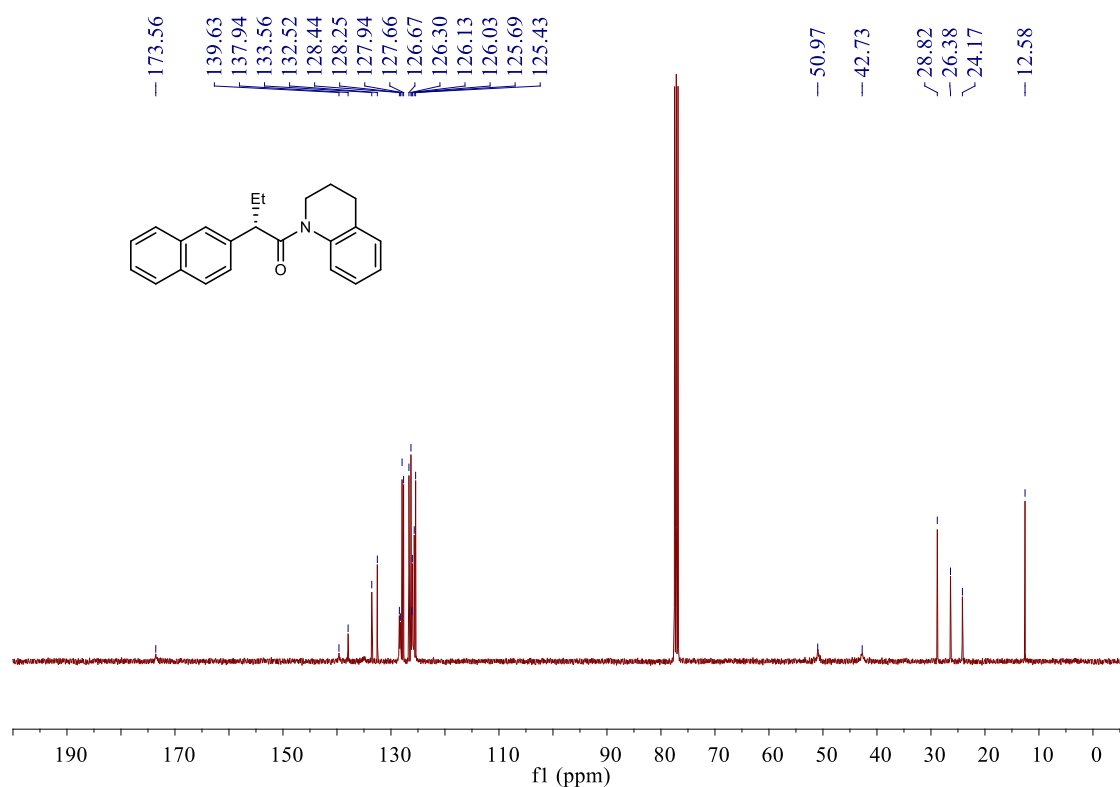

**Compound 40 ( $^1\text{H}$  NMR and  $^{13}\text{C}$  NMR,  $\text{CDCl}_3$ , 400 MHz and 101 MHz respectively)**

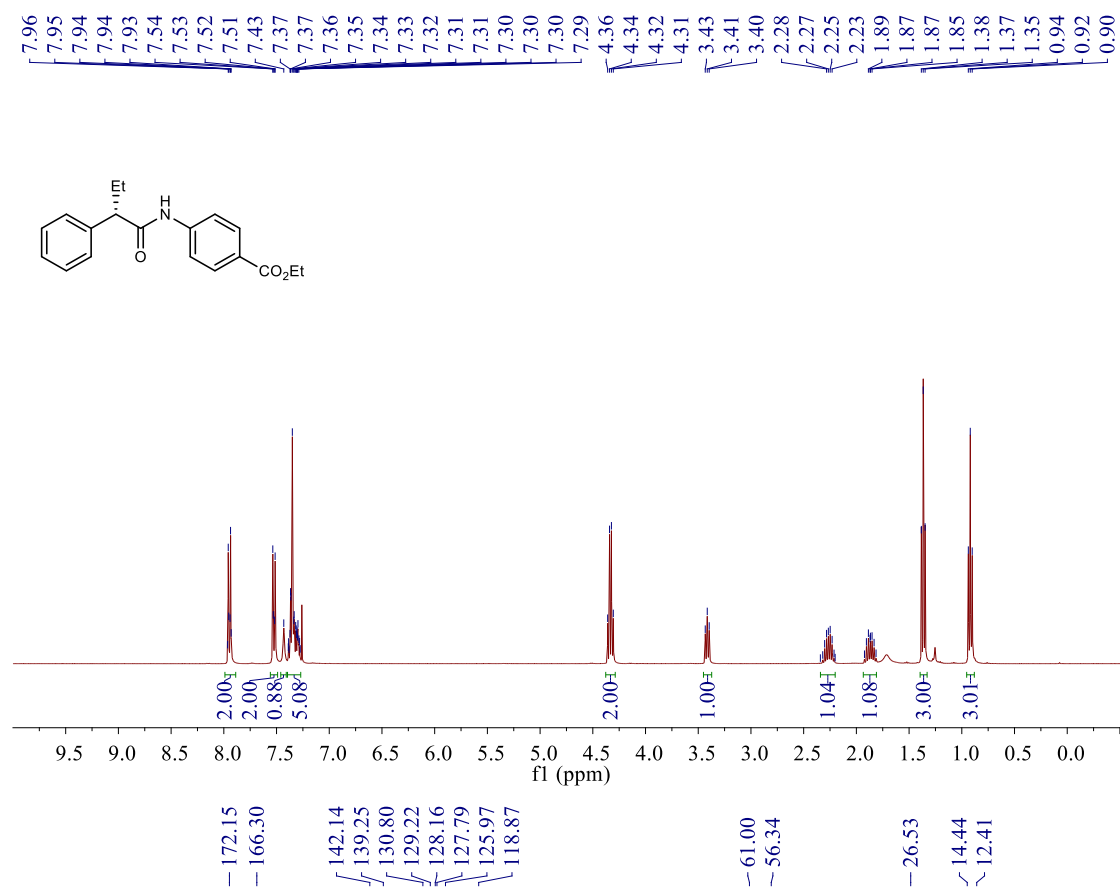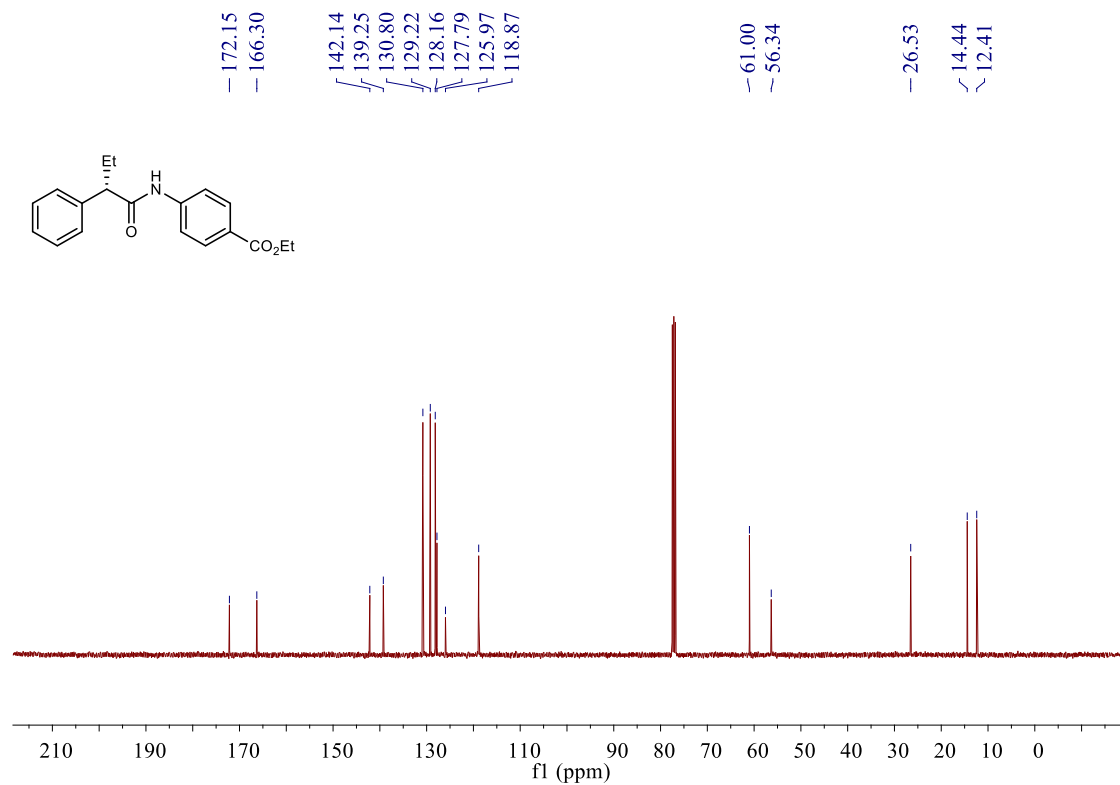

**Compound 41 ( $^1\text{H}$  NMR and  $^{13}\text{C}$  NMR, Acetone- $\text{d}_6$ , 400 MHz and 101 MHz respectively)**

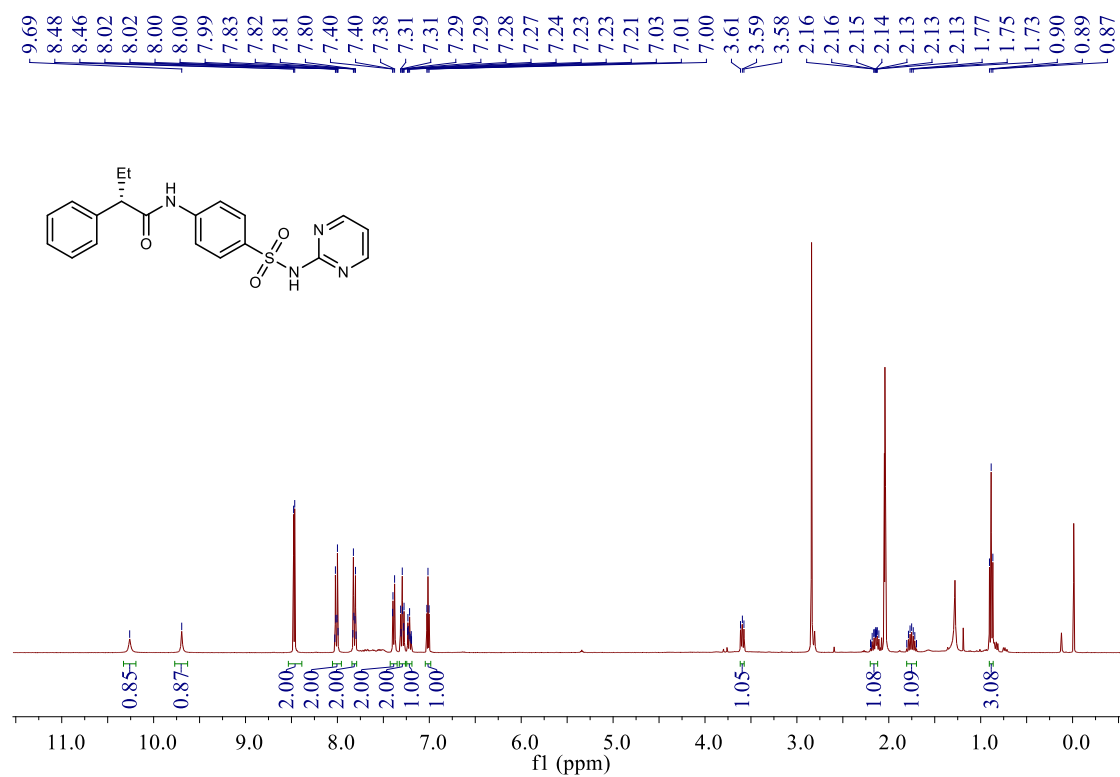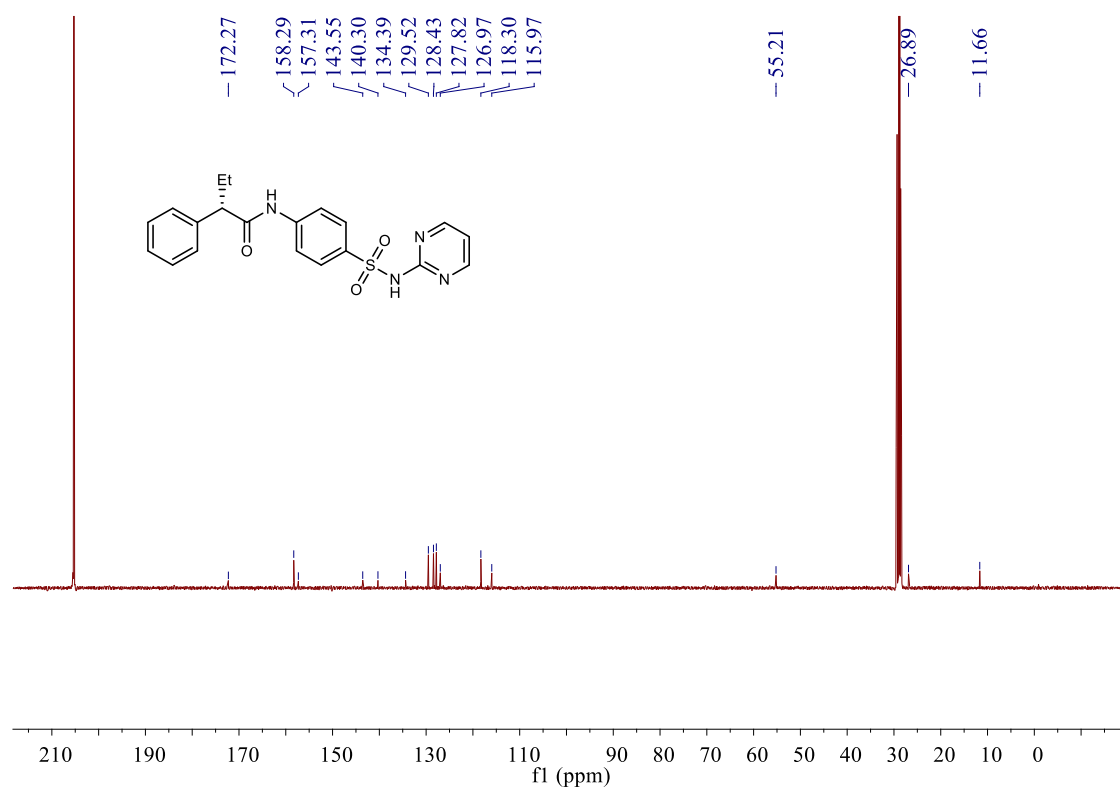

**Compound 42 ( $^1\text{H}$  NMR and  $^{13}\text{C}$  NMR,  $\text{CDCl}_3$ , 400 MHz and 101 MHz respectively)**

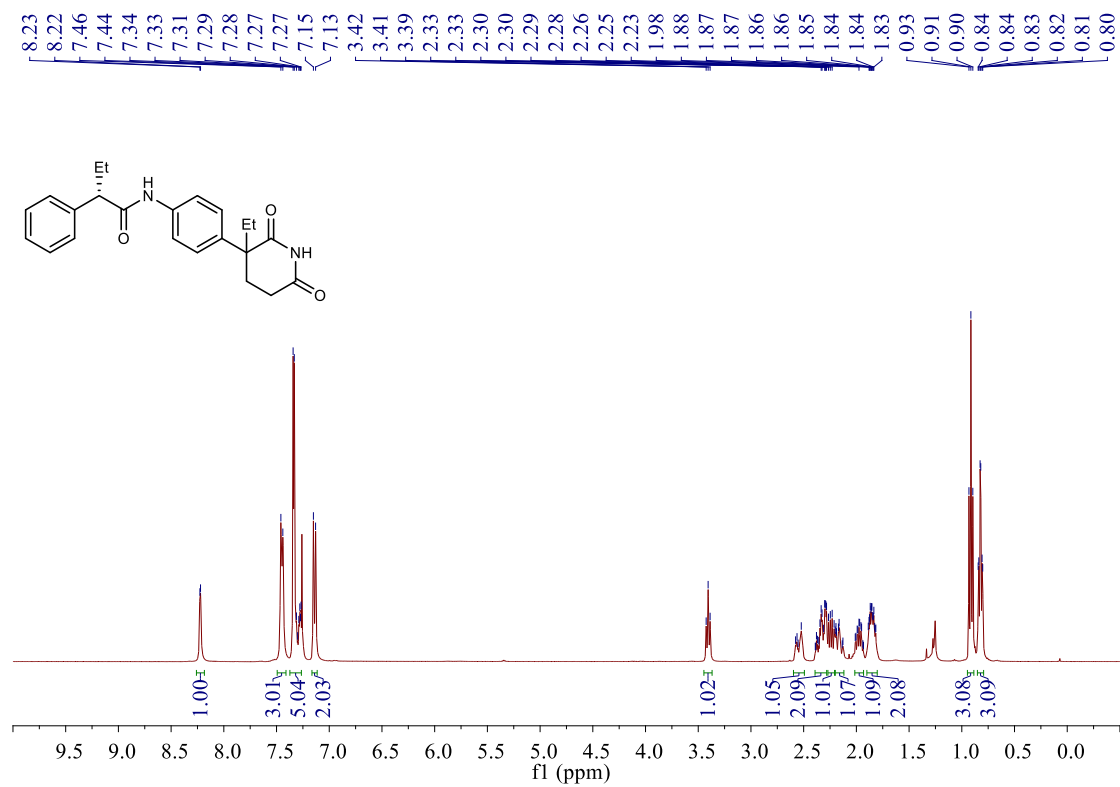

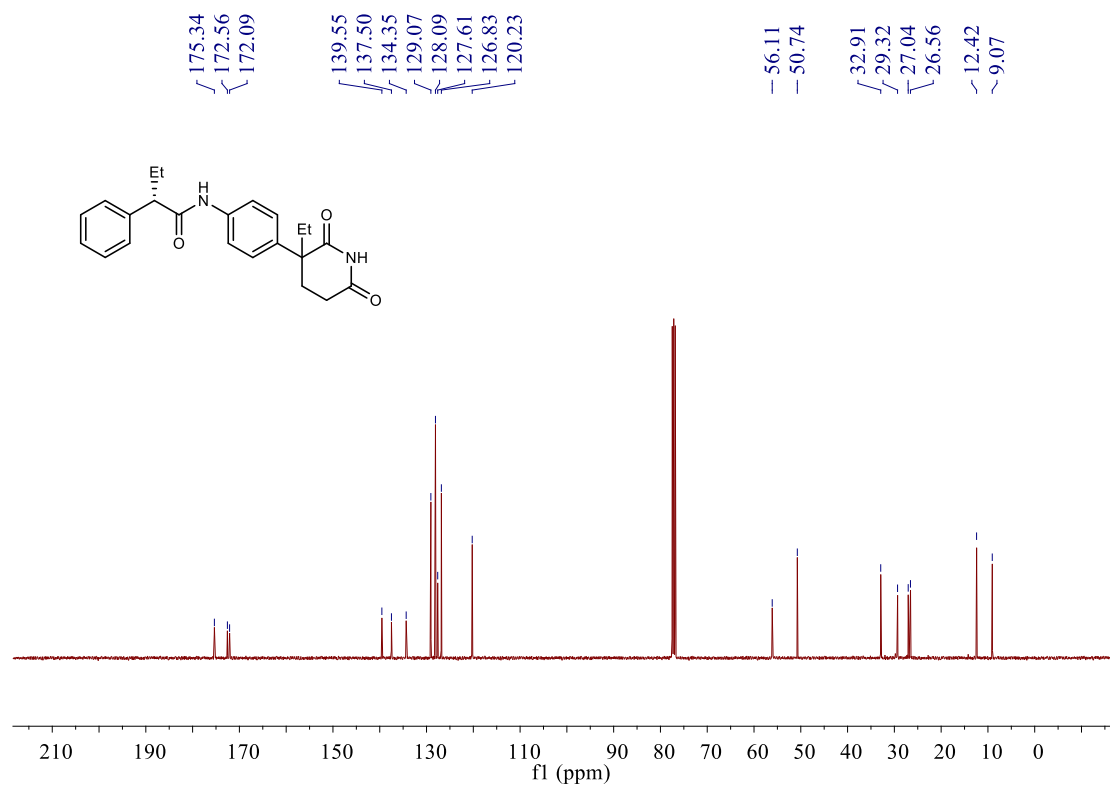

**Compound 43 (<sup>1</sup>H NMR and <sup>13</sup>C NMR, CDCl<sub>3</sub>, 400 MHz and 101 MHz respectively)**

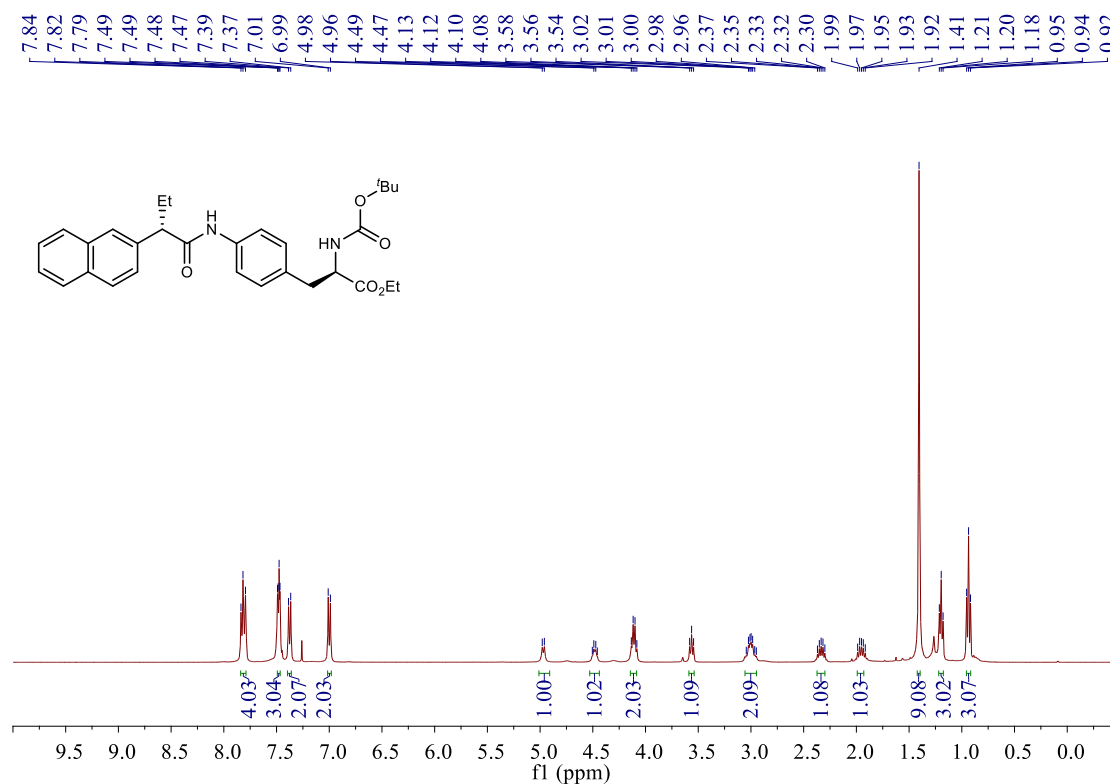

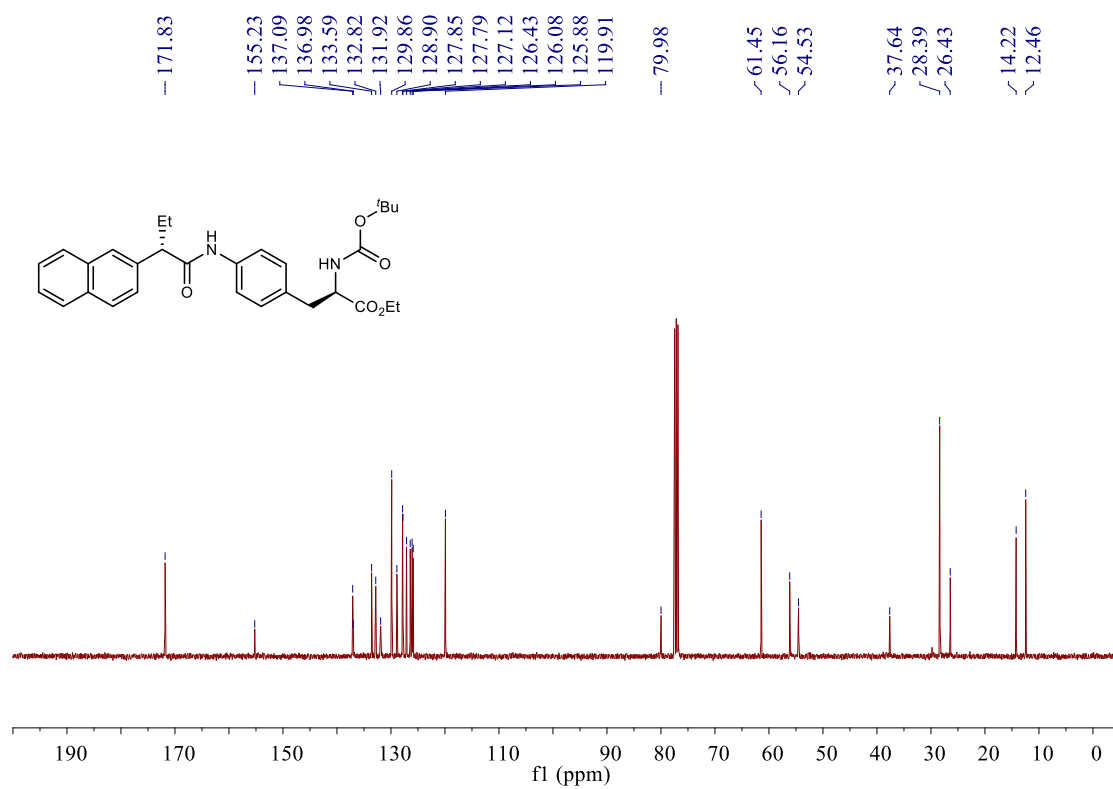

**Compound 44 (<sup>1</sup>H NMR and <sup>13</sup>C NMR, CDCl<sub>3</sub>, 400 MHz and 101 MHz respectively)**

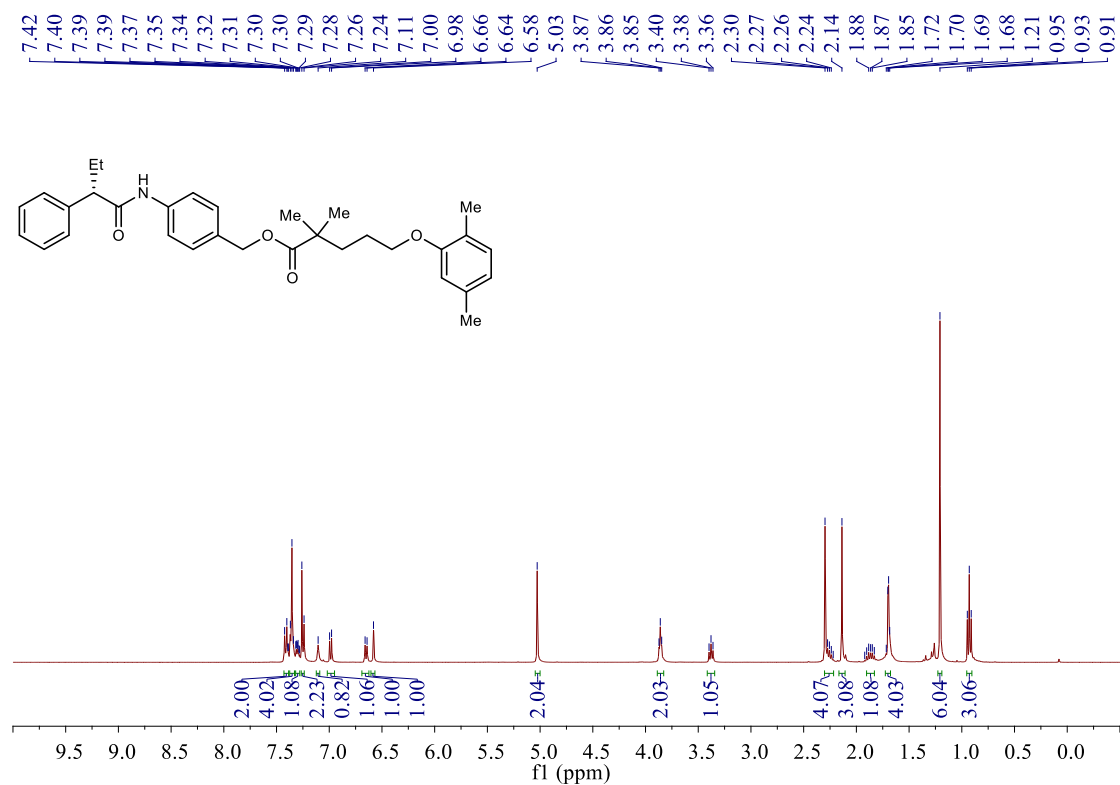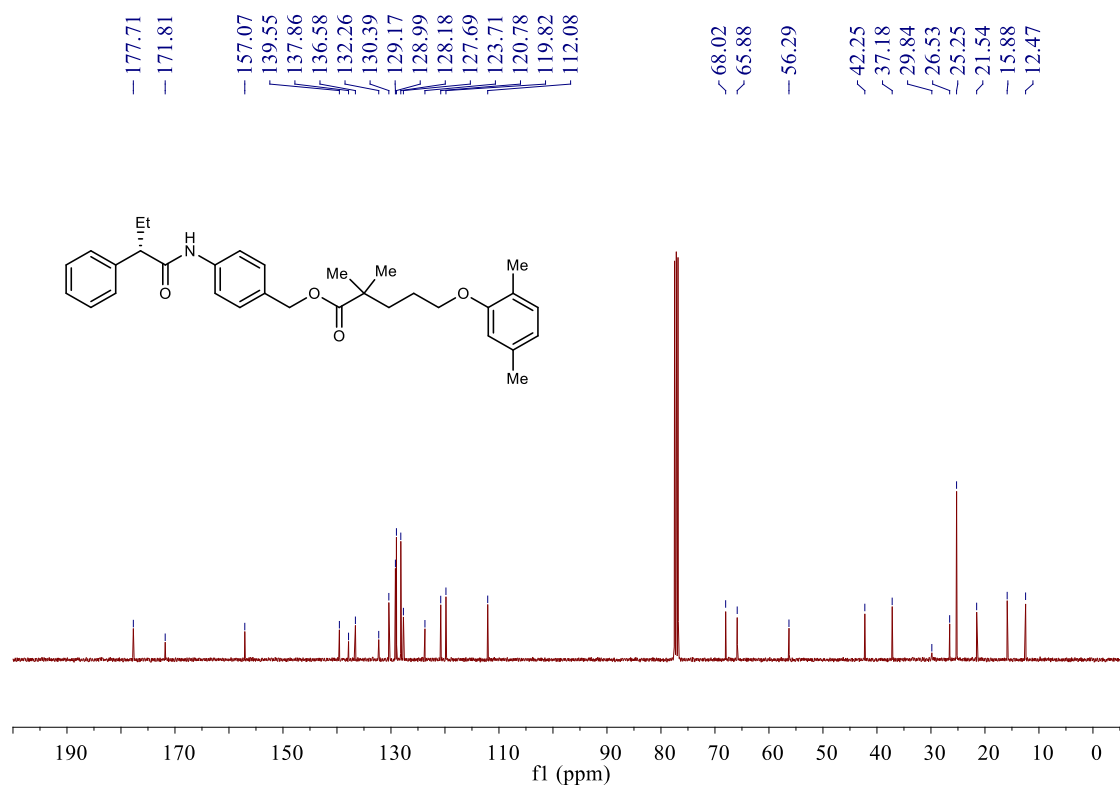

**Compound 45 (<sup>1</sup>H NMR and <sup>13</sup>C NMR, CDCl<sub>3</sub>, 400 MHz and 101 MHz respectively)**

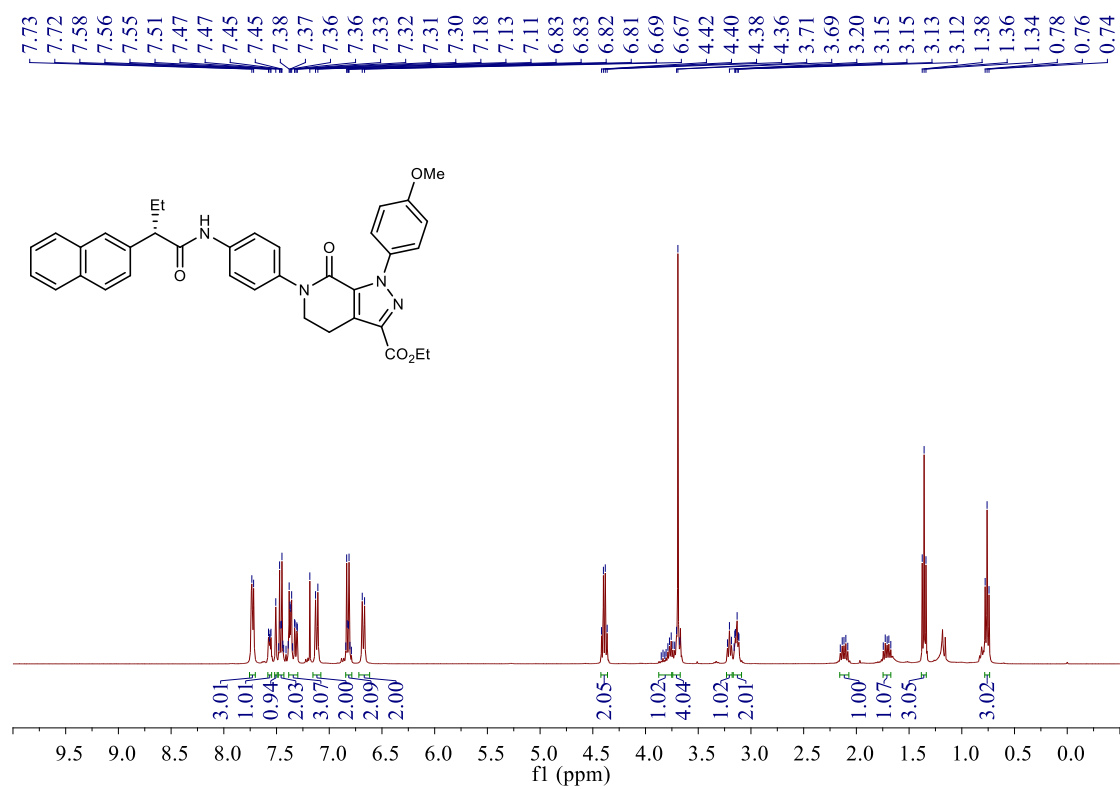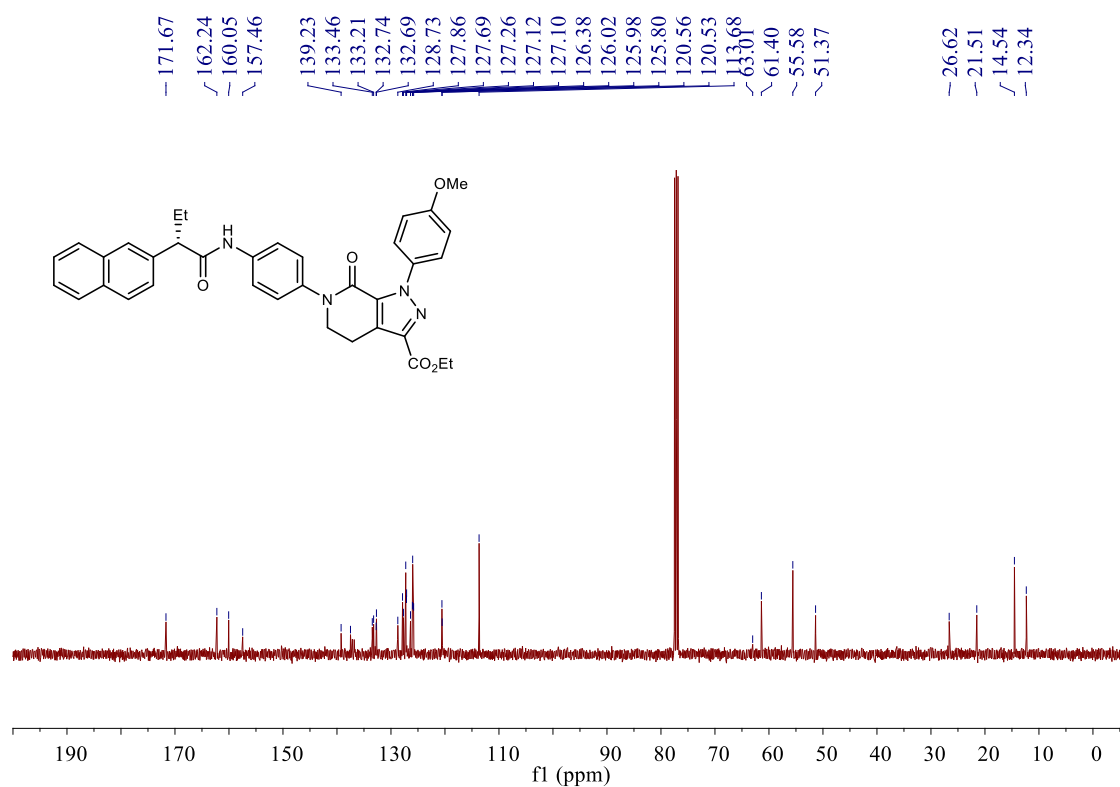



**Compound 46 ( $^1\text{H}$  NMR and  $^{13}\text{C}$  NMR,  $\text{CDCl}_3$ , 400 MHz and 101 MHz respectively)**

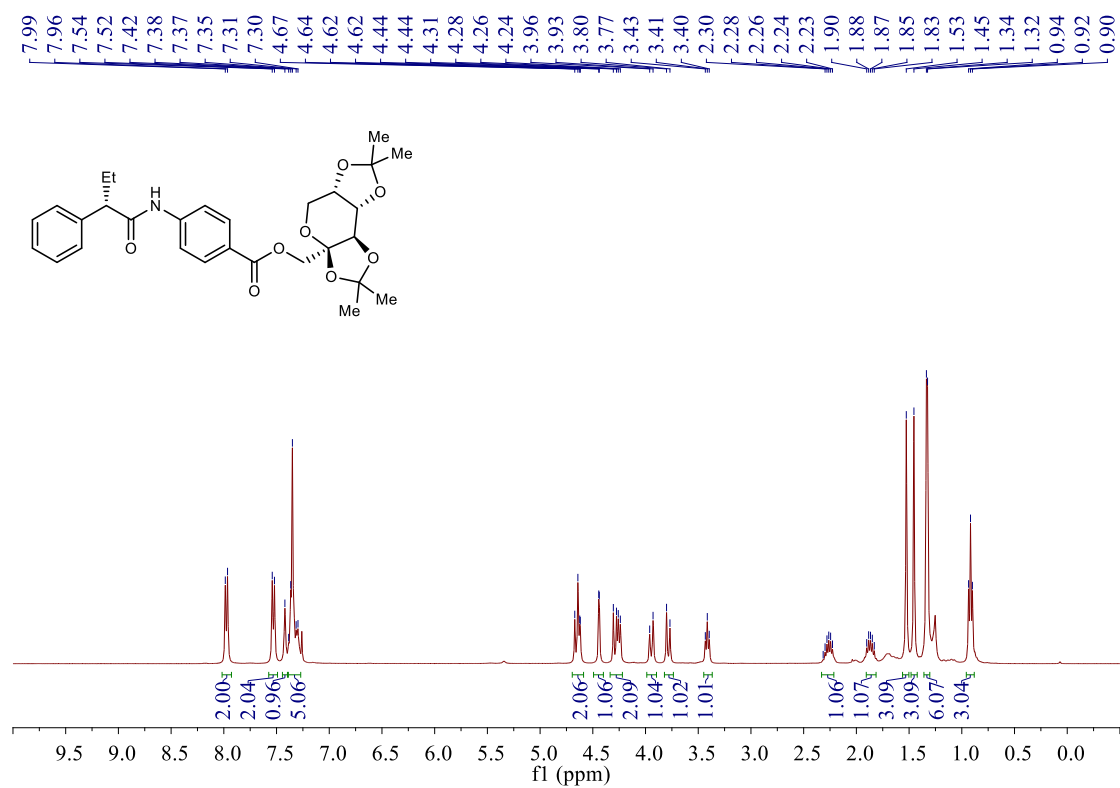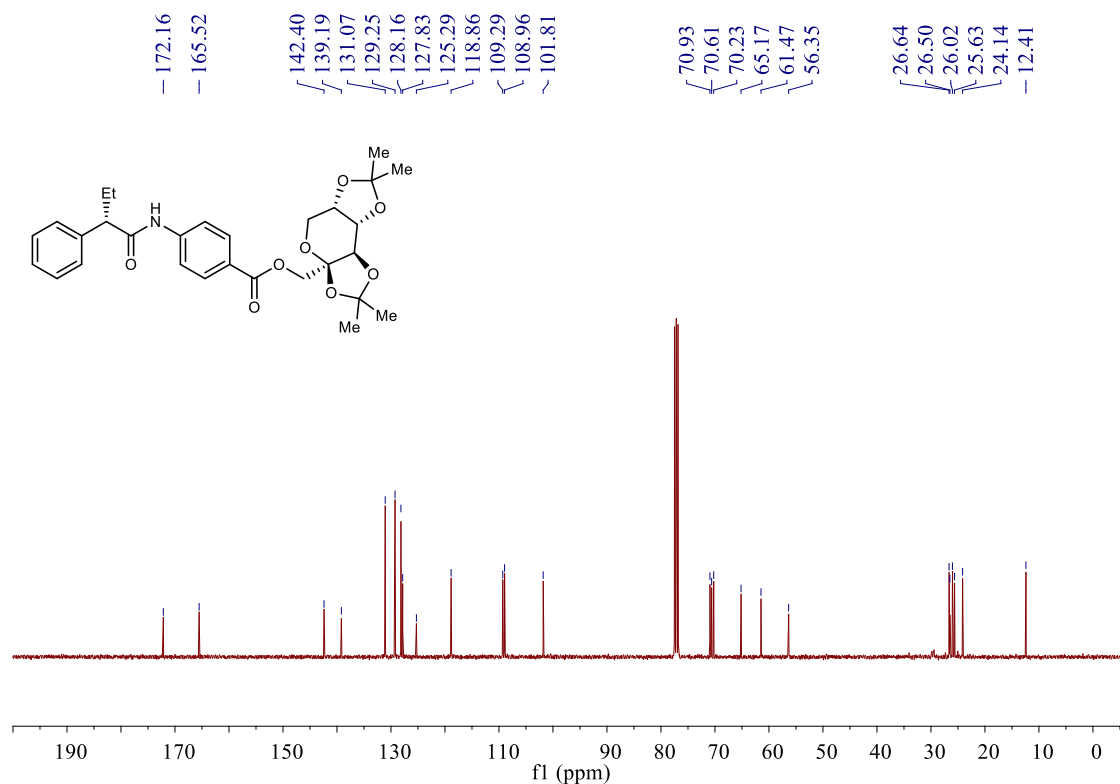

**Compound 47 (<sup>1</sup>H NMR and <sup>13</sup>C NMR, CDCl<sub>3</sub>, 400 MHz and 101 MHz respectively)**

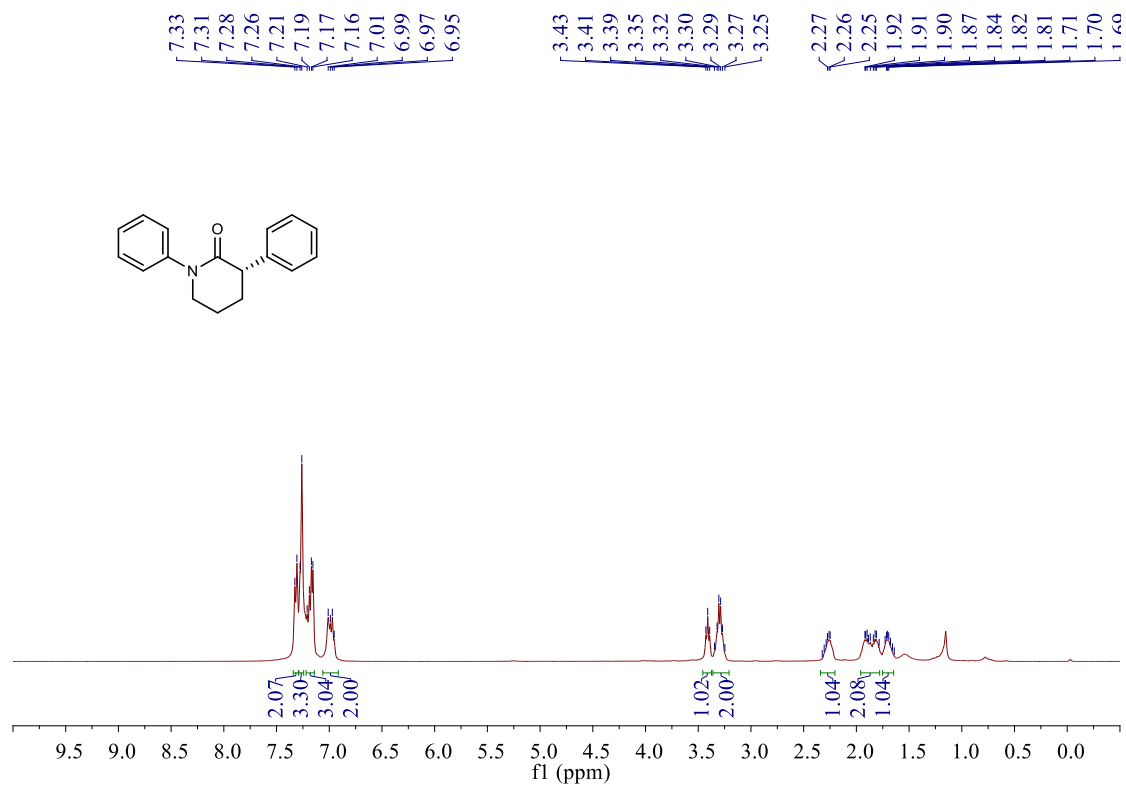

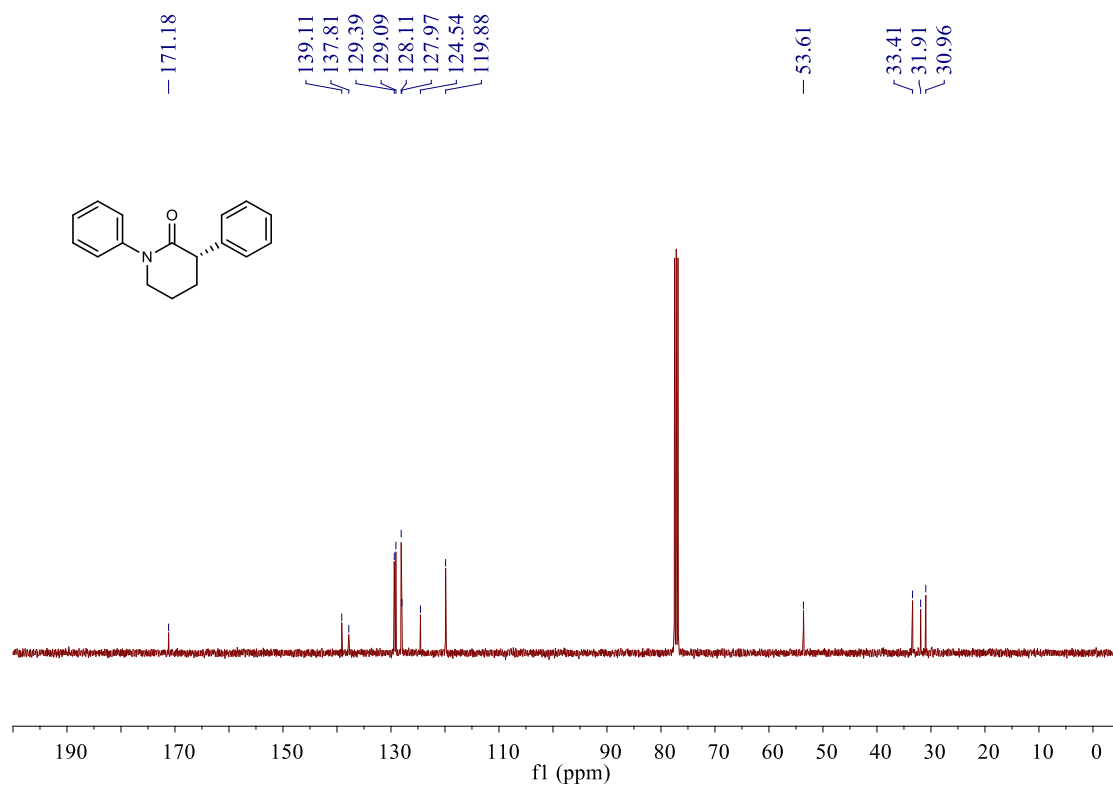

**Compound 48 (<sup>1</sup>H NMR and <sup>13</sup>C NMR, CDCl<sub>3</sub>, 400 MHz and 101 MHz respectively)**

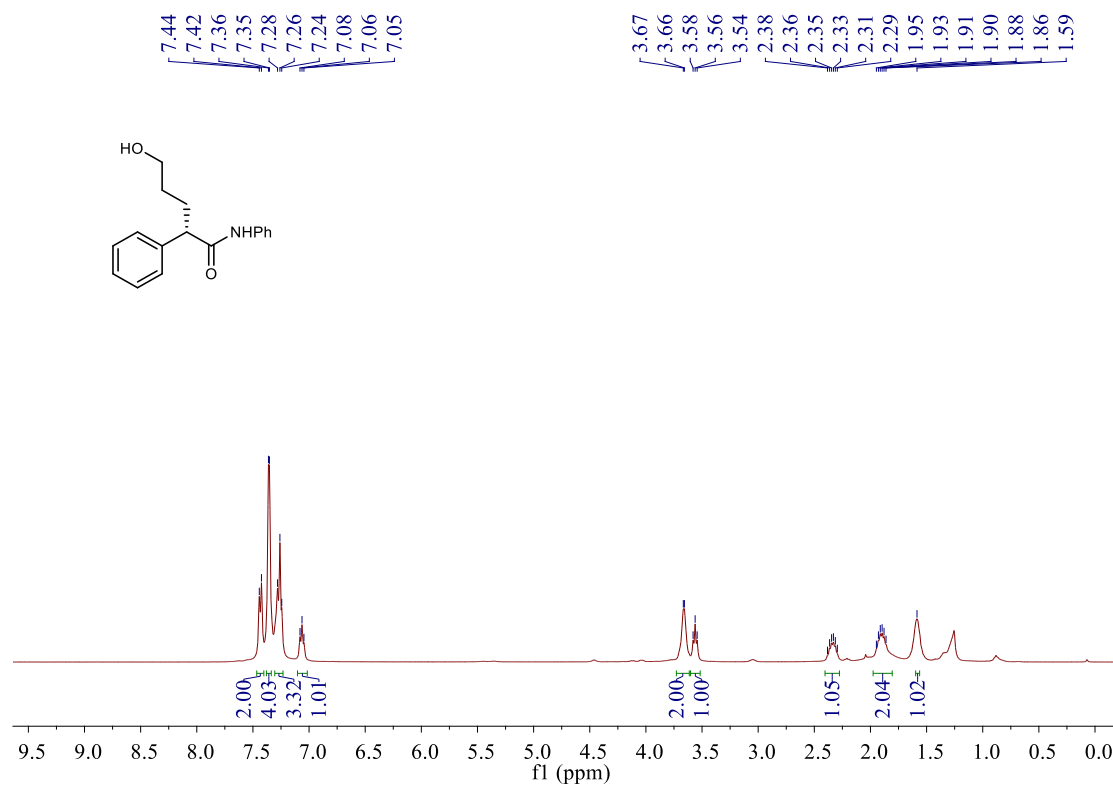

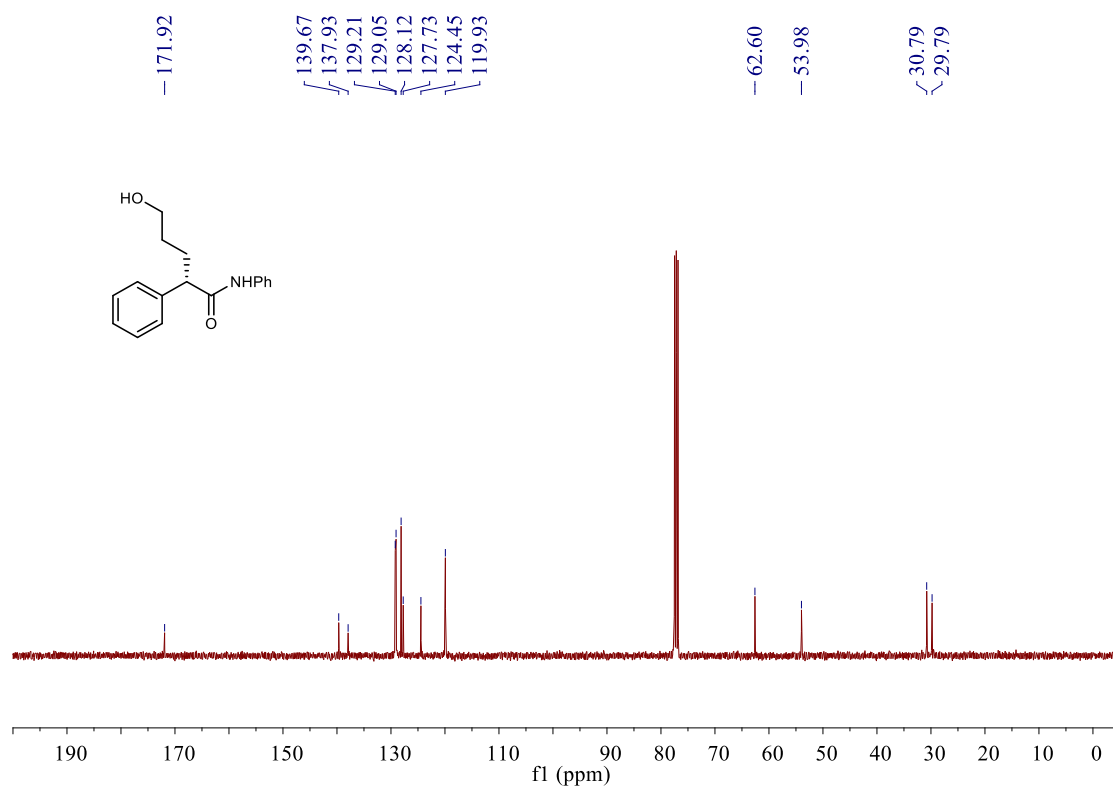

**Compound 49 (<sup>1</sup>H NMR and <sup>13</sup>C NMR, CDCl<sub>3</sub>, 400 MHz and 101 MHz respectively)**

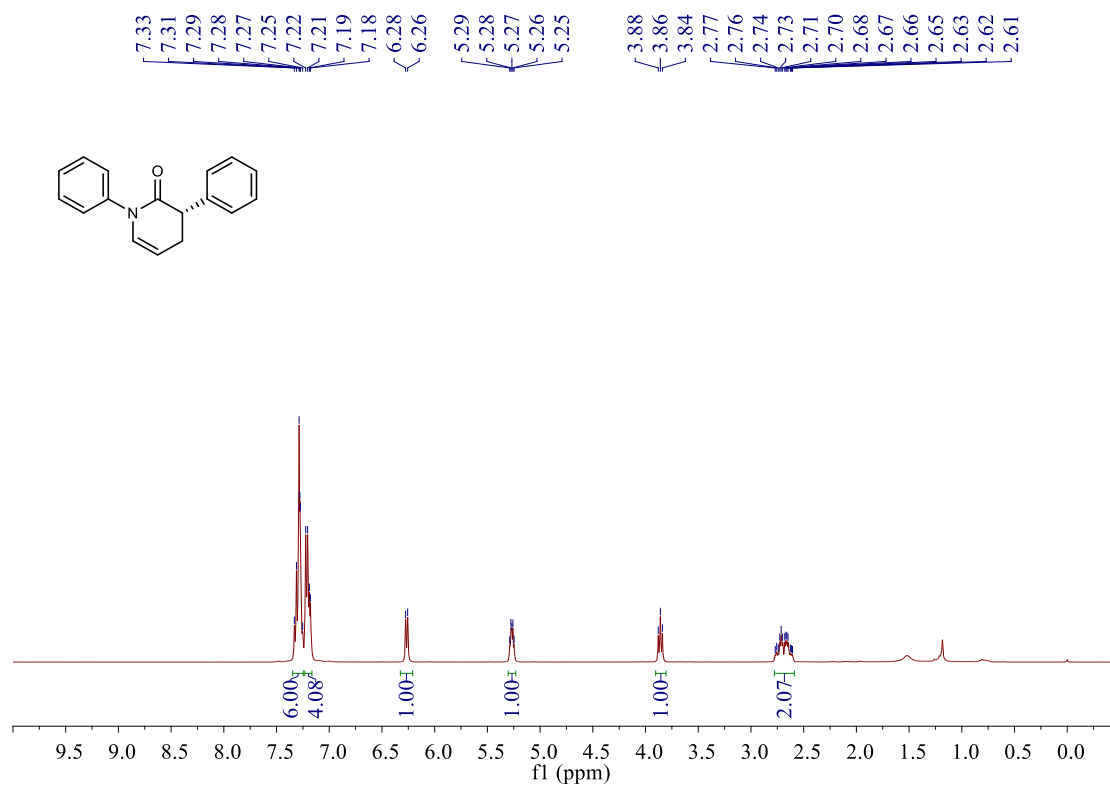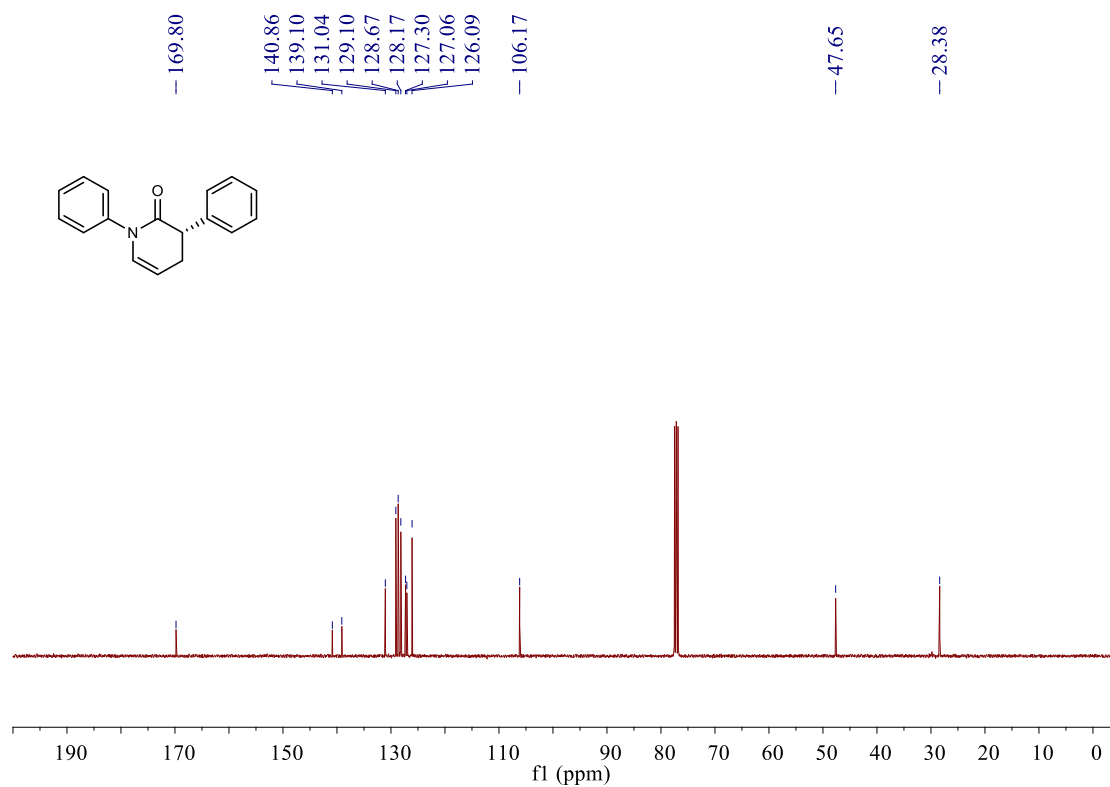

**Compound 50 (<sup>1</sup>H NMR and <sup>13</sup>C NMR, CDCl<sub>3</sub>, 400 MHz and 101 MHz respectively)**

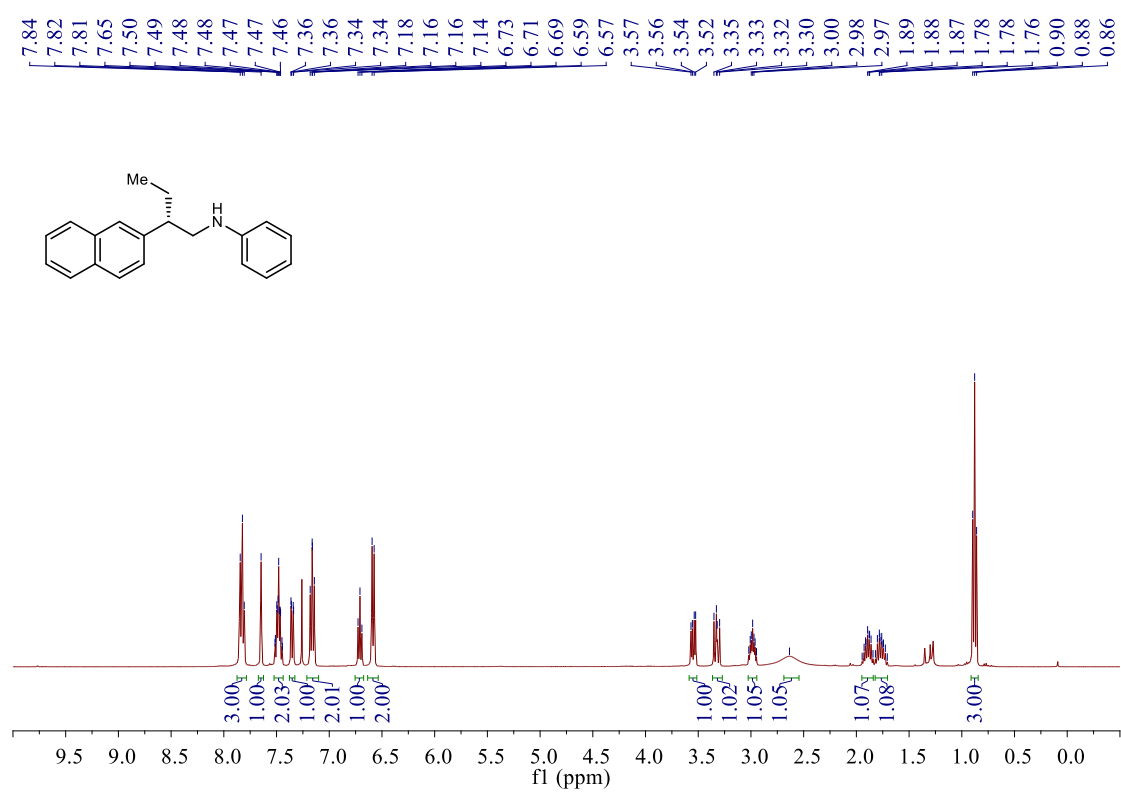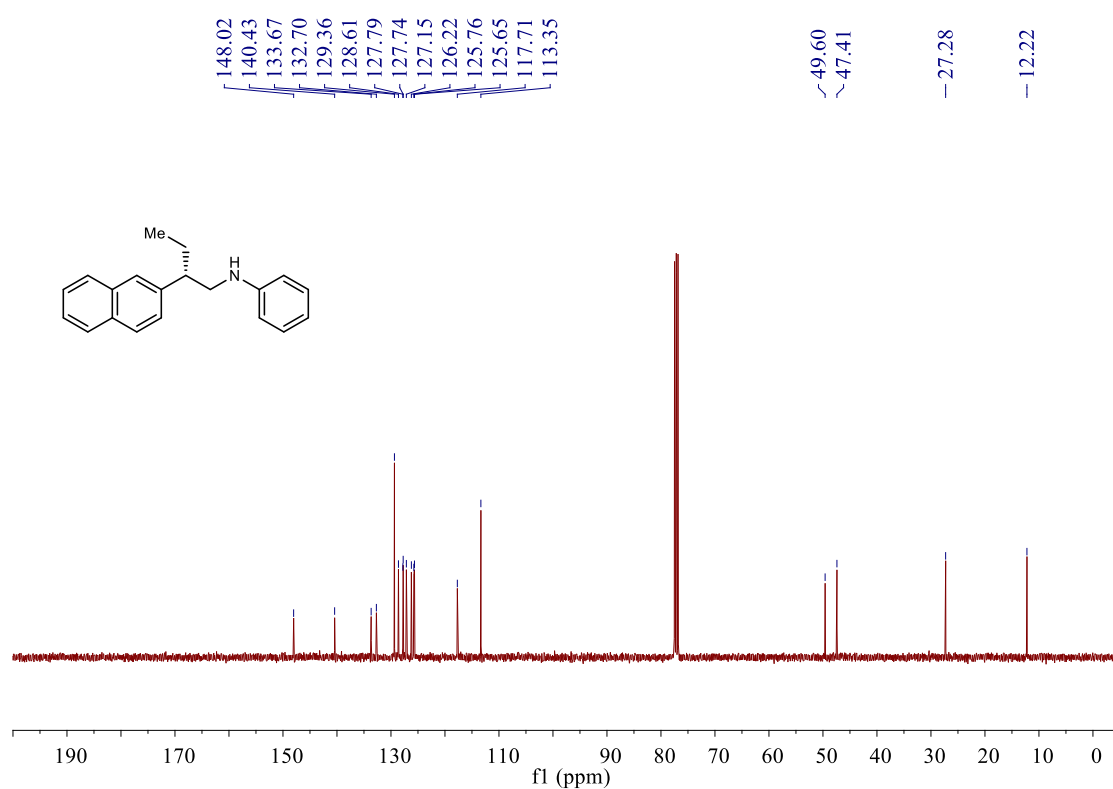

**Compound 51 ( $^1\text{H}$  NMR and  $^{13}\text{C}$  NMR,  $\text{CDCl}_3$ , 400 MHz and 101 MHz respectively)**

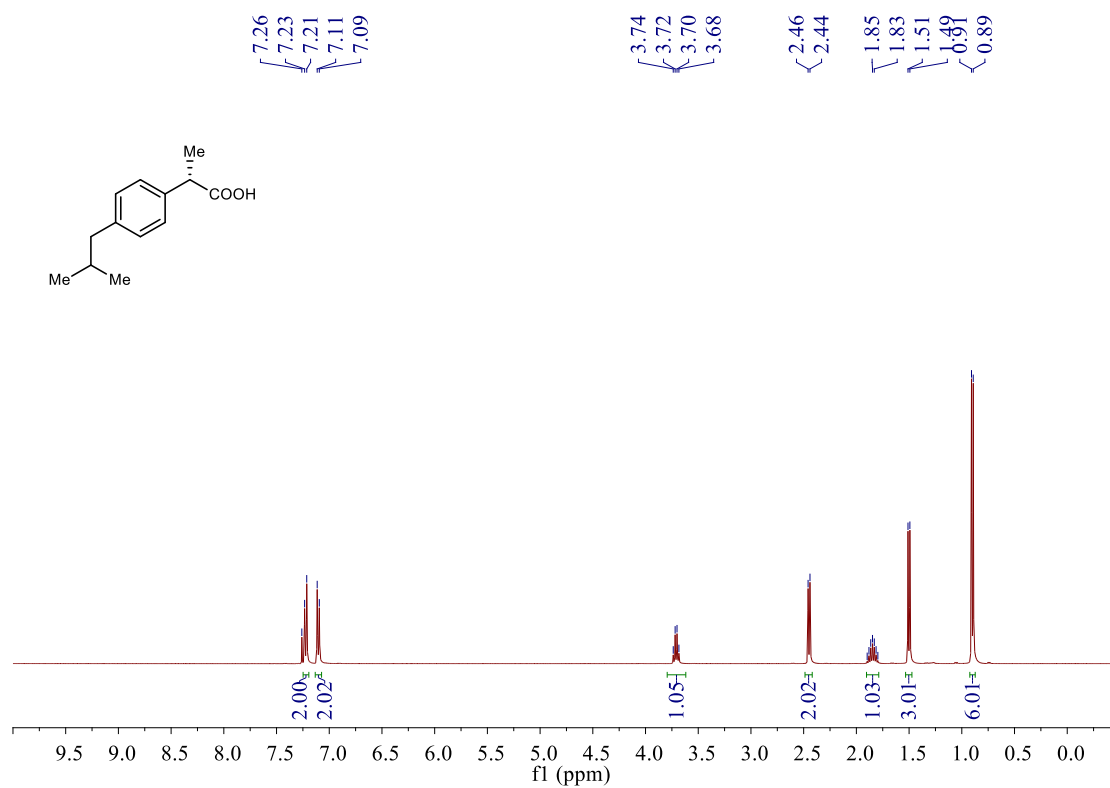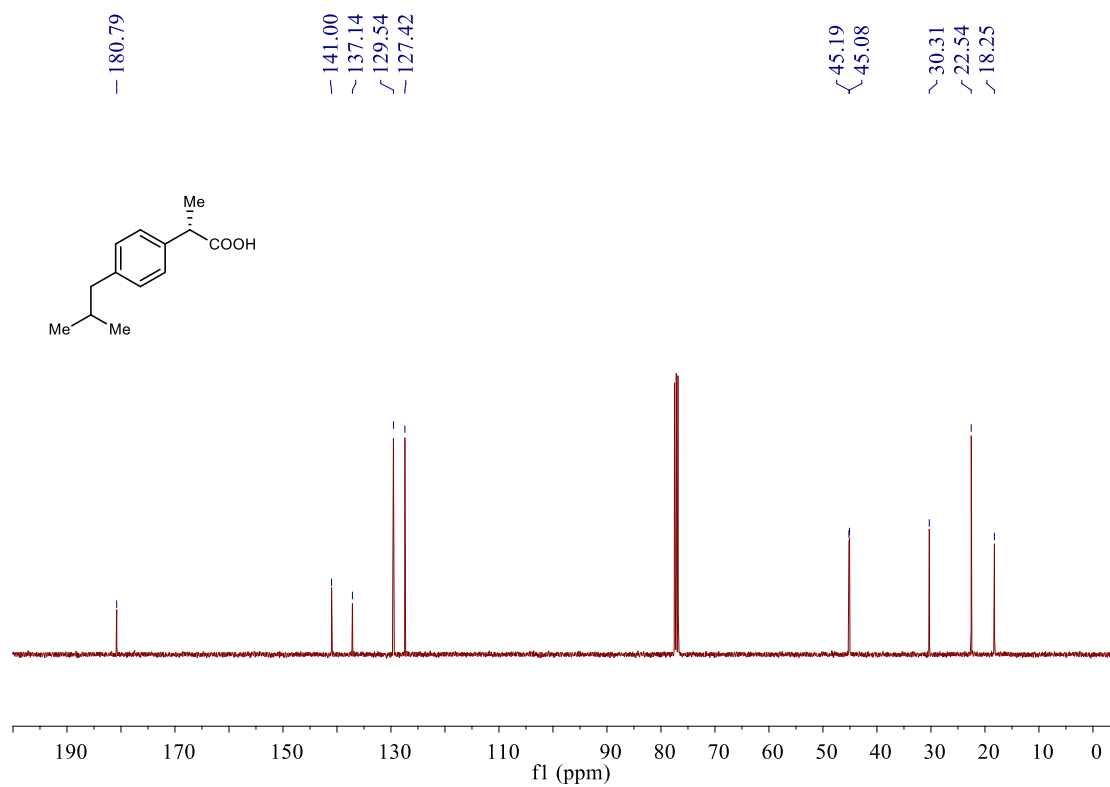

**Compound 52 ( $^1\text{H}$  NMR,  $^{13}\text{C}$  NMR and  $^{19}\text{F}$  NMR,  $\text{CDCl}_3$ , 400 MHz, 101 MHz and 376 MHz respectively)**

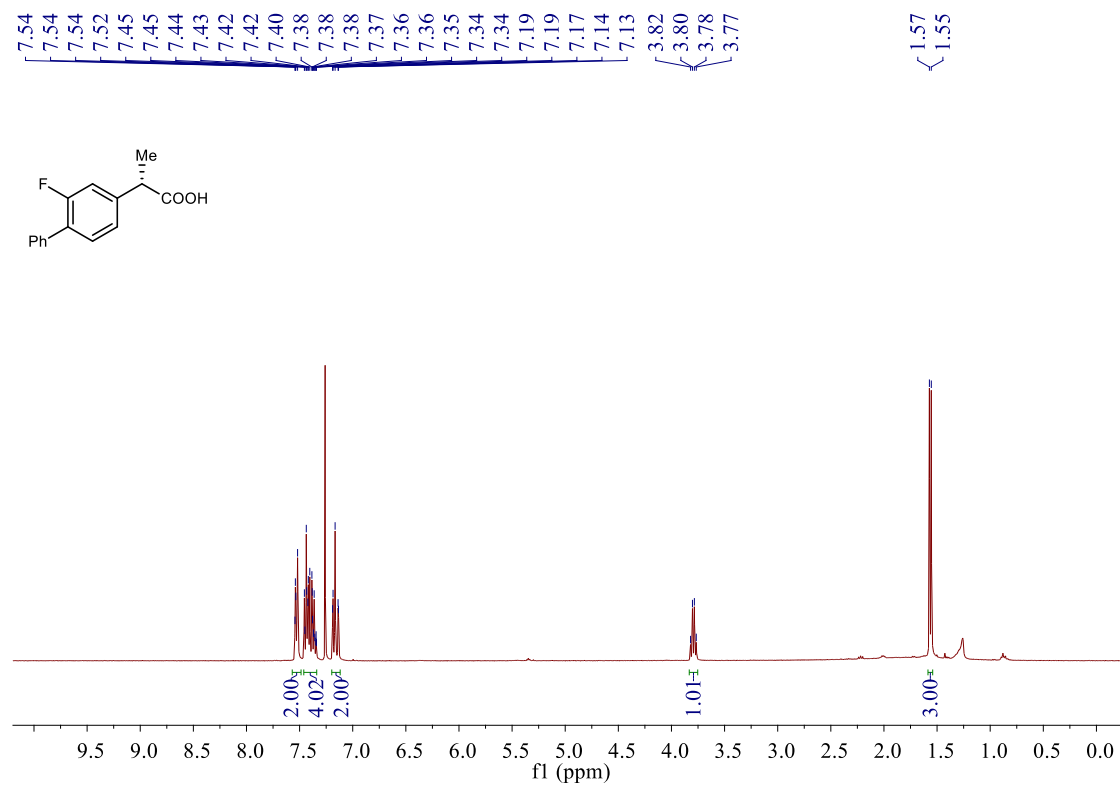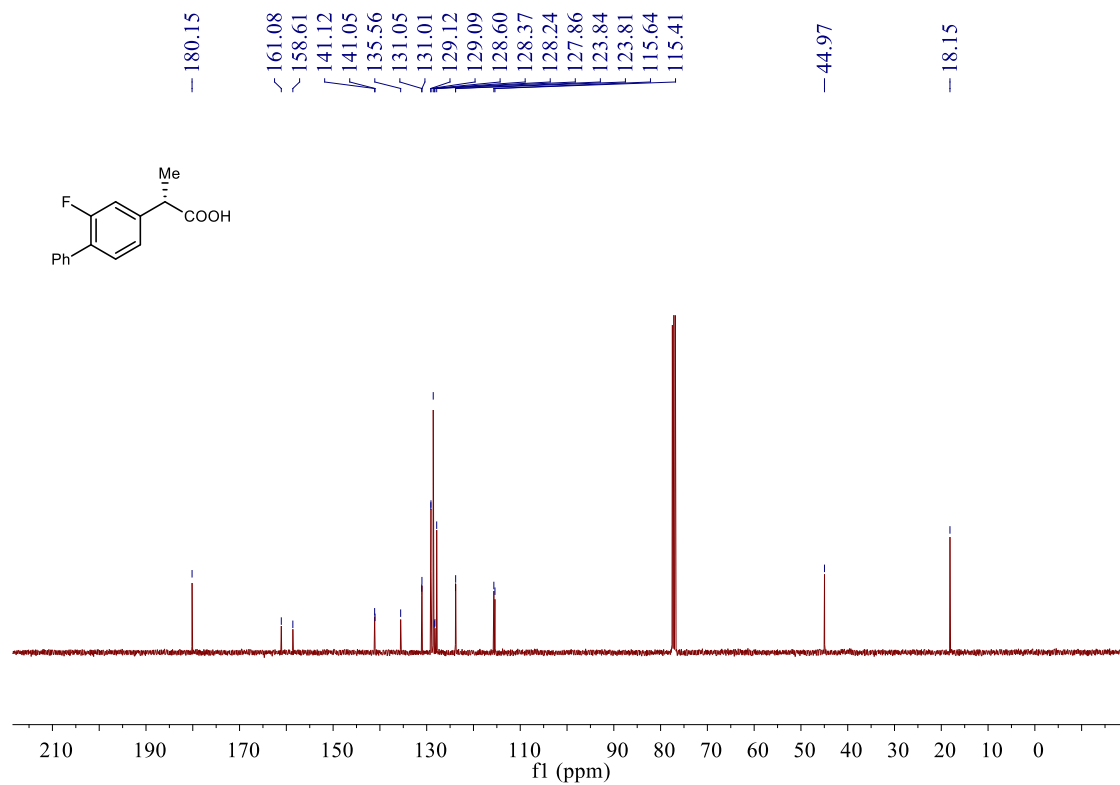



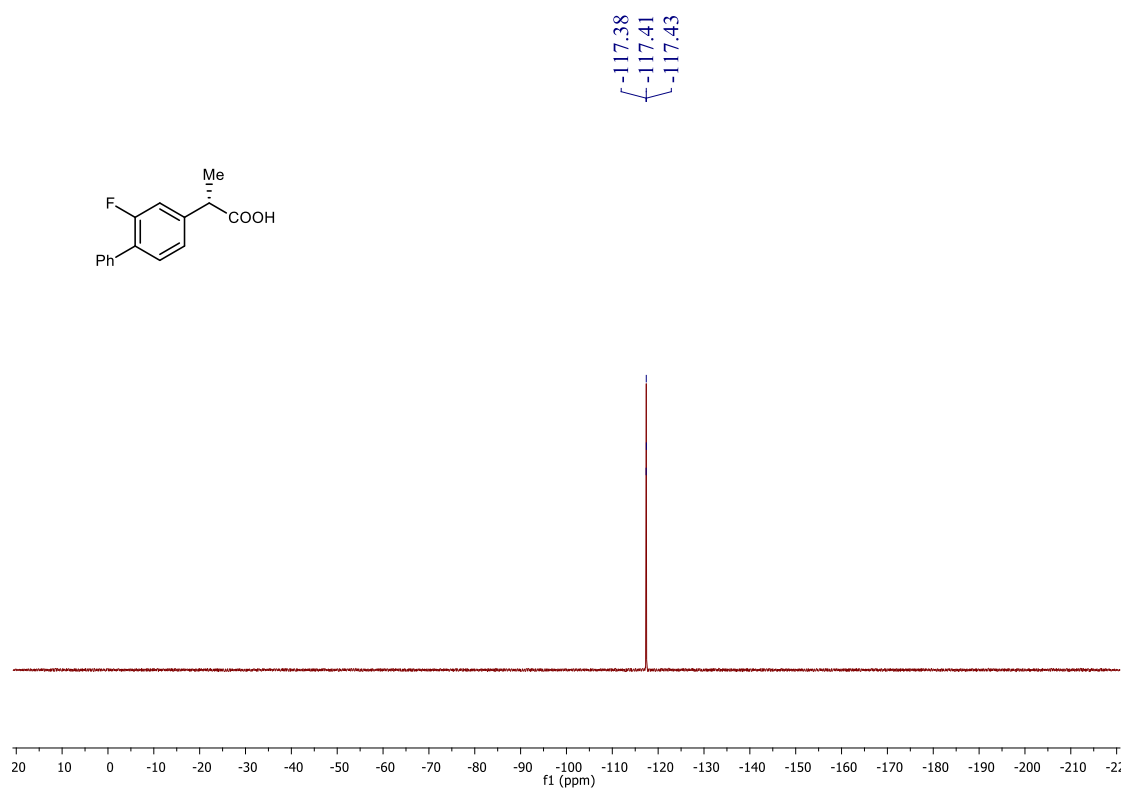

**Compound 5 ( $^1\text{H}$  NMR and  $^{13}\text{C}$  NMR,  $\text{CDCl}_3$ , 400 MHz and 101 MHz respectively)**

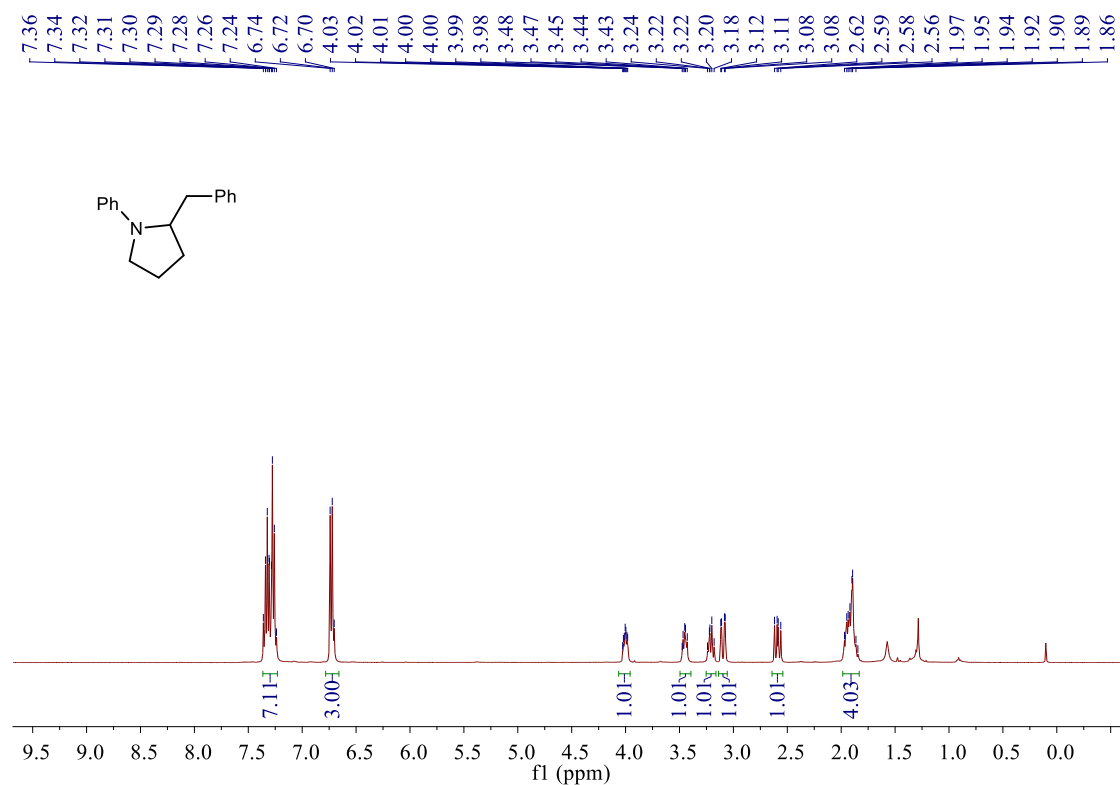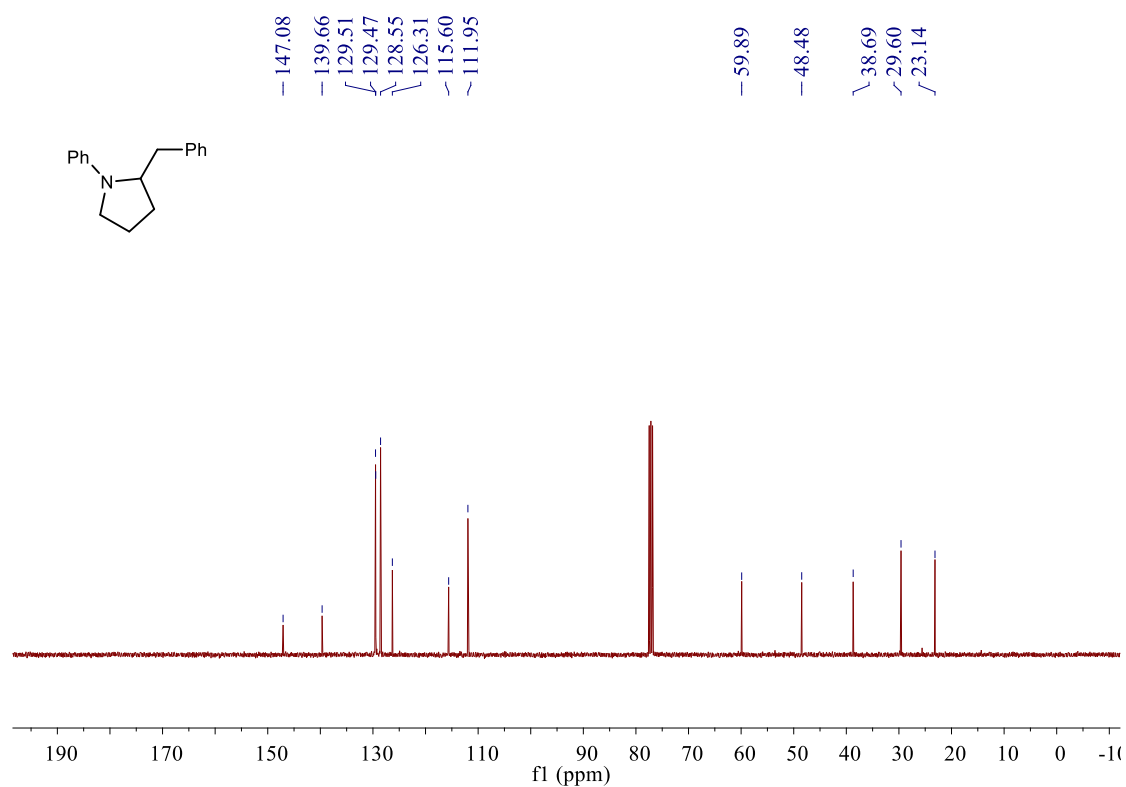

**Compound 7 ( $^1\text{H}$  NMR and  $^{13}\text{C}$  NMR,  $\text{CDCl}_3$ , 400 MHz and 101 MHz respectively)**

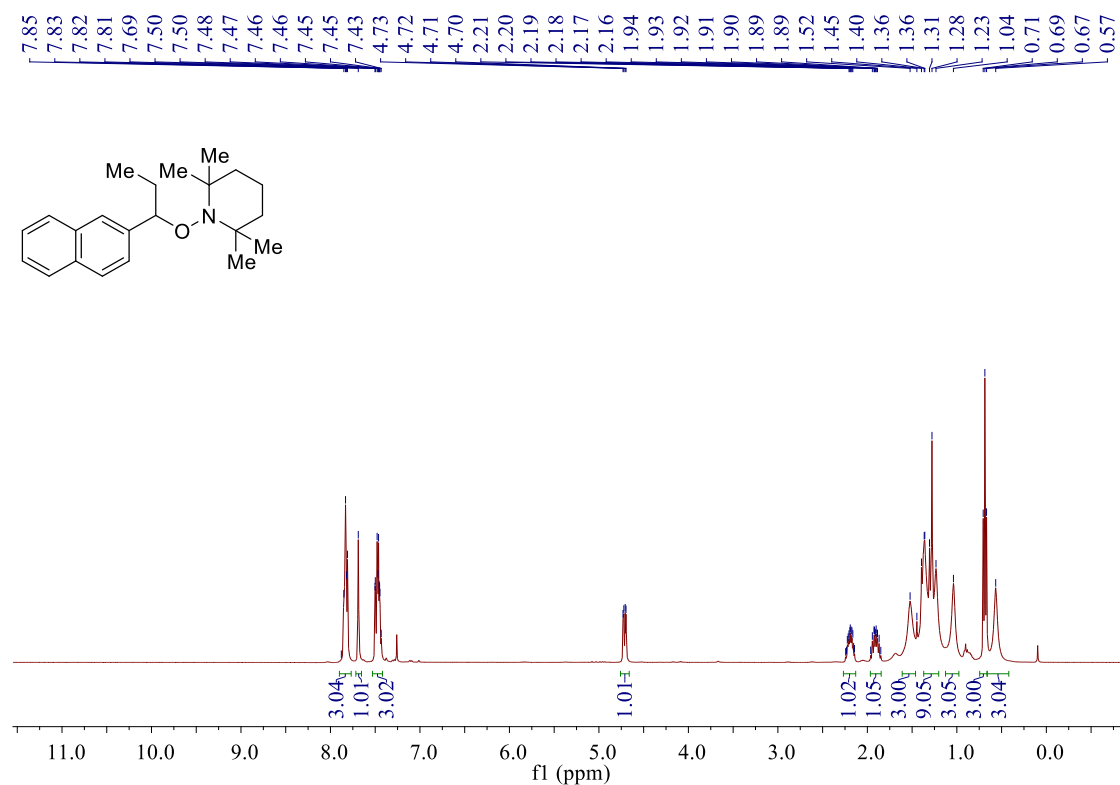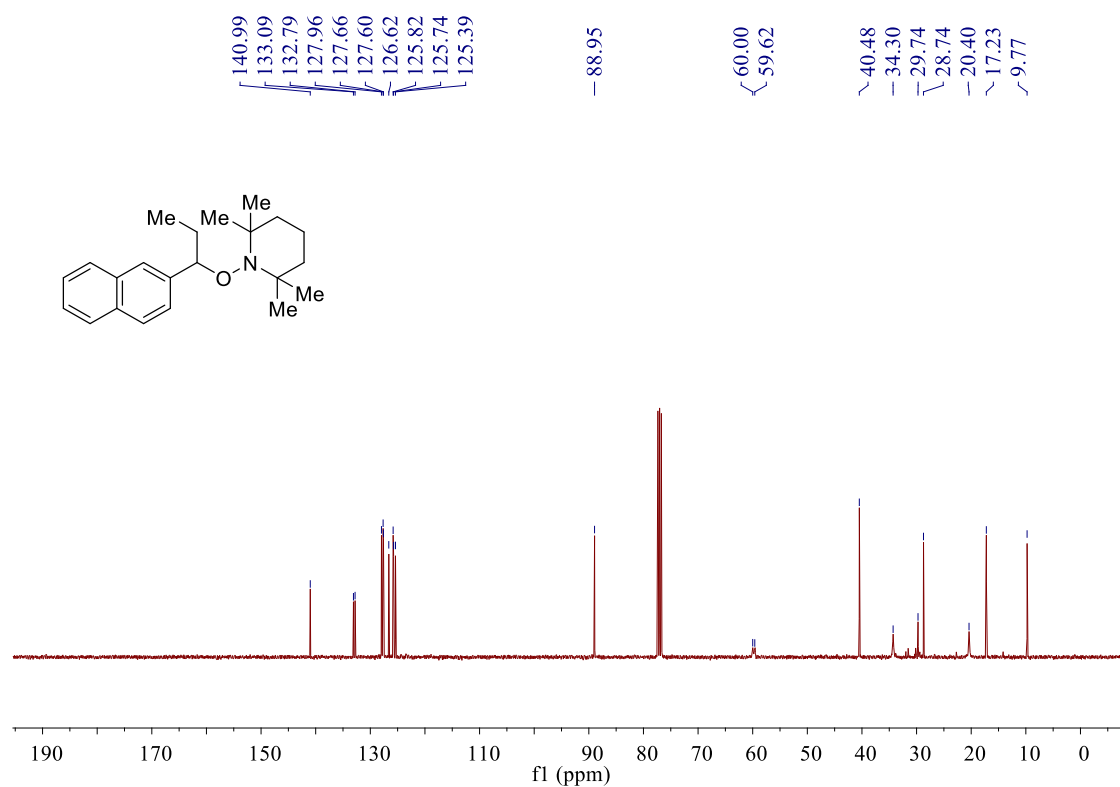

**Compound 54 ( $^1\text{H}$  NMR,  $\text{CDCl}_3$ , 400 MHz)**

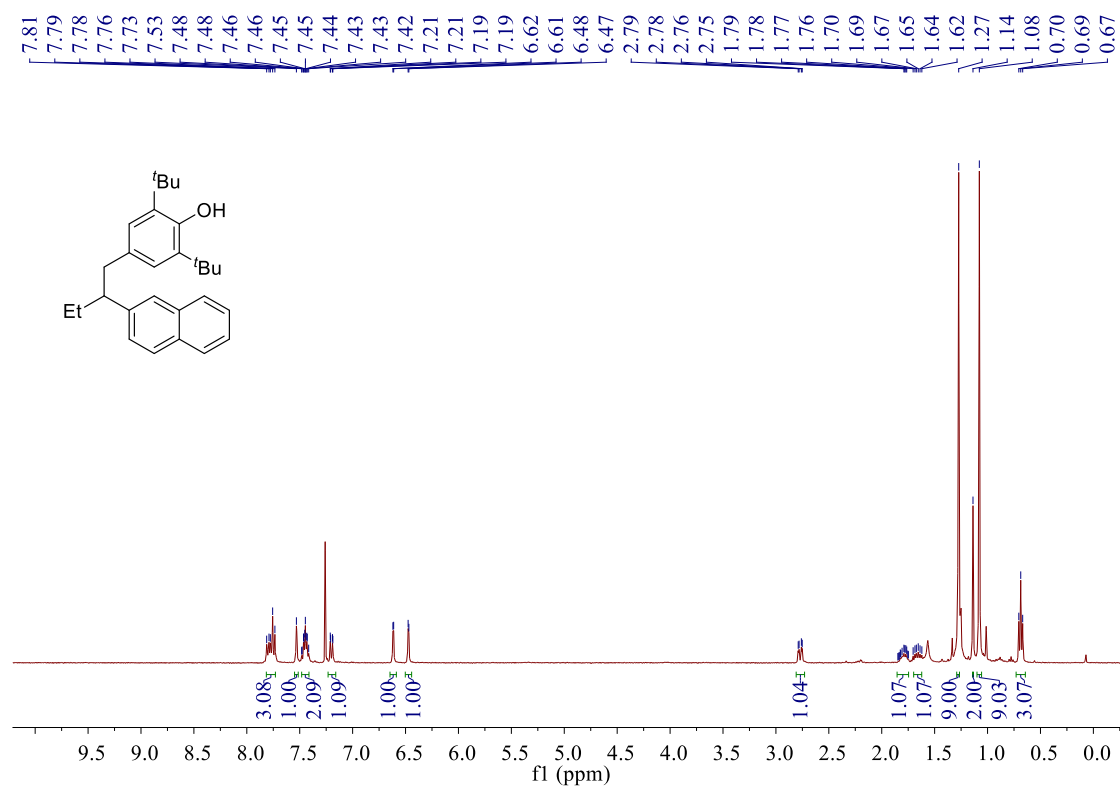

**Compound 55 ( $^1\text{H}$  NMR and  $^{13}\text{C}$  NMR,  $\text{CDCl}_3$ , 400 MHz and 101 MHz respectively)**

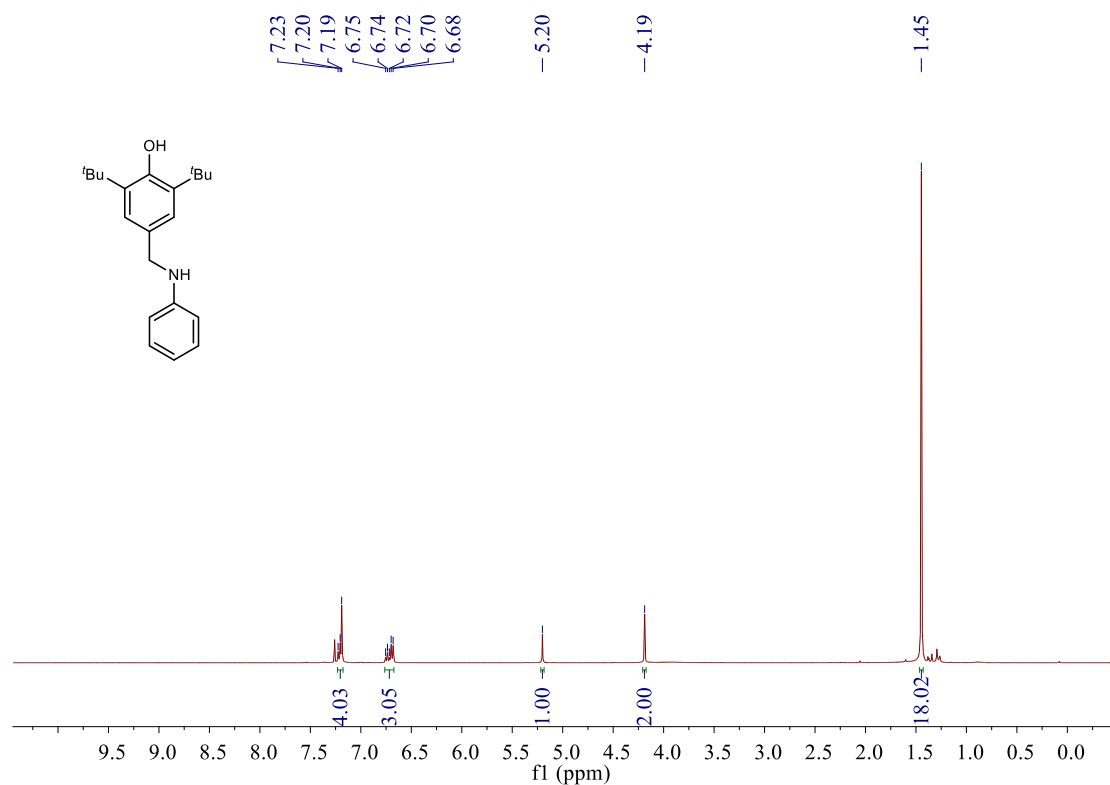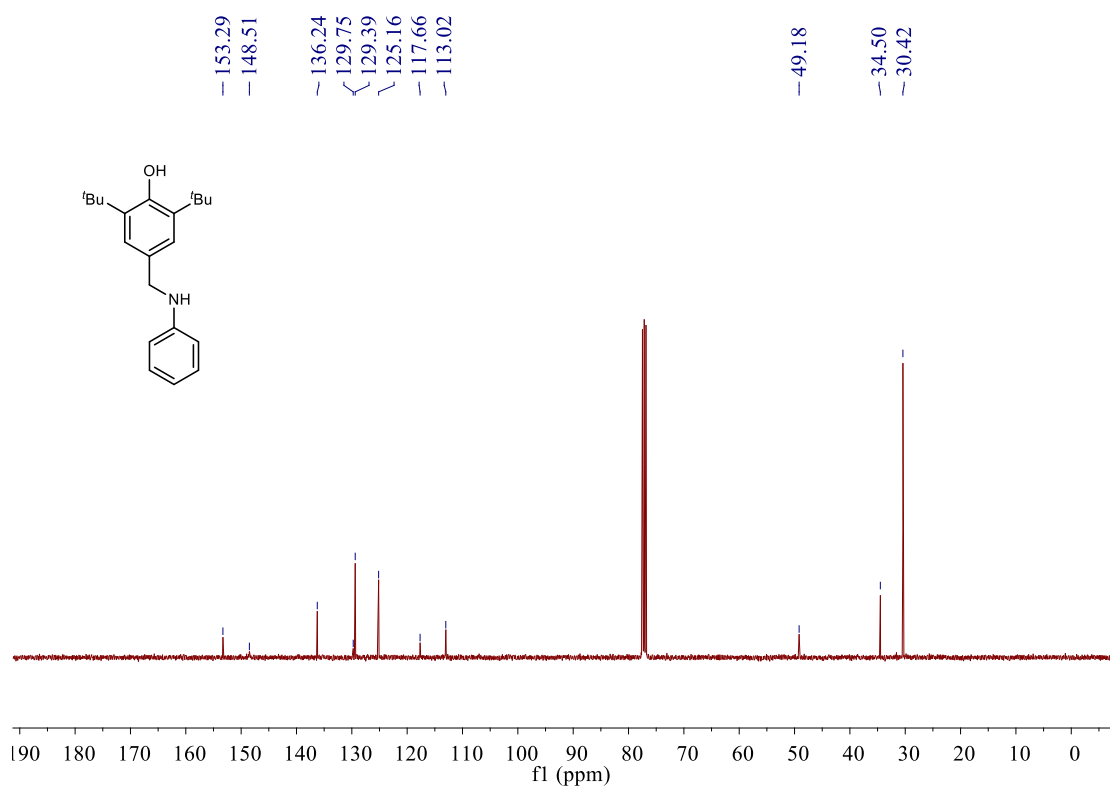

**<sup>1</sup>H NMR spectrum (CDCl<sub>3</sub>) of (S)-1-(4-methoxyphenyl)-2-((S)-2-cyano-2-phenyl-1H-imidazolidin-1-ylidene)-1H-imidazolidin-3-one.**

**Chemical structure:** COc1ccc(cc1)C2=CN(C2C(=O)N3C(=O)C(=O)N3C(=O)c4ccccc4)C(=O)c5ccccc5

**Peak list (ppm):** 7.87, 7.86, 7.85, 7.38, 7.37, 7.36, 7.35, 7.22, 7.21, 7.16, 7.15, 7.15, 7.13, 7.13, 6.80, 6.80, 6.78, 6.78, 5.04, 5.03, 5.02, 5.01, 3.86, 3.84, 3.82, 3.80, 3.79, 3.29, 1.65, 1.61, 1.58, 1.56, 1.23, 1.22, 1.21, 1.20, 1.20, 1.18, 1.17, 1.15, 1.14, 1.12, 1.12.

**Integration values:** 0.87, 1.02, 2.03, 3.05, 0.96, 1.00, 2.06, 3.02, 3.05, 2.00, 8.06, 2.01, 7.01.

**Solvent peak:** CH<sub>3</sub>CN (arrow pointing to peak at ~0.7 ppm).

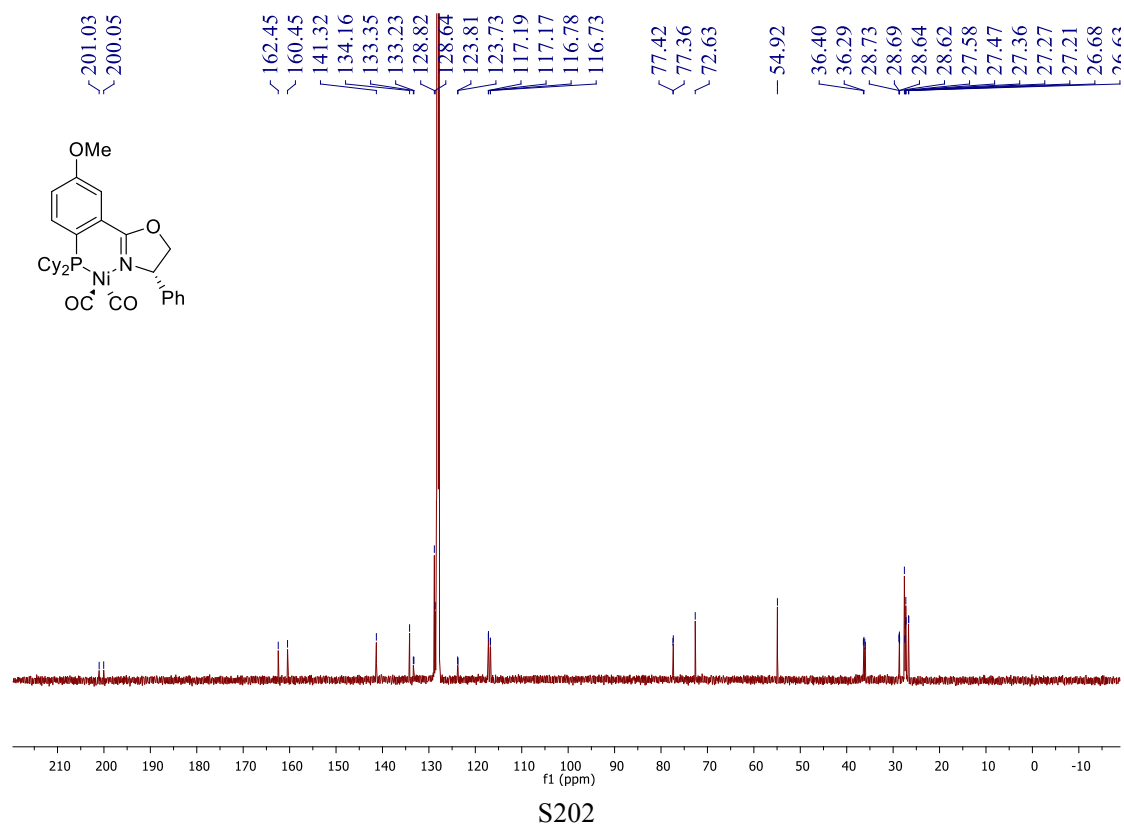

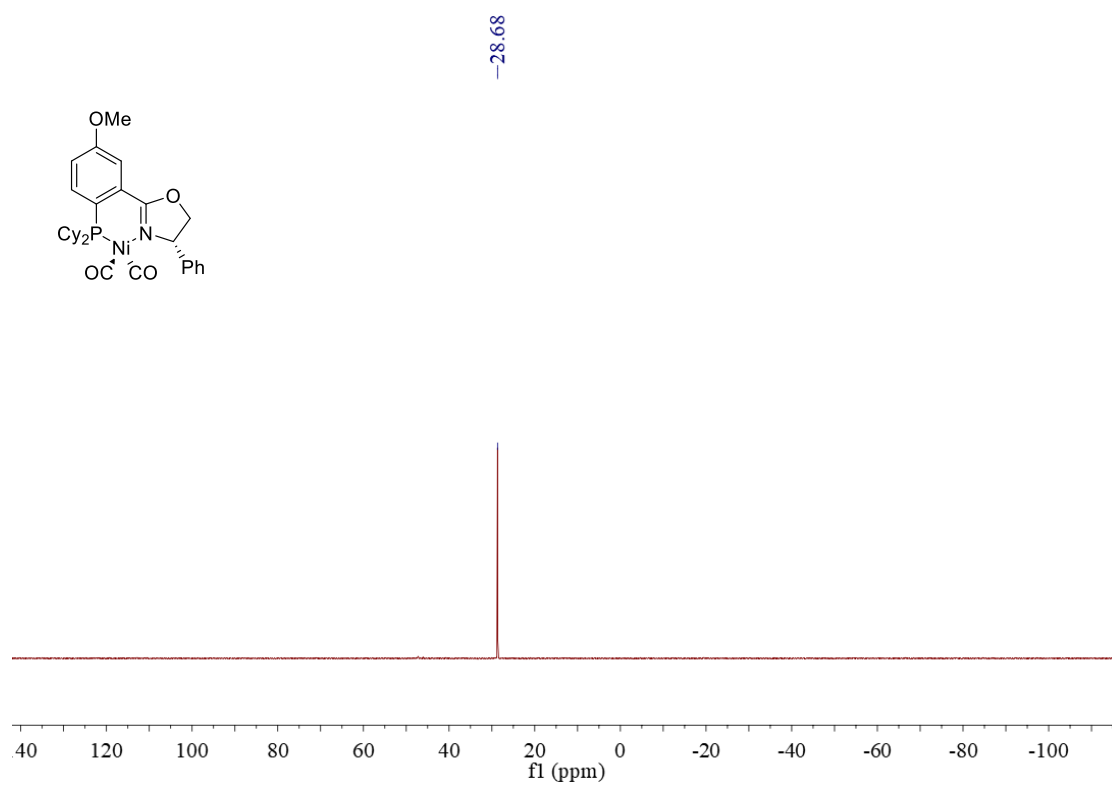

## 11. References

- 1 Kiyokawa, K., Yasuda, M. & Baba, A. Cyclopropylmethylation of Benzylic and Allylic Chlorides with Cyclopropylmethylstannane Catalyzed by Gallium or Indium Halide. *Org. Lett.* **12**, 1520-1523 (2010).
- 2 Yang, Y., Saffon-Merceron, N., Vantourout, J. C. & Tlili, A. Novel N(SCF<sub>3</sub>)(CF<sub>3</sub>)-amines: synthesis, scalability and stability. *Chem. Sci.* **14**, 3893-3898 (2023).
- 3 Musacchio, A. J., Nguyen, L. Q., Beard, G. H. & Knowles, R. R. Catalytic Olefin Hydroamination with Aminium Radical Cations: A Photoredox Method for Direct C–N Bond Formation. *J. Am. Chem. Soc.* **136**, 12217-12220 (2014).
- 4 Guo, W.-T. *et al.* Enantioselective Rh-Catalyzed Azide-Internal-Alkyne Cycloaddition for the Construction of Axially Chiral 1,2,3-Triazoles. *J. Am. Chem. Soc.* **144**, 6981-6991 (2022).
- 5 Shao, W., Besnard, C., Guénée, L. & Mazet, C. Ni-Catalyzed Regiodivergent and Stereoselective Hydroalkylation of Acyclic Branched Dienes with Unstabilized C(sp<sup>3</sup>) Nucleophiles. *J. Am. Chem. Soc.* **142**, 16486-16492 (2020).
- 6 Yao, Y.-H. *et al.* Asymmetric Markovnikov Hydroaminocarbonylation of Alkenes Enabled by Palladium-Monodentate Phosphoramidite Catalysis. *J. Am. Chem. Soc.* **143**, 85-91 (2021).
- 7 Pan, J.-B., Yang, Z.-C., Zhang, X.-G., Li, M.-L. & Zhou, Q.-L. Enantioselective Synthesis of Chiral Amides by a Phosphoric Acid Catalyzed Asymmetric Wolff Rearrangement. *Angew. Chem. Int. Ed.* **62**, e202308122 (2023).
- 8 Cuesta-Galisteo, S., Schörgenhumer, J., Hervieu, C. & Nevado, C. Dual Nickel/Photoredox-Catalyzed Asymmetric Carbamoylation of Benzylic C(sp<sup>3</sup>)–H Bonds. *Angew. Chem. Int. Ed.* **63**, e202313717 (2024).
- 9 Ji, X. *et al.* Catalyst-free synthesis of  $\alpha,\alpha$ -disubstituted carboxylic acid derivatives under ambient conditions via a Wolff rearrangement reaction. *Org. Chem. Front.* **8**, 6916-6922 (2021).
- 10 Zhao, X. *et al.* Divergent Aminocarbonylations of Alkynes Enabled by Photoredox/Nickel Dual Catalysis. *Angew. Chem. Int. Ed.* **60**, 26511-26517 (2021).
- 11 Smith, S. M. *et al.* Scope, Limitations and Mechanistic Analysis of the HyperBTM-Catalyzed Acylative Kinetic Resolution of Tertiary Heterocyclic Alcohols. *Eur. J. Org. Chem.* **2022**, e202101111 (2022).



- 12 Pretze, M. *et al.* Synthesis, radiolabelling and initial biological characterisation of <sup>18</sup>F-labelled xanthine derivatives for PET imaging of Eph receptors. *Org. Biomol. Chem.* **18**, 3104-3116 (2020).
- 13 Byun, S. *et al.* Enantioselective Copper-Catalyzed Borylative Amidation of Allenes. *J. Am. Chem. Soc.* **144**, 22850-22857 (2022).
- 14 Zhou, F. & Zhu, S. Catalytic Asymmetric Hydroalkylation of  $\alpha,\beta$ -Unsaturated Amides Enabled by Regio-Reversed and Enantiodifferentiating syn-Hydronickellation. *ACS Catal.* **11**, 8766-8773 (2021).
- 15 Joseph, D., Park, M. S. & Lee, S. Metal-free transamidation of benzoylpyrrolidin-2-one and amines under aqueous conditions. *Org. Biomol. Chem.* **19**, 6227-6232 (2021).
- 16 Kaga, A. *et al.* Degenerative xanthate transfer to olefins under visible-light photocatalysis. *Beilstein J. Org. Chem.* **14**, 3047-3058 (2018).
- 17 Hatchard, C. G., Parker, C. A. & Bowen, E. J. A new sensitive chemical actinometer - II. Potassium ferrioxalate as a standard chemical actinometer. *Proc. R. Soc. Lond. A* **235**, 518-536 (1956).
